# Supplementary material for: Amyloid-beta 42 adsorption following serial tube transfer
Source: PubMed Central journal article supplement (PMC4059346; doi:10.1186/alzrt236), 2014-01-28

## Report Properties

Title: Experiment\_20130319155319

Author: Administrator

Creator: Administrator

Report Date: 19-Mar-2013

## Notes

**Plate Properties**

| Name           | Value                   |
|----------------|-------------------------|
| User           | Administrator           |
| Read Time      | 03/19/2013 15:46:28 GMT |
| Det Param      | Standard                |
| Type           | 96 Multi-Spot 4         |
| Wells Per Row  | 12                      |
| Wells Per Col  | 8                       |
| Spots Per Well | 4                       |
| Stack ID       | 0                       |
| Barcode1       | *25C4TAE6512*           |
| Barcode2       | N/A                     |
| Barcode3       | N/A                     |
| Plate #        | 1223                    |
| Model          | IPR                     |
| Serial #       | 1200120302692           |
| Version        | MSD_3_0_18              |
| Orient         | 0                       |
| Comments       |                         |

**190313-WTBioM07-Ttau - Assay Assignment**

Spot : &lt;a1&gt; &lt;a2&gt;

Legend : &lt;b1&gt; &lt;b2&gt;

| Assay Assignment |            |
|------------------|------------|
| Spot ID          | Assay Name |
| 1                | Total Tau  |
| 2                |            |
| 3                |            |
| 4                |            |

**190313-WTBioM07-Ttau - Group Association**

| Group Association |            |                |       |
|-------------------|------------|----------------|-------|
| Assay Name        | Group Name | Back Fit Curve | Blank |
| Total Tau         | Unknown    | Standard       |       |

| Group Association |            |                |       |
|-------------------|------------|----------------|-------|
| Assay Name        | Group Name | Back Fit Curve | Blank |
| Total Tau         | Standard   | -              |       |

**190313-WTBioM07-Ttau - Sample Definition**

|          | 1             | 2             | 3                 | 4                 | 5                 | 6                        | 7                        | 8                        | 9          | 10                       | 11                       | 12                       |
|----------|---------------|---------------|-------------------|-------------------|-------------------|--------------------------|--------------------------|--------------------------|------------|--------------------------|--------------------------|--------------------------|
| <b>A</b> | S001 Standard | S001 Standard | NAD 1 Unkno<br>wn | NAD 1 Unkno<br>wn | NAD 1 Unkno<br>wn | NCT 1 Unkno<br>wn        | NCT 1 Unkno<br>wn        | NCT 1 Unkno<br>wn        | B002 Blank | TCT 1 Unkno<br>wn        | TCT 1 Unkno<br>wn        | TCT 1 Unkno<br>wn        |
| <b>B</b> | S002 Standard | S002 Standard | NAD 2 Unkno<br>wn | NAD 2 Unkno<br>wn | NAD 2 Unkno<br>wn | NCT 2 Unkno<br>wn        | NCT 2 Unkno<br>wn        | NCT 2 Unkno<br>wn        | B002 Blank | TCT 2 Unkno<br>wn        | TCT 2 Unkno<br>wn        | TCT 2 Unkno<br>wn        |
| <b>C</b> | S003 Standard | S003 Standard | NAD 3 Unkno<br>wn | NAD 3 Unkno<br>wn | NAD 3 Unkno<br>wn | NCT 3 Unkno<br>wn        | NCT 3 Unkno<br>wn        | NCT 3 Unkno<br>wn        | B002 Blank | TCT 3 Unkno<br>wn        | TCT 3 Unkno<br>wn        | TCT 3 Unkno<br>wn        |
| <b>D</b> | S004 Standard | S004 Standard | NAD 4 Unkno<br>wn | NAD 4 Unkno<br>wn | NAD 4 Unkno<br>wn | NCT 4 Unkno<br>wn        | NCT 4 Unkno<br>wn        | NCT 4 Unkno<br>wn        | B002 Blank | TCT 4 Unkno<br>wn        | TCT 4 Unkno<br>wn        | TCT 4 Unkno<br>wn        |
| <b>E</b> | S005 Standard | S005 Standard | NAD 5 Unkno<br>wn | NAD 5 Unkno<br>wn | NAD 5 Unkno<br>wn | NCT 5 Unkno<br>wn        | NCT 5 Unkno<br>wn        | NCT 5 Unkno<br>wn        | B002 Blank | TCT 5 Unkno<br>wn        | TCT 5 Unkno<br>wn        | TCT 5 Unkno<br>wn        |
| <b>F</b> | S006 Standard | S006 Standard | TAD 1 Unkno<br>wn | TAD 1 Unkno<br>wn | TAD 1 Unkno<br>wn | TAD 4 Unkno<br>wn        | TAD 4 Unkno<br>wn        | TAD 4 Unkno<br>wn        | B002 Blank | NCT 1 tip<br>Unkno<br>wn | NCT 1 tip<br>Unkno<br>wn | NCT 1 tip<br>Unkno<br>wn |
| <b>G</b> | S007 Standard | S007 Standard | TAD 2 Unkno<br>wn | TAD 2 Unkno<br>wn | TAD 2 Unkno<br>wn | TAD 5 Unkno<br>wn        | TAD 5 Unkno<br>wn        | TAD 5 Unkno<br>wn        | B002 Blank | TAD 1 tip<br>Unkno<br>wn | TAD 1 tip<br>Unkno<br>wn | TAD 1 tip<br>Unkno<br>wn |
| <b>H</b> | B001 Blank    | B001 Blank    | TAD3 Unkno<br>wn  | TAD3 Unkno<br>wn  | TAD3 Unkno<br>wn  | NAD 1 tip<br>Unkno<br>wn | NAD 1 tip<br>Unkno<br>wn | NAD 1 tip<br>Unkno<br>wn | B002 Blank | TCT 1 tip<br>Unkno<br>wn | TCT 1 tip<br>Unkno<br>wn | TCT 1 tip<br>Unkno<br>wn |

**190313-WTBioM07-Ttau - Total Tau's Concentration/Dilution Definition**

|   | 1    | 2    | 3 | 4 | 5 | 6 | 7 | 8 | 9 | 10 | 11 | 12 |
|---|------|------|---|---|---|---|---|---|---|----|----|----|
| A | 3227 | 3227 | 8 | 8 | 8 | 8 | 8 | 8 |   | 8  | 8  | 8  |
| B | 1076 | 1076 | 8 | 8 | 8 | 8 | 8 | 8 |   | 8  | 8  | 8  |
| C | 359  | 359  | 8 | 8 | 8 | 8 | 8 | 8 |   | 8  | 8  | 8  |
| D | 120  | 120  | 8 | 8 | 8 | 8 | 8 | 8 |   | 8  | 8  | 8  |
| E | 39.8 | 39.8 | 8 | 8 | 8 | 8 | 8 | 8 |   | 8  | 8  | 8  |
| F | 13.3 | 13.3 | 8 | 8 | 8 | 8 | 8 | 8 |   | 8  | 8  | 8  |
| G | 4.43 | 4.43 | 8 | 8 | 8 | 8 | 8 | 8 |   | 8  | 8  | 8  |
| H |      |      | 8 | 8 | 8 | 8 | 8 | 8 |   | 8  | 8  | 8  |

## Plate Data Table

Plate: Plate\_\*25C4TAE6512\*

| Sample * | Assay | Well | Dilution | Concentration (pg/ml) | Signal | Mean | CV   | Calc. Concentration (pg/ml) | Calc. Conc. Mean (pg/ml) | Calc. Conc. CV |
|----------|-------|------|----------|-----------------------|--------|------|------|-----------------------------|--------------------------|----------------|
| B001     |       | H01  | N/A      | N/A                   | 30     | 35   | 20.2 | N/A                         | N/A                      | N/A            |
|          |       | H01  |          |                       | 30     |      |      | N/A                         |                          |                |
|          |       | H02  |          |                       | 40     |      |      | N/A                         |                          |                |
|          |       | H02  |          |                       | 40     |      |      | N/A                         |                          |                |
| B002     |       | F09  | N/A      | N/A                   | 35     | 38   | 12.3 | N/A                         | N/A                      | N/A            |
|          |       | F09  |          |                       | 35     |      |      | N/A                         |                          |                |
|          |       | D09  |          |                       | 33     |      |      | N/A                         |                          |                |
|          |       | D09  |          |                       | 33     |      |      | N/A                         |                          |                |
|          |       | H09  |          |                       | 36     |      |      | N/A                         |                          |                |
|          |       | H09  |          |                       | 36     |      |      | N/A                         |                          |                |
|          |       | B09  |          |                       | 33     |      |      | N/A                         |                          |                |
|          |       | B09  |          |                       | 33     |      |      | N/A                         |                          |                |
|          |       | C09  |          |                       | 45     |      |      | N/A                         |                          |                |
|          |       | C09  |          |                       | 45     |      |      | N/A                         |                          |                |
|          |       | E09  |          |                       | 38     |      |      | N/A                         |                          |                |
|          |       | E09  |          |                       | 38     |      |      | N/A                         |                          |                |
|          |       | A09  |          |                       | 44     |      |      | N/A                         |                          |                |
|          |       | A09  |          |                       | 44     |      |      | N/A                         |                          |                |
|          |       | G09  |          |                       | 40     |      |      | N/A                         |                          |                |
|          |       | G09  |          |                       | 40     |      |      | N/A                         |                          |                |
| NAD 1    |       | A05  | 8        | N/A                   | 1900   | 2014 | 5.61 | 1800                        | 1875                     | 3.95           |
|          |       | A04  |          |                       | 2126   |      |      | 1948                        |                          |                |
|          |       | A03  |          |                       | 2015   |      |      | 1876                        |                          |                |
| NAD 2    |       | B03  | 8        | N/A                   | 2082   | 2122 | 2.36 | 1920                        | 1945                     | 1.66           |
|          |       | B04  |          |                       | 2105   |      |      | 1934                        |                          |                |

Plate: Plate\_\*25C4TAE6512\*

| Sample *  | Assay | Well | Dilution | Concentration (pg/ml) | Signal | Mean | CV   | Calc. Concentration (pg/ml) | Calc. Conc. Mean (pg/ml) | Calc. Conc. CV |
|-----------|-------|------|----------|-----------------------|--------|------|------|-----------------------------|--------------------------|----------------|
|           |       | B05  |          |                       | 2178   |      |      | 1981                        |                          |                |
| NAD 3     |       | C03  | 8        | N/A                   | 1917   | 1998 | 4.53 | 1811                        | 1865                     | 3.18           |
|           |       | C05  |          |                       | 1982   |      |      | 1854                        |                          |                |
|           |       | C04  |          |                       | 2096   |      |      | 1929                        |                          |                |
|           |       | D04  |          |                       | 1826   |      |      | 1750                        |                          |                |
| NAD 4     |       | D05  | 8        | N/A                   | 1962   | 1838 | 6.47 | 1841                        | 1758                     | 4.55           |
|           |       | D03  |          |                       | 1725   |      |      | 1682                        |                          |                |
|           |       | E03  |          |                       | 1466   |      |      | 1499                        |                          |                |
| NAD 5     |       | E04  | 8        | N/A                   | 1526   | 1478 | 2.96 | 1542                        | 1507                     | 2.09           |
|           |       | E05  |          |                       | 1441   |      |      | 1481                        |                          |                |
|           |       | H07  |          |                       | 1380   |      |      | 1436                        |                          |                |
| NAD 1 tip |       | H06  | 8        | N/A                   | 1452   | 1283 | 18.2 | 1489                        | 1360                     | 13.2           |
|           |       | H08  |          |                       | 1017   |      |      | 1156                        |                          |                |
|           |       | A06  |          |                       | 506    |      |      | 694                         |                          |                |
| NCT 1     |       | A08  | 8        | N/A                   | 494    | 492  | 3.18 | 682                         | 679                      | 2.4            |
|           |       | A07  |          |                       | 475    |      |      | 662                         |                          |                |
|           |       | B06  |          |                       | 521    |      |      | 709                         |                          |                |
| NCT 2     |       | B07  | 8        | N/A                   | 507    | 507  | 2.86 | 695                         | 695                      | 2.15           |
|           |       | B08  |          |                       | 492    |      |      | 680                         |                          |                |
|           |       | C07  |          |                       | 464    |      |      | 650                         |                          |                |
| NCT 3     |       | C08  | 8        | N/A                   | 478    | 476  | 2.25 | 665                         | 662                      | 1.7            |
|           |       | C06  |          |                       | 485    |      |      | 672                         |                          |                |
|           |       | D07  |          |                       | 464    |      |      | 650                         |                          |                |
| NCT 4     |       | D08  | 8        | N/A                   | 458    | 456  | 2.13 | 644                         | 641                      | 1.62           |
|           |       | D06  |          |                       | 445    |      |      | 630                         |                          |                |
|           |       | E06  |          |                       | 339    |      |      | 510                         |                          |                |
| NCT 5     |       | E07  | 8        | N/A                   | 360    | 355  | 3.89 | 535                         | 528                      | 3.07           |

Plate: Plate\_\*25C4TAE6512\*

| Sample *  | Assay     | Well | Dilution | Concentration (pg/ml) | Signal | Mean  | CV    | Calc. Concentration (pg/ml) | Calc. Conc. Mean (pg/ml) | Calc. Conc. CV |
|-----------|-----------|------|----------|-----------------------|--------|-------|-------|-----------------------------|--------------------------|----------------|
|           | Total Tau | E08  |          |                       | 365    |       |       | 541                         |                          |                |
| NCT 1 tip |           | F10  |          |                       | 428    |       |       | 611                         |                          |                |
|           |           | F12  | 8        | N/A                   | 345    | 432   | 20.7  | 517                         | 614                      | 15.9           |
|           |           | F11  |          |                       | 524    |       |       | 712                         |                          |                |
|           |           |      |          |                       |        |       |       |                             |                          |                |
| S001      |           | A02  | N/A      | 3227                  | 59703  | 59410 | 0.699 | 3257                        | 3240                     | 0.766          |
|           |           | A01  |          |                       | 59116  |       |       | 3222                        |                          |                |
| S002      |           | B01  | N/A      | 1076                  | 16352  | 16586 | 1.99  | 1051                        | 1062                     | 1.51           |
|           |           | B02  |          |                       | 16819  |       |       | 1073                        |                          |                |
| S003      |           | C02  | N/A      | 359                   | 3866   | 3766  | 3.76  | 371                         | 364                      | 2.64           |
|           |           | C01  |          |                       | 3666   |       |       | 357                         |                          |                |
| S004      |           | D02  | N/A      | 120                   | 823    | 791   | 5.81  | 124                         | 120                      | 4.22           |
|           |           | D01  |          |                       | 758    |       |       | 117                         |                          |                |
| S005      |           | E01  | N/A      | 39.8                  | 175    | 186   | 8.36  | 36.3                        | 38.4                     | 7.65           |
|           |           | E02  |          |                       | 197    |       |       | 40.5                        |                          |                |
| S006      |           | F01  | N/A      | 13.3                  | 78     | 81    | 4.39  | 13.7                        | 14.4                     | 7.35           |
|           |           | F02  |          |                       | 83     |       |       | 15.2                        |                          |                |
| S007      |           | G02  | N/A      | 4.43                  | 56     | 53    | 9.43  | 5.63                        | 3.55                     | 82.7           |
|           |           | G01  |          |                       | 49     |       |       | 1.48                        |                          |                |
| TAD3      |           | H03  |          |                       | 1687   |       |       | 1655                        |                          |                |
|           |           | H05  | 8        | N/A                   | 1770   | 1767  | 4.47  | 1712                        | 1710                     | 3.15           |
|           |           | H04  |          |                       | 1845   |       |       | 1763                        |                          |                |
| TAD 1     |           | F03  |          |                       | 1996   |       |       | 1863                        |                          |                |
|           |           | F05  | 8        | N/A                   | 2139   | 2030  | 4.74  | 1956                        | 1886                     | 3.32           |
|           |           | F04  |          |                       | 1956   |       |       | 1837                        |                          |                |
| TAD 2     |           | G03  |          |                       | 1823   |       |       | 1748                        |                          |                |
|           |           | G05  | 8        | N/A                   | 1870   | 1906  | 5.55  | 1780                        | 1804                     | 3.89           |
|           |           | G04  |          |                       | 2025   |       |       | 1882                        |                          |                |



Plate: Plate\_\*25C4TAE6512\*

| Sample *  | Assay | Well | Dilution | Concentration (pg/ml) | Signal | Mean | CV   | Calc. Concentration (pg/ml) | Calc. Conc. Mean (pg/ml) | Calc. Conc. CV |
|-----------|-------|------|----------|-----------------------|--------|------|------|-----------------------------|--------------------------|----------------|
| TAD 4     |       | F06  | 8        | N/A                   | 2362   | 2216 | 5.77 | 2097                        | 2005                     | 4.04           |
|           |       | F08  |          |                       | 2125   |      |      | 1947                        |                          |                |
|           |       | F07  |          |                       | 2160   |      |      | 1970                        |                          |                |
| TAD 5     |       | G07  | 8        | N/A                   | 1959   | 1927 | 4.84 | 1839                        | 1818                     | 3.42           |
|           |       | G06  |          |                       | 2000   |      |      | 1866                        |                          |                |
|           |       | G08  |          |                       | 1822   |      |      | 1748                        |                          |                |
| TAD 1 tip |       | G10  | 8        | N/A                   | 2026   | 2116 | 4.02 | 1883                        | 1941                     | 2.83           |
|           |       | G11  |          |                       | 2195   |      |      | 1992                        |                          |                |
|           |       | G12  |          |                       | 2126   |      |      | 1948                        |                          |                |
| TCT 1     |       | A11  | 8        | N/A                   | 515    | 553  | 7.49 | 703                         | 741                      | 5.57           |
|           |       | A12  |          |                       | 546    |      |      | 735                         |                          |                |
|           |       | A10  |          |                       | 597    |      |      | 785                         |                          |                |
| TCT 2     |       | B10  | 8        | N/A                   | 598    | 575  | 3.85 | 786                         | 763                      | 2.85           |
|           |       | B11  |          |                       | 572    |      |      | 761                         |                          |                |
|           |       | B12  |          |                       | 554    |      |      | 743                         |                          |                |
| TCT 3     |       | C10  | 8        | N/A                   | 586    | 554  | 5.24 | 774                         | 743                      | 3.89           |
|           |       | C12  |          |                       | 529    |      |      | 718                         |                          |                |
|           |       | C11  |          |                       | 548    |      |      | 737                         |                          |                |
| TCT 4     |       | D11  | 8        | N/A                   | 544    | 526  | 8.4  | 733                         | 714                      | 6.34           |
|           |       | D10  |          |                       | 559    |      |      | 748                         |                          |                |
|           |       | D12  |          |                       | 476    |      |      | 663                         |                          |                |
| TCT 5     |       | E11  | 8        | N/A                   | 542    | 505  | 6.31 | 731                         | 693                      | 4.71           |
|           |       | E10  |          |                       | 490    |      |      | 677                         |                          |                |
|           |       | E12  |          |                       | 484    |      |      | 671                         |                          |                |
| TCT 1 tip |       | H10  | 8        | N/A                   | 519    | 480  | 15.2 | 707                         | 666                      | 11.7           |
|           |       | H11  |          |                       | 525    |      |      | 713                         |                          |                |
|           |       | H12  |          |                       | 396    |      |      | 576                         |                          |                |

**Data Grid Legend**

| Name                          | Abbreviation |
|-------------------------------|--------------|
| Assay                         | A:           |
| Assay Results                 | AR:          |
| Calculated Concentration      | CC:          |
| Calculated Concentration C.V. | CCCV:        |
| Calculated Concentration Mean | CCM:         |
| Calculated Concentration S.D. | CCSD:        |
| Concentrations                | C:           |
| Detection Range               | DR:          |
| Dilutions                     | D:           |
| % Recovery                    | %R:          |
| % Recovery Mean               | %RM:         |
| Sample                        | S:           |
| Sample Group                  | SG:          |
| Signal C.V.                   | CV:          |
| Signal Mean                   | M:           |
| Signal                        | R:           |
| Signal S.D.                   | SD:          |

## Data Grid - Total Tau

|          | 1                               | 2                               | 3                   | 4                   | 5                   | 6                   | 7                   | 8                   | 9     | 10                  | 11                  | 12                  |
|----------|---------------------------------|---------------------------------|---------------------|---------------------|---------------------|---------------------|---------------------|---------------------|-------|---------------------|---------------------|---------------------|
| <b>A</b> | R: 59116<br>C: 3227<br>CC: 3222 | R: 59703<br>C: 3227<br>CC: 3257 | R: 2015<br>CC: 1876 | R: 2126<br>CC: 1948 | R: 1900<br>CC: 1800 | R: 506<br>CC: 694   | R: 475<br>CC: 662   | R: 494<br>CC: 682   | R: 44 | R: 597<br>CC: 785   | R: 515<br>CC: 703   | R: 546<br>CC: 735   |
| <b>B</b> | R: 16352<br>C: 1076<br>CC: 1051 | R: 16819<br>C: 1076<br>CC: 1073 | R: 2082<br>CC: 1920 | R: 2105<br>CC: 1934 | R: 2178<br>CC: 1981 | R: 521<br>CC: 709   | R: 507<br>CC: 695   | R: 492<br>CC: 680   | R: 33 | R: 598<br>CC: 786   | R: 572<br>CC: 761   | R: 554<br>CC: 743   |
| <b>C</b> | R: 3666<br>C: 359<br>CC: 357    | R: 3866<br>C: 359<br>CC: 371    | R: 1917<br>CC: 1811 | R: 2096<br>CC: 1929 | R: 1982<br>CC: 1854 | R: 485<br>CC: 672   | R: 464<br>CC: 650   | R: 478<br>CC: 665   | R: 45 | R: 586<br>CC: 774   | R: 548<br>CC: 737   | R: 529<br>CC: 718   |
| <b>D</b> | R: 758<br>C: 120<br>CC: 117     | R: 823<br>C: 120<br>CC: 124     | R: 1725<br>CC: 1682 | R: 1826<br>CC: 1750 | R: 1962<br>CC: 1841 | R: 445<br>CC: 630   | R: 464<br>CC: 650   | R: 458<br>CC: 644   | R: 33 | R: 559<br>CC: 748   | R: 544<br>CC: 733   | R: 476<br>CC: 663   |
| <b>E</b> | R: 175<br>C: 39.8<br>CC: 36.3   | R: 197<br>C: 39.8<br>CC: 40.5   | R: 1466<br>CC: 1499 | R: 1526<br>CC: 1542 | R: 1441<br>CC: 1481 | R: 339<br>CC: 510   | R: 360<br>CC: 535   | R: 365<br>CC: 541   | R: 38 | R: 490<br>CC: 677   | R: 542<br>CC: 731   | R: 484<br>CC: 671   |
| <b>F</b> | R: 78<br>C: 13.3<br>CC: 13.7    | R: 83<br>C: 13.3<br>CC: 15.2    | R: 1996<br>CC: 1863 | R: 1956<br>CC: 1837 | R: 2139<br>CC: 1956 | R: 2362<br>CC: 2097 | R: 2160<br>CC: 1970 | R: 2125<br>CC: 1947 | R: 35 | R: 428<br>CC: 611   | R: 524<br>CC: 712   | R: 345<br>CC: 517   |
| <b>G</b> | R: 49<br>C: 4.43<br>CC: 1.48    | R: 56<br>C: 4.43<br>CC: 5.63    | R: 1823<br>CC: 1748 | R: 2025<br>CC: 1882 | R: 1870<br>CC: 1780 | R: 2000<br>CC: 1866 | R: 1959<br>CC: 1839 | R: 1822<br>CC: 1748 | R: 40 | R: 2026<br>CC: 1883 | R: 2195<br>CC: 1992 | R: 2126<br>CC: 1948 |
| <b>H</b> | R: 30                           | R: 40                           | R: 1687<br>CC: 1655 | R: 1845<br>CC: 1763 | R: 1770<br>CC: 1712 | R: 1452<br>CC: 1489 | R: 1380<br>CC: 1436 | R: 1017<br>CC: 1156 | R: 36 | R: 519<br>CC: 707   | R: 525<br>CC: 713   | R: 396<br>CC: 576   |

**Standard Data Table**

Plate: Plate\_\*25C4TAE6512\*

Assay: Total Tau

Group: Standard

| Sample * | Well | Concentration (pg/ml) | Signal | Mean  | CV    | Calc. Concentration (pg/ml) | Calc. Conc. Mean (pg/ml) | Calc. Conc. CV |
|----------|------|-----------------------|--------|-------|-------|-----------------------------|--------------------------|----------------|
| S001     | A02  | 3227                  | 59703  | 59410 | 0.699 | 3257                        | 3240                     | 0.766          |
|          | A01  |                       | 59116  |       |       | 3222                        |                          |                |
| S002     | B01  | 1076                  | 16352  | 16586 | 1.99  | 1051                        | 1062                     | 1.51           |
|          | B02  |                       | 16819  |       |       | 1073                        |                          |                |
| S003     | C02  | 359                   | 3866   | 3766  | 3.76  | 371                         | 364                      | 2.64           |
|          | C01  |                       | 3666   |       |       | 357                         |                          |                |
| S004     | D02  | 120                   | 823    | 791   | 5.81  | 124                         | 120                      | 4.22           |
|          | D01  |                       | 758    |       |       | 117                         |                          |                |
| S005     | E01  | 39.8                  | 175    | 186   | 8.36  | 36.3                        | 38.4                     | 7.65           |
|          | E02  |                       | 197    |       |       | 40.5                        |                          |                |
| S006     | F01  | 13.3                  | 78     | 81    | 4.39  | 13.7                        | 14.4                     | 7.35           |
|          | F02  |                       | 83     |       |       | 15.2                        |                          |                |
| S007     | G02  | 4.43                  | 56     | 53    | 9.43  | 5.63                        | 3.55                     | 82.7           |
|          | G01  |                       | 49     |       |       | 1.48                        |                          |                |

## Standard Analysis Properties

| Name                       | Value                                             |
|----------------------------|---------------------------------------------------|
| Algorithm Parameters       |                                                   |
| Initial Top                | 60004                                             |
| Initial Bottom             | 47.2                                              |
| Initial MidPoint           | 1736                                              |
| Initial HillSlope          | 1                                                 |
| Weighting                  | 1/y^2                                             |
| Max Iteration              | 500                                               |
| Fit Statistics             |                                                   |
| RSquared                   | 1                                                 |
| Calculated Parameters      |                                                   |
| Top                        | 155903                                            |
| Bottom                     | 47.9                                              |
| MidPoint                   | 4503                                              |
| HillSlope                  | 1.48                                              |
| Detection Range Parameters |                                                   |
| Low                        | 13.9                                              |
| High                       | 3227                                              |
| Equation                   |                                                   |
| FourPL                     | $y = b_2 + \frac{b_1 - b_2}{1 + (x / b_3)^{b_4}}$ |

## Unknown Data Table

Plate: Plate\_\*25C4TAE6512\*

Assay: Total Tau

Group: Unknown

| Sample *  | Well | Signal | Mean | CV   | Calc. Concentration (pg/ml) | Calc. Conc. Mean (pg/ml) | Calc. Conc. CV |
|-----------|------|--------|------|------|-----------------------------|--------------------------|----------------|
| NAD 1     | A05  | 1900   | 2014 | 5.61 | 1800                        | 1875                     | 3.95           |
|           | A04  | 2126   |      |      | 1948                        |                          |                |
|           | A03  | 2015   |      |      | 1876                        |                          |                |
| NAD 2     | B03  | 2082   | 2122 | 2.36 | 1920                        | 1945                     | 1.66           |
|           | B04  | 2105   |      |      | 1934                        |                          |                |
|           | B05  | 2178   |      |      | 1981                        |                          |                |
| NAD 3     | C03  | 1917   | 1998 | 4.53 | 1811                        | 1865                     | 3.18           |
|           | C05  | 1982   |      |      | 1854                        |                          |                |
|           | C04  | 2096   |      |      | 1929                        |                          |                |
| NAD 4     | D04  | 1826   | 1838 | 6.47 | 1750                        | 1758                     | 4.55           |
|           | D05  | 1962   |      |      | 1841                        |                          |                |
|           | D03  | 1725   |      |      | 1682                        |                          |                |
| NAD 5     | E03  | 1466   | 1478 | 2.96 | 1499                        | 1507                     | 2.09           |
|           | E04  | 1526   |      |      | 1542                        |                          |                |
|           | E05  | 1441   |      |      | 1481                        |                          |                |
| NAD 1 tip | H07  | 1380   | 1283 | 18.2 | 1436                        | 1360                     | 13.2           |
|           | H06  | 1452   |      |      | 1489                        |                          |                |
|           | H08  | 1017   |      |      | 1156                        |                          |                |
| NCT 1     | A06  | 506    | 492  | 3.18 | 694                         | 679                      | 2.4            |
|           | A08  | 494    |      |      | 682                         |                          |                |
|           | A07  | 475    |      |      | 662                         |                          |                |
| NCT 2     | B06  | 521    | 507  | 2.86 | 709                         | 695                      | 2.15           |
|           | B07  | 507    |      |      | 695                         |                          |                |
|           | B08  | 492    |      |      | 680                         |                          |                |
|           | C07  | 464    |      |      | 650                         |                          |                |

Plate: Plate\_\*25C4TAE6512\*

Assay: Total Tau

Group: Unknown

| Sample *  | Well | Signal | Mean | CV   | Calc. Concentration (pg/ml) | Calc. Conc. Mean (pg/ml) | Calc. Conc. CV |
|-----------|------|--------|------|------|-----------------------------|--------------------------|----------------|
| NCT 3     | C08  | 478    | 476  | 2.25 | 665                         | 662                      | 1.7            |
|           | C06  | 485    |      |      | 672                         |                          |                |
| NCT 4     | D07  | 464    | 456  | 2.13 | 650                         | 641                      | 1.62           |
|           | D08  | 458    |      |      | 644                         |                          |                |
|           | D06  | 445    |      |      | 630                         |                          |                |
| NCT 5     | E06  | 339    | 355  | 3.89 | 510                         | 528                      | 3.07           |
|           | E07  | 360    |      |      | 535                         |                          |                |
|           | E08  | 365    |      |      | 541                         |                          |                |
| NCT 1 tip | F10  | 428    | 432  | 20.7 | 611                         | 614                      | 15.9           |
|           | F12  | 345    |      |      | 517                         |                          |                |
|           | F11  | 524    |      |      | 712                         |                          |                |
| TAD3      | H03  | 1687   | 1767 | 4.47 | 1655                        | 1710                     | 3.15           |
|           | H05  | 1770   |      |      | 1712                        |                          |                |
|           | H04  | 1845   |      |      | 1763                        |                          |                |
| TAD 1     | F03  | 1996   | 2030 | 4.74 | 1863                        | 1886                     | 3.32           |
|           | F05  | 2139   |      |      | 1956                        |                          |                |
|           | F04  | 1956   |      |      | 1837                        |                          |                |
| TAD 2     | G03  | 1823   | 1906 | 5.55 | 1748                        | 1804                     | 3.89           |
|           | G05  | 1870   |      |      | 1780                        |                          |                |
|           | G04  | 2025   |      |      | 1882                        |                          |                |
| TAD 4     | F06  | 2362   | 2216 | 5.77 | 2097                        | 2005                     | 4.04           |
|           | F08  | 2125   |      |      | 1947                        |                          |                |
|           | F07  | 2160   |      |      | 1970                        |                          |                |
| TAD 5     | G07  | 1959   | 1927 | 4.84 | 1839                        | 1818                     | 3.42           |
|           | G06  | 2000   |      |      | 1866                        |                          |                |
|           | G08  | 1822   |      |      | 1748                        |                          |                |
|           | G10  | 2026   |      |      | 1883                        |                          |                |

Plate: Plate\_\*25C4TAE6512\*

Assay: Total Tau

Group: Unknown

| Sample *  | Well | Signal | Mean | CV   | Calc. Concentration (pg/ml) | Calc. Conc. Mean (pg/ml) | Calc. Conc. CV |
|-----------|------|--------|------|------|-----------------------------|--------------------------|----------------|
| TAD 1 tip | G11  | 2195   | 2116 | 4.02 | 1992                        | 1941                     | 2.83           |
|           | G12  | 2126   |      |      | 1948                        |                          |                |
| TCT 1     | A11  | 515    | 553  | 7.49 | 703                         | 741                      | 5.57           |
|           | A12  | 546    |      |      | 735                         |                          |                |
|           | A10  | 597    |      |      | 785                         |                          |                |
| TCT 2     | B10  | 598    | 575  | 3.85 | 786                         | 763                      | 2.85           |
|           | B11  | 572    |      |      | 761                         |                          |                |
|           | B12  | 554    |      |      | 743                         |                          |                |
| TCT 3     | C10  | 586    | 554  | 5.24 | 774                         | 743                      | 3.89           |
|           | C12  | 529    |      |      | 718                         |                          |                |
|           | C11  | 548    |      |      | 737                         |                          |                |
| TCT 4     | D11  | 544    | 526  | 8.4  | 733                         | 714                      | 6.34           |
|           | D10  | 559    |      |      | 748                         |                          |                |
|           | D12  | 476    |      |      | 663                         |                          |                |
| TCT 5     | E11  | 542    | 505  | 6.31 | 731                         | 693                      | 4.71           |
|           | E10  | 490    |      |      | 677                         |                          |                |
|           | E12  | 484    |      |      | 671                         |                          |                |
| TCT 1 tip | H10  | 519    | 480  | 15.2 | 707                         | 666                      | 11.7           |
|           | H11  | 525    |      |      | 713                         |                          |                |
|           | H12  | 396    |      |      | 576                         |                          |                |



**Blank Data Table**

Plate: Plate\_\*25C4TAE6512\*

Assay: Total Tau

Group: Blank

| Sample * | Well | Signal | Mean | CV   |
|----------|------|--------|------|------|
| B001     | H01  | 30     | 35   | 20.2 |
|          | H02  | 40     |      |      |
| B002     | F09  | 35     | 38   | 12.3 |
|          | D09  | 33     |      |      |
|          | H09  | 36     |      |      |
|          | B09  | 33     |      |      |
|          | C09  | 45     |      |      |
|          | E09  | 38     |      |      |
|          | A09  | 44     |      |      |
|          | G09  | 40     |      |      |

Plot: Standard

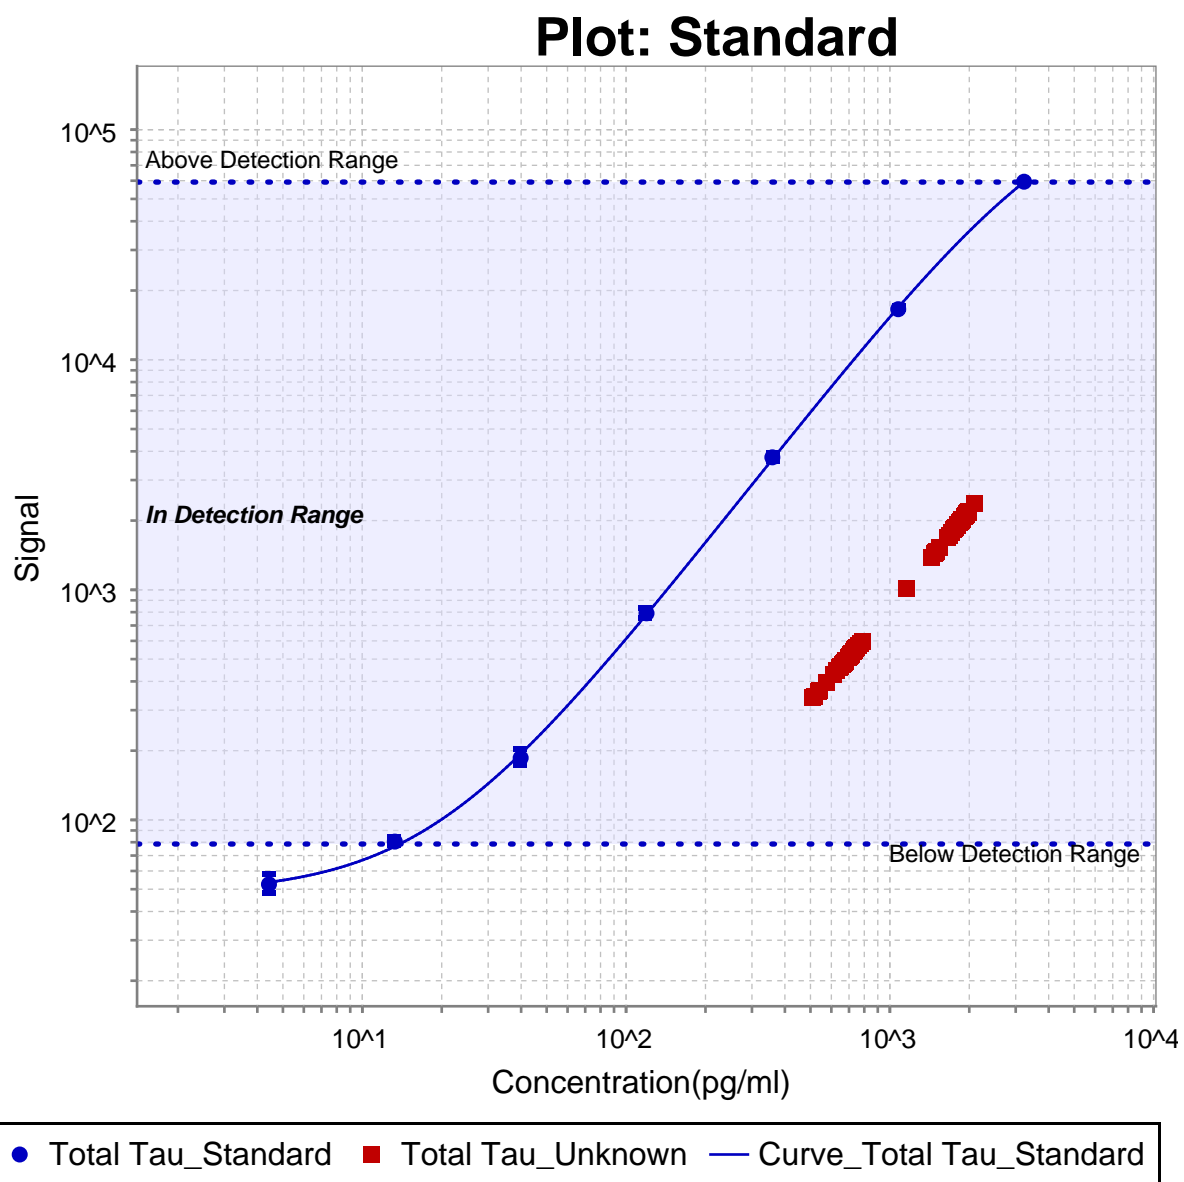

Supplement: alzrt236-S2.pdf [file alzrt236-S2.pdf]
