# Supplementary material for: Amyloid-beta 42 adsorption following serial tube transfer
Source: PubMed Central journal article supplement (PMC4059346; doi:10.1186/alzrt236), 2014-01-28

## Report Properties

Title: Experiment\_20131030160523

Author: Administrator

Creator: Administrator

Report Date: 30-Oct-2013

## Notes

**Plate Properties**

| Name           | Value                   |
|----------------|-------------------------|
| User           | Administrator           |
| Read Time      | 10/30/2013 15:27:18 GMT |
| Det Param      | Standard                |
| Type           | 96 Multi-Spot 4         |
| Wells Per Row  | 12                      |
| Wells Per Col  | 8                       |
| Spots Per Well | 4                       |
| Stack ID       | 0                       |
| Barcode1       | *25BB5AL219Y*           |
| Barcode2       | N/A                     |
| Barcode3       | N/A                     |
| Plate #        | 1277                    |
| Model          | IPR                     |
| Serial #       | 1200120302692           |
| Version        | MSD_3_0_18              |
| Orient         | 0                       |
| Comments       |                         |

**20131030\_WTBioM07.2\_Ab - Assay Assignment**

Spot : &lt;a1&gt; &lt;a2&gt;

Legend : &lt;b1&gt; &lt;b2&gt;

| Assay Assignment |            |
|------------------|------------|
| Spot ID          | Assay Name |
| 1                | Abeta 1-42 |
| 2                |            |
| 3                |            |
| 4                |            |

**20131030\_WTBioM07.2\_Ab - Group Association**

| Group Association |            |                |       |
|-------------------|------------|----------------|-------|
| Assay Name        | Group Name | Back Fit Curve | Blank |
| Abeta 1-42        | Unknown    | Standard       |       |

| Group Association |            |                |       |
|-------------------|------------|----------------|-------|
| Assay Name        | Group Name | Back Fit Curve | Blank |
| Abeta 1-42        | Standard   | -              |       |
| Abeta 1-42        | Control    | Standard       |       |

## 20131030\_WTBioM07.2\_Ab - Sample Definition

|          | 1                    | 2                    | 3                           | 4                           | 5                   | 6                   | 7                   | 8                   | 9                   | 10                  | 11                           | 12                           |
|----------|----------------------|----------------------|-----------------------------|-----------------------------|---------------------|---------------------|---------------------|---------------------|---------------------|---------------------|------------------------------|------------------------------|
| <b>A</b> | S001<br>Standar<br>d | S001<br>Standar<br>d | Control<br>1<br>Unkno<br>wn | Control<br>1<br>Unkno<br>wn | U008<br>Unkno<br>wn | U008<br>Unkno<br>wn | U016<br>Unkno<br>wn | U016<br>Unkno<br>wn | U024<br>Unkno<br>wn | U024<br>Unkno<br>wn | U032<br>Unkno<br>wn          | U032<br>Unkno<br>wn          |
| <b>B</b> | S002<br>Standar<br>d | S002<br>Standar<br>d | U001<br>Unkno<br>wn         | U001<br>Unkno<br>wn         | U009<br>Unkno<br>wn | U009<br>Unkno<br>wn | U017<br>Unkno<br>wn | U017<br>Unkno<br>wn | U025<br>Unkno<br>wn | U025<br>Unkno<br>wn | NCT1<br>Alpha<br>Unkno<br>wn | NCT1<br>Alpha<br>Unkno<br>wn |
| <b>C</b> | S003<br>Standar<br>d | S003<br>Standar<br>d | U002<br>Unkno<br>wn         | U002<br>Unkno<br>wn         | U010<br>Unkno<br>wn | U010<br>Unkno<br>wn | U018<br>Unkno<br>wn | U018<br>Unkno<br>wn | U026<br>Unkno<br>wn | U026<br>Unkno<br>wn | STD 2<br>Control             | STD 2<br>Control             |
| <b>D</b> | S004<br>Standar<br>d | S004<br>Standar<br>d | U003<br>Unkno<br>wn         | U003<br>Unkno<br>wn         | U011<br>Unkno<br>wn | U011<br>Unkno<br>wn | U019<br>Unkno<br>wn | U019<br>Unkno<br>wn | U027<br>Unkno<br>wn | U027<br>Unkno<br>wn | STD 3<br>Control             | STD 3<br>Control             |
| <b>E</b> | S005<br>Standar<br>d | S005<br>Standar<br>d | U004<br>Unkno<br>wn         | U004<br>Unkno<br>wn         | U012<br>Unkno<br>wn | U012<br>Unkno<br>wn | U020<br>Unkno<br>wn | U020<br>Unkno<br>wn | U028<br>Unkno<br>wn | U028<br>Unkno<br>wn | STD 4<br>Control             | STD 4<br>Control             |
| <b>F</b> | S006<br>Standar<br>d | S006<br>Standar<br>d | U005<br>Unkno<br>wn         | U005<br>Unkno<br>wn         | U013<br>Unkno<br>wn | U013<br>Unkno<br>wn | U021<br>Unkno<br>wn | U021<br>Unkno<br>wn | U029<br>Unkno<br>wn | U029<br>Unkno<br>wn | STD 5<br>Control             | STD 5<br>Control             |
| <b>G</b> | S007<br>Standar<br>d | S007<br>Standar<br>d | U006<br>Unkno<br>wn         | U006<br>Unkno<br>wn         | U014<br>Unkno<br>wn | U014<br>Unkno<br>wn | U022<br>Unkno<br>wn | U022<br>Unkno<br>wn | U030<br>Unkno<br>wn | U030<br>Unkno<br>wn | NAD1<br>Alpha<br>Unkno<br>wn | NAD1<br>Alpha<br>Unkno<br>wn |
| <b>H</b> | B001<br>Blank        | B001<br>Blank        | U007<br>Unkno<br>wn         | U007<br>Unkno<br>wn         | U015<br>Unkno<br>wn | U015<br>Unkno<br>wn | U023<br>Unkno<br>wn | U023<br>Unkno<br>wn | U031<br>Unkno<br>wn | U031<br>Unkno<br>wn | Control<br>2<br>Unkno<br>wn  | Control<br>2<br>Unkno<br>wn  |

**20131030\_WTBioM07.2\_Ab - Abeta 1-42's Concentration/Dilution  
Definition**

|   | 1     | 2     | 3 | 4 | 5 | 6 | 7 | 8 | 9 | 10 | 11   | 12   |
|---|-------|-------|---|---|---|---|---|---|---|----|------|------|
| A | 775   | 775   | 8 | 8 | 8 | 8 | 8 | 8 | 8 | 8  | 8    | 8    |
| B | 194   | 194   | 8 | 8 | 8 | 8 | 8 | 8 | 8 | 8  | 8    | 8    |
| C | 48.4  | 48.4  | 8 | 8 | 8 | 8 | 8 | 8 | 8 | 8  | 194  | 194  |
| D | 12.1  | 12.1  | 8 | 8 | 8 | 8 | 8 | 8 | 8 | 8  | 48.4 | 48.4 |
| E | 3.03  | 3.03  | 8 | 8 | 8 | 8 | 8 | 8 | 8 | 8  | 12.1 | 12.1 |
| F | 0.757 | 0.757 | 8 | 8 | 8 | 8 | 8 | 8 | 8 | 8  | 3.03 | 3.03 |
| G | 0.189 | 0.189 | 8 | 8 | 8 | 8 | 8 | 8 | 8 | 8  | 8    | 8    |
| H |       |       | 8 | 8 | 8 | 8 | 8 | 8 | 8 | 8  | 8    | 8    |

## Plate Data Table

Plate: Plate\_\*25BB5AL219Y\*

| Sample *   | Assay | Well | Dilution | Concentration (pg/ml) | Signal     | Mean       | CV    | Calc. Concentration (pg/ml) | Calc. Conc. Mean (pg/ml) | Calc. Conc. CV |
|------------|-------|------|----------|-----------------------|------------|------------|-------|-----------------------------|--------------------------|----------------|
| B001       |       | H01  | N/A      | N/A                   | 119        | 118        | 1.2   | N/A                         | N/A                      | N/A            |
|            |       | H02  |          |                       | 117        |            |       | N/A                         |                          |                |
| Control 1  |       | A04  | 8        | N/A                   | 6493       | 6510       | 0.358 | 309                         | 310                      | 0.27           |
|            |       | A03  |          |                       | 6526       |            |       | 311                         |                          |                |
| Control 2  |       | H11  | 8        | N/A                   | 6312       | 6210       | 2.32  | 303                         | 299                      | 1.75           |
|            |       | H12  |          |                       | 6108       |            |       | 295                         |                          |                |
| NAD1 Alpha |       | G11  | 8        | N/A                   | 6340       | 6876       | 11    | 304                         | 323                      | 8.29           |
|            |       | G12  |          |                       | 7412       |            |       | 342                         |                          |                |
| NCT1 Alpha |       | B11  | 8        | N/A                   | 7226       | 6653       | 12.2  | 335                         | 315                      | 9.17           |
|            |       | B12  |          |                       | 6080       |            |       | 294                         |                          |                |
| S001       |       | A02  | N/A      | 775                   | 29173<br>3 | 28905<br>4 | 1.31  | 777                         | 770                      | 1.26           |
|            |       | A01  |          |                       | 28637<br>4 |            |       | 763                         |                          |                |
| S002       |       | B01  | N/A      | 194                   | 59115      | 57656      | 3.58  | 204                         | 200                      | 2.76           |
|            |       | B02  |          |                       | 56197      |            |       | 196                         |                          |                |
| S003       |       | C02  | N/A      | 48.4                  | 8051       | 8598       | 8.99  | 45.4                        | 47.7                     | 6.74           |
|            |       | C01  |          |                       | 9144       |            |       | 50                          |                          |                |
| S004       |       | D02  | N/A      | 12.1                  | 1336       | 1365       | 3     | 11.4                        | 11.6                     | 2.44           |
|            |       | D01  |          |                       | 1394       |            |       | 11.8                        |                          |                |
| S005       |       | E01  | N/A      | 3.03                  | 354        | 357        | 0.992 | 3.27                        | 3.3                      | 1.17           |
|            |       | E02  |          |                       | 359        |            |       | 3.33                        |                          |                |
| S006       |       | F01  | N/A      | 0.757                 | 168        | 168        | 0     | 0.825                       | 0.825                    | 0              |
|            |       | F02  |          |                       | 168        |            |       | 0.825                       |                          |                |
| S007       |       | G02  | N/A      | 0.189                 | 142        | 134        | 8.44  | 0.274                       | 0.137                    | 141            |

Plate: Plate\_\*25BB5AL219Y\*

| Sample * | Assay      | Well | Dilution | Concentration (pg/ml) | Signal | Mean  | CV    | Calc. Concentration (pg/ml) | Calc. Conc. Mean (pg/ml) | Calc. Conc. CV |
|----------|------------|------|----------|-----------------------|--------|-------|-------|-----------------------------|--------------------------|----------------|
|          |            | G01  |          |                       | 126    |       |       | 0                           |                          |                |
| STD 2    |            | C11  | N/A      | 194                   | 6728   | 6307  | 9.44  | 39.7                        | 37.8                     | 7.11           |
|          |            | C12  |          |                       | 5886   |       |       | 35.9                        |                          |                |
| STD 3    |            | D11  | N/A      | 48.4                  | 1166   | 1123  | 5.42  | 10.2                        | 9.86                     | 4.51           |
|          |            | D12  |          |                       | 1080   |       |       | 9.54                        |                          |                |
| STD 4    |            | E12  | N/A      | 12.1                  | 332    | 350   | 7.08  | 3.03                        | 3.22                     | 8.44           |
|          |            | E11  |          |                       | 367    |       |       | 3.41                        |                          |                |
| STD 5    |            | F11  | N/A      | 3.03                  | 170    | 171   | 0.415 | 0.861                       | 0.869                    | 1.44           |
|          |            | F12  |          |                       | 171    |       |       | 0.878                       |                          |                |
| U001     |            | B03  | 8        | N/A                   | 6382   | 6497  | 2.49  | 305                         | 309                      | 1.87           |
|          |            | B04  |          |                       | 6611   |       |       | 314                         |                          |                |
| U002     |            | C03  | 8        | N/A                   | 3387   | 3556  | 6.7   | 189                         | 196                      | 5.12           |
|          |            | C04  |          |                       | 3724   |       |       | 203                         |                          |                |
| U003     |            | D04  | 8        | N/A                   | 4941   | 4630  | 9.5   | 252                         | 240                      | 7.2            |
|          |            | D03  |          |                       | 4319   |       |       | 227                         |                          |                |
| U004     |            | E03  | 8        | N/A                   | 2236   | 2415  | 10.5  | 137                         | 145                      | 8.13           |
|          |            | E04  |          |                       | 2593   |       |       | 154                         |                          |                |
| U005     |            | F03  | 8        | N/A                   | 1506   | 1486  | 1.9   | 100                         | 99.2                     | 1.53           |
|          |            | F04  |          |                       | 1466   |       |       | 98.1                        |                          |                |
| U006     |            | G03  | 8        | N/A                   | 1279   | 1290  | 1.15  | 87.8                        | 88.4                     | 0.943          |
|          |            | G04  |          |                       | 1300   |       |       | 89                          |                          |                |
| U007     |            | H03  | 8        | N/A                   | 938    | 930   | 1.29  | 67.8                        | 67.2                     | 1.11           |
|          |            | H04  |          |                       | 921    |       |       | 66.7                        |                          |                |
| U008     | Abeta 1-42 | A06  | 8        | N/A                   | 10138  | 10186 | 0.666 | 432                         | 434                      | 0.499          |
|          |            | A05  |          |                       | 10234  |       |       | 435                         |                          |                |
| U009     |            | B06  | 8        | N/A                   | 13302  | 13191 | 1.2   | 529                         | 526                      | 0.894          |
|          |            | B05  |          |                       | 13079  |       |       | 523                         |                          |                |

Plate: Plate\_\*25BB5AL219Y\*

| Sample * | Assay | Well | Dilution | Concentration (pg/ml) | Signal | Mean  | CV   | Calc. Concentration (pg/ml) | Calc. Conc. Mean (pg/ml) | Calc. Conc. CV |
|----------|-------|------|----------|-----------------------|--------|-------|------|-----------------------------|--------------------------|----------------|
| U010     |       | C05  | 8        | N/A                   | 4950   | 5422  | 12.3 | 252                         | 270                      | 9.29           |
|          |       | C06  |          |                       | 5893   |       |      | 288                         |                          |                |
| U011     |       | D05  | 8        | N/A                   | 7954   | 7741  | 3.9  | 360                         | 353                      | 2.93           |
|          |       | D06  |          |                       | 7527   |       |      | 346                         |                          |                |
| U012     |       | E06  | 8        | N/A                   | 815    | 717   | 19.4 | 60                          | 53.3                     | 17.6           |
|          |       | E05  |          |                       | 618    |       |      | 46.7                        |                          |                |
| U013     |       | F06  | 8        | N/A                   | 6179   | 5909  | 6.47 | 298                         | 288                      | 4.88           |
|          |       | F05  |          |                       | 5638   |       |      | 278                         |                          |                |
| U014     |       | G06  | 8        | N/A                   | 2496   | 2374  | 7.3  | 149                         | 144                      | 5.68           |
|          |       | G05  |          |                       | 2251   |       |      | 138                         |                          |                |
| U015     |       | H06  | 8        | N/A                   | 1229   | 1163  | 8.03 | 85                          | 81.2                     | 6.66           |
|          |       | H05  |          |                       | 1097   |       |      | 77.3                        |                          |                |
| U016     |       | A08  | 8        | N/A                   | 1012   | 1035  | 3.08 | 72.3                        | 73.6                     | 2.59           |
|          |       | A07  |          |                       | 1057   |       |      | 75                          |                          |                |
| U017     |       | B07  | 8        | N/A                   | 9271   | 8582  | 11.4 | 404                         | 381                      | 8.52           |
|          |       | B08  |          |                       | 7892   |       |      | 358                         |                          |                |
| U018     |       | C07  | 8        | N/A                   | 11110  | 12693 | 17.6 | 463                         | 510                      | 13.2           |
|          |       | C08  |          |                       | 14275  |       |      | 558                         |                          |                |
| U019     |       | D07  | 8        | N/A                   | 6129   | 5905  | 5.36 | 296                         | 288                      | 4.04           |
|          |       | D08  |          |                       | 5681   |       |      | 280                         |                          |                |
| U020     |       | E07  | 8        | N/A                   | 1630   | 1768  | 11   | 107                         | 114                      | 8.74           |
|          |       | E08  |          |                       | 1905   |       |      | 121                         |                          |                |
| U021     |       | F08  | 8        | N/A                   | 10889  | 10718 | 2.26 | 456                         | 450                      | 1.69           |
|          |       | F07  |          |                       | 10547  |       |      | 445                         |                          |                |
| U022     |       | G07  | 8        | N/A                   | 6549   | 6865  | 6.5  | 311                         | 322                      | 4.88           |
|          |       | G08  |          |                       | 7180   |       |      | 334                         |                          |                |
| U023     |       | H07  | 8        | N/A                   | 12256  | 13175 | 9.86 | 498                         | 525                      | 7.38           |



Plate: Plate\_\*25BB5AL219Y\*

| Sample * | Assay | Well | Dilution | Concentration (pg/ml) | Signal | Mean  | CV    | Calc. Concentration (pg/ml) | Calc. Conc. Mean (pg/ml) | Calc. Conc. CV |
|----------|-------|------|----------|-----------------------|--------|-------|-------|-----------------------------|--------------------------|----------------|
|          |       | H08  |          |                       | 14093  |       |       | 553                         |                          |                |
| U024     |       | A09  | 8        | N/A                   | 5652   | 5649  | 0.088 | 279                         | 279                      | 0.066          |
|          |       | A10  |          |                       | 5645   |       |       | 278                         |                          |                |
| U025     |       | B10  | 8        | N/A                   | 4754   | 4696  | 1.75  | 245                         | 242                      | 1.32           |
|          |       | B09  |          |                       | 4638   |       |       | 240                         |                          |                |
| U026     |       | C10  | 8        | N/A                   | 12727  | 13566 | 8.74  | 512                         | 537                      | 6.54           |
|          |       | C09  |          |                       | 14404  |       |       | 562                         |                          |                |
| U027     |       | D10  | 8        | N/A                   | 2778   | 2697  | 4.25  | 162                         | 159                      | 3.28           |
|          |       | D09  |          |                       | 2616   |       |       | 155                         |                          |                |
| U028     |       | E10  | 8        | N/A                   | 13371  | 11418 | 24.2  | 531                         | 471                      | 18.2           |
|          |       | E09  |          |                       | 9464   |       |       | 410                         |                          |                |
| U029     |       | F10  | 8        | N/A                   | 9199   | 8576  | 10.3  | 402                         | 381                      | 7.71           |
|          |       | F09  |          |                       | 7952   |       |       | 360                         |                          |                |
| U030     |       | G10  | 8        | N/A                   | 3147   | 2808  | 17.1  | 179                         | 163                      | 13.2           |
|          |       | G09  |          |                       | 2468   |       |       | 148                         |                          |                |
| U031     |       | H10  | 8        | N/A                   | 9743   | 9528  | 3.2   | 419                         | 412                      | 2.4            |
|          |       | H09  |          |                       | 9312   |       |       | 405                         |                          |                |
| U032     |       | A11  | 8        | N/A                   | 3315   | 3051  | 12.3  | 186                         | 174                      | 9.43           |
|          |       | A12  |          |                       | 2786   |       |       | 163                         |                          |                |

**Data Grid Legend**

| Name                          | Abbreviation |
|-------------------------------|--------------|
| Assay                         | A:           |
| Assay Results                 | AR:          |
| Calculated Concentration      | CC:          |
| Calculated Concentration C.V. | CCCV:        |
| Calculated Concentration Mean | CCM:         |
| Calculated Concentration S.D. | CCSD:        |
| Concentrations                | C:           |
| Detection Range               | DR:          |
| Dilutions                     | D:           |
| % Recovery                    | %R:          |
| % Recovery Mean               | %RM:         |
| Sample                        | S:           |
| Sample Group                  | SG:          |
| Signal C.V.                   | CV:          |
| Signal Mean                   | M:           |
| Signal                        | R:           |
| Signal S.D.                   | SD:          |

## Data Grid - Abeta 1-42

|          | 1                               | 2                               | 3                   | 4                   | 5                   | 6                   | 7                   | 8                   | 9                   | 10                  | 11                             | 12                             |
|----------|---------------------------------|---------------------------------|---------------------|---------------------|---------------------|---------------------|---------------------|---------------------|---------------------|---------------------|--------------------------------|--------------------------------|
| <b>A</b> | R: 286374<br>C: 775<br>CC: 763  | R: 291733<br>C: 775<br>CC: 777  | R: 6526<br>CC: 311  | R: 6493<br>CC: 309  | R: 10234<br>CC: 435 | R: 10138<br>CC: 432 | R: 1057<br>CC: 75   | R: 1012<br>CC: 72.3 | R: 5652<br>CC: 279  | R: 5645<br>CC: 278  | R: 3315<br>CC: 186             | R: 2786<br>CC: 163             |
| <b>B</b> | R: 59115<br>C: 194<br>CC: 204   | R: 56197<br>C: 194<br>CC: 196   | R: 6382<br>CC: 305  | R: 6611<br>CC: 314  | R: 13079<br>CC: 523 | R: 13302<br>CC: 529 | R: 9271<br>CC: 404  | R: 7892<br>CC: 358  | R: 4638<br>CC: 240  | R: 4754<br>CC: 245  | R: 7226<br>CC: 335             | R: 6080<br>CC: 294             |
| <b>C</b> | R: 9144<br>C: 48.4<br>CC: 50    | R: 8051<br>C: 48.4<br>CC: 45.4  | R: 3387<br>CC: 189  | R: 3724<br>CC: 203  | R: 4950<br>CC: 252  | R: 5893<br>CC: 288  | R: 11110<br>CC: 463 | R: 14275<br>CC: 558 | R: 14404<br>CC: 562 | R: 12727<br>CC: 512 | R: 6728<br>C: 194<br>CC: 39.7  | R: 5886<br>C: 194<br>CC: 35.9  |
| <b>D</b> | R: 1394<br>C: 12.1<br>CC: 11.8  | R: 1336<br>C: 12.1<br>CC: 11.4  | R: 4319<br>CC: 227  | R: 4941<br>CC: 252  | R: 7954<br>CC: 360  | R: 7527<br>CC: 346  | R: 6129<br>CC: 296  | R: 5681<br>CC: 280  | R: 2616<br>CC: 155  | R: 2778<br>CC: 162  | R: 1166<br>C: 48.4<br>CC: 10.2 | R: 1080<br>C: 48.4<br>CC: 9.54 |
| <b>E</b> | R: 354<br>C: 3.03<br>CC: 3.27   | R: 359<br>C: 3.03<br>CC: 3.33   | R: 2236<br>CC: 137  | R: 2593<br>CC: 154  | R: 618<br>CC: 46.7  | R: 815<br>CC: 60    | R: 1630<br>CC: 107  | R: 1905<br>CC: 121  | R: 9464<br>CC: 410  | R: 13371<br>CC: 531 | R: 367<br>C: 12.1<br>CC: 3.41  | R: 332<br>C: 12.1<br>CC: 3.03  |
| <b>F</b> | R: 168<br>C: 0.757<br>CC: 0.825 | R: 168<br>C: 0.757<br>CC: 0.825 | R: 1506<br>CC: 100  | R: 1466<br>CC: 98.1 | R: 5638<br>CC: 278  | R: 6179<br>CC: 298  | R: 10547<br>CC: 445 | R: 10889<br>CC: 456 | R: 7952<br>CC: 360  | R: 9199<br>CC: 402  | R: 170<br>C: 3.03<br>CC: 0.861 | R: 171<br>C: 3.03<br>CC: 0.878 |
| <b>G</b> | R: 126<br>C: 0.189<br>CC: 0     | R: 142<br>C: 0.189<br>CC: 0.274 | R: 1279<br>CC: 87.8 | R: 1300<br>CC: 89   | R: 2251<br>CC: 138  | R: 2496<br>CC: 149  | R: 6549<br>CC: 311  | R: 7180<br>CC: 334  | R: 2468<br>CC: 148  | R: 3147<br>CC: 179  | R: 6340<br>CC: 304             | R: 7412<br>CC: 342             |
| <b>H</b> | R: 119                          | R: 117                          | R: 938<br>CC: 67.8  | R: 921<br>CC: 66.7  | R: 1097<br>CC: 77.3 | R: 1229<br>CC: 85   | R: 12256<br>CC: 498 | R: 14093<br>CC: 553 | R: 9312<br>CC: 405  | R: 9743<br>CC: 419  | R: 6312<br>CC: 303             | R: 6108<br>CC: 295             |

## Standard Data Table

Plate: Plate\_\*25BB5AL219Y\*

Assay: Abeta 1-42

Group: Standard

| Sample # | Well | Concentration (pg/ml) | Signal | Mean   | CV    | Calc. Concentration (pg/ml) | Calc. Conc. Mean (pg/ml) | Calc. Conc. CV |
|----------|------|-----------------------|--------|--------|-------|-----------------------------|--------------------------|----------------|
| S001     | A02  | 775                   | 291733 | 289054 | 1.31  | 777                         | 770                      | 1.26           |
|          | A01  |                       | 286374 |        |       | 763                         |                          |                |
| S002     | B01  | 194                   | 59115  | 57656  | 3.58  | 204                         | 200                      | 2.76           |
|          | B02  |                       | 56197  |        |       | 196                         |                          |                |
| S003     | C02  | 48.4                  | 8051   | 8598   | 8.99  | 45.4                        | 47.7                     | 6.74           |
|          | C01  |                       | 9144   |        |       | 50                          |                          |                |
| S004     | D02  | 12.1                  | 1336   | 1365   | 3     | 11.4                        | 11.6                     | 2.44           |
|          | D01  |                       | 1394   |        |       | 11.8                        |                          |                |
| S005     | E01  | 3.03                  | 354    | 357    | 0.992 | 3.27                        | 3.3                      | 1.17           |
|          | E02  |                       | 359    |        |       | 3.33                        |                          |                |
| S006     | F01  | 0.757                 | 168    | 168    | 0     | 0.825                       | 0.825                    | 0              |
|          | F02  |                       | 168    |        |       | 0.825                       |                          |                |
| S007     | G02  | 0.189                 | 142    | 134    | 8.44  | 0.274                       | 0.137                    | 141            |
|          | G01  |                       | 126    |        |       | 0                           |                          |                |

## Standard Analysis Properties

| Name                       | Value                                             |
|----------------------------|---------------------------------------------------|
| Algorithm Parameters       |                                                   |
| Initial Top                | 291944                                            |
| Initial Bottom             | 121                                               |
| Initial MidPoint           | 412                                               |
| Initial HillSlope          | 1                                                 |
| Weighting                  | 1/y^2                                             |
| Max Iteration              | 500                                               |
| Fit Statistics             |                                                   |
| RSquared                   | 1                                                 |
| Calculated Parameters      |                                                   |
| Top                        | 1210299                                           |
| Bottom                     | 135                                               |
| MidPoint                   | 1800                                              |
| HillSlope                  | 1.37                                              |
| Detection Range Parameters |                                                   |
| Low                        | 0.813                                             |
| High                       | 775                                               |
| Equation                   |                                                   |
| FourPL                     | $y = b_2 + \frac{b_1 - b_2}{1 + (x / b_3)^{b_4}}$ |

## Unknown Data Table

Plate: Plate\_\*25BB5AL219Y\*

Assay: Abeta 1-42

Group: Unknown

| Sample #   | Well | Signal | Mean  | CV    | Calc. Concentration (pg/ml) | Calc. Conc. Mean (pg/ml) | Calc. Conc. CV |
|------------|------|--------|-------|-------|-----------------------------|--------------------------|----------------|
| Control 1  | A04  | 6493   | 6510  | 0.358 | 309                         | 310                      | 0.27           |
|            | A03  | 6526   |       |       | 311                         |                          |                |
| Control 2  | H11  | 6312   | 6210  | 2.32  | 303                         | 299                      | 1.75           |
|            | H12  | 6108   |       |       | 295                         |                          |                |
| NAD1 Alpha | G11  | 6340   | 6876  | 11    | 304                         | 323                      | 8.29           |
|            | G12  | 7412   |       |       | 342                         |                          |                |
| NCT1 Alpha | B11  | 7226   | 6653  | 12.2  | 335                         | 315                      | 9.17           |
|            | B12  | 6080   |       |       | 294                         |                          |                |
| U001       | B03  | 6382   | 6497  | 2.49  | 305                         | 309                      | 1.87           |
|            | B04  | 6611   |       |       | 314                         |                          |                |
| U002       | C03  | 3387   | 3556  | 6.7   | 189                         | 196                      | 5.12           |
|            | C04  | 3724   |       |       | 203                         |                          |                |
| U003       | D04  | 4941   | 4630  | 9.5   | 252                         | 240                      | 7.2            |
|            | D03  | 4319   |       |       | 227                         |                          |                |
| U004       | E03  | 2236   | 2415  | 10.5  | 137                         | 145                      | 8.13           |
|            | E04  | 2593   |       |       | 154                         |                          |                |
| U005       | F03  | 1506   | 1486  | 1.9   | 100                         | 99.2                     | 1.53           |
|            | F04  | 1466   |       |       | 98.1                        |                          |                |
| U006       | G03  | 1279   | 1290  | 1.15  | 87.8                        | 88.4                     | 0.943          |
|            | G04  | 1300   |       |       | 89                          |                          |                |
| U007       | H03  | 938    | 930   | 1.29  | 67.8                        | 67.2                     | 1.11           |
|            | H04  | 921    |       |       | 66.7                        |                          |                |
| U008       | A06  | 10138  | 10186 | 0.666 | 432                         | 434                      | 0.499          |
|            | A05  | 10234  |       |       | 435                         |                          |                |
| U009       | B06  | 13302  | 13191 | 1.2   | 529                         | 526                      | 0.894          |

Plate: Plate\_\*25BB5AL219Y\*

Assay: Abeta 1-42

Group: Unknown

| Sample # | Well | Signal | Mean  | CV   | Calc. Concentration (pg/ml) | Calc. Conc. Mean (pg/ml) | Calc. Conc. CV |
|----------|------|--------|-------|------|-----------------------------|--------------------------|----------------|
|          | B05  | 13079  |       |      | 523                         |                          |                |
| U010     | C05  | 4950   | 5422  | 12.3 | 252                         | 270                      | 9.29           |
|          | C06  | 5893   |       |      | 288                         |                          |                |
| U011     | D05  | 7954   | 7741  | 3.9  | 360                         | 353                      | 2.93           |
|          | D06  | 7527   |       |      | 346                         |                          |                |
| U012     | E06  | 815    | 717   | 19.4 | 60                          | 53.3                     | 17.6           |
|          | E05  | 618    |       |      | 46.7                        |                          |                |
| U013     | F06  | 6179   | 5909  | 6.47 | 298                         | 288                      | 4.88           |
|          | F05  | 5638   |       |      | 278                         |                          |                |
| U014     | G06  | 2496   | 2374  | 7.3  | 149                         | 144                      | 5.68           |
|          | G05  | 2251   |       |      | 138                         |                          |                |
| U015     | H06  | 1229   | 1163  | 8.03 | 85                          | 81.2                     | 6.66           |
|          | H05  | 1097   |       |      | 77.3                        |                          |                |
| U016     | A08  | 1012   | 1035  | 3.08 | 72.3                        | 73.6                     | 2.59           |
|          | A07  | 1057   |       |      | 75                          |                          |                |
| U017     | B07  | 9271   | 8582  | 11.4 | 404                         | 381                      | 8.52           |
|          | B08  | 7892   |       |      | 358                         |                          |                |
| U018     | C07  | 11110  | 12693 | 17.6 | 463                         | 510                      | 13.2           |
|          | C08  | 14275  |       |      | 558                         |                          |                |
| U019     | D07  | 6129   | 5905  | 5.36 | 296                         | 288                      | 4.04           |
|          | D08  | 5681   |       |      | 280                         |                          |                |
| U020     | E07  | 1630   | 1768  | 11   | 107                         | 114                      | 8.74           |
|          | E08  | 1905   |       |      | 121                         |                          |                |
| U021     | F08  | 10889  | 10718 | 2.26 | 456                         | 450                      | 1.69           |
|          | F07  | 10547  |       |      | 445                         |                          |                |
| U022     | G07  | 6549   | 6865  | 6.5  | 311                         | 322                      | 4.88           |
|          | G08  | 7180   |       |      | 334                         |                          |                |

Plate: Plate\_\*25BB5AL219Y\*

Assay: Abeta 1-42

Group: Unknown

| Sample # | Well | Signal | Mean  | CV    | Calc. Concentration (pg/ml) | Calc. Conc. Mean (pg/ml) | Calc. Conc. CV |
|----------|------|--------|-------|-------|-----------------------------|--------------------------|----------------|
| U023     | H07  | 12256  | 13175 | 9.86  | 498                         | 525                      | 7.38           |
|          | H08  | 14093  |       |       | 553                         |                          |                |
| U024     | A09  | 5652   | 5649  | 0.088 | 279                         | 279                      | 0.066          |
|          | A10  | 5645   |       |       | 278                         |                          |                |
| U025     | B10  | 4754   | 4696  | 1.75  | 245                         | 242                      | 1.32           |
|          | B09  | 4638   |       |       | 240                         |                          |                |
| U026     | C10  | 12727  | 13566 | 8.74  | 512                         | 537                      | 6.54           |
|          | C09  | 14404  |       |       | 562                         |                          |                |
| U027     | D10  | 2778   | 2697  | 4.25  | 162                         | 159                      | 3.28           |
|          | D09  | 2616   |       |       | 155                         |                          |                |
| U028     | E10  | 13371  | 11418 | 24.2  | 531                         | 471                      | 18.2           |
|          | E09  | 9464   |       |       | 410                         |                          |                |
| U029     | F10  | 9199   | 8576  | 10.3  | 402                         | 381                      | 7.71           |
|          | F09  | 7952   |       |       | 360                         |                          |                |
| U030     | G10  | 3147   | 2808  | 17.1  | 179                         | 163                      | 13.2           |
|          | G09  | 2468   |       |       | 148                         |                          |                |
| U031     | H10  | 9743   | 9528  | 3.2   | 419                         | 412                      | 2.4            |
|          | H09  | 9312   |       |       | 405                         |                          |                |
| U032     | A11  | 3315   | 3051  | 12.3  | 186                         | 174                      | 9.43           |
|          | A12  | 2786   |       |       | 163                         |                          |                |



**Blank Data Table**

Plate: Plate\_\*25BB5AL219Y\*

Assay: Abeta 1-42

Group: Blank

| Sample * | Well | Signal | Mean | CV  |
|----------|------|--------|------|-----|
| B001     | H01  | 119    | 118  | 1.2 |
|          | H02  | 117    |      |     |

**Control Data Table**

Plate: Plate\_\*25BB5AL219Y\*

Assay: Abeta 1-42

Group: Control

| Sample * | Well | Concentration (pg/ml) | Signal | Mean | CV    | Calc. Concentration (pg/ml) | Calc. Conc. Mean (pg/ml) | % Recovery Mean | % Recovery | Calc. Conc. CV |
|----------|------|-----------------------|--------|------|-------|-----------------------------|--------------------------|-----------------|------------|----------------|
| STD 2    | C11  | 194                   | 6728   | 6307 | 9.44  | 39.7                        | 37.8                     | 19.5            | 20.5       | 7.11           |
|          | C12  |                       | 5886   |      |       | 35.9                        |                          |                 | 18.5       |                |
| STD 3    | D11  | 48.4                  | 1166   | 1123 | 5.42  | 10.2                        | 9.86                     | 20.3            | 21         | 4.51           |
|          | D12  |                       | 1080   |      |       | 9.54                        |                          |                 | 19.7       |                |
| STD 4    | E12  | 12.1                  | 332    | 350  | 7.08  | 3.03                        | 3.22                     | 26.6            | 25         | 8.44           |
|          | E11  |                       | 367    |      |       | 3.41                        |                          |                 | 28.2       |                |
| STD 5    | F11  | 3.03                  | 170    | 171  | 0.415 | 0.861                       | 0.869                    | 28.7            | 28.4       | 1.44           |
|          | F12  |                       | 171    |      |       | 0.878                       |                          |                 | 29         |                |

Plot: Standard

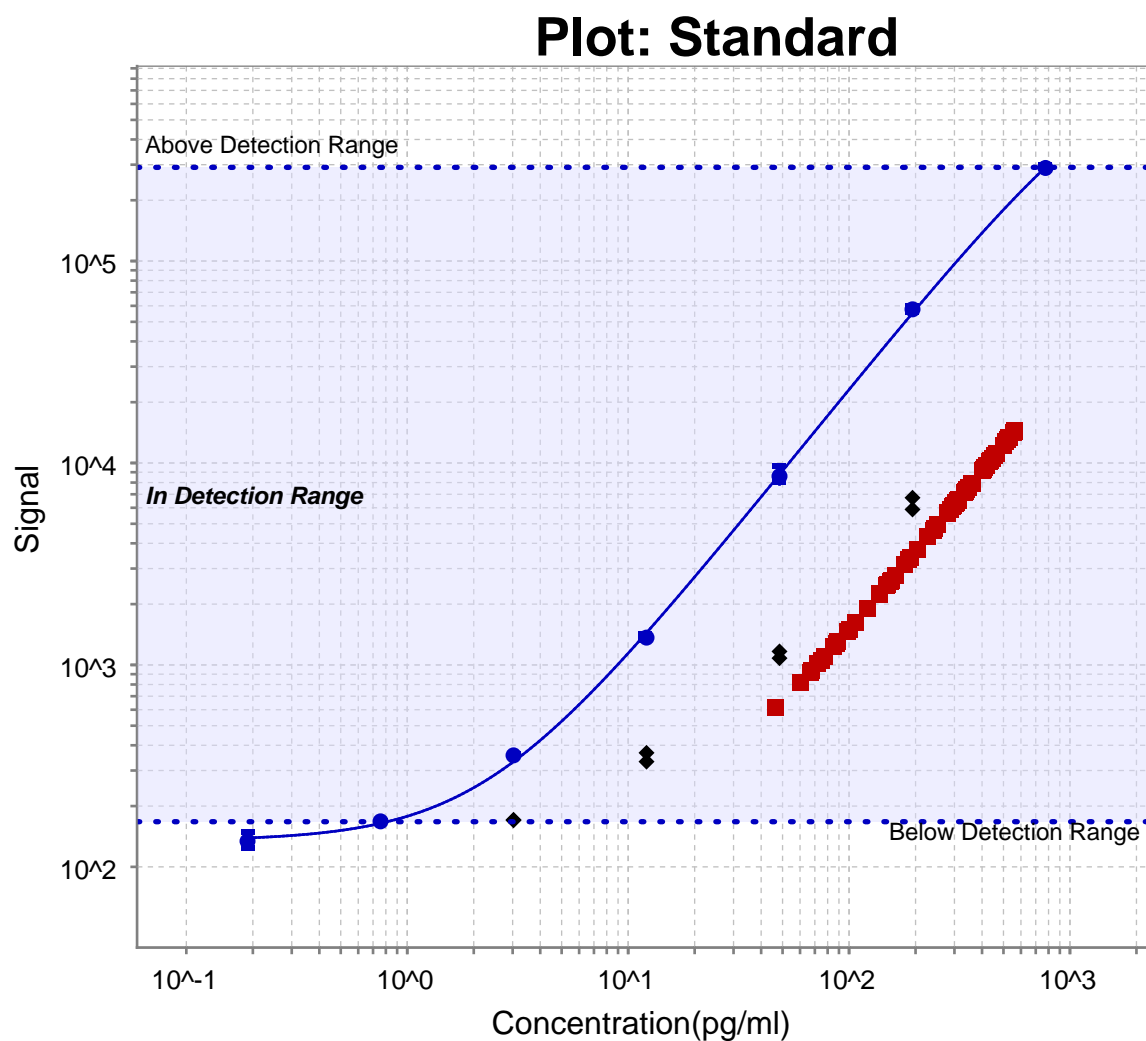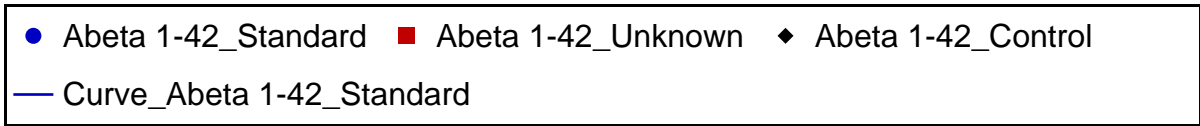

Supplement: alzrt236-S3.pdf [file alzrt236-S3.pdf]
