# Supplementary material for: Amyloid-beta 42 adsorption following serial tube transfer
Source: PubMed Central journal article supplement (PMC4059346; doi:10.1186/alzrt236), 2014-01-28

## **Report Properties**

Title: Experiment\_20131111155031

Author: Administrator

Creator: Administrator

Report Date: 11-Nov-2013

## **Notes**

**Plate Properties**

| Name           | Value                   |
|----------------|-------------------------|
| User           | Administrator           |
| Read Time      | 11/11/2013 15:47:59 GMT |
| Det Param      | Standard                |
| Type           | 96 Multi-Spot 4         |
| Wells Per Row  | 12                      |
| Wells Per Col  | 8                       |
| Spots Per Well | 4                       |
| Stack ID       | 0                       |
| Barcode1       | *25C4TAE2686*           |
| Barcode2       | N/A                     |
| Barcode3       | N/A                     |
| Plate #        | 1291                    |
| Model          | IPR                     |
| Serial #       | 1200120302692           |
| Version        | MSD_3_0_18              |
| Orient         | 0                       |
| Comments       |                         |

**20131031\_WTBioM07.2\_Ttau - Assay Assignment**

Spot : &lt;a1&gt; &lt;a2&gt;

Legend : &lt;b1&gt; &lt;b2&gt;

| Assay Assignment |            |
|------------------|------------|
| Spot ID          | Assay Name |
| 1                | Total Tau  |
| 2                |            |
| 3                |            |
| 4                |            |

**20131031\_WTBioM07.2\_Ttau - Group Association**

| Group Association |            |                |       |
|-------------------|------------|----------------|-------|
| Assay Name        | Group Name | Back Fit Curve | Blank |
| Total Tau         | Unknown    | Standard       |       |

| Group Association |            |                |       |
|-------------------|------------|----------------|-------|
| Assay Name        | Group Name | Back Fit Curve | Blank |
| Total Tau         | Standard   | -              |       |

## 20131031\_WTBioM07.2\_Ttau - Sample Definition

|          | 1                    | 2                    | 3                           | 4                           | 5                   | 6                   | 7                   | 8                   | 9                   | 10                  | 11                           | 12                           |
|----------|----------------------|----------------------|-----------------------------|-----------------------------|---------------------|---------------------|---------------------|---------------------|---------------------|---------------------|------------------------------|------------------------------|
| <b>A</b> | S001<br>Standar<br>d | S001<br>Standar<br>d | Control<br>1<br>Unkno<br>wn | Control<br>1<br>Unkno<br>wn | U008<br>Unkno<br>wn | U008<br>Unkno<br>wn | U016<br>Unkno<br>wn | U016<br>Unkno<br>wn | U024<br>Unkno<br>wn | U024<br>Unkno<br>wn | U032<br>Unkno<br>wn          | U032<br>Unkno<br>wn          |
| <b>B</b> | S002<br>Standar<br>d | S002<br>Standar<br>d | U001<br>Unkno<br>wn         | U001<br>Unkno<br>wn         | U009<br>Unkno<br>wn | U009<br>Unkno<br>wn | U017<br>Unkno<br>wn | U017<br>Unkno<br>wn | U025<br>Unkno<br>wn | U025<br>Unkno<br>wn | NCT1<br>Alpha<br>Unkno<br>wn | NCT1<br>Alpha<br>Unkno<br>wn |
| <b>C</b> | S003<br>Standar<br>d | S003<br>Standar<br>d | U002<br>Unkno<br>wn         | U002<br>Unkno<br>wn         | U010<br>Unkno<br>wn | U010<br>Unkno<br>wn | U018<br>Unkno<br>wn | U018<br>Unkno<br>wn | U026<br>Unkno<br>wn | U026<br>Unkno<br>wn | B002<br>Blank                | B002<br>Blank                |
| <b>D</b> | S004<br>Standar<br>d | S004<br>Standar<br>d | U003<br>Unkno<br>wn         | U003<br>Unkno<br>wn         | U011<br>Unkno<br>wn | U011<br>Unkno<br>wn | U019<br>Unkno<br>wn | U019<br>Unkno<br>wn | U027<br>Unkno<br>wn | U027<br>Unkno<br>wn | B002<br>Blank                | B002<br>Blank                |
| <b>E</b> | S005<br>Standar<br>d | S005<br>Standar<br>d | U004<br>Unkno<br>wn         | U004<br>Unkno<br>wn         | U012<br>Unkno<br>wn | U012<br>Unkno<br>wn | U020<br>Unkno<br>wn | U020<br>Unkno<br>wn | U028<br>Unkno<br>wn | U028<br>Unkno<br>wn | B002<br>Blank                | B002<br>Blank                |
| <b>F</b> | S006<br>Standar<br>d | S006<br>Standar<br>d | U005<br>Unkno<br>wn         | U005<br>Unkno<br>wn         | U013<br>Unkno<br>wn | U013<br>Unkno<br>wn | U021<br>Unkno<br>wn | U021<br>Unkno<br>wn | U029<br>Unkno<br>wn | U029<br>Unkno<br>wn | B002<br>Blank                | B002<br>Blank                |
| <b>G</b> | S007<br>Standar<br>d | S007<br>Standar<br>d | U006<br>Unkno<br>wn         | U006<br>Unkno<br>wn         | U014<br>Unkno<br>wn | U014<br>Unkno<br>wn | U022<br>Unkno<br>wn | U022<br>Unkno<br>wn | U030<br>Unkno<br>wn | U030<br>Unkno<br>wn | NAD1<br>Alpha<br>Unkno<br>wn | NAD1<br>Alpha<br>Unkno<br>wn |
| <b>H</b> | B001<br>Blank        | B001<br>Blank        | U007<br>Unkno<br>wn         | U007<br>Unkno<br>wn         | U015<br>Unkno<br>wn | U015<br>Unkno<br>wn | U023<br>Unkno<br>wn | U023<br>Unkno<br>wn | U031<br>Unkno<br>wn | U031<br>Unkno<br>wn | Control<br>2<br>Unkno<br>wn  | Control<br>2<br>Unkno<br>wn  |

**20131031\_WTBioM07.2\_Ttau - Total Tau's Concentration/Dilution  
Definition**

|   | 1    | 2    | 3 | 4 | 5 | 6 | 7 | 8 | 9 | 10 | 11 | 12 |
|---|------|------|---|---|---|---|---|---|---|----|----|----|
| A | 3227 | 3227 | 4 | 4 | 4 | 4 | 4 | 4 | 4 | 4  | 4  | 4  |
| B | 1076 | 1076 | 4 | 4 | 4 | 4 | 4 | 4 | 4 | 4  | 4  | 4  |
| C | 359  | 359  | 4 | 4 | 4 | 4 | 4 | 4 | 4 | 4  |    |    |
| D | 120  | 120  | 4 | 4 | 4 | 4 | 4 | 4 | 4 | 4  |    |    |
| E | 39.8 | 39.8 | 4 | 4 | 4 | 4 | 4 | 4 | 4 | 4  |    |    |
| F | 13.3 | 13.3 | 4 | 4 | 4 | 4 | 4 | 4 | 4 | 4  |    |    |
| G | 4.43 | 4.43 | 4 | 4 | 4 | 4 | 4 | 4 | 4 | 4  | 4  | 4  |
| H |      |      | 4 | 4 | 4 | 4 | 4 | 4 | 4 | 4  | 4  | 4  |

## Plate Data Table

Plate: Plate\_\*25C4TAE2686\*

| Sample *   | Assay | Well      | Dilution | Concentration (pg/ml) | Signal | Mean  | CV    | Calc. Concentration (pg/ml) | Calc. Conc. Mean (pg/ml) | Calc. Conc. CV |   |     |     |     |      |     |     |      |
|------------|-------|-----------|----------|-----------------------|--------|-------|-------|-----------------------------|--------------------------|----------------|---|-----|-----|-----|------|-----|-----|------|
| B001       |       | H01       | N/A      | N/A                   | 51     | 52    | 2.72  | N/A                         | N/A                      | N/A            |   |     |     |     |      |     |     |      |
|            |       | H02       |          |                       | 53     |       |       | N/A                         |                          |                |   |     |     |     |      |     |     |      |
| B002       |       | C11       | N/A      | N/A                   | 51     | 50    | 7.71  | N/A                         | N/A                      | N/A            |   |     |     |     |      |     |     |      |
|            |       | E12       |          |                       | 42     |       |       | N/A                         |                          |                |   |     |     |     |      |     |     |      |
|            |       | F11       |          |                       | 51     |       |       | N/A                         |                          |                |   |     |     |     |      |     |     |      |
|            |       | D11       |          |                       | 53     |       |       | N/A                         |                          |                |   |     |     |     |      |     |     |      |
|            |       | C12       |          |                       | 54     |       |       | N/A                         |                          |                |   |     |     |     |      |     |     |      |
|            |       | F12       |          |                       | 47     |       |       | N/A                         |                          |                |   |     |     |     |      |     |     |      |
|            |       | E11       |          |                       | 50     |       |       | N/A                         |                          |                |   |     |     |     |      |     |     |      |
|            |       | D12       |          |                       | 52     |       |       | N/A                         |                          |                |   |     |     |     |      |     |     |      |
|            |       | Control 1 |          |                       |        |       |       | A04                         |                          |                | 4 | N/A | 326 | 341 | 6.22 | 355 | 369 | 5.03 |
|            |       |           |          |                       |        |       |       | A03                         |                          |                |   |     | 356 |     |      | 382 |     |      |
| Control 2  |       | H11       | 4        | N/A                   | 323    | 316   | 3.13  | 353                         | 346                      | 2.57           |   |     |     |     |      |     |     |      |
|            |       | H12       |          |                       | 309    |       |       | 340                         |                          |                |   |     |     |     |      |     |     |      |
| NAD1 Alpha |       | G11       | 4        | N/A                   | 877    | 912   | 5.43  | 753                         | 774                      | 3.9            |   |     |     |     |      |     |     |      |
|            |       | G12       |          |                       | 947    |       |       | 796                         |                          |                |   |     |     |     |      |     |     |      |
| NCT1 Alpha |       | B11       | 4        | N/A                   | 249    | 238   | 6.85  | 283                         | 272                      | 6.08           |   |     |     |     |      |     |     |      |
|            |       | B12       |          |                       | 226    |       |       | 260                         |                          |                |   |     |     |     |      |     |     |      |
| S001       |       | A02       | N/A      | 3227                  | 40088  | 40833 | 2.58  | 3197                        | 3254                     | 2.47           |   |     |     |     |      |     |     |      |
|            |       | A01       |          |                       | 41577  |       |       | 3311                        |                          |                |   |     |     |     |      |     |     |      |
| S002       |       | B01       | N/A      | 1076                  | 9951   | 9956  | 0.071 | 1045                        | 1045                     | 0.052          |   |     |     |     |      |     |     |      |
|            |       | B02       |          |                       | 9961   |       |       | 1045                        |                          |                |   |     |     |     |      |     |     |      |
| S003       |       | C02       | N/A      | 359                   | 2191   | 2286  | 5.88  | 359                         | 370                      | 4.1            |   |     |     |     |      |     |     |      |
|            |       | C01       |          |                       | 2381   |       |       | 381                         |                          |                |   |     |     |     |      |     |     |      |

Plate: Plate\_\*25C4TAE2686\*

| Sample * | Assay     | Well | Dilution | Concentration (pg/ml) | Signal | Mean | CV    | Calc. Concentration (pg/ml) | Calc. Conc. Mean (pg/ml) | Calc. Conc. CV |
|----------|-----------|------|----------|-----------------------|--------|------|-------|-----------------------------|--------------------------|----------------|
| S004     |           | D02  | N/A      | 120                   | 472    | 484  | 3.51  | 119                         | 121                      | 2.68           |
|          |           | D01  |          |                       | 496    |      |       | 124                         |                          |                |
| S005     |           | E01  | N/A      | 39.8                  | 135    | 133  | 2.67  | 38.5                        | 37.6                     | 3.19           |
|          |           | E02  |          |                       | 130    |      |       | 36.8                        |                          |                |
| S006     |           | F01  | N/A      | 13.3                  | 77     | 76   | 1.86  | 15                          | 14.5                     | 5.31           |
|          |           | F02  |          |                       | 75     |      |       | 13.9                        |                          |                |
| S007     |           | G02  | N/A      | 4.43                  | 61     | 61   | 0     | 4.22                        | 4.22                     | 0              |
|          |           | G01  |          |                       | 61     |      |       | 4.22                        |                          |                |
| U001     |           | B03  | 4        | N/A                   | 1256   | 1201 | 6.54  | 973                         | 942                      | 4.64           |
|          |           | B04  |          |                       | 1145   |      |       | 911                         |                          |                |
| U002     |           | C03  | 4        | N/A                   | 1179   | 1113 | 8.39  | 930                         | 892                      | 5.97           |
|          |           | C04  |          |                       | 1047   |      |       | 855                         |                          |                |
| U003     |           | D04  | 4        | N/A                   | 1089   | 1074 | 2.04  | 879                         | 870                      | 1.46           |
|          |           | D03  |          |                       | 1058   |      |       | 861                         |                          |                |
| U004     |           | E03  | 4        | N/A                   | 1006   | 994  | 1.71  | 831                         | 824                      | 1.22           |
|          |           | E04  |          |                       | 982    |      |       | 817                         |                          |                |
| U005     |           | F03  | 4        | N/A                   | 298    | 302  | 1.64  | 330                         | 333                      | 1.36           |
|          |           | F04  |          |                       | 305    |      |       | 336                         |                          |                |
| U006     |           | G03  | 4        | N/A                   | 823    | 828  | 0.854 | 719                         | 722                      | 0.618          |
|          |           | G04  |          |                       | 833    |      |       | 725                         |                          |                |
| U007     |           | H03  | 4        | N/A                   | 280    | 268  | 6.61  | 313                         | 301                      | 5.66           |
|          |           | H04  |          |                       | 255    |      |       | 289                         |                          |                |
| U008     | Total Tau | A06  | 4        | N/A                   | 306    | 302  | 2.11  | 337                         | 333                      | 1.75           |
|          |           | A05  |          |                       | 297    |      |       | 329                         |                          |                |
| U009     |           | B06  | 4        | N/A                   | 251    | 270  | 9.95  | 285                         | 303                      | 8.51           |
|          |           | B05  |          |                       | 289    |      |       | 322                         |                          |                |
| U010     |           | C05  | 4        | N/A                   | 288    | 307  | 8.75  | 321                         | 338                      | 7.25           |

Plate: Plate\_\*25C4TAE2686\*

| Sample * | Assay | Well | Dilution | Concentration (pg/ml) | Signal | Mean | CV    | Calc. Concentration (pg/ml) | Calc. Conc. Mean (pg/ml) | Calc. Conc. CV |
|----------|-------|------|----------|-----------------------|--------|------|-------|-----------------------------|--------------------------|----------------|
|          |       | C06  |          |                       | 326    |      |       | 355                         |                          |                |
| U011     |       | D05  | 4        | N/A                   | 723    | 716  | 1.38  | 654                         | 650                      | 1.01           |
|          |       | D06  |          |                       | 709    |      |       | 645                         |                          |                |
| U012     |       | E06  | 4        | N/A                   | 184    | 186  | 1.14  | 214                         | 216                      | 1.12           |
|          |       | E05  |          |                       | 187    |      |       | 218                         |                          |                |
| U013     |       | F06  | 4        | N/A                   | 169    | 169  | 0     | 197                         | 197                      | 0              |
|          |       | F05  |          |                       | 169    |      |       | 197                         |                          |                |
| U014     |       | G06  | 4        | N/A                   | 181    | 174  | 5.69  | 211                         | 203                      | 5.73           |
|          |       | G05  |          |                       | 167    |      |       | 194                         |                          |                |
| U015     |       | H06  | 4        | N/A                   | 1027   | 1041 | 1.9   | 843                         | 851                      | 1.36           |
|          |       | H05  |          |                       | 1055   |      |       | 859                         |                          |                |
| U016     |       | A08  | 4        | N/A                   | 235    | 235  | 0     | 269                         | 269                      | 0              |
|          |       | A07  |          |                       | 235    |      |       | 269                         |                          |                |
| U017     |       | B07  | 4        | N/A                   | 966    | 909  | 8.95  | 807                         | 772                      | 6.44           |
|          |       | B08  |          |                       | 851    |      |       | 737                         |                          |                |
| U018     |       | C07  | 4        | N/A                   | 1162   | 1170 | 0.907 | 921                         | 925                      | 0.644          |
|          |       | C08  |          |                       | 1177   |      |       | 929                         |                          |                |
| U019     |       | D07  | 4        | N/A                   | 1187   | 1184 | 0.418 | 935                         | 933                      | 0.297          |
|          |       | D08  |          |                       | 1180   |      |       | 931                         |                          |                |
| U020     |       | E07  | 4        | N/A                   | 1051   | 1122 | 8.95  | 857                         | 898                      | 6.37           |
|          |       | E08  |          |                       | 1193   |      |       | 938                         |                          |                |
| U021     |       | F08  | 4        | N/A                   | 292    | 300  | 3.77  | 325                         | 332                      | 3.14           |
|          |       | F07  |          |                       | 308    |      |       | 339                         |                          |                |
| U022     |       | G07  | 4        | N/A                   | 1123   | 1118 | 0.632 | 899                         | 896                      | 0.45           |
|          |       | G08  |          |                       | 1113   |      |       | 893                         |                          |                |
| U023     |       | H07  | 4        | N/A                   | 296    | 310  | 6.17  | 328                         | 340                      | 5.09           |
|          |       | H08  |          |                       | 323    |      |       | 353                         |                          |                |



Plate: Plate\_\*25C4TAE2686\*

| Sample * | Assay | Well | Dilution | Concentration (pg/ml) | Signal | Mean | CV    | Calc. Concentration (pg/ml) | Calc. Conc. Mean (pg/ml) | Calc. Conc. CV |
|----------|-------|------|----------|-----------------------|--------|------|-------|-----------------------------|--------------------------|----------------|
| U024     |       | A09  | 4        | N/A                   | 261    | 270  | 4.71  | 295                         | 304                      | 4.03           |
|          |       | A10  |          |                       | 279    |      |       | 312                         |                          |                |
| U025     |       | B10  | 4        | N/A                   | 222    | 229  | 4.32  | 256                         | 263                      | 3.88           |
|          |       | B09  |          |                       | 236    |      |       | 270                         |                          |                |
| U026     |       | C10  | 4        | N/A                   | 1052   | 1056 | 0.536 | 858                         | 860                      | 0.382          |
|          |       | C09  |          |                       | 1060   |      |       | 862                         |                          |                |
| U027     |       | D10  | 4        | N/A                   | 687    | 685  | 0.413 | 630                         | 629                      | 0.303          |
|          |       | D09  |          |                       | 683    |      |       | 628                         |                          |                |
| U028     |       | E10  | 4        | N/A                   | 238    | 240  | 0.886 | 272                         | 274                      | 0.784          |
|          |       | E09  |          |                       | 241    |      |       | 275                         |                          |                |
| U029     |       | F10  | 4        | N/A                   | 905    | 924  | 2.83  | 770                         | 781                      | 2.04           |
|          |       | F09  |          |                       | 942    |      |       | 793                         |                          |                |
| U030     |       | G10  | 4        | N/A                   | 285    | 269  | 8.41  | 318                         | 303                      | 7.2            |
|          |       | G09  |          |                       | 253    |      |       | 287                         |                          |                |
| U031     |       | H10  | 4        | N/A                   | 777    | 831  | 9.19  | 690                         | 724                      | 6.66           |
|          |       | H09  |          |                       | 885    |      |       | 758                         |                          |                |
| U032     |       | A11  | 4        | N/A                   | 233    | 231  | 1.22  | 267                         | 265                      | 1.1            |
|          |       | A12  |          |                       | 229    |      |       | 263                         |                          |                |

**Data Grid Legend**

| Name                          | Abbreviation |
|-------------------------------|--------------|
| Assay                         | A:           |
| Assay Results                 | AR:          |
| Calculated Concentration      | CC:          |
| Calculated Concentration C.V. | CCCV:        |
| Calculated Concentration Mean | CCM:         |
| Calculated Concentration S.D. | CCSD:        |
| Concentrations                | C:           |
| Detection Range               | DR:          |
| Dilutions                     | D:           |
| % Recovery                    | %R:          |
| % Recovery Mean               | %RM:         |
| Sample                        | S:           |
| Sample Group                  | SG:          |
| Signal C.V.                   | CV:          |
| Signal Mean                   | M:           |
| Signal                        | R:           |
| Signal S.D.                   | SD:          |

## Data Grid - Total Tau

|          | 1                               | 2                               | 3                  | 4                  | 5                  | 6                  | 7                  | 8                  | 9                  | 10                 | 11                | 12                |
|----------|---------------------------------|---------------------------------|--------------------|--------------------|--------------------|--------------------|--------------------|--------------------|--------------------|--------------------|-------------------|-------------------|
| <b>A</b> | R: 41577<br>C: 3227<br>CC: 3311 | R: 40088<br>C: 3227<br>CC: 3197 | R: 356<br>CC: 382  | R: 326<br>CC: 355  | R: 297<br>CC: 329  | R: 306<br>CC: 337  | R: 235<br>CC: 269  | R: 235<br>CC: 269  | R: 261<br>CC: 295  | R: 279<br>CC: 312  | R: 233<br>CC: 267 | R: 229<br>CC: 263 |
| <b>B</b> | R: 9951<br>C: 1076<br>CC: 1045  | R: 9961<br>C: 1076<br>CC: 1045  | R: 1256<br>CC: 973 | R: 1145<br>CC: 911 | R: 289<br>CC: 322  | R: 251<br>CC: 285  | R: 966<br>CC: 807  | R: 851<br>CC: 737  | R: 236<br>CC: 270  | R: 222<br>CC: 256  | R: 249<br>CC: 283 | R: 226<br>CC: 260 |
| <b>C</b> | R: 2381<br>C: 359<br>CC: 381    | R: 2191<br>C: 359<br>CC: 359    | R: 1179<br>CC: 930 | R: 1047<br>CC: 855 | R: 288<br>CC: 321  | R: 326<br>CC: 355  | R: 1162<br>CC: 921 | R: 1177<br>CC: 929 | R: 1060<br>CC: 862 | R: 1052<br>CC: 858 | R: 51             | R: 54             |
| <b>D</b> | R: 496<br>C: 120<br>CC: 124     | R: 472<br>C: 120<br>CC: 119     | R: 1058<br>CC: 861 | R: 1089<br>CC: 879 | R: 723<br>CC: 654  | R: 709<br>CC: 645  | R: 1187<br>CC: 935 | R: 1180<br>CC: 931 | R: 683<br>CC: 628  | R: 687<br>CC: 630  | R: 53             | R: 52             |
| <b>E</b> | R: 135<br>C: 39.8<br>CC: 38.5   | R: 130<br>C: 39.8<br>CC: 36.8   | R: 1006<br>CC: 831 | R: 982<br>CC: 817  | R: 187<br>CC: 218  | R: 184<br>CC: 214  | R: 1051<br>CC: 857 | R: 1193<br>CC: 938 | R: 241<br>CC: 275  | R: 238<br>CC: 272  | R: 50             | R: 42             |
| <b>F</b> | R: 77<br>C: 13.3<br>CC: 15      | R: 75<br>C: 13.3<br>CC: 13.9    | R: 298<br>CC: 330  | R: 305<br>CC: 336  | R: 169<br>CC: 197  | R: 169<br>CC: 197  | R: 308<br>CC: 339  | R: 292<br>CC: 325  | R: 942<br>CC: 793  | R: 905<br>CC: 770  | R: 51             | R: 47             |
| <b>G</b> | R: 61<br>C: 4.43<br>CC: 4.22    | R: 61<br>C: 4.43<br>CC: 4.22    | R: 823<br>CC: 719  | R: 833<br>CC: 725  | R: 167<br>CC: 194  | R: 181<br>CC: 211  | R: 1123<br>CC: 899 | R: 1113<br>CC: 893 | R: 253<br>CC: 287  | R: 285<br>CC: 318  | R: 877<br>CC: 753 | R: 947<br>CC: 796 |
| <b>H</b> | R: 51                           | R: 53                           | R: 280<br>CC: 313  | R: 255<br>CC: 289  | R: 1055<br>CC: 859 | R: 1027<br>CC: 843 | R: 296<br>CC: 328  | R: 323<br>CC: 353  | R: 885<br>CC: 758  | R: 777<br>CC: 690  | R: 323<br>CC: 353 | R: 309<br>CC: 340 |

**Standard Data Table**

Plate: Plate\_\*25C4TAE2686\*

Assay: Total Tau

Group: Standard

| Sample * | Well | Concentration (pg/ml) | Signal | Mean  | CV    | Calc. Concentration (pg/ml) | Calc. Conc. Mean (pg/ml) | Calc. Conc. CV |
|----------|------|-----------------------|--------|-------|-------|-----------------------------|--------------------------|----------------|
| S001     | A02  | 3227                  | 40088  | 40833 | 2.58  | 3197                        | 3254                     | 2.47           |
|          | A01  |                       | 41577  |       |       | 3311                        |                          |                |
| S002     | B01  | 1076                  | 9951   | 9956  | 0.071 | 1045                        | 1045                     | 0.052          |
|          | B02  |                       | 9961   |       |       | 1045                        |                          |                |
| S003     | C02  | 359                   | 2191   | 2286  | 5.88  | 359                         | 370                      | 4.1            |
|          | C01  |                       | 2381   |       |       | 381                         |                          |                |
| S004     | D02  | 120                   | 472    | 484   | 3.51  | 119                         | 121                      | 2.68           |
|          | D01  |                       | 496    |       |       | 124                         |                          |                |
| S005     | E01  | 39.8                  | 135    | 133   | 2.67  | 38.5                        | 37.6                     | 3.19           |
|          | E02  |                       | 130    |       |       | 36.8                        |                          |                |
| S006     | F01  | 13.3                  | 77     | 76    | 1.86  | 15                          | 14.5                     | 5.31           |
|          | F02  |                       | 75     |       |       | 13.9                        |                          |                |
| S007     | G02  | 4.43                  | 61     | 61    | 0     | 4.22                        | 4.22                     | 0              |
|          | G01  |                       | 61     |       |       | 4.22                        |                          |                |

## Standard Analysis Properties

| Name                       | Value                                             |
|----------------------------|---------------------------------------------------|
| Algorithm Parameters       |                                                   |
| Initial Top                | 41241                                             |
| Initial Bottom             | 54.9                                              |
| Initial MidPoint           | 1807                                              |
| Initial HillSlope          | 1                                                 |
| Weighting                  | 1/y^2                                             |
| Max Iteration              | 500                                               |
| Fit Statistics             |                                                   |
| RSquared                   | 1                                                 |
| Calculated Parameters      |                                                   |
| Top                        | 135696                                            |
| Bottom                     | 58.2                                              |
| MidPoint                   | 5724                                              |
| HillSlope                  | 1.49                                              |
| Detection Range Parameters |                                                   |
| Low                        | 19.6                                              |
| High                       | 3227                                              |
| Equation                   |                                                   |
| FourPL                     | $y = b_2 + \frac{b_1 - b_2}{1 + (x / b_3)^{b_4}}$ |

## Unknown Data Table

Plate: Plate\_\*25C4TAE2686\*

Assay: Total Tau

Group: Unknown

| Sample *   | Well | Signal | Mean | CV    | Calc. Concentration (pg/ml) | Calc. Conc. Mean (pg/ml) | Calc. Conc. CV |
|------------|------|--------|------|-------|-----------------------------|--------------------------|----------------|
| Control 1  | A04  | 326    | 341  | 6.22  | 355                         | 369                      | 5.03           |
|            | A03  | 356    |      |       | 382                         |                          |                |
| Control 2  | H11  | 323    | 316  | 3.13  | 353                         | 346                      | 2.57           |
|            | H12  | 309    |      |       | 340                         |                          |                |
| NAD1 Alpha | G11  | 877    | 912  | 5.43  | 753                         | 774                      | 3.9            |
|            | G12  | 947    |      |       | 796                         |                          |                |
| NCT1 Alpha | B11  | 249    | 238  | 6.85  | 283                         | 272                      | 6.08           |
|            | B12  | 226    |      |       | 260                         |                          |                |
| U001       | B03  | 1256   | 1201 | 6.54  | 973                         | 942                      | 4.64           |
|            | B04  | 1145   |      |       | 911                         |                          |                |
| U002       | C03  | 1179   | 1113 | 8.39  | 930                         | 892                      | 5.97           |
|            | C04  | 1047   |      |       | 855                         |                          |                |
| U003       | D04  | 1089   | 1074 | 2.04  | 879                         | 870                      | 1.46           |
|            | D03  | 1058   |      |       | 861                         |                          |                |
| U004       | E03  | 1006   | 994  | 1.71  | 831                         | 824                      | 1.22           |
|            | E04  | 982    |      |       | 817                         |                          |                |
| U005       | F03  | 298    | 302  | 1.64  | 330                         | 333                      | 1.36           |
|            | F04  | 305    |      |       | 336                         |                          |                |
| U006       | G03  | 823    | 828  | 0.854 | 719                         | 722                      | 0.618          |
|            | G04  | 833    |      |       | 725                         |                          |                |
| U007       | H03  | 280    | 268  | 6.61  | 313                         | 301                      | 5.66           |
|            | H04  | 255    |      |       | 289                         |                          |                |
| U008       | A06  | 306    | 302  | 2.11  | 337                         | 333                      | 1.75           |
|            | A05  | 297    |      |       | 329                         |                          |                |
| U009       | B06  | 251    | 270  | 9.95  | 285                         | 303                      | 8.51           |

Plate: Plate\_\*25C4TAE2686\*

Assay: Total Tau

Group: Unknown

| Sample # | Well | Signal | Mean | CV    | Calc. Concentration (pg/ml) | Calc. Conc. Mean (pg/ml) | Calc. Conc. CV |
|----------|------|--------|------|-------|-----------------------------|--------------------------|----------------|
|          | B05  | 289    |      |       | 322                         |                          |                |
| U010     | C05  | 288    | 307  | 8.75  | 321                         | 338                      | 7.25           |
|          | C06  | 326    |      |       | 355                         |                          |                |
| U011     | D05  | 723    | 716  | 1.38  | 654                         | 650                      | 1.01           |
|          | D06  | 709    |      |       | 645                         |                          |                |
| U012     | E06  | 184    | 186  | 1.14  | 214                         | 216                      | 1.12           |
|          | E05  | 187    |      |       | 218                         |                          |                |
| U013     | F06  | 169    | 169  | 0     | 197                         | 197                      | 0              |
|          | F05  | 169    |      |       | 197                         |                          |                |
| U014     | G06  | 181    | 174  | 5.69  | 211                         | 203                      | 5.73           |
|          | G05  | 167    |      |       | 194                         |                          |                |
| U015     | H06  | 1027   | 1041 | 1.9   | 843                         | 851                      | 1.36           |
|          | H05  | 1055   |      |       | 859                         |                          |                |
| U016     | A08  | 235    | 235  | 0     | 269                         | 269                      | 0              |
|          | A07  | 235    |      |       | 269                         |                          |                |
| U017     | B07  | 966    | 909  | 8.95  | 807                         | 772                      | 6.44           |
|          | B08  | 851    |      |       | 737                         |                          |                |
| U018     | C07  | 1162   | 1170 | 0.907 | 921                         | 925                      | 0.644          |
|          | C08  | 1177   |      |       | 929                         |                          |                |
| U019     | D07  | 1187   | 1184 | 0.418 | 935                         | 933                      | 0.297          |
|          | D08  | 1180   |      |       | 931                         |                          |                |
| U020     | E07  | 1051   | 1122 | 8.95  | 857                         | 898                      | 6.37           |
|          | E08  | 1193   |      |       | 938                         |                          |                |
| U021     | F08  | 292    | 300  | 3.77  | 325                         | 332                      | 3.14           |
|          | F07  | 308    |      |       | 339                         |                          |                |
| U022     | G07  | 1123   | 1118 | 0.632 | 899                         | 896                      | 0.45           |
|          | G08  | 1113   |      |       | 893                         |                          |                |

Plate: Plate\_\*25C4TAE2686\*

Assay: Total Tau

Group: Unknown

| Sample * | Well | Signal | Mean | CV    | Calc. Concentration (pg/ml) | Calc. Conc. Mean (pg/ml) | Calc. Conc. CV |
|----------|------|--------|------|-------|-----------------------------|--------------------------|----------------|
| U023     | H07  | 296    | 310  | 6.17  | 328                         | 340                      | 5.09           |
|          | H08  | 323    |      |       | 353                         |                          |                |
| U024     | A09  | 261    | 270  | 4.71  | 295                         | 304                      | 4.03           |
|          | A10  | 279    |      |       | 312                         |                          |                |
| U025     | B10  | 222    | 229  | 4.32  | 256                         | 263                      | 3.88           |
|          | B09  | 236    |      |       | 270                         |                          |                |
| U026     | C10  | 1052   | 1056 | 0.536 | 858                         | 860                      | 0.382          |
|          | C09  | 1060   |      |       | 862                         |                          |                |
| U027     | D10  | 687    | 685  | 0.413 | 630                         | 629                      | 0.303          |
|          | D09  | 683    |      |       | 628                         |                          |                |
| U028     | E10  | 238    | 240  | 0.886 | 272                         | 274                      | 0.784          |
|          | E09  | 241    |      |       | 275                         |                          |                |
| U029     | F10  | 905    | 924  | 2.83  | 770                         | 781                      | 2.04           |
|          | F09  | 942    |      |       | 793                         |                          |                |
| U030     | G10  | 285    | 269  | 8.41  | 318                         | 303                      | 7.2            |
|          | G09  | 253    |      |       | 287                         |                          |                |
| U031     | H10  | 777    | 831  | 9.19  | 690                         | 724                      | 6.66           |
|          | H09  | 885    |      |       | 758                         |                          |                |
| U032     | A11  | 233    | 231  | 1.22  | 267                         | 265                      | 1.1            |
|          | A12  | 229    |      |       | 263                         |                          |                |



**Blank Data Table**

Plate: Plate\_\*25C4TAE2686\*

Assay: Total Tau

Group: Blank

| Sample * | Well | Signal | Mean | CV   |
|----------|------|--------|------|------|
| B001     | H01  | 51     | 52   | 2.72 |
|          | H02  | 53     |      |      |
| B002     | C11  | 51     | 50   | 7.71 |
|          | E12  | 42     |      |      |
|          | F11  | 51     |      |      |
|          | D11  | 53     |      |      |
|          | C12  | 54     |      |      |
|          | F12  | 47     |      |      |
|          | E11  | 50     |      |      |
|          | D12  | 52     |      |      |

Plot: Standard

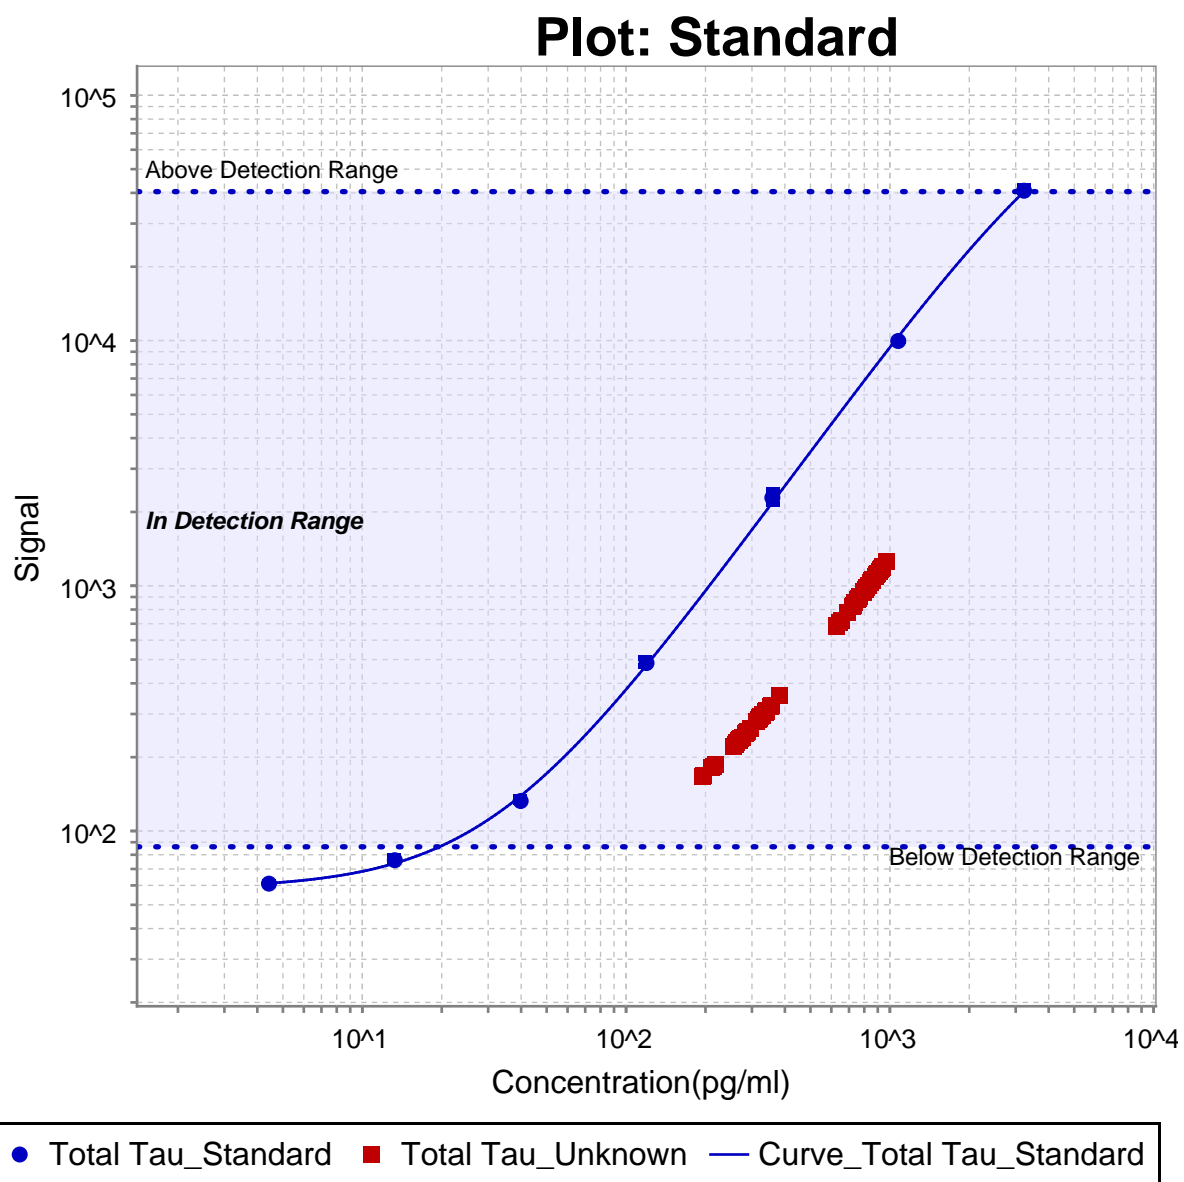

Supplement: alzrt236-S4.pdf [file alzrt236-S4.pdf]
