# Supplementary material for: Amyloid-beta 42 adsorption following serial tube transfer
Source: PubMed Central journal article supplement (PMC4059346; doi:10.1186/alzrt236), 2014-01-28

## Report Properties

Title: Experiment\_20131031152056

Author: Administrator

Creator: Administrator

Report Date: 31-Oct-2013

## Notes

**Plate Properties**

| Name           | Value                   |
|----------------|-------------------------|
| User           | Administrator           |
| Read Time      | 10/31/2013 14:58:23 GMT |
| Det Param      | Standard                |
| Type           | 96 Multi-Spot 4         |
| Wells Per Row  | 12                      |
| Wells Per Col  | 8                       |
| Spots Per Well | 4                       |
| Stack ID       | 0                       |
| Barcode1       | *25BB5AY6121*           |
| Barcode2       | N/A                     |
| Barcode3       | N/A                     |
| Plate #        | 1279                    |
| Model          | IPR                     |
| Serial #       | 1200120302692           |
| Version        | MSD_3_0_18              |
| Orient         | 0                       |
| Comments       |                         |

**20131030\_WTBioM07.2\_Ab - Assay Assignment**

Spot : &lt;a1&gt; &lt;a2&gt;

Legend : &lt;b1&gt; &lt;b2&gt;

| Assay Assignment |            |
|------------------|------------|
| Spot ID          | Assay Name |
| 1                | Abeta 1-42 |
| 2                |            |
| 3                |            |
| 4                |            |

**20131030\_WTBioM07.2\_Ab - Group Association**

| Group Association |            |                |       |
|-------------------|------------|----------------|-------|
| Assay Name        | Group Name | Back Fit Curve | Blank |
| Abeta 1-42        | Unknown    | Standard       |       |

| Group Association |            |                |       |
|-------------------|------------|----------------|-------|
| Assay Name        | Group Name | Back Fit Curve | Blank |
| Abeta 1-42        | Standard   | -              |       |
| Abeta 1-42        | Control    | Standard       |       |

## 20131030\_WTBioM07.2\_Ab - Sample Definition

|          | 1             | 2             | 3                  | 4                  | 5             | 6             | 7             | 8             | 9             | 10            | 11                  | 12                  |
|----------|---------------|---------------|--------------------|--------------------|---------------|---------------|---------------|---------------|---------------|---------------|---------------------|---------------------|
| <b>A</b> | S001 Standard | S001 Standard | Control 1 Unkno wn | Control 1 Unkno wn | U008 Unkno wn | U008 Unkno wn | U016 Unkno wn | U016 Unkno wn | U024 Unkno wn | U024 Unkno wn | U032 Unkno wn       | U032 Unkno wn       |
| <b>B</b> | S002 Standard | S002 Standard | U001 Unkno wn      | U001 Unkno wn      | U009 Unkno wn | U009 Unkno wn | U017 Unkno wn | U017 Unkno wn | U025 Unkno wn | U025 Unkno wn | NCT1 Alpha Unkno wn | NCT1 Alpha Unkno wn |
| <b>C</b> | S003 Standard | S003 Standard | U002 Unkno wn      | U002 Unkno wn      | U010 Unkno wn | U010 Unkno wn | U018 Unkno wn | U018 Unkno wn | U026 Unkno wn | U026 Unkno wn | STD 2 Control       | STD 2 Control       |
| <b>D</b> | S004 Standard | S004 Standard | U003 Unkno wn      | U003 Unkno wn      | U011 Unkno wn | U011 Unkno wn | U019 Unkno wn | U019 Unkno wn | U027 Unkno wn | U027 Unkno wn | STD 3 Control       | STD 3 Control       |
| <b>E</b> | S005 Standard | S005 Standard | U004 Unkno wn      | U004 Unkno wn      | U012 Unkno wn | U012 Unkno wn | U020 Unkno wn | U020 Unkno wn | U028 Unkno wn | U028 Unkno wn | STD 4 Control       | STD 4 Control       |
| <b>F</b> | S006 Standard | S006 Standard | U005 Unkno wn      | U005 Unkno wn      | U013 Unkno wn | U013 Unkno wn | U021 Unkno wn | U021 Unkno wn | U029 Unkno wn | U029 Unkno wn | STD 5 Control       | STD 5 Control       |
| <b>G</b> | S007 Standard | S007 Standard | U006 Unkno wn      | U006 Unkno wn      | U014 Unkno wn | U014 Unkno wn | U022 Unkno wn | U022 Unkno wn | U030 Unkno wn | U030 Unkno wn | NAD1 Alpha Unkno wn | NAD1 Alpha Unkno wn |
| <b>H</b> | B001 Blank    | B001 Blank    | U007 Unkno wn      | U007 Unkno wn      | U015 Unkno wn | U015 Unkno wn | U023 Unkno wn | U023 Unkno wn | U031 Unkno wn | U031 Unkno wn | Control 2 Unkno wn  | Control 2 Unkno wn  |

**20131030\_WTBioM07.2\_Ab - Abeta 1-42's Concentration/Dilution  
Definition**

|   | 1     | 2     | 3 | 4 | 5 | 6 | 7 | 8 | 9 | 10 | 11   | 12   |
|---|-------|-------|---|---|---|---|---|---|---|----|------|------|
| A | 775   | 775   | 8 | 8 | 8 | 8 | 8 | 8 | 8 | 8  | 8    | 8    |
| B | 194   | 194   | 8 | 8 | 8 | 8 | 8 | 8 | 8 | 8  | 8    | 8    |
| C | 48.4  | 48.4  | 8 | 8 | 8 | 8 | 8 | 8 | 8 | 8  | 194  | 194  |
| D | 12.1  | 12.1  | 8 | 8 | 8 | 8 | 8 | 8 | 8 | 8  | 48.4 | 48.4 |
| E | 3.03  | 3.03  | 8 | 8 | 8 | 8 | 8 | 8 | 8 | 8  | 12.1 | 12.1 |
| F | 0.757 | 0.757 | 8 | 8 | 8 | 8 | 8 | 8 | 8 | 8  | 3.03 | 3.03 |
| G | 0.189 | 0.189 | 8 | 8 | 8 | 8 | 8 | 8 | 8 | 8  | 8    | 8    |
| H |       |       | 8 | 8 | 8 | 8 | 8 | 8 | 8 | 8  | 8    | 8    |

## Plate Data Table

Plate: Plate\_\*25BB5AY6121\*

| Sample *   | Assay | Well | Dilution | Concentration (pg/ml) | Signal     | Mean       | CV    | Calc. Concentration (pg/ml) | Calc. Conc. Mean (pg/ml) | Calc. Conc. CV |
|------------|-------|------|----------|-----------------------|------------|------------|-------|-----------------------------|--------------------------|----------------|
| B001       |       | H01  | N/A      | N/A                   | 121        | 130        | 9.28  | N/A                         | N/A                      | N/A            |
|            |       | H01  |          |                       | 121        |            |       | N/A                         |                          |                |
|            |       | H02  |          |                       | 138        |            |       | N/A                         |                          |                |
|            |       | H02  |          |                       | 138        |            |       | N/A                         |                          |                |
| Control 1  |       | A04  | 8        | N/A                   | 6841       | 7066       | 4.5   | 343                         | 351                      | 3.33           |
|            |       | A03  |          |                       | 7291       |            |       | 359                         |                          |                |
| Control 2  |       | H11  | 8        | N/A                   | 6299       | 6421       | 2.68  | 322                         | 327                      | 1.98           |
|            |       | H12  |          |                       | 6542       |            |       | 331                         |                          |                |
| NAD1 Alpha |       | G11  | 8        | N/A                   | 7071       | 7004       | 1.35  | 351                         | 349                      | 1              |
|            |       | G12  |          |                       | 6937       |            |       | 346                         |                          |                |
| NCT1 Alpha |       | B11  | 8        | N/A                   | 10169      | 8984       | 18.7  | 459                         | 418                      | 13.8           |
|            |       | B12  |          |                       | 7798       |            |       | 377                         |                          |                |
| S001       |       | A02  | N/A      | 775                   | 30021<br>6 | 29859<br>7 | 0.767 | 771                         | 767                      | 0.679          |
|            |       | A01  |          |                       | 29697<br>7 |            |       | 763                         |                          |                |
| S002       |       | B01  | N/A      | 194                   | 53298      | 58173      | 11.9  | 195                         | 208                      | 8.91           |
|            |       | B02  |          |                       | 63047      |            |       | 221                         |                          |                |
| S003       |       | C02  | N/A      | 48.4                  | 8064       | 7432       | 12    | 48.4                        | 45.5                     | 8.9            |
|            |       | C01  |          |                       | 6799       |            |       | 42.6                        |                          |                |
| S004       |       | D02  | N/A      | 12.1                  | 1285       | 1287       | 0.22  | 12                          | 12                       | 0.177          |
|            |       | D01  |          |                       | 1289       |            |       | 12                          |                          |                |
| S005       |       | E01  | N/A      | 3.03                  | 326        | 322        | 1.98  | 3.29                        | 3.24                     | 2.44           |
|            |       | E02  |          |                       | 317        |            |       | 3.18                        |                          |                |
| S006       |       | F01  | N/A      | 0.757                 | 167        | 168        | 0.422 | 0.938                       | 0.948                    | 1.48           |

Plate: Plate\_\*25BB5AY6121\*

| Sample * | Assay      | Well | Dilution | Concentration (pg/ml) | Signal | Mean  | CV    | Calc. Concentration (pg/ml) | Calc. Conc. Mean (pg/ml) | Calc. Conc. CV |
|----------|------------|------|----------|-----------------------|--------|-------|-------|-----------------------------|--------------------------|----------------|
|          |            | F02  |          |                       | 168    |       |       | 0.957                       |                          |                |
| S007     |            | G02  | N/A      | 0.189                 | 128    | 129   | 1.1   | 0                           | 0                        | N/A            |
|          |            | G01  |          |                       | 130    |       |       | 0                           |                          |                |
| STD 2    |            | C11  | N/A      | 194                   | 51013  | 50518 | 1.39  | 189                         | 187                      | 1.04           |
|          |            | C12  |          |                       | 50022  |       |       | 186                         |                          |                |
| STD 3    |            | D11  | N/A      | 48.4                  | 7499   | 7479  | 0.388 | 45.8                        | 45.7                     | 0.286          |
|          |            | D12  |          |                       | 7458   |       |       | 45.7                        |                          |                |
| STD 4    |            | E12  | N/A      | 12.1                  | 1185   | 1261  | 8.47  | 11.2                        | 11.8                     | 6.85           |
|          |            | E11  |          |                       | 1336   |       |       | 12.3                        |                          |                |
| STD 5    |            | F11  | N/A      | 3.03                  | 347    | 341   | 2.7   | 3.55                        | 3.47                     | 3.2            |
|          |            | F12  |          |                       | 334    |       |       | 3.39                        |                          |                |
| U001     |            | B03  | 8        | N/A                   | 967    | 960   | 1.11  | 75.8                        | 75.3                     | 0.927          |
|          |            | B04  |          |                       | 952    |       |       | 74.8                        |                          |                |
| U002     |            | C03  | 8        | N/A                   | 3391   | 3462  | 2.9   | 203                         | 206                      | 2.18           |
|          |            | C04  |          |                       | 3533   |       |       | 209                         |                          |                |
| U003     |            | D04  | 8        | N/A                   | 12689  | 13354 | 7.04  | 540                         | 561                      | 5.18           |
|          |            | D03  |          |                       | 14019  |       |       | 581                         |                          |                |
| U004     |            | E03  | 8        | N/A                   | 12615  | 12443 | 1.95  | 538                         | 533                      | 1.44           |
|          |            | E04  |          |                       | 12271  |       |       | 527                         |                          |                |
| U005     |            | F03  | 8        | N/A                   | 1777   | 1781  | 0.278 | 124                         | 124                      | 0.217          |
|          |            | F04  |          |                       | 1784   |       |       | 124                         |                          |                |
| U006     |            | G03  | 8        | N/A                   | 14067  | 13520 | 5.73  | 583                         | 566                      | 4.21           |
|          |            | G04  |          |                       | 12972  |       |       | 549                         |                          |                |
| U007     |            | H03  | 8        | N/A                   | 779    | 910   | 20.3  | 63                          | 71.8                     | 17.3           |
|          |            | H04  |          |                       | 1040   |       |       | 80.5                        |                          |                |
| U008     | Abeta 1-42 | A06  | 8        | N/A                   | 11511  | 12558 | 11.8  | 503                         | 536                      | 8.68           |
|          |            | A05  |          |                       | 13605  |       |       | 569                         |                          |                |

Plate: Plate\_\*25BB5AY6121\*

| Sample * | Assay | Well | Dilution | Concentration (pg/ml) | Signal | Mean  | CV   | Calc. Concentration (pg/ml) | Calc. Conc. Mean (pg/ml) | Calc. Conc. CV |
|----------|-------|------|----------|-----------------------|--------|-------|------|-----------------------------|--------------------------|----------------|
| U009     |       | B06  | 8        | N/A                   | 1519   | 1381  | 14.2 | 109                         | 101                      | 11.4           |
|          |       | B05  |          |                       | 1242   |       |      | 93.1                        |                          |                |
| U010     |       | C05  | 8        | N/A                   | 6683   | 6591  | 1.97 | 337                         | 333                      | 1.46           |
|          |       | C06  |          |                       | 6499   |       |      | 330                         |                          |                |
| U011     |       | D05  | 8        | N/A                   | 14073  | 14986 | 8.61 | 583                         | 610                      | 6.34           |
|          |       | D06  |          |                       | 15898  |       |      | 638                         |                          |                |
| U012     |       | E06  | 8        | N/A                   | 8549   | 8231  | 5.46 | 404                         | 393                      | 4.03           |
|          |       | E05  |          |                       | 7913   |       |      | 382                         |                          |                |
| U013     |       | F06  | 8        | N/A                   | 2555   | 2432  | 7.15 | 164                         | 158                      | 5.48           |
|          |       | F05  |          |                       | 2309   |       |      | 152                         |                          |                |
| U014     |       | G06  | 8        | N/A                   | 12630  | 13409 | 8.21 | 538                         | 562                      | 6.04           |
|          |       | G05  |          |                       | 14187  |       |      | 586                         |                          |                |
| U015     |       | H06  | 8        | N/A                   | 1156   | 1178  | 2.64 | 87.9                        | 89.2                     | 2.15           |
|          |       | H05  |          |                       | 1200   |       |      | 90.6                        |                          |                |
| U016     |       | A08  | 8        | N/A                   | 7973   | 7552  | 7.89 | 384                         | 368                      | 5.83           |
|          |       | A07  |          |                       | 7130   |       |      | 353                         |                          |                |
| U017     |       | B07  | 8        | N/A                   | 2586   | 2638  | 2.79 | 165                         | 168                      | 2.12           |
|          |       | B08  |          |                       | 2690   |       |      | 170                         |                          |                |
| U018     |       | C07  | 8        | N/A                   | 8688   | 7842  | 15.3 | 409                         | 379                      | 11.3           |
|          |       | C08  |          |                       | 6995   |       |      | 348                         |                          |                |
| U019     |       | D07  | 8        | N/A                   | 8797   | 9016  | 3.44 | 413                         | 420                      | 2.53           |
|          |       | D08  |          |                       | 9235   |       |      | 428                         |                          |                |
| U020     |       | E07  | 8        | N/A                   | 6890   | 6414  | 10.5 | 344                         | 326                      | 7.79           |
|          |       | E08  |          |                       | 5937   |       |      | 308                         |                          |                |
| U021     |       | F08  | 8        | N/A                   | 5664   | 6076  | 9.58 | 298                         | 314                      | 7.1            |
|          |       | F07  |          |                       | 6487   |       |      | 329                         |                          |                |
| U022     |       | G07  | 8        | N/A                   | 5899   | 6039  | 3.28 | 307                         | 312                      | 2.43           |



Plate: Plate\_\*25BB5AY6121\*

| Sample * | Assay | Well | Dilution | Concentration (pg/ml) | Signal | Mean  | CV    | Calc. Concentration (pg/ml) | Calc. Conc. Mean (pg/ml) | Calc. Conc. CV |
|----------|-------|------|----------|-----------------------|--------|-------|-------|-----------------------------|--------------------------|----------------|
|          |       | G08  |          |                       | 6179   |       |       | 318                         |                          |                |
| U023     |       | H07  | 8        | N/A                   | 4893   | 5088  | 5.41  | 267                         | 275                      | 4.02           |
|          |       | H08  |          |                       | 5282   |       |       | 283                         |                          |                |
| U024     |       | A09  | 8        | N/A                   | 4055   | 4068  | 0.435 | 232                         | 233                      | 0.325          |
|          |       | A10  |          |                       | 4080   |       |       | 233                         |                          |                |
| U025     |       | B10  | 8        | N/A                   | 904    | 845   | 9.87  | 71.6                        | 67.6                     | 8.48           |
|          |       | B09  |          |                       | 786    |       |       | 63.5                        |                          |                |
| U026     |       | C10  | 8        | N/A                   | 1995   | 2102  | 7.17  | 135                         | 141                      | 5.54           |
|          |       | C09  |          |                       | 2208   |       |       | 147                         |                          |                |
| U027     |       | D10  | 8        | N/A                   | 3840   | 3849  | 0.312 | 223                         | 223                      | 0.234          |
|          |       | D09  |          |                       | 3857   |       |       | 224                         |                          |                |
| U028     |       | E10  | 8        | N/A                   | 13516  | 13814 | 3.05  | 566                         | 575                      | 2.24           |
|          |       | E09  |          |                       | 14112  |       |       | 584                         |                          |                |
| U029     |       | F10  | 8        | N/A                   | 10205  | 9437  | 11.5  | 460                         | 434                      | 8.49           |
|          |       | F09  |          |                       | 8669   |       |       | 408                         |                          |                |
| U030     |       | G10  | 8        | N/A                   | 2340   | 2163  | 11.6  | 153                         | 144                      | 8.96           |
|          |       | G09  |          |                       | 1985   |       |       | 135                         |                          |                |
| U031     |       | H10  | 8        | N/A                   | 2999   | 3074  | 3.45  | 185                         | 189                      | 2.61           |
|          |       | H09  |          |                       | 3149   |       |       | 192                         |                          |                |
| U032     |       | A11  | 8        | N/A                   | 4737   | 4062  | 23.5  | 261                         | 232                      | 17.7           |
|          |       | A12  |          |                       | 3386   |       |       | 203                         |                          |                |

**Data Grid Legend**

| Name                          | Abbreviation |
|-------------------------------|--------------|
| Assay                         | A:           |
| Assay Results                 | AR:          |
| Calculated Concentration      | CC:          |
| Calculated Concentration C.V. | CCCV:        |
| Calculated Concentration Mean | CCM:         |
| Calculated Concentration S.D. | CCSD:        |
| Concentrations                | C:           |
| Detection Range               | DR:          |
| Dilutions                     | D:           |
| % Recovery                    | %R:          |
| % Recovery Mean               | %RM:         |
| Sample                        | S:           |
| Sample Group                  | SG:          |
| Signal C.V.                   | CV:          |
| Signal Mean                   | M:           |
| Signal                        | R:           |
| Signal S.D.                   | SD:          |

## Data Grid - Abeta 1-42

|          | 1                               | 2                               | 3                   | 4                   | 5                   | 6                   | 7                  | 8                  | 9                   | 10                  | 11                             | 12                             |
|----------|---------------------------------|---------------------------------|---------------------|---------------------|---------------------|---------------------|--------------------|--------------------|---------------------|---------------------|--------------------------------|--------------------------------|
| <b>A</b> | R: 296977<br>C: 775<br>CC: 763  | R: 300216<br>C: 775<br>CC: 771  | R: 7291<br>CC: 359  | R: 6841<br>CC: 343  | R: 13605<br>CC: 569 | R: 11511<br>CC: 503 | R: 7130<br>CC: 353 | R: 7973<br>CC: 384 | R: 4055<br>CC: 232  | R: 4080<br>CC: 233  | R: 4737<br>CC: 261             | R: 3386<br>CC: 203             |
| <b>B</b> | R: 53298<br>C: 194<br>CC: 195   | R: 63047<br>C: 194<br>CC: 221   | R: 967<br>CC: 75.8  | R: 952<br>CC: 74.8  | R: 1242<br>CC: 93.1 | R: 1519<br>CC: 109  | R: 2586<br>CC: 165 | R: 2690<br>CC: 170 | R: 786<br>CC: 63.5  | R: 904<br>CC: 71.6  | R: 10169<br>CC: 459            | R: 7798<br>CC: 377             |
| <b>C</b> | R: 6799<br>C: 48.4<br>CC: 42.6  | R: 8064<br>C: 48.4<br>CC: 48.4  | R: 3391<br>CC: 203  | R: 3533<br>CC: 209  | R: 6683<br>CC: 337  | R: 6499<br>CC: 330  | R: 8688<br>CC: 409 | R: 6995<br>CC: 348 | R: 2208<br>CC: 147  | R: 1995<br>CC: 135  | R: 51013<br>C: 194<br>CC: 189  | R: 50022<br>C: 194<br>CC: 186  |
| <b>D</b> | R: 1289<br>C: 12.1<br>CC: 12    | R: 1285<br>C: 12.1<br>CC: 12    | R: 14019<br>CC: 581 | R: 12689<br>CC: 540 | R: 14073<br>CC: 583 | R: 15898<br>CC: 638 | R: 8797<br>CC: 413 | R: 9235<br>CC: 428 | R: 3857<br>CC: 224  | R: 3840<br>CC: 223  | R: 7499<br>C: 48.4<br>CC: 45.8 | R: 7458<br>C: 48.4<br>CC: 45.7 |
| <b>E</b> | R: 326<br>C: 3.03<br>CC: 3.29   | R: 317<br>C: 3.03<br>CC: 3.18   | R: 12615<br>CC: 538 | R: 12271<br>CC: 527 | R: 7913<br>CC: 382  | R: 8549<br>CC: 404  | R: 6890<br>CC: 344 | R: 5937<br>CC: 308 | R: 14112<br>CC: 584 | R: 13516<br>CC: 566 | R: 1336<br>C: 12.1<br>CC: 12.3 | R: 1185<br>C: 12.1<br>CC: 11.2 |
| <b>F</b> | R: 167<br>C: 0.757<br>CC: 0.938 | R: 168<br>C: 0.757<br>CC: 0.957 | R: 1777<br>CC: 124  | R: 1784<br>CC: 124  | R: 2309<br>CC: 152  | R: 2555<br>CC: 164  | R: 6487<br>CC: 329 | R: 5664<br>CC: 298 | R: 8669<br>CC: 408  | R: 10205<br>CC: 460 | R: 347<br>C: 3.03<br>CC: 3.55  | R: 334<br>C: 3.03<br>CC: 3.39  |
| <b>G</b> | R: 130<br>C: 0.189<br>CC: 0     | R: 128<br>C: 0.189<br>CC: 0     | R: 14067<br>CC: 583 | R: 12972<br>CC: 549 | R: 14187<br>CC: 586 | R: 12630<br>CC: 538 | R: 5899<br>CC: 307 | R: 6179<br>CC: 318 | R: 1985<br>CC: 135  | R: 2340<br>CC: 153  | R: 7071<br>CC: 351             | R: 6937<br>CC: 346             |
| <b>H</b> | R: 121                          | R: 138                          | R: 779<br>CC: 63    | R: 1040<br>CC: 80.5 | R: 1200<br>CC: 90.6 | R: 1156<br>CC: 87.9 | R: 4893<br>CC: 267 | R: 5282<br>CC: 283 | R: 3149<br>CC: 192  | R: 2999<br>CC: 185  | R: 6299<br>CC: 322             | R: 6542<br>CC: 331             |

## Standard Data Table

Plate: Plate\_\*25BB5AY6121\*

Assay: Abeta 1-42

Group: Standard

| Sample # | Well | Concentration (pg/ml) | Signal | Mean   | CV    | Calc. Concentration (pg/ml) | Calc. Conc. Mean (pg/ml) | Calc. Conc. CV |
|----------|------|-----------------------|--------|--------|-------|-----------------------------|--------------------------|----------------|
| S001     | A02  | 775                   | 300216 | 298597 | 0.767 | 771                         | 767                      | 0.679          |
|          | A01  |                       | 296977 |        |       | 763                         |                          |                |
| S002     | B01  | 194                   | 53298  | 58173  | 11.9  | 195                         | 208                      | 8.91           |
|          | B02  |                       | 63047  |        |       | 221                         |                          |                |
| S003     | C02  | 48.4                  | 8064   | 7432   | 12    | 48.4                        | 45.5                     | 8.9            |
|          | C01  |                       | 6799   |        |       | 42.6                        |                          |                |
| S004     | D02  | 12.1                  | 1285   | 1287   | 0.22  | 12                          | 12                       | 0.177          |
|          | D01  |                       | 1289   |        |       | 12                          |                          |                |
| S005     | E01  | 3.03                  | 326    | 322    | 1.98  | 3.29                        | 3.24                     | 2.44           |
|          | E02  |                       | 317    |        |       | 3.18                        |                          |                |
| S006     | F01  | 0.757                 | 167    | 168    | 0.422 | 0.938                       | 0.948                    | 1.48           |
|          | F02  |                       | 168    |        |       | 0.957                       |                          |                |
| S007     | G02  | 0.189                 | 128    | 129    | 1.1   | 0                           | 0                        | N/A            |
|          | G01  |                       | 130    |        |       | 0                           |                          |                |

## Standard Analysis Properties

| Name                       | Value                                             |
|----------------------------|---------------------------------------------------|
| Algorithm Parameters       |                                                   |
| Initial Top                | 301582                                            |
| Initial Bottom             | 116                                               |
| Initial MidPoint           | 414                                               |
| Initial HillSlope          | 1                                                 |
| Weighting                  | 1/y^2                                             |
| Max Iteration              | 500                                               |
| Fit Statistics             |                                                   |
| RSquared                   | 1                                                 |
| Calculated Parameters      |                                                   |
| Top                        | 1620278                                           |
| Bottom                     | 133                                               |
| MidPoint                   | 2246                                              |
| HillSlope                  | 1.38                                              |
| Detection Range Parameters |                                                   |
| Low                        | 0.831                                             |
| High                       | 775                                               |
| Equation                   |                                                   |
| FourPL                     | $y = b_2 + \frac{b_1 - b_2}{1 + (x / b_3)^{b_4}}$ |

## Unknown Data Table

Plate: Plate\_\*25BB5AY6121\*

Assay: Abeta 1-42

Group: Unknown

| Sample #   | Well | Signal | Mean  | CV    | Calc. Concentration (pg/ml) | Calc. Conc. Mean (pg/ml) | Calc. Conc. CV |
|------------|------|--------|-------|-------|-----------------------------|--------------------------|----------------|
| Control 1  | A04  | 6841   | 7066  | 4.5   | 343                         | 351                      | 3.33           |
|            | A03  | 7291   |       |       | 359                         |                          |                |
| Control 2  | H11  | 6299   | 6421  | 2.68  | 322                         | 327                      | 1.98           |
|            | H12  | 6542   |       |       | 331                         |                          |                |
| NAD1 Alpha | G11  | 7071   | 7004  | 1.35  | 351                         | 349                      | 1              |
|            | G12  | 6937   |       |       | 346                         |                          |                |
| NCT1 Alpha | B11  | 10169  | 8984  | 18.7  | 459                         | 418                      | 13.8           |
|            | B12  | 7798   |       |       | 377                         |                          |                |
| U001       | B03  | 967    | 960   | 1.11  | 75.8                        | 75.3                     | 0.927          |
|            | B04  | 952    |       |       | 74.8                        |                          |                |
| U002       | C03  | 3391   | 3462  | 2.9   | 203                         | 206                      | 2.18           |
|            | C04  | 3533   |       |       | 209                         |                          |                |
| U003       | D04  | 12689  | 13354 | 7.04  | 540                         | 561                      | 5.18           |
|            | D03  | 14019  |       |       | 581                         |                          |                |
| U004       | E03  | 12615  | 12443 | 1.95  | 538                         | 533                      | 1.44           |
|            | E04  | 12271  |       |       | 527                         |                          |                |
| U005       | F03  | 1777   | 1781  | 0.278 | 124                         | 124                      | 0.217          |
|            | F04  | 1784   |       |       | 124                         |                          |                |
| U006       | G03  | 14067  | 13520 | 5.73  | 583                         | 566                      | 4.21           |
|            | G04  | 12972  |       |       | 549                         |                          |                |
| U007       | H03  | 779    | 910   | 20.3  | 63                          | 71.8                     | 17.3           |
|            | H04  | 1040   |       |       | 80.5                        |                          |                |
| U008       | A06  | 11511  | 12558 | 11.8  | 503                         | 536                      | 8.68           |
|            | A05  | 13605  |       |       | 569                         |                          |                |
| U009       | B06  | 1519   | 1381  | 14.2  | 109                         | 101                      | 11.4           |

Plate: Plate\_\*25BB5AY6121\*

Assay: Abeta 1-42

Group: Unknown

| Sample # | Well | Signal | Mean  | CV   | Calc. Concentration (pg/ml) | Calc. Conc. Mean (pg/ml) | Calc. Conc. CV |
|----------|------|--------|-------|------|-----------------------------|--------------------------|----------------|
|          | B05  | 1242   |       |      | 93.1                        |                          |                |
| U010     | C05  | 6683   | 6591  | 1.97 | 337                         | 333                      | 1.46           |
|          | C06  | 6499   |       |      | 330                         |                          |                |
| U011     | D05  | 14073  | 14986 | 8.61 | 583                         | 610                      | 6.34           |
|          | D06  | 15898  |       |      | 638                         |                          |                |
| U012     | E06  | 8549   | 8231  | 5.46 | 404                         | 393                      | 4.03           |
|          | E05  | 7913   |       |      | 382                         |                          |                |
| U013     | F06  | 2555   | 2432  | 7.15 | 164                         | 158                      | 5.48           |
|          | F05  | 2309   |       |      | 152                         |                          |                |
| U014     | G06  | 12630  | 13409 | 8.21 | 538                         | 562                      | 6.04           |
|          | G05  | 14187  |       |      | 586                         |                          |                |
| U015     | H06  | 1156   | 1178  | 2.64 | 87.9                        | 89.2                     | 2.15           |
|          | H05  | 1200   |       |      | 90.6                        |                          |                |
| U016     | A08  | 7973   | 7552  | 7.89 | 384                         | 368                      | 5.83           |
|          | A07  | 7130   |       |      | 353                         |                          |                |
| U017     | B07  | 2586   | 2638  | 2.79 | 165                         | 168                      | 2.12           |
|          | B08  | 2690   |       |      | 170                         |                          |                |
| U018     | C07  | 8688   | 7842  | 15.3 | 409                         | 379                      | 11.3           |
|          | C08  | 6995   |       |      | 348                         |                          |                |
| U019     | D07  | 8797   | 9016  | 3.44 | 413                         | 420                      | 2.53           |
|          | D08  | 9235   |       |      | 428                         |                          |                |
| U020     | E07  | 6890   | 6414  | 10.5 | 344                         | 326                      | 7.79           |
|          | E08  | 5937   |       |      | 308                         |                          |                |
| U021     | F08  | 5664   | 6076  | 9.58 | 298                         | 314                      | 7.1            |
|          | F07  | 6487   |       |      | 329                         |                          |                |
| U022     | G07  | 5899   | 6039  | 3.28 | 307                         | 312                      | 2.43           |
|          | G08  | 6179   |       |      | 318                         |                          |                |

Plate: Plate\_\*25BB5AY6121\*

Assay: Abeta 1-42

Group: Unknown

| Sample # | Well | Signal | Mean  | CV    | Calc. Concentration (pg/ml) | Calc. Conc. Mean (pg/ml) | Calc. Conc. CV |
|----------|------|--------|-------|-------|-----------------------------|--------------------------|----------------|
| U023     | H07  | 4893   | 5088  | 5.41  | 267                         | 275                      | 4.02           |
|          | H08  | 5282   |       |       | 283                         |                          |                |
| U024     | A09  | 4055   | 4068  | 0.435 | 232                         | 233                      | 0.325          |
|          | A10  | 4080   |       |       | 233                         |                          |                |
| U025     | B10  | 904    | 845   | 9.87  | 71.6                        | 67.6                     | 8.48           |
|          | B09  | 786    |       |       | 63.5                        |                          |                |
| U026     | C10  | 1995   | 2102  | 7.17  | 135                         | 141                      | 5.54           |
|          | C09  | 2208   |       |       | 147                         |                          |                |
| U027     | D10  | 3840   | 3849  | 0.312 | 223                         | 223                      | 0.234          |
|          | D09  | 3857   |       |       | 224                         |                          |                |
| U028     | E10  | 13516  | 13814 | 3.05  | 566                         | 575                      | 2.24           |
|          | E09  | 14112  |       |       | 584                         |                          |                |
| U029     | F10  | 10205  | 9437  | 11.5  | 460                         | 434                      | 8.49           |
|          | F09  | 8669   |       |       | 408                         |                          |                |
| U030     | G10  | 2340   | 2163  | 11.6  | 153                         | 144                      | 8.96           |
|          | G09  | 1985   |       |       | 135                         |                          |                |
| U031     | H10  | 2999   | 3074  | 3.45  | 185                         | 189                      | 2.61           |
|          | H09  | 3149   |       |       | 192                         |                          |                |
| U032     | A11  | 4737   | 4062  | 23.5  | 261                         | 232                      | 17.7           |
|          | A12  | 3386   |       |       | 203                         |                          |                |



**Blank Data Table**

Plate: Plate\_\*25BB5AY6121\*

Assay: Abeta 1-42

Group: Blank

| Sample * | Well | Signal | Mean | CV   |
|----------|------|--------|------|------|
| B001     | H01  | 121    | 130  | 9.28 |
|          | H02  | 138    |      |      |

**Control Data Table**

Plate: Plate\_\*25BB5AY6121\*

Assay: Abeta 1-42

Group: Control

| Sample # | Well | Concentration (pg/ml) | Signal | Mean  | CV    | Calc. Concentration (pg/ml) | % Recovery Mean | % Recovery | Calc. Conc. Mean (pg/ml) | Calc. Conc. CV |
|----------|------|-----------------------|--------|-------|-------|-----------------------------|-----------------|------------|--------------------------|----------------|
| STD 2    | C11  | 194                   | 51013  | 50518 | 1.39  | 189                         | 96.7            | 97.4       | 187                      | 1.04           |
|          | C12  |                       | 50022  |       |       | 186                         |                 | 96         |                          |                |
| STD 3    | D11  | 48.4                  | 7499   | 7479  | 0.388 | 45.8                        | 94.4            | 94.6       | 45.7                     | 0.286          |
|          | D12  |                       | 7458   |       |       | 45.7                        |                 | 94.2       |                          |                |
| STD 4    | E12  | 12.1                  | 1185   | 1261  | 8.47  | 11.2                        | 97.3            | 92.6       | 11.8                     | 6.85           |
|          | E11  |                       | 1336   |       |       | 12.3                        |                 | 102        |                          |                |
| STD 5    | F11  | 3.03                  | 347    | 341   | 2.7   | 3.55                        | 115             | 117        | 3.47                     | 3.2            |
|          | F12  |                       | 334    |       |       | 3.39                        |                 | 112        |                          |                |

Plot: Standard

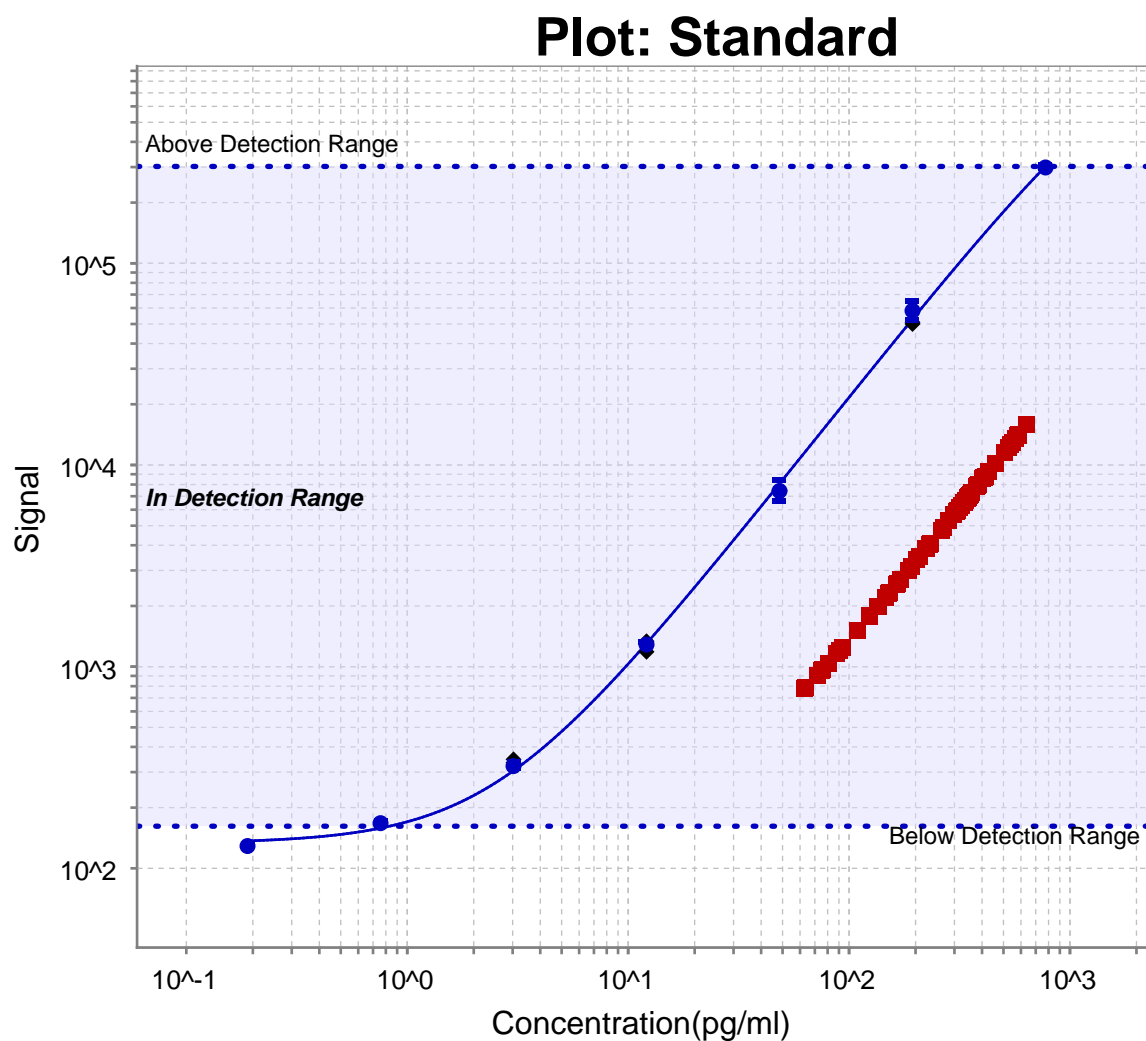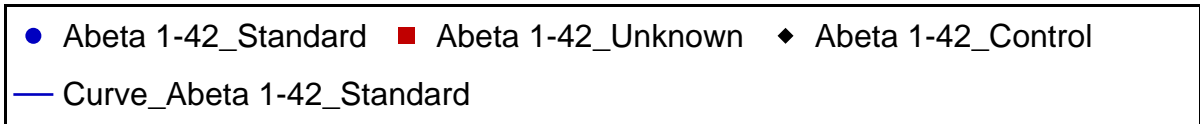

Supplement: alzrt236-S5.pdf [file alzrt236-S5.pdf]
