# Supplementary material for: Amyloid-beta 42 adsorption following serial tube transfer
Source: PubMed Central journal article supplement (PMC4059346; doi:10.1186/alzrt236), 2014-01-28

## Report Properties

Title: Experiment\_20131031152310

Author: Administrator

Creator: Administrator

Report Date: 31-Oct-2013

## Notes

**Plate Properties**

| Name           | Value                   |
|----------------|-------------------------|
| User           | Administrator           |
| Read Time      | 10/31/2013 15:18:10 GMT |
| Det Param      | Standard                |
| Type           | 96 Multi-Spot 4         |
| Wells Per Row  | 12                      |
| Wells Per Col  | 8                       |
| Spots Per Well | 4                       |
| Stack ID       | 0                       |
| Barcode1       | *25C4TAL4719*           |
| Barcode2       | N/A                     |
| Barcode3       | N/A                     |
| Plate #        | 1280                    |
| Model          | IPR                     |
| Serial #       | 1200120302692           |
| Version        | MSD_3_0_18              |
| Orient         | 0                       |
| Comments       |                         |

**20131031\_WTBioM07.2\_Ttau - Assay Assignment**

Spot : &lt;a1&gt; &lt;a2&gt;

Legend : &lt;b1&gt; &lt;b2&gt;

| Assay Assignment |            |
|------------------|------------|
| Spot ID          | Assay Name |
| 1                | Total Tau  |
| 2                |            |
| 3                |            |
| 4                |            |

**20131031\_WTBioM07.2\_Ttau - Group Association**

| Group Association |            |                |       |
|-------------------|------------|----------------|-------|
| Assay Name        | Group Name | Back Fit Curve | Blank |
| Total Tau         | Unknown    | Standard       |       |

| Group Association |            |                |       |
|-------------------|------------|----------------|-------|
| Assay Name        | Group Name | Back Fit Curve | Blank |
| Total Tau         | Standard   | -              |       |

## 20131031\_WTBioM07.2\_Ttau - Sample Definition

|          | 1                    | 2                    | 3                           | 4                           | 5                   | 6                   | 7                   | 8                   | 9                   | 10                  | 11                           | 12                           |
|----------|----------------------|----------------------|-----------------------------|-----------------------------|---------------------|---------------------|---------------------|---------------------|---------------------|---------------------|------------------------------|------------------------------|
| <b>A</b> | S001<br>Standar<br>d | S001<br>Standar<br>d | Control<br>1<br>Unkno<br>wn | Control<br>1<br>Unkno<br>wn | U008<br>Unkno<br>wn | U008<br>Unkno<br>wn | U016<br>Unkno<br>wn | U016<br>Unkno<br>wn | U024<br>Unkno<br>wn | U024<br>Unkno<br>wn | U032<br>Unkno<br>wn          | U032<br>Unkno<br>wn          |
| <b>B</b> | S002<br>Standar<br>d | S002<br>Standar<br>d | U001<br>Unkno<br>wn         | U001<br>Unkno<br>wn         | U009<br>Unkno<br>wn | U009<br>Unkno<br>wn | U017<br>Unkno<br>wn | U017<br>Unkno<br>wn | U025<br>Unkno<br>wn | U025<br>Unkno<br>wn | NCT1<br>Alpha<br>Unkno<br>wn | NCT1<br>Alpha<br>Unkno<br>wn |
| <b>C</b> | S003<br>Standar<br>d | S003<br>Standar<br>d | U002<br>Unkno<br>wn         | U002<br>Unkno<br>wn         | U010<br>Unkno<br>wn | U010<br>Unkno<br>wn | U018<br>Unkno<br>wn | U018<br>Unkno<br>wn | U026<br>Unkno<br>wn | U026<br>Unkno<br>wn | B002<br>Blank                | B002<br>Blank                |
| <b>D</b> | S004<br>Standar<br>d | S004<br>Standar<br>d | U003<br>Unkno<br>wn         | U003<br>Unkno<br>wn         | U011<br>Unkno<br>wn | U011<br>Unkno<br>wn | U019<br>Unkno<br>wn | U019<br>Unkno<br>wn | U027<br>Unkno<br>wn | U027<br>Unkno<br>wn | B002<br>Blank                | B002<br>Blank                |
| <b>E</b> | S005<br>Standar<br>d | S005<br>Standar<br>d | U004<br>Unkno<br>wn         | U004<br>Unkno<br>wn         | U012<br>Unkno<br>wn | U012<br>Unkno<br>wn | U020<br>Unkno<br>wn | U020<br>Unkno<br>wn | U028<br>Unkno<br>wn | U028<br>Unkno<br>wn | B002<br>Blank                | B002<br>Blank                |
| <b>F</b> | S006<br>Standar<br>d | S006<br>Standar<br>d | U005<br>Unkno<br>wn         | U005<br>Unkno<br>wn         | U013<br>Unkno<br>wn | U013<br>Unkno<br>wn | U021<br>Unkno<br>wn | U021<br>Unkno<br>wn | U029<br>Unkno<br>wn | U029<br>Unkno<br>wn | B002<br>Blank                | B002<br>Blank                |
| <b>G</b> | S007<br>Standar<br>d | S007<br>Standar<br>d | U006<br>Unkno<br>wn         | U006<br>Unkno<br>wn         | U014<br>Unkno<br>wn | U014<br>Unkno<br>wn | U022<br>Unkno<br>wn | U022<br>Unkno<br>wn | U030<br>Unkno<br>wn | U030<br>Unkno<br>wn | NAD1<br>Alpha<br>Unkno<br>wn | NAD1<br>Alpha<br>Unkno<br>wn |
| <b>H</b> | B001<br>Blank        | B001<br>Blank        | U007<br>Unkno<br>wn         | U007<br>Unkno<br>wn         | U015<br>Unkno<br>wn | U015<br>Unkno<br>wn | U023<br>Unkno<br>wn | U023<br>Unkno<br>wn | U031<br>Unkno<br>wn | U031<br>Unkno<br>wn | Control<br>2<br>Unkno<br>wn  | Control<br>2<br>Unkno<br>wn  |

**20131031\_WTBioM07.2\_Ttau - Total Tau's Concentration/Dilution  
Definition**

|   | 1    | 2    | 3 | 4 | 5 | 6 | 7 | 8 | 9 | 10 | 11 | 12 |
|---|------|------|---|---|---|---|---|---|---|----|----|----|
| A | 3227 | 3227 | 4 | 4 | 4 | 4 | 4 | 4 | 4 | 4  | 4  | 4  |
| B | 1076 | 1076 | 4 | 4 | 4 | 4 | 4 | 4 | 4 | 4  | 4  | 4  |
| C | 359  | 359  | 4 | 4 | 4 | 4 | 4 | 4 | 4 | 4  |    |    |
| D | 120  | 120  | 4 | 4 | 4 | 4 | 4 | 4 | 4 | 4  |    |    |
| E | 39.8 | 39.8 | 4 | 4 | 4 | 4 | 4 | 4 | 4 | 4  |    |    |
| F | 13.3 | 13.3 | 4 | 4 | 4 | 4 | 4 | 4 | 4 | 4  |    |    |
| G | 4.43 | 4.43 | 4 | 4 | 4 | 4 | 4 | 4 | 4 | 4  | 4  | 4  |
| H |      |      | 4 | 4 | 4 | 4 | 4 | 4 | 4 | 4  | 4  | 4  |

## Plate Data Table

Plate: Plate\_\*25C4TAL4719\*

| Sample *   | Assay | Well      | Dilution | Concentration (pg/ml) | Signal | Mean  | CV    | Calc. Concentration (pg/ml) | Calc. Conc. Mean (pg/ml) | Calc. Conc. CV |
|------------|-------|-----------|----------|-----------------------|--------|-------|-------|-----------------------------|--------------------------|----------------|
| B001       |       | H01       | N/A      | N/A                   | 55     | 62    | 16    | N/A                         | N/A                      | N/A            |
|            |       | H02       |          |                       | 69     |       |       | N/A                         |                          |                |
| B002       |       | C11       | N/A      | N/A                   | 68     | 61    | 5.9   | N/A                         | N/A                      | N/A            |
|            |       | E12       |          |                       | 64     |       |       | N/A                         |                          |                |
|            |       | F11       |          |                       | 63     |       |       | N/A                         |                          |                |
|            |       | D11       |          |                       | 56     |       |       | N/A                         |                          |                |
|            |       | C12       |          |                       | 60     |       |       | N/A                         |                          |                |
|            |       | F12       |          |                       | 61     |       |       | N/A                         |                          |                |
|            |       | E11       |          |                       | 60     |       |       | N/A                         |                          |                |
|            |       | D12       |          |                       | 59     |       |       | N/A                         |                          |                |
|            |       | C11       |          |                       | 68     |       |       | N/A                         |                          |                |
|            |       | Control 1 |          |                       |        |       |       | A04                         |                          |                |
| A03        | 324   |           | 340      |                       |        |       |       |                             |                          |                |
| Control 2  |       | H11       | 4        | N/A                   | 308    | 307   | 0.461 | 326                         | 325                      | 0.388          |
|            |       | H12       |          |                       | 306    |       |       | 324                         |                          |                |
| NAD1 Alpha |       | G11       | 4        | N/A                   | 880    | 852   | 4.73  | 730                         | 713                      | 3.43           |
|            |       | G12       |          |                       | 823    |       |       | 695                         |                          |                |
| NCT1 Alpha |       | B11       | 4        | N/A                   | 255    | 249   | 3.7   | 277                         | 270                      | 3.32           |
|            |       | B12       |          |                       | 242    |       |       | 264                         |                          |                |
| S001       |       | A02       | N/A      | 3227                  | 42790  | 41253 | 5.27  | 3358                        | 3238                     | 5.25           |
|            |       | A01       |          |                       | 39715  |       |       | 3118                        |                          |                |
| S002       |       | B01       | N/A      | 1076                  | 10053  | 10633 | 7.71  | 1019                        | 1062                     | 5.65           |
|            |       | B02       |          |                       | 11213  |       |       | 1104                        |                          |                |
| S003       |       | C02       | N/A      | 359                   | 2507   | 2388  | 7.08  | 382                         | 369                      | 4.94           |

Plate: Plate\_\*25C4TAL4719\*

| Sample * | Assay     | Well | Dilution | Concentration (pg/ml) | Signal | Mean | CV    | Calc. Concentration (pg/ml) | Calc. Conc. Mean (pg/ml) | Calc. Conc. CV |
|----------|-----------|------|----------|-----------------------|--------|------|-------|-----------------------------|--------------------------|----------------|
|          |           | C01  |          |                       | 2268   |      |       | 356                         |                          |                |
| S004     |           | D02  | N/A      | 120                   | 507    | 474  | 10    | 121                         | 115                      | 7.74           |
|          |           | D01  |          |                       | 440    |      |       | 109                         |                          |                |
| S005     |           | E01  | N/A      | 39.8                  | 154    | 158  | 3.58  | 41.9                        | 43.2                     | 4              |
|          |           | E02  |          |                       | 162    |      |       | 44.4                        |                          |                |
| S006     |           | F01  | N/A      | 13.3                  | 67     | 75   | 14.2  | 4.76                        | 9.65                     | 71.6           |
|          |           | F02  |          |                       | 82     |      |       | 14.5                        |                          |                |
| S007     |           | G02  | N/A      | 4.43                  | 65     | 70   | 9.16  | 2.68                        | 6.32                     | 81.4           |
|          |           | G01  |          |                       | 74     |      |       | 9.95                        |                          |                |
| U001     |           | B03  | 4        | N/A                   | 195    | 195  | 0     | 215                         | 215                      | 0              |
|          |           | B04  |          |                       | 195    |      |       | 215                         |                          |                |
| U002     |           | C03  | 4        | N/A                   | 896    | 926  | 4.58  | 739                         | 757                      | 3.3            |
|          |           | C04  |          |                       | 956    |      |       | 775                         |                          |                |
| U003     |           | D04  | 4        | N/A                   | 305    | 286  | 9.66  | 323                         | 305                      | 8.31           |
|          |           | D03  |          |                       | 266    |      |       | 287                         |                          |                |
| U004     |           | E03  | 4        | N/A                   | 308    | 313  | 2.26  | 326                         | 330                      | 1.89           |
|          |           | E04  |          |                       | 318    |      |       | 335                         |                          |                |
| U005     |           | F03  | 4        | N/A                   | 703    | 758  | 10.3  | 620                         | 654                      | 7.52           |
|          |           | F04  |          |                       | 813    |      |       | 689                         |                          |                |
| U006     |           | G03  | 4        | N/A                   | 256    | 263  | 3.5   | 278                         | 284                      | 3.08           |
|          |           | G04  |          |                       | 269    |      |       | 290                         |                          |                |
| U007     |           | H03  | 4        | N/A                   | 565    | 645  | 17.5  | 526                         | 580                      | 13.1           |
|          |           | H04  |          |                       | 725    |      |       | 634                         |                          |                |
| U008     | Total Tau | A06  | 4        | N/A                   | 286    | 287  | 0.493 | 306                         | 307                      | 0.423          |
|          |           | A05  |          |                       | 288    |      |       | 308                         |                          |                |
| U009     |           | B06  | 4        | N/A                   | 884    | 830  | 9.29  | 732                         | 699                      | 6.75           |
|          |           | B05  |          |                       | 775    |      |       | 665                         |                          |                |

Plate: Plate\_\*25C4TAL4719\*

| Sample * | Assay | Well | Dilution | Concentration (pg/ml) | Signal | Mean | CV    | Calc. Concentration (pg/ml) | Calc. Conc. Mean (pg/ml) | Calc. Conc. CV |
|----------|-------|------|----------|-----------------------|--------|------|-------|-----------------------------|--------------------------|----------------|
| U010     |       | C05  | 4        | N/A                   | 295    | 294  | 0.481 | 314                         | 313                      | 0.41           |
|          |       | C06  |          |                       | 293    |      |       | 312                         |                          |                |
| U011     |       | D05  | 4        | N/A                   | 267    | 282  | 7.52  | 288                         | 302                      | 6.49           |
|          |       | D06  |          |                       | 297    |      |       | 316                         |                          |                |
| U012     |       | E06  | 4        | N/A                   | 301    | 293  | 3.86  | 319                         | 312                      | 3.29           |
|          |       | E05  |          |                       | 285    |      |       | 305                         |                          |                |
| U013     |       | F06  | 4        | N/A                   | 239    | 232  | 4.27  | 261                         | 254                      | 3.92           |
|          |       | F05  |          |                       | 225    |      |       | 247                         |                          |                |
| U014     |       | G06  | 4        | N/A                   | 278    | 272  | 3.12  | 298                         | 293                      | 2.72           |
|          |       | G05  |          |                       | 266    |      |       | 287                         |                          |                |
| U015     |       | H06  | 4        | N/A                   | 223    | 209  | 9.47  | 245                         | 230                      | 9.1            |
|          |       | H05  |          |                       | 195    |      |       | 215                         |                          |                |
| U016     |       | A08  | 4        | N/A                   | 972    | 958  | 2.14  | 784                         | 776                      | 1.54           |
|          |       | A07  |          |                       | 943    |      |       | 767                         |                          |                |
| U017     |       | B07  | 4        | N/A                   | 901    | 930  | 4.41  | 742                         | 759                      | 3.18           |
|          |       | B08  |          |                       | 959    |      |       | 776                         |                          |                |
| U018     |       | C07  | 4        | N/A                   | 1014   | 1034 | 2.74  | 808                         | 820                      | 1.96           |
|          |       | C08  |          |                       | 1054   |      |       | 831                         |                          |                |
| U019     |       | D07  | 4        | N/A                   | 954    | 983  | 4.17  | 774                         | 790                      | 3              |
|          |       | D08  |          |                       | 1012   |      |       | 807                         |                          |                |
| U020     |       | E07  | 4        | N/A                   | 929    | 938  | 1.36  | 759                         | 764                      | 0.977          |
|          |       | E08  |          |                       | 947    |      |       | 769                         |                          |                |
| U021     |       | F08  | 4        | N/A                   | 1027   | 1012 | 2.1   | 816                         | 807                      | 1.5            |
|          |       | F07  |          |                       | 997    |      |       | 798                         |                          |                |
| U022     |       | G07  | 4        | N/A                   | 1060   | 1064 | 0.465 | 834                         | 836                      | 0.333          |
|          |       | G08  |          |                       | 1067   |      |       | 838                         |                          |                |
| U023     |       | H07  | 4        | N/A                   | 939    | 992  | 7.56  | 765                         | 795                      | 5.42           |



Plate: Plate\_\*25C4TAL4719\*

| Sample * | Assay | Well | Dilution | Concentration (pg/ml) | Signal | Mean | CV    | Calc. Concentration (pg/ml) | Calc. Conc. Mean (pg/ml) | Calc. Conc. CV |
|----------|-------|------|----------|-----------------------|--------|------|-------|-----------------------------|--------------------------|----------------|
|          |       | H08  |          |                       | 1045   |      |       | 826                         |                          |                |
| U024     |       | A09  | 4        | N/A                   | 848    | 879  | 4.91  | 711                         | 729                      | 3.55           |
|          |       | A10  |          |                       | 909    |      |       | 747                         |                          |                |
| U025     |       | B10  | 4        | N/A                   | 629    | 588  | 9.86  | 571                         | 542                      | 7.41           |
|          |       | B09  |          |                       | 547    |      |       | 514                         |                          |                |
| U026     |       | C10  | 4        | N/A                   | 224    | 226  | 0.941 | 246                         | 247                      | 0.874          |
|          |       | C09  |          |                       | 227    |      |       | 249                         |                          |                |
| U027     |       | D10  | 4        | N/A                   | 263    | 246  | 9.77  | 284                         | 268                      | 8.81           |
|          |       | D09  |          |                       | 229    |      |       | 251                         |                          |                |
| U028     |       | E10  | 4        | N/A                   | 310    | 304  | 3.03  | 327                         | 322                      | 2.56           |
|          |       | E09  |          |                       | 297    |      |       | 316                         |                          |                |
| U029     |       | F10  | 4        | N/A                   | 975    | 976  | 0.072 | 786                         | 786                      | 0.052          |
|          |       | F09  |          |                       | 976    |      |       | 786                         |                          |                |
| U030     |       | G10  | 4        | N/A                   | 798    | 802  | 0.618 | 680                         | 682                      | 0.45           |
|          |       | G09  |          |                       | 805    |      |       | 684                         |                          |                |
| U031     |       | H10  | 4        | N/A                   | 256    | 249  | 3.98  | 278                         | 271                      | 3.56           |
|          |       | H09  |          |                       | 242    |      |       | 264                         |                          |                |
| U032     |       | A11  | 4        | N/A                   | 265    | 261  | 2.44  | 286                         | 282                      | 2.16           |
|          |       | A12  |          |                       | 256    |      |       | 278                         |                          |                |

**Data Grid Legend**

| Name                          | Abbreviation |
|-------------------------------|--------------|
| Assay                         | A:           |
| Assay Results                 | AR:          |
| Calculated Concentration      | CC:          |
| Calculated Concentration C.V. | CCCV:        |
| Calculated Concentration Mean | CCM:         |
| Calculated Concentration S.D. | CCSD:        |
| Concentrations                | C:           |
| Detection Range               | DR:          |
| Dilutions                     | D:           |
| % Recovery                    | %R:          |
| % Recovery Mean               | %RM:         |
| Sample                        | S:           |
| Sample Group                  | SG:          |
| Signal C.V.                   | CV:          |
| Signal Mean                   | M:           |
| Signal                        | R:           |
| Signal S.D.                   | SD:          |

## Data Grid - Total Tau

|          | 1                               | 2                               | 3                 | 4                 | 5                 | 6                 | 7                  | 8                  | 9                 | 10                | 11                | 12                |
|----------|---------------------------------|---------------------------------|-------------------|-------------------|-------------------|-------------------|--------------------|--------------------|-------------------|-------------------|-------------------|-------------------|
| <b>A</b> | R: 39715<br>C: 3227<br>CC: 3118 | R: 42790<br>C: 3227<br>CC: 3358 | R: 324<br>CC: 340 | R: 346<br>CC: 359 | R: 288<br>CC: 308 | R: 286<br>CC: 306 | R: 943<br>CC: 767  | R: 972<br>CC: 784  | R: 848<br>CC: 711 | R: 909<br>CC: 747 | R: 265<br>CC: 286 | R: 256<br>CC: 278 |
| <b>B</b> | R: 10053<br>C: 1076<br>CC: 1019 | R: 11213<br>C: 1076<br>CC: 1104 | R: 195<br>CC: 215 | R: 195<br>CC: 215 | R: 775<br>CC: 665 | R: 884<br>CC: 732 | R: 901<br>CC: 742  | R: 959<br>CC: 776  | R: 547<br>CC: 514 | R: 629<br>CC: 571 | R: 255<br>CC: 277 | R: 242<br>CC: 264 |
| <b>C</b> | R: 2268<br>C: 359<br>CC: 356    | R: 2507<br>C: 359<br>CC: 382    | R: 896<br>CC: 739 | R: 956<br>CC: 775 | R: 295<br>CC: 314 | R: 293<br>CC: 312 | R: 1014<br>CC: 808 | R: 1054<br>CC: 831 | R: 227<br>CC: 249 | R: 224<br>CC: 246 | R: 68             | R: 60             |
| <b>D</b> | R: 440<br>C: 120<br>CC: 109     | R: 507<br>C: 120<br>CC: 121     | R: 266<br>CC: 287 | R: 305<br>CC: 323 | R: 267<br>CC: 288 | R: 297<br>CC: 316 | R: 954<br>CC: 774  | R: 1012<br>CC: 807 | R: 229<br>CC: 251 | R: 263<br>CC: 284 | R: 56             | R: 59             |
| <b>E</b> | R: 154<br>C: 39.8<br>CC: 41.9   | R: 162<br>C: 39.8<br>CC: 44.4   | R: 308<br>CC: 326 | R: 318<br>CC: 335 | R: 285<br>CC: 305 | R: 301<br>CC: 319 | R: 929<br>CC: 759  | R: 947<br>CC: 769  | R: 297<br>CC: 316 | R: 310<br>CC: 327 | R: 60             | R: 64             |
| <b>F</b> | R: 67<br>C: 13.3<br>CC: 4.76    | R: 82<br>C: 13.3<br>CC: 14.5    | R: 703<br>CC: 620 | R: 813<br>CC: 689 | R: 225<br>CC: 247 | R: 239<br>CC: 261 | R: 997<br>CC: 798  | R: 1027<br>CC: 816 | R: 976<br>CC: 786 | R: 975<br>CC: 786 | R: 63             | R: 61             |
| <b>G</b> | R: 74<br>C: 4.43<br>CC: 9.95    | R: 65<br>C: 4.43<br>CC: 2.68    | R: 256<br>CC: 278 | R: 269<br>CC: 290 | R: 266<br>CC: 287 | R: 278<br>CC: 298 | R: 1060<br>CC: 834 | R: 1067<br>CC: 838 | R: 805<br>CC: 684 | R: 798<br>CC: 680 | R: 880<br>CC: 730 | R: 823<br>CC: 695 |
| <b>H</b> | R: 55                           | R: 69                           | R: 565<br>CC: 526 | R: 725<br>CC: 634 | R: 195<br>CC: 215 | R: 223<br>CC: 245 | R: 939<br>CC: 765  | R: 1045<br>CC: 826 | R: 242<br>CC: 264 | R: 256<br>CC: 278 | R: 308<br>CC: 326 | R: 306<br>CC: 324 |

**Standard Data Table**

Plate: Plate\_\*25C4TAL4719\*

Assay: Total Tau

Group: Standard

| Sample * | Well | Concentration (pg/ml) | Signal | Mean  | CV   | Calc. Concentration (pg/ml) | Calc. Conc. Mean (pg/ml) | Calc. Conc. CV |
|----------|------|-----------------------|--------|-------|------|-----------------------------|--------------------------|----------------|
| S001     | A02  | 3227                  | 42790  | 41253 | 5.27 | 3358                        | 3238                     | 5.25           |
|          | A01  |                       | 39715  |       |      | 3118                        |                          |                |
| S002     | B01  | 1076                  | 10053  | 10633 | 7.71 | 1019                        | 1062                     | 5.65           |
|          | B02  |                       | 11213  |       |      | 1104                        |                          |                |
| S003     | C02  | 359                   | 2507   | 2388  | 7.08 | 382                         | 369                      | 4.94           |
|          | C01  |                       | 2268   |       |      | 356                         |                          |                |
| S004     | D02  | 120                   | 507    | 474   | 10   | 121                         | 115                      | 7.74           |
|          | D01  |                       | 440    |       |      | 109                         |                          |                |
| S005     | E01  | 39.8                  | 154    | 158   | 3.58 | 41.9                        | 43.2                     | 4              |
|          | E02  |                       | 162    |       |      | 44.4                        |                          |                |
| S006     | F01  | 13.3                  | 67     | 75    | 14.2 | 4.76                        | 9.65                     | 71.6           |
|          | F02  |                       | 82     |       |      | 14.5                        |                          |                |
| S007     | G02  | 4.43                  | 65     | 70    | 9.16 | 2.68                        | 6.32                     | 81.4           |
|          | G01  |                       | 74     |       |      | 9.95                        |                          |                |

## Standard Analysis Properties

| Name                       | Value                                             |
|----------------------------|---------------------------------------------------|
| Algorithm Parameters       |                                                   |
| Initial Top                | 41665                                             |
| Initial Bottom             | 62.6                                              |
| Initial MidPoint           | 1780                                              |
| Initial HillSlope          | 1                                                 |
| Weighting                  | 1/y^2                                             |
| Max Iteration              | 500                                               |
| Fit Statistics             |                                                   |
| RSquared                   | 1                                                 |
| Calculated Parameters      |                                                   |
| Top                        | 124856                                            |
| Bottom                     | 63.5                                              |
| MidPoint                   | 5188                                              |
| HillSlope                  | 1.5                                               |
| Detection Range Parameters |                                                   |
| Low                        | 19.2                                              |
| High                       | 3227                                              |
| Equation                   |                                                   |
| FourPL                     | $y = b_2 + \frac{b_1 - b_2}{1 + (x / b_3)^{b_4}}$ |

## Unknown Data Table

Plate: Plate\_\*25C4TAL4719\*

Assay: Total Tau

Group: Unknown

| Sample *   | Well | Signal | Mean | CV    | Calc. Concentration (pg/ml) | Calc. Conc. Mean (pg/ml) | Calc. Conc. CV |
|------------|------|--------|------|-------|-----------------------------|--------------------------|----------------|
| Control 1  | A04  | 346    | 335  | 4.64  | 359                         | 349                      | 3.83           |
|            | A03  | 324    |      |       | 340                         |                          |                |
| Control 2  | H11  | 308    | 307  | 0.461 | 326                         | 325                      | 0.388          |
|            | H12  | 306    |      |       | 324                         |                          |                |
| NAD1 Alpha | G11  | 880    | 852  | 4.73  | 730                         | 713                      | 3.43           |
|            | G12  | 823    |      |       | 695                         |                          |                |
| NCT1 Alpha | B11  | 255    | 249  | 3.7   | 277                         | 270                      | 3.32           |
|            | B12  | 242    |      |       | 264                         |                          |                |
| U001       | B03  | 195    | 195  | 0     | 215                         | 215                      | 0              |
|            | B04  | 195    |      |       | 215                         |                          |                |
| U002       | C03  | 896    | 926  | 4.58  | 739                         | 757                      | 3.3            |
|            | C04  | 956    |      |       | 775                         |                          |                |
| U003       | D04  | 305    | 286  | 9.66  | 323                         | 305                      | 8.31           |
|            | D03  | 266    |      |       | 287                         |                          |                |
| U004       | E03  | 308    | 313  | 2.26  | 326                         | 330                      | 1.89           |
|            | E04  | 318    |      |       | 335                         |                          |                |
| U005       | F03  | 703    | 758  | 10.3  | 620                         | 654                      | 7.52           |
|            | F04  | 813    |      |       | 689                         |                          |                |
| U006       | G03  | 256    | 263  | 3.5   | 278                         | 284                      | 3.08           |
|            | G04  | 269    |      |       | 290                         |                          |                |
| U007       | H03  | 565    | 645  | 17.5  | 526                         | 580                      | 13.1           |
|            | H04  | 725    |      |       | 634                         |                          |                |
| U008       | A06  | 286    | 287  | 0.493 | 306                         | 307                      | 0.423          |
|            | A05  | 288    |      |       | 308                         |                          |                |
| U009       | B06  | 884    | 830  | 9.29  | 732                         | 699                      | 6.75           |

Plate: Plate\_\*25C4TAL4719\*

Assay: Total Tau

Group: Unknown

| Sample * | Well | Signal | Mean | CV    | Calc. Concentration (pg/ml) | Calc. Conc. Mean (pg/ml) | Calc. Conc. CV |
|----------|------|--------|------|-------|-----------------------------|--------------------------|----------------|
|          | B05  | 775    |      |       | 665                         |                          |                |
| U010     | C05  | 295    | 294  | 0.481 | 314                         | 313                      | 0.41           |
|          | C06  | 293    |      |       | 312                         |                          |                |
| U011     | D05  | 267    | 282  | 7.52  | 288                         | 302                      | 6.49           |
|          | D06  | 297    |      |       | 316                         |                          |                |
| U012     | E06  | 301    | 293  | 3.86  | 319                         | 312                      | 3.29           |
|          | E05  | 285    |      |       | 305                         |                          |                |
| U013     | F06  | 239    | 232  | 4.27  | 261                         | 254                      | 3.92           |
|          | F05  | 225    |      |       | 247                         |                          |                |
| U014     | G06  | 278    | 272  | 3.12  | 298                         | 293                      | 2.72           |
|          | G05  | 266    |      |       | 287                         |                          |                |
| U015     | H06  | 223    | 209  | 9.47  | 245                         | 230                      | 9.1            |
|          | H05  | 195    |      |       | 215                         |                          |                |
| U016     | A08  | 972    | 958  | 2.14  | 784                         | 776                      | 1.54           |
|          | A07  | 943    |      |       | 767                         |                          |                |
| U017     | B07  | 901    | 930  | 4.41  | 742                         | 759                      | 3.18           |
|          | B08  | 959    |      |       | 776                         |                          |                |
| U018     | C07  | 1014   | 1034 | 2.74  | 808                         | 820                      | 1.96           |
|          | C08  | 1054   |      |       | 831                         |                          |                |
| U019     | D07  | 954    | 983  | 4.17  | 774                         | 790                      | 3              |
|          | D08  | 1012   |      |       | 807                         |                          |                |
| U020     | E07  | 929    | 938  | 1.36  | 759                         | 764                      | 0.977          |
|          | E08  | 947    |      |       | 769                         |                          |                |
| U021     | F08  | 1027   | 1012 | 2.1   | 816                         | 807                      | 1.5            |
|          | F07  | 997    |      |       | 798                         |                          |                |
| U022     | G07  | 1060   | 1064 | 0.465 | 834                         | 836                      | 0.333          |
|          | G08  | 1067   |      |       | 838                         |                          |                |

Plate: Plate\_\*25C4TAL4719\*

Assay: Total Tau

Group: Unknown

| Sample * | Well | Signal | Mean | CV    | Calc. Concentration (pg/ml) | Calc. Conc. Mean (pg/ml) | Calc. Conc. CV |
|----------|------|--------|------|-------|-----------------------------|--------------------------|----------------|
| U023     | H07  | 939    | 992  | 7.56  | 765                         | 795                      | 5.42           |
|          | H08  | 1045   |      |       | 826                         |                          |                |
| U024     | A09  | 848    | 879  | 4.91  | 711                         | 729                      | 3.55           |
|          | A10  | 909    |      |       | 747                         |                          |                |
| U025     | B10  | 629    | 588  | 9.86  | 571                         | 542                      | 7.41           |
|          | B09  | 547    |      |       | 514                         |                          |                |
| U026     | C10  | 224    | 226  | 0.941 | 246                         | 247                      | 0.874          |
|          | C09  | 227    |      |       | 249                         |                          |                |
| U027     | D10  | 263    | 246  | 9.77  | 284                         | 268                      | 8.81           |
|          | D09  | 229    |      |       | 251                         |                          |                |
| U028     | E10  | 310    | 304  | 3.03  | 327                         | 322                      | 2.56           |
|          | E09  | 297    |      |       | 316                         |                          |                |
| U029     | F10  | 975    | 976  | 0.072 | 786                         | 786                      | 0.052          |
|          | F09  | 976    |      |       | 786                         |                          |                |
| U030     | G10  | 798    | 802  | 0.618 | 680                         | 682                      | 0.45           |
|          | G09  | 805    |      |       | 684                         |                          |                |
| U031     | H10  | 256    | 249  | 3.98  | 278                         | 271                      | 3.56           |
|          | H09  | 242    |      |       | 264                         |                          |                |
| U032     | A11  | 265    | 261  | 2.44  | 286                         | 282                      | 2.16           |
|          | A12  | 256    |      |       | 278                         |                          |                |



**Blank Data Table**

Plate: Plate\_\*25C4TAL4719\*

Assay: Total Tau

Group: Blank

| Sample * | Well | Signal | Mean | CV  |
|----------|------|--------|------|-----|
| B001     | H01  | 55     | 62   | 16  |
|          | H02  | 69     |      |     |
| B002     | C11  | 68     | 61   | 5.9 |
|          | E12  | 64     |      |     |
|          | F11  | 63     |      |     |
|          | D11  | 56     |      |     |
|          | C12  | 60     |      |     |
|          | F12  | 61     |      |     |
|          | E11  | 60     |      |     |
|          | D12  | 59     |      |     |

Plot: Standard

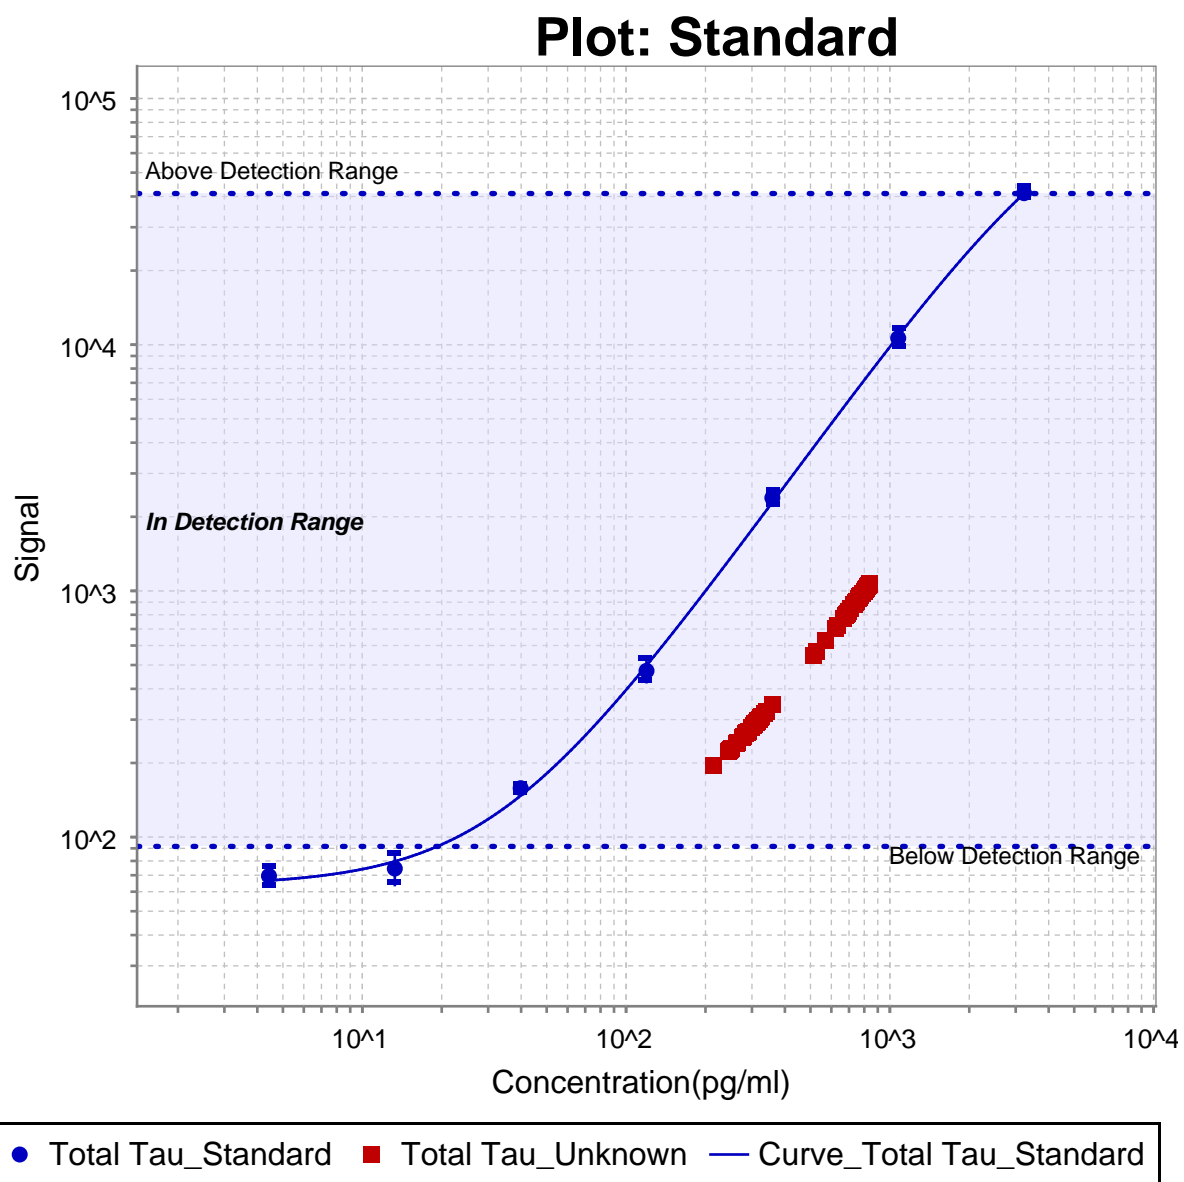

Supplement: alzrt236-S6.pdf [file alzrt236-S6.pdf]
