# Supplementary material for: Amyloid-beta 42 adsorption following serial tube transfer
Source: PubMed Central journal article supplement (PMC4059346; doi:10.1186/alzrt236), 2014-01-28

## Report Properties

Title: Experiment\_20131101152516

Author: Administrator

Creator: Administrator

Report Date: 01-Nov-2013

## Notes

**Plate Properties**

| Name           | Value                   |
|----------------|-------------------------|
| User           | Administrator           |
| Read Time      | 11/01/2013 14:57:56 GMT |
| Det Param      | Standard                |
| Type           | 96 Multi-Spot 4         |
| Wells Per Row  | 12                      |
| Wells Per Col  | 8                       |
| Spots Per Well | 4                       |
| Stack ID       | 0                       |
| Barcode1       | *25BB5AK618-*           |
| Barcode2       | N/A                     |
| Barcode3       | N/A                     |
| Plate #        | 1281                    |
| Model          | IPR                     |
| Serial #       | 1200120302692           |
| Version        | MSD_3_0_18              |
| Orient         | 0                       |
| Comments       |                         |

**20131030\_WTBioM07.2\_Ab - Assay Assignment**

Spot : &lt;a1&gt; &lt;a2&gt;

Legend : &lt;b1&gt; &lt;b2&gt;

| Assay Assignment |            |
|------------------|------------|
| Spot ID          | Assay Name |
| 1                | Abeta 1-42 |
| 2                |            |
| 3                |            |
| 4                |            |

**20131030\_WTBioM07.2\_Ab - Group Association**

| Group Association |            |                |       |
|-------------------|------------|----------------|-------|
| Assay Name        | Group Name | Back Fit Curve | Blank |
| Abeta 1-42        | Unknown    | Standard       |       |

| Group Association |            |                |       |
|-------------------|------------|----------------|-------|
| Assay Name        | Group Name | Back Fit Curve | Blank |
| Abeta 1-42        | Standard   | -              |       |
| Abeta 1-42        | Control    | Standard       |       |

## 20131030\_WTBioM07.2\_Ab - Sample Definition

|          | 1             | 2             | 3                     | 4                     | 5                | 6                | 7                | 8                | 9                | 10               | 11                     | 12                     |
|----------|---------------|---------------|-----------------------|-----------------------|------------------|------------------|------------------|------------------|------------------|------------------|------------------------|------------------------|
| <b>A</b> | S001 Standard | S001 Standard | Control 1 Unkno<br>wn | Control 1 Unkno<br>wn | U008 Unkno<br>wn | U008 Unkno<br>wn | U016 Unkno<br>wn | U016 Unkno<br>wn | U024 Unkno<br>wn | U024 Unkno<br>wn | U032 Unkno<br>wn       | U032 Unkno<br>wn       |
| <b>B</b> | S002 Standard | S002 Standard | U001 Unkno<br>wn      | U001 Unkno<br>wn      | U009 Unkno<br>wn | U009 Unkno<br>wn | U017 Unkno<br>wn | U017 Unkno<br>wn | U025 Unkno<br>wn | U025 Unkno<br>wn | NCT1 Alpha Unkno<br>wn | NCT1 Alpha Unkno<br>wn |
| <b>C</b> | S003 Standard | S003 Standard | U002 Unkno<br>wn      | U002 Unkno<br>wn      | U010 Unkno<br>wn | U010 Unkno<br>wn | U018 Unkno<br>wn | U018 Unkno<br>wn | U026 Unkno<br>wn | U026 Unkno<br>wn | STD 2 Control          | STD 2 Control          |
| <b>D</b> | S004 Standard | S004 Standard | U003 Unkno<br>wn      | U003 Unkno<br>wn      | U011 Unkno<br>wn | U011 Unkno<br>wn | U019 Unkno<br>wn | U019 Unkno<br>wn | U027 Unkno<br>wn | U027 Unkno<br>wn | STD 3 Control          | STD 3 Control          |
| <b>E</b> | S005 Standard | S005 Standard | U004 Unkno<br>wn      | U004 Unkno<br>wn      | U012 Unkno<br>wn | U012 Unkno<br>wn | U020 Unkno<br>wn | U020 Unkno<br>wn | U028 Unkno<br>wn | U028 Unkno<br>wn | STD 4 Control          | STD 4 Control          |
| <b>F</b> | S006 Standard | S006 Standard | U005 Unkno<br>wn      | U005 Unkno<br>wn      | U013 Unkno<br>wn | U013 Unkno<br>wn | U021 Unkno<br>wn | U021 Unkno<br>wn | U029 Unkno<br>wn | U029 Unkno<br>wn | STD 5 Control          | STD 5 Control          |
| <b>G</b> | S007 Standard | S007 Standard | U006 Unkno<br>wn      | U006 Unkno<br>wn      | U014 Unkno<br>wn | U014 Unkno<br>wn | U022 Unkno<br>wn | U022 Unkno<br>wn | U030 Unkno<br>wn | U030 Unkno<br>wn | NAD1 Alpha Unkno<br>wn | NAD1 Alpha Unkno<br>wn |
| <b>H</b> | B001 Blank    | B001 Blank    | U007 Unkno<br>wn      | U007 Unkno<br>wn      | U015 Unkno<br>wn | U015 Unkno<br>wn | U023 Unkno<br>wn | U023 Unkno<br>wn | U031 Unkno<br>wn | U031 Unkno<br>wn | Control 2 Unkno<br>wn  | Control 2 Unkno<br>wn  |

**20131030\_WTBioM07.2\_Ab - Abeta 1-42's Concentration/Dilution  
Definition**

|   | 1     | 2     | 3 | 4 | 5 | 6 | 7 | 8 | 9 | 10 | 11   | 12   |
|---|-------|-------|---|---|---|---|---|---|---|----|------|------|
| A | 775   | 775   | 8 | 8 | 8 | 8 | 8 | 8 | 8 | 8  | 8    | 8    |
| B | 194   | 194   | 8 | 8 | 8 | 8 | 8 | 8 | 8 | 8  | 8    | 8    |
| C | 48.4  | 48.4  | 8 | 8 | 8 | 8 | 8 | 8 | 8 | 8  | 194  | 194  |
| D | 12.1  | 12.1  | 8 | 8 | 8 | 8 | 8 | 8 | 8 | 8  | 48.4 | 48.4 |
| E | 3.03  | 3.03  | 8 | 8 | 8 | 8 | 8 | 8 | 8 | 8  | 12.1 | 12.1 |
| F | 0.757 | 0.757 | 8 | 8 | 8 | 8 | 8 | 8 | 8 | 8  | 3.03 | 3.03 |
| G | 0.189 | 0.189 | 8 | 8 | 8 | 8 | 8 | 8 | 8 | 8  | 8    | 8    |
| H |       |       | 8 | 8 | 8 | 8 | 8 | 8 | 8 | 8  | 8    | 8    |

## Plate Data Table

Plate: Plate\_\*25BB5AK618-\*

| Sample *   | Assay | Well | Dilution | Concentration (pg/ml) | Signal | Mean   | CV    | Calc. Concentration (pg/ml) | Calc. Conc. Mean (pg/ml) | Calc. Conc. CV |
|------------|-------|------|----------|-----------------------|--------|--------|-------|-----------------------------|--------------------------|----------------|
| B001       |       | H01  | N/A      | N/A                   | 131    | 127    | 5.03  | N/A                         | N/A                      | N/A            |
|            |       | H02  |          |                       | 122    |        |       | N/A                         |                          |                |
| Control 1  |       | A04  | 8        | N/A                   | 6286   | 5912   | 8.96  | 312                         | 298                      | 6.58           |
|            |       | A03  |          |                       | 5537   |        |       | 284                         |                          |                |
| Control 2  |       | H11  | 8        | N/A                   | 5057   | 5177   | 3.28  | 266                         | 270                      | 2.41           |
|            |       | H12  |          |                       | 5297   |        |       | 275                         |                          |                |
| NAD1 Alpha |       | G11  | 8        | N/A                   | 6138   | 5428   | 18.5  | 306                         | 279                      | 13.6           |
|            |       | G12  |          |                       | 4717   |        |       | 253                         |                          |                |
| NCT1 Alpha |       | B11  | 8        | N/A                   | 10266  | 9460   | 12.1  | 446                         | 420                      | 8.82           |
|            |       | B12  |          |                       | 8653   |        |       | 394                         |                          |                |
| S001       |       | A02  | N/A      | 775                   | 276526 | 283329 | 3.4   | 754                         | 773                      | 3.5            |
|            |       | A01  |          |                       | 290131 |        |       | 792                         |                          |                |
| S002       |       | B01  | N/A      | 194                   | 49827  | 55575  | 14.6  | 179                         | 194                      | 11.1           |
|            |       | B02  |          |                       | 61322  |        |       | 209                         |                          |                |
| S003       |       | C02  | N/A      | 48.4                  | 9073   | 9257   | 2.8   | 51                          | 51.7                     | 2.05           |
|            |       | C01  |          |                       | 9440   |        |       | 52.5                        |                          |                |
| S004       |       | D02  | N/A      | 12.1                  | 1280   | 1163   | 14.3  | 11.7                        | 10.8                     | 11.6           |
|            |       | D01  |          |                       | 1045   |        |       | 9.94                        |                          |                |
| S005       |       | E01  | N/A      | 3.03                  | 356    | 359    | 0.986 | 3.61                        | 3.64                     | 1.14           |
|            |       | E02  |          |                       | 361    |        |       | 3.67                        |                          |                |
| S006       |       | F01  | N/A      | 0.757                 | 163    | 173    | 7.79  | 0.793                       | 0.982                    | 27.2           |
|            |       | F02  |          |                       | 182    |        |       | 1.17                        |                          |                |
| S007       |       | G02  | N/A      | 0.189                 | 129    | 130    | 0.546 | 0                           | 0                        | N/A            |

Plate: Plate\_\*25BB5AK618-\*

| Sample * | Assay      | Well | Dilution | Concentration (pg/ml) | Signal | Mean  | CV    | Calc. Concentration (pg/ml) | Calc. Conc. Mean (pg/ml) | Calc. Conc. CV |
|----------|------------|------|----------|-----------------------|--------|-------|-------|-----------------------------|--------------------------|----------------|
|          |            | G01  |          |                       | 130    |       |       | 0                           |                          |                |
| STD 2    |            | C11  | N/A      | 194                   | 48997  | 50054 | 2.99  | 177                         | 179                      | 2.26           |
|          |            | C12  |          |                       | 51110  |       |       | 182                         |                          |                |
| STD 3    |            | D11  | N/A      | 48.4                  | 8042   | 7938  | 1.85  | 46.7                        | 46.2                     | 1.35           |
|          |            | D12  |          |                       | 7834   |       |       | 45.8                        |                          |                |
| STD 4    |            | E12  | N/A      | 12.1                  | 1308   | 1270  | 4.29  | 11.9                        | 11.6                     | 3.43           |
|          |            | E11  |          |                       | 1231   |       |       | 11.4                        |                          |                |
| STD 5    |            | F11  | N/A      | 3.03                  | 354    | 353   | 0.401 | 3.58                        | 3.57                     | 0.466          |
|          |            | F12  |          |                       | 352    |       |       | 3.56                        |                          |                |
| U001     |            | B03  | 8        | N/A                   | 1197   | 1199  | 0.177 | 88.8                        | 88.9                     | 0.143          |
|          |            | B04  |          |                       | 1200   |       |       | 89                          |                          |                |
| U002     |            | C03  | 8        | N/A                   | 4123   | 4106  | 0.603 | 229                         | 228                      | 0.446          |
|          |            | C04  |          |                       | 4088   |       |       | 227                         |                          |                |
| U003     |            | D04  | 8        | N/A                   | 2959   | 3265  | 13.2  | 179                         | 192                      | 9.89           |
|          |            | D03  |          |                       | 3570   |       |       | 205                         |                          |                |
| U004     |            | E03  | 8        | N/A                   | 4060   | 4358  | 9.66  | 226                         | 238                      | 7.14           |
|          |            | E04  |          |                       | 4655   |       |       | 250                         |                          |                |
| U005     |            | F03  | 8        | N/A                   | 8014   | 8160  | 2.53  | 373                         | 377                      | 1.85           |
|          |            | F04  |          |                       | 8306   |       |       | 382                         |                          |                |
| U006     |            | G03  | 8        | N/A                   | 1283   | 1166  | 14.2  | 93.9                        | 86.8                     | 11.5           |
|          |            | G04  |          |                       | 1049   |       |       | 79.8                        |                          |                |
| U007     |            | H03  | 8        | N/A                   | 8563   | 8763  | 3.22  | 391                         | 398                      | 2.35           |
|          |            | H04  |          |                       | 8962   |       |       | 404                         |                          |                |
| U008     | Abeta 1-42 | A06  | 8        | N/A                   | 12124  | 12196 | 0.829 | 504                         | 506                      | 0.605          |
|          |            | A05  |          |                       | 12267  |       |       | 508                         |                          |                |
| U009     |            | B06  | 8        | N/A                   | 4758   | 4549  | 6.5   | 254                         | 246                      | 4.8            |
|          |            | B05  |          |                       | 4340   |       |       | 237                         |                          |                |

Plate: Plate\_\*25BB5AK618-\*

| Sample * | Assay | Well | Dilution | Concentration (pg/ml) | Signal | Mean  | CV    | Calc. Concentration (pg/ml) | Calc. Conc. Mean (pg/ml) | Calc. Conc. CV |
|----------|-------|------|----------|-----------------------|--------|-------|-------|-----------------------------|--------------------------|----------------|
| U010     |       | C05  | 8        | N/A                   | 5429   | 5069  | 10.1  | 280                         | 266                      | 7.41           |
|          |       | C06  |          |                       | 4708   |       |       | 252                         |                          |                |
| U011     |       | D05  | 8        | N/A                   | 12694  | 13669 | 10.1  | 521                         | 550                      | 7.37           |
|          |       | D06  |          |                       | 14644  |       |       | 579                         |                          |                |
| U012     |       | E06  | 8        | N/A                   | 6996   | 7748  | 13.7  | 337                         | 363                      | 10.1           |
|          |       | E05  |          |                       | 8500   |       |       | 389                         |                          |                |
| U013     |       | F06  | 8        | N/A                   | 2473   | 2350  | 7.43  | 156                         | 150                      | 5.64           |
|          |       | F05  |          |                       | 2226   |       |       | 144                         |                          |                |
| U014     |       | G06  | 8        | N/A                   | 1700   | 1790  | 7.07  | 117                         | 122                      | 5.47           |
|          |       | G05  |          |                       | 1879   |       |       | 127                         |                          |                |
| U015     |       | H06  | 8        | N/A                   | 1327   | 1243  | 9.62  | 96.4                        | 91.4                     | 7.72           |
|          |       | H05  |          |                       | 1158   |       |       | 86.4                        |                          |                |
| U016     |       | A08  | 8        | N/A                   | 7081   | 6773  | 6.44  | 340                         | 329                      | 4.72           |
|          |       | A07  |          |                       | 6464   |       |       | 318                         |                          |                |
| U017     |       | B07  | 8        | N/A                   | 3483   | 3487  | 0.142 | 202                         | 202                      | 0.106          |
|          |       | B08  |          |                       | 3490   |       |       | 202                         |                          |                |
| U018     |       | C07  | 8        | N/A                   | 8832   | 8860  | 0.447 | 400                         | 401                      | 0.326          |
|          |       | C08  |          |                       | 8888   |       |       | 402                         |                          |                |
| U019     |       | D07  | 8        | N/A                   | 1779   | 1844  | 4.99  | 121                         | 125                      | 3.84           |
|          |       | D08  |          |                       | 1909   |       |       | 128                         |                          |                |
| U020     |       | E07  | 8        | N/A                   | 6557   | 7160  | 11.9  | 322                         | 343                      | 8.73           |
|          |       | E08  |          |                       | 7763   |       |       | 364                         |                          |                |
| U021     |       | F08  | 8        | N/A                   | 6925   | 6187  | 16.9  | 335                         | 308                      | 12.4           |
|          |       | F07  |          |                       | 5448   |       |       | 281                         |                          |                |
| U022     |       | G07  | 8        | N/A                   | 6903   | 7357  | 8.72  | 334                         | 350                      | 6.38           |
|          |       | G08  |          |                       | 7810   |       |       | 366                         |                          |                |
| U023     |       | H07  | 8        | N/A                   | 5321   | 5056  | 7.41  | 276                         | 266                      | 5.46           |



Plate: Plate\_\*25BB5AK618-\*

| Sample * | Assay | Well | Dilution | Concentration (pg/ml) | Signal | Mean  | CV   | Calc. Concentration (pg/ml) | Calc. Conc. Mean (pg/ml) | Calc. Conc. CV |
|----------|-------|------|----------|-----------------------|--------|-------|------|-----------------------------|--------------------------|----------------|
|          |       | H08  |          |                       | 4791   |       |      | 255                         |                          |                |
| U024     |       | A09  | 8        | N/A                   | 785    | 797   | 2.04 | 62.5                        | 63.3                     | 1.76           |
|          |       | A10  |          |                       | 808    |       |      | 64.1                        |                          |                |
| U025     |       | B10  | 8        | N/A                   | 11340  | 11465 | 1.54 | 480                         | 484                      | 1.13           |
|          |       | B09  |          |                       | 11590  |       |      | 488                         |                          |                |
| U026     |       | C10  | 8        | N/A                   | 15534  | 14904 | 5.98 | 604                         | 586                      | 4.37           |
|          |       | C09  |          |                       | 14274  |       |      | 568                         |                          |                |
| U027     |       | D10  | 8        | N/A                   | 1691   | 1803  | 8.78 | 117                         | 123                      | 6.79           |
|          |       | D09  |          |                       | 1915   |       |      | 128                         |                          |                |
| U028     |       | E10  | 8        | N/A                   | 12883  | 13671 | 8.15 | 527                         | 550                      | 5.95           |
|          |       | E09  |          |                       | 14458  |       |      | 573                         |                          |                |
| U029     |       | F10  | 8        | N/A                   | 10997  | 11207 | 2.65 | 469                         | 476                      | 1.93           |
|          |       | F09  |          |                       | 11417  |       |      | 482                         |                          |                |
| U030     |       | G10  | 8        | N/A                   | 13432  | 13815 | 3.92 | 543                         | 554                      | 2.86           |
|          |       | G09  |          |                       | 14198  |       |      | 566                         |                          |                |
| U031     |       | H10  | 8        | N/A                   | 1021   | 1006  | 2.11 | 78                          | 77.1                     | 1.74           |
|          |       | H09  |          |                       | 991    |       |      | 76.1                        |                          |                |
| U032     |       | A11  | 8        | N/A                   | 6960   | 7223  | 5.14 | 336                         | 345                      | 3.76           |
|          |       | A12  |          |                       | 7485   |       |      | 354                         |                          |                |

**Data Grid Legend**

| Name                          | Abbreviation |
|-------------------------------|--------------|
| Assay                         | A:           |
| Assay Results                 | AR:          |
| Calculated Concentration      | CC:          |
| Calculated Concentration C.V. | CCCV:        |
| Calculated Concentration Mean | CCM:         |
| Calculated Concentration S.D. | CCSD:        |
| Concentrations                | C:           |
| Detection Range               | DR:          |
| Dilutions                     | D:           |
| % Recovery                    | %R:          |
| % Recovery Mean               | %RM:         |
| Sample                        | S:           |
| Sample Group                  | SG:          |
| Signal C.V.                   | CV:          |
| Signal Mean                   | M:           |
| Signal                        | R:           |
| Signal S.D.                   | SD:          |

## Data Grid - Abeta 1-42

|          | 1                               | 2                              | 3                   | 4                   | 5                   | 6                   | 7                  | 8                  | 9                   | 10                  | 11                             | 12                             |
|----------|---------------------------------|--------------------------------|---------------------|---------------------|---------------------|---------------------|--------------------|--------------------|---------------------|---------------------|--------------------------------|--------------------------------|
| <b>A</b> | R: 290131<br>C: 775<br>CC: 792  | R: 276526<br>C: 775<br>CC: 754 | R: 5537<br>CC: 284  | R: 6286<br>CC: 312  | R: 12267<br>CC: 508 | R: 12124<br>CC: 504 | R: 6464<br>CC: 318 | R: 7081<br>CC: 340 | R: 785<br>CC: 62.5  | R: 808<br>CC: 64.1  | R: 6960<br>CC: 336             | R: 7485<br>CC: 354             |
| <b>B</b> | R: 49827<br>C: 194<br>CC: 179   | R: 61322<br>C: 194<br>CC: 209  | R: 1197<br>CC: 88.8 | R: 1200<br>CC: 89   | R: 4340<br>CC: 237  | R: 4758<br>CC: 254  | R: 3483<br>CC: 202 | R: 3490<br>CC: 202 | R: 11590<br>CC: 488 | R: 11340<br>CC: 480 | R: 10266<br>CC: 446            | R: 8653<br>CC: 394             |
| <b>C</b> | R: 9440<br>C: 48.4<br>CC: 52.5  | R: 9073<br>C: 48.4<br>CC: 51   | R: 4123<br>CC: 229  | R: 4088<br>CC: 227  | R: 5429<br>CC: 280  | R: 4708<br>CC: 252  | R: 8832<br>CC: 400 | R: 8888<br>CC: 402 | R: 14274<br>CC: 568 | R: 15534<br>CC: 604 | R: 48997<br>C: 194<br>CC: 177  | R: 51110<br>C: 194<br>CC: 182  |
| <b>D</b> | R: 1045<br>C: 12.1<br>CC: 9.94  | R: 1280<br>C: 12.1<br>CC: 11.7 | R: 3570<br>CC: 205  | R: 2959<br>CC: 179  | R: 12694<br>CC: 521 | R: 14644<br>CC: 579 | R: 1779<br>CC: 121 | R: 1909<br>CC: 128 | R: 1915<br>CC: 128  | R: 1691<br>CC: 117  | R: 8042<br>C: 48.4<br>CC: 46.7 | R: 7834<br>C: 48.4<br>CC: 45.8 |
| <b>E</b> | R: 356<br>C: 3.03<br>CC: 3.61   | R: 361<br>C: 3.03<br>CC: 3.67  | R: 4060<br>CC: 226  | R: 4655<br>CC: 250  | R: 8500<br>CC: 389  | R: 6996<br>CC: 337  | R: 6557<br>CC: 322 | R: 7763<br>CC: 364 | R: 14458<br>CC: 573 | R: 12883<br>CC: 527 | R: 1231<br>C: 12.1<br>CC: 11.4 | R: 1308<br>C: 12.1<br>CC: 11.9 |
| <b>F</b> | R: 163<br>C: 0.757<br>CC: 0.793 | R: 182<br>C: 0.757<br>CC: 1.17 | R: 8014<br>CC: 373  | R: 8306<br>CC: 382  | R: 2226<br>CC: 144  | R: 2473<br>CC: 156  | R: 5448<br>CC: 281 | R: 6925<br>CC: 335 | R: 11417<br>CC: 482 | R: 10997<br>CC: 469 | R: 354<br>C: 3.03<br>CC: 3.58  | R: 352<br>C: 3.03<br>CC: 3.56  |
| <b>G</b> | R: 130<br>C: 0.189<br>CC: 0     | R: 129<br>C: 0.189<br>CC: 0    | R: 1283<br>CC: 93.9 | R: 1049<br>CC: 79.8 | R: 1879<br>CC: 127  | R: 1700<br>CC: 117  | R: 6903<br>CC: 334 | R: 7810<br>CC: 366 | R: 14198<br>CC: 566 | R: 13432<br>CC: 543 | R: 6138<br>CC: 306             | R: 4717<br>CC: 253             |
| <b>H</b> | R: 131                          | R: 122                         | R: 8563<br>CC: 391  | R: 8962<br>CC: 404  | R: 1158<br>CC: 86.4 | R: 1327<br>CC: 96.4 | R: 5321<br>CC: 276 | R: 4791<br>CC: 255 | R: 991<br>CC: 76.1  | R: 1021<br>CC: 78   | R: 5057<br>CC: 266             | R: 5297<br>CC: 275             |

## Standard Data Table

Plate: Plate\_\*25BB5AK618-\*

Assay: Abeta 1-42

Group: Standard

| Sample * | Well | Concentration (pg/ml) | Signal | Mean   | CV    | Calc. Concentration (pg/ml) | Calc. Conc. Mean (pg/ml) | Calc. Conc. CV |
|----------|------|-----------------------|--------|--------|-------|-----------------------------|--------------------------|----------------|
| S001     | A02  | 775                   | 276526 | 283329 | 3.4   | 754                         | 773                      | 3.5            |
|          | A01  |                       | 290131 |        |       | 792                         |                          |                |
| S002     | B01  | 194                   | 49827  | 55575  | 14.6  | 179                         | 194                      | 11.1           |
|          | B02  |                       | 61322  |        |       | 209                         |                          |                |
| S003     | C02  | 48.4                  | 9073   | 9257   | 2.8   | 51                          | 51.7                     | 2.05           |
|          | C01  |                       | 9440   |        |       | 52.5                        |                          |                |
| S004     | D02  | 12.1                  | 1280   | 1163   | 14.3  | 11.7                        | 10.8                     | 11.6           |
|          | D01  |                       | 1045   |        |       | 9.94                        |                          |                |
| S005     | E01  | 3.03                  | 356    | 359    | 0.986 | 3.61                        | 3.64                     | 1.14           |
|          | E02  |                       | 361    |        |       | 3.67                        |                          |                |
| S006     | F01  | 0.757                 | 163    | 173    | 7.79  | 0.793                       | 0.982                    | 27.2           |
|          | F02  |                       | 182    |        |       | 1.17                        |                          |                |
| S007     | G02  | 0.189                 | 129    | 130    | 0.546 | 0                           | 0                        | N/A            |
|          | G01  |                       | 130    |        |       | 0                           |                          |                |

## Standard Analysis Properties

| Name                       | Value                                             |
|----------------------------|---------------------------------------------------|
| Algorithm Parameters       |                                                   |
| Initial Top                | 286162                                            |
| Initial Bottom             | 117                                               |
| Initial MidPoint           | 414                                               |
| Initial HillSlope          | 1                                                 |
| Weighting                  | 1/y^2                                             |
| Max Iteration              | 500                                               |
| Fit Statistics             |                                                   |
| RSquared                   | 1                                                 |
| Calculated Parameters      |                                                   |
| Top                        | 914810                                            |
| Bottom                     | 137                                               |
| MidPoint                   | 1369                                              |
| HillSlope                  | 1.4                                               |
| Detection Range Parameters |                                                   |
| Low                        | 0.844                                             |
| High                       | 775                                               |
| Equation                   |                                                   |
| FourPL                     | $y = b_2 + \frac{b_1 - b_2}{1 + (x / b_3)^{b_4}}$ |

## Unknown Data Table

Plate: Plate\_\*25BB5AK618-\*

Assay: Abeta 1-42

Group: Unknown

| Sample #   | Well | Signal | Mean  | CV    | Calc. Concentration (pg/ml) | Calc. Conc. Mean (pg/ml) | Calc. Conc. CV |
|------------|------|--------|-------|-------|-----------------------------|--------------------------|----------------|
| Control 1  | A04  | 6286   | 5912  | 8.96  | 312                         | 298                      | 6.58           |
|            | A03  | 5537   |       |       | 284                         |                          |                |
| Control 2  | H11  | 5057   | 5177  | 3.28  | 266                         | 270                      | 2.41           |
|            | H12  | 5297   |       |       | 275                         |                          |                |
| NAD1 Alpha | G11  | 6138   | 5428  | 18.5  | 306                         | 279                      | 13.6           |
|            | G12  | 4717   |       |       | 253                         |                          |                |
| NCT1 Alpha | B11  | 10266  | 9460  | 12.1  | 446                         | 420                      | 8.82           |
|            | B12  | 8653   |       |       | 394                         |                          |                |
| U001       | B03  | 1197   | 1199  | 0.177 | 88.8                        | 88.9                     | 0.143          |
|            | B04  | 1200   |       |       | 89                          |                          |                |
| U002       | C03  | 4123   | 4106  | 0.603 | 229                         | 228                      | 0.446          |
|            | C04  | 4088   |       |       | 227                         |                          |                |
| U003       | D04  | 2959   | 3265  | 13.2  | 179                         | 192                      | 9.89           |
|            | D03  | 3570   |       |       | 205                         |                          |                |
| U004       | E03  | 4060   | 4358  | 9.66  | 226                         | 238                      | 7.14           |
|            | E04  | 4655   |       |       | 250                         |                          |                |
| U005       | F03  | 8014   | 8160  | 2.53  | 373                         | 377                      | 1.85           |
|            | F04  | 8306   |       |       | 382                         |                          |                |
| U006       | G03  | 1283   | 1166  | 14.2  | 93.9                        | 86.8                     | 11.5           |
|            | G04  | 1049   |       |       | 79.8                        |                          |                |
| U007       | H03  | 8563   | 8763  | 3.22  | 391                         | 398                      | 2.35           |
|            | H04  | 8962   |       |       | 404                         |                          |                |
| U008       | A06  | 12124  | 12196 | 0.829 | 504                         | 506                      | 0.605          |
|            | A05  | 12267  |       |       | 508                         |                          |                |
| U009       | B06  | 4758   | 4549  | 6.5   | 254                         | 246                      | 4.8            |

Plate: Plate\_\*25BB5AK618-\*

Assay: Abeta 1-42

Group: Unknown

| Sample # | Well | Signal | Mean  | CV    | Calc. Concentration (pg/ml) | Calc. Conc. Mean (pg/ml) | Calc. Conc. CV |
|----------|------|--------|-------|-------|-----------------------------|--------------------------|----------------|
|          | B05  | 4340   |       |       | 237                         |                          |                |
| U010     | C05  | 5429   | 5069  | 10.1  | 280                         | 266                      | 7.41           |
|          | C06  | 4708   |       |       | 252                         |                          |                |
| U011     | D05  | 12694  | 13669 | 10.1  | 521                         | 550                      | 7.37           |
|          | D06  | 14644  |       |       | 579                         |                          |                |
| U012     | E06  | 6996   | 7748  | 13.7  | 337                         | 363                      | 10.1           |
|          | E05  | 8500   |       |       | 389                         |                          |                |
| U013     | F06  | 2473   | 2350  | 7.43  | 156                         | 150                      | 5.64           |
|          | F05  | 2226   |       |       | 144                         |                          |                |
| U014     | G06  | 1700   | 1790  | 7.07  | 117                         | 122                      | 5.47           |
|          | G05  | 1879   |       |       | 127                         |                          |                |
| U015     | H06  | 1327   | 1243  | 9.62  | 96.4                        | 91.4                     | 7.72           |
|          | H05  | 1158   |       |       | 86.4                        |                          |                |
| U016     | A08  | 7081   | 6773  | 6.44  | 340                         | 329                      | 4.72           |
|          | A07  | 6464   |       |       | 318                         |                          |                |
| U017     | B07  | 3483   | 3487  | 0.142 | 202                         | 202                      | 0.106          |
|          | B08  | 3490   |       |       | 202                         |                          |                |
| U018     | C07  | 8832   | 8860  | 0.447 | 400                         | 401                      | 0.326          |
|          | C08  | 8888   |       |       | 402                         |                          |                |
| U019     | D07  | 1779   | 1844  | 4.99  | 121                         | 125                      | 3.84           |
|          | D08  | 1909   |       |       | 128                         |                          |                |
| U020     | E07  | 6557   | 7160  | 11.9  | 322                         | 343                      | 8.73           |
|          | E08  | 7763   |       |       | 364                         |                          |                |
| U021     | F08  | 6925   | 6187  | 16.9  | 335                         | 308                      | 12.4           |
|          | F07  | 5448   |       |       | 281                         |                          |                |
| U022     | G07  | 6903   | 7357  | 8.72  | 334                         | 350                      | 6.38           |
|          | G08  | 7810   |       |       | 366                         |                          |                |

Plate: Plate\_\*25BB5AK618-\*

Assay: Abeta 1-42

Group: Unknown

| Sample # | Well | Signal | Mean  | CV   | Calc. Concentration (pg/ml) | Calc. Conc. Mean (pg/ml) | Calc. Conc. CV |
|----------|------|--------|-------|------|-----------------------------|--------------------------|----------------|
| U023     | H07  | 5321   | 5056  | 7.41 | 276                         | 266                      | 5.46           |
|          | H08  | 4791   |       |      | 255                         |                          |                |
| U024     | A09  | 785    | 797   | 2.04 | 62.5                        | 63.3                     | 1.76           |
|          | A10  | 808    |       |      | 64.1                        |                          |                |
| U025     | B10  | 11340  | 11465 | 1.54 | 480                         | 484                      | 1.13           |
|          | B09  | 11590  |       |      | 488                         |                          |                |
| U026     | C10  | 15534  | 14904 | 5.98 | 604                         | 586                      | 4.37           |
|          | C09  | 14274  |       |      | 568                         |                          |                |
| U027     | D10  | 1691   | 1803  | 8.78 | 117                         | 123                      | 6.79           |
|          | D09  | 1915   |       |      | 128                         |                          |                |
| U028     | E10  | 12883  | 13671 | 8.15 | 527                         | 550                      | 5.95           |
|          | E09  | 14458  |       |      | 573                         |                          |                |
| U029     | F10  | 10997  | 11207 | 2.65 | 469                         | 476                      | 1.93           |
|          | F09  | 11417  |       |      | 482                         |                          |                |
| U030     | G10  | 13432  | 13815 | 3.92 | 543                         | 554                      | 2.86           |
|          | G09  | 14198  |       |      | 566                         |                          |                |
| U031     | H10  | 1021   | 1006  | 2.11 | 78                          | 77.1                     | 1.74           |
|          | H09  | 991    |       |      | 76.1                        |                          |                |
| U032     | A11  | 6960   | 7223  | 5.14 | 336                         | 345                      | 3.76           |
|          | A12  | 7485   |       |      | 354                         |                          |                |



**Blank Data Table**

Plate: Plate\_\*25BB5AK618-\*

Assay: Abeta 1-42

Group: Blank

| Sample * | Well | Signal | Mean | CV   |
|----------|------|--------|------|------|
| B001     | H01  | 131    | 127  | 5.03 |
|          | H02  | 122    |      |      |

**Control Data Table**

Plate: Plate\_\*25BB5AK618-\*

Assay: Abeta 1-42

Group: Control

| Sample * | Well | Concentration (pg/ml) | Signal | Mean  | CV    | Calc. Concentration (pg/ml) | % Recovery Mean | % Recovery | Calc. Conc. Mean (pg/ml) | Calc. Conc. CV |
|----------|------|-----------------------|--------|-------|-------|-----------------------------|-----------------|------------|--------------------------|----------------|
| STD 2    | C11  | 194                   | 48997  | 50054 | 2.99  | 177                         | 92.6            | 91.1       | 179                      | 2.26           |
|          | C12  |                       | 51110  |       |       | 182                         |                 | 94.1       |                          |                |
| STD 3    | D11  | 48.4                  | 8042   | 7938  | 1.85  | 46.7                        | 95.5            | 96.4       | 46.2                     | 1.35           |
|          | D12  |                       | 7834   |       |       | 45.8                        |                 | 94.6       |                          |                |
| STD 4    | E12  | 12.1                  | 1308   | 1270  | 4.29  | 11.9                        | 96.1            | 98.4       | 11.6                     | 3.43           |
|          | E11  |                       | 1231   |       |       | 11.4                        |                 | 93.7       |                          |                |
| STD 5    | F11  | 3.03                  | 354    | 353   | 0.401 | 3.58                        | 118             | 118        | 3.57                     | 0.466          |
|          | F12  |                       | 352    |       |       | 3.56                        |                 | 118        |                          |                |

Plot: Standard

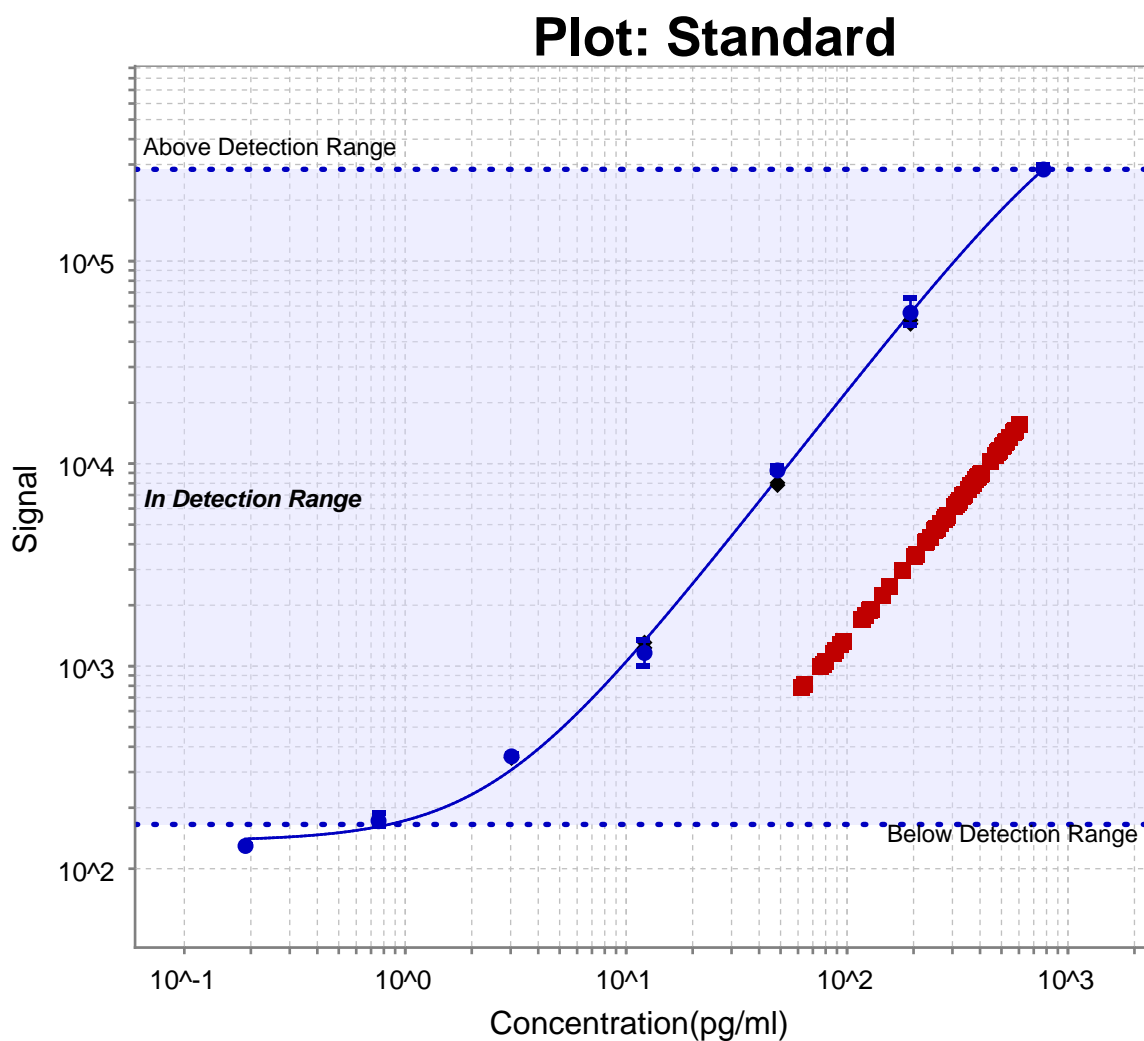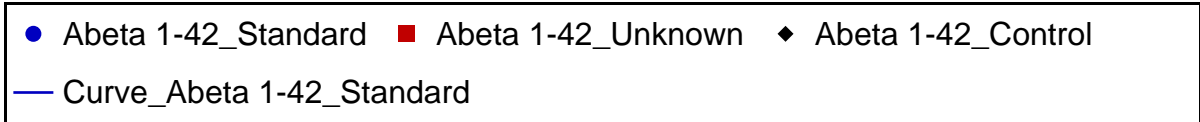

Supplement: alzrt236-S7.pdf [file alzrt236-S7.pdf]
