# Supplementary material for: Amyloid-beta 42 adsorption following serial tube transfer
Source: PubMed Central journal article supplement (PMC4059346; doi:10.1186/alzrt236), 2014-01-28

## Report Properties

Title: Experiment\_20131101152640

Author: Administrator

Creator: Administrator

Report Date: 01-Nov-2013

## Notes

**Plate Properties**

| Name           | Value                   |
|----------------|-------------------------|
| User           | Administrator           |
| Read Time      | 11/01/2013 15:22:27 GMT |
| Det Param      | Standard                |
| Type           | 96 Multi-Spot 4         |
| Wells Per Row  | 12                      |
| Wells Per Col  | 8                       |
| Spots Per Well | 4                       |
| Stack ID       | 0                       |
| Barcode1       | *25C4TA94740*           |
| Barcode2       | N/A                     |
| Barcode3       | N/A                     |
| Plate #        | 1282                    |
| Model          | IPR                     |
| Serial #       | 1200120302692           |
| Version        | MSD_3_0_18              |
| Orient         | 0                       |
| Comments       |                         |

**20131031\_WTBioM07.2\_Ttau - Assay Assignment**

Spot : &lt;a1&gt; &lt;a2&gt;

Legend : &lt;b1&gt; &lt;b2&gt;

| Assay Assignment |            |
|------------------|------------|
| Spot ID          | Assay Name |
| 1                | Total Tau  |
| 2                |            |
| 3                |            |
| 4                |            |

**20131031\_WTBioM07.2\_Ttau - Group Association**

| Group Association |            |                |       |
|-------------------|------------|----------------|-------|
| Assay Name        | Group Name | Back Fit Curve | Blank |
| Total Tau         | Unknown    | Standard       |       |

| Group Association |            |                |       |
|-------------------|------------|----------------|-------|
| Assay Name        | Group Name | Back Fit Curve | Blank |
| Total Tau         | Standard   | -              |       |

## 20131031\_WTBioM07.2\_Ttau - Sample Definition

|          | 1                    | 2                    | 3                           | 4                           | 5                   | 6                   | 7                   | 8                   | 9                   | 10                  | 11                           | 12                           |
|----------|----------------------|----------------------|-----------------------------|-----------------------------|---------------------|---------------------|---------------------|---------------------|---------------------|---------------------|------------------------------|------------------------------|
| <b>A</b> | S001<br>Standar<br>d | S001<br>Standar<br>d | Control<br>1<br>Unkno<br>wn | Control<br>1<br>Unkno<br>wn | U008<br>Unkno<br>wn | U008<br>Unkno<br>wn | U016<br>Unkno<br>wn | U016<br>Unkno<br>wn | U024<br>Unkno<br>wn | U024<br>Unkno<br>wn | U032<br>Unkno<br>wn          | U032<br>Unkno<br>wn          |
| <b>B</b> | S002<br>Standar<br>d | S002<br>Standar<br>d | U001<br>Unkno<br>wn         | U001<br>Unkno<br>wn         | U009<br>Unkno<br>wn | U009<br>Unkno<br>wn | U017<br>Unkno<br>wn | U017<br>Unkno<br>wn | U025<br>Unkno<br>wn | U025<br>Unkno<br>wn | NCT1<br>Alpha<br>Unkno<br>wn | NCT1<br>Alpha<br>Unkno<br>wn |
| <b>C</b> | S003<br>Standar<br>d | S003<br>Standar<br>d | U002<br>Unkno<br>wn         | U002<br>Unkno<br>wn         | U010<br>Unkno<br>wn | U010<br>Unkno<br>wn | U018<br>Unkno<br>wn | U018<br>Unkno<br>wn | U026<br>Unkno<br>wn | U026<br>Unkno<br>wn | B002<br>Blank                | B002<br>Blank                |
| <b>D</b> | S004<br>Standar<br>d | S004<br>Standar<br>d | U003<br>Unkno<br>wn         | U003<br>Unkno<br>wn         | U011<br>Unkno<br>wn | U011<br>Unkno<br>wn | U019<br>Unkno<br>wn | U019<br>Unkno<br>wn | U027<br>Unkno<br>wn | U027<br>Unkno<br>wn | B002<br>Blank                | B002<br>Blank                |
| <b>E</b> | S005<br>Standar<br>d | S005<br>Standar<br>d | U004<br>Unkno<br>wn         | U004<br>Unkno<br>wn         | U012<br>Unkno<br>wn | U012<br>Unkno<br>wn | U020<br>Unkno<br>wn | U020<br>Unkno<br>wn | U028<br>Unkno<br>wn | U028<br>Unkno<br>wn | B002<br>Blank                | B002<br>Blank                |
| <b>F</b> | S006<br>Standar<br>d | S006<br>Standar<br>d | U005<br>Unkno<br>wn         | U005<br>Unkno<br>wn         | U013<br>Unkno<br>wn | U013<br>Unkno<br>wn | U021<br>Unkno<br>wn | U021<br>Unkno<br>wn | U029<br>Unkno<br>wn | U029<br>Unkno<br>wn | B002<br>Blank                | B002<br>Blank                |
| <b>G</b> | S007<br>Standar<br>d | S007<br>Standar<br>d | U006<br>Unkno<br>wn         | U006<br>Unkno<br>wn         | U014<br>Unkno<br>wn | U014<br>Unkno<br>wn | U022<br>Unkno<br>wn | U022<br>Unkno<br>wn | U030<br>Unkno<br>wn | U030<br>Unkno<br>wn | NAD1<br>Alpha<br>Unkno<br>wn | NAD1<br>Alpha<br>Unkno<br>wn |
| <b>H</b> | B001<br>Blank        | B001<br>Blank        | U007<br>Unkno<br>wn         | U007<br>Unkno<br>wn         | U015<br>Unkno<br>wn | U015<br>Unkno<br>wn | U023<br>Unkno<br>wn | U023<br>Unkno<br>wn | U031<br>Unkno<br>wn | U031<br>Unkno<br>wn | Control<br>2<br>Unkno<br>wn  | Control<br>2<br>Unkno<br>wn  |

**20131031\_WTBioM07.2\_Ttau - Total Tau's Concentration/Dilution  
Definition**

|   | 1    | 2    | 3 | 4 | 5 | 6 | 7 | 8 | 9 | 10 | 11 | 12 |
|---|------|------|---|---|---|---|---|---|---|----|----|----|
| A | 3227 | 3227 | 4 | 4 | 4 | 4 | 4 | 4 | 4 | 4  | 4  | 4  |
| B | 1076 | 1076 | 4 | 4 | 4 | 4 | 4 | 4 | 4 | 4  | 4  | 4  |
| C | 359  | 359  | 4 | 4 | 4 | 4 | 4 | 4 | 4 | 4  |    |    |
| D | 120  | 120  | 4 | 4 | 4 | 4 | 4 | 4 | 4 | 4  |    |    |
| E | 39.8 | 39.8 | 4 | 4 | 4 | 4 | 4 | 4 | 4 | 4  |    |    |
| F | 13.3 | 13.3 | 4 | 4 | 4 | 4 | 4 | 4 | 4 | 4  |    |    |
| G | 4.43 | 4.43 | 4 | 4 | 4 | 4 | 4 | 4 | 4 | 4  | 4  | 4  |
| H |      |      | 4 | 4 | 4 | 4 | 4 | 4 | 4 | 4  | 4  | 4  |

## Plate Data Table

Plate: Plate\_\*25C4TA94740\*

| Sample *   | Assay | Well      | Dilution | Concentration (pg/ml) | Signal | Mean  | CV   | Calc. Concentration (pg/ml) | Calc. Conc. Mean (pg/ml) | Calc. Conc. CV |   |     |     |     |      |     |     |      |
|------------|-------|-----------|----------|-----------------------|--------|-------|------|-----------------------------|--------------------------|----------------|---|-----|-----|-----|------|-----|-----|------|
| B001       |       | H01       | N/A      | N/A                   | 60     | 64    | 8.84 | N/A                         | N/A                      | N/A            |   |     |     |     |      |     |     |      |
|            |       | H02       |          |                       | 68     |       |      | N/A                         |                          |                |   |     |     |     |      |     |     |      |
| B002       |       | C11       | N/A      | N/A                   | 60     | 58    | 12.4 | N/A                         | N/A                      | N/A            |   |     |     |     |      |     |     |      |
|            |       | E12       |          |                       | 59     |       |      | N/A                         |                          |                |   |     |     |     |      |     |     |      |
|            |       | F11       |          |                       | 54     |       |      | N/A                         |                          |                |   |     |     |     |      |     |     |      |
|            |       | D11       |          |                       | 65     |       |      | N/A                         |                          |                |   |     |     |     |      |     |     |      |
|            |       | C12       |          |                       | 60     |       |      | N/A                         |                          |                |   |     |     |     |      |     |     |      |
|            |       | F12       |          |                       | 57     |       |      | N/A                         |                          |                |   |     |     |     |      |     |     |      |
|            |       | E11       |          |                       | 42     |       |      | N/A                         |                          |                |   |     |     |     |      |     |     |      |
|            |       | D12       |          |                       | 63     |       |      | N/A                         |                          |                |   |     |     |     |      |     |     |      |
|            |       | Control 1 |          |                       |        |       |      | A04                         |                          |                | 4 | N/A | 268 | 273 | 2.34 | 253 | 257 | 2.23 |
|            |       |           |          |                       |        |       |      | A03                         |                          |                |   |     | 277 |     |      | 261 |     |      |
| Control 2  |       | H11       | 4        | N/A                   | 317    | 295   | 10.5 | 296                         | 277                      | 9.87           |   |     |     |     |      |     |     |      |
|            |       | H12       |          |                       | 273    |       |      | 257                         |                          |                |   |     |     |     |      |     |     |      |
| NAD1 Alpha |       | G11       | 4        | N/A                   | 830    | 798   | 5.67 | 669                         | 648                      | 4.56           |   |     |     |     |      |     |     |      |
|            |       | G12       |          |                       | 766    |       |      | 627                         |                          |                |   |     |     |     |      |     |     |      |
| NCT1 Alpha |       | B11       | 4        | N/A                   | 266    | 243   | 13.7 | 251                         | 229                      | 13.6           |   |     |     |     |      |     |     |      |
|            |       | B12       |          |                       | 219    |       |      | 207                         |                          |                |   |     |     |     |      |     |     |      |
| S001       |       | A02       | N/A      | 3227                  | 33366  | 31056 | 10.5 | 3466                        | 3222                     | 10.7           |   |     |     |     |      |     |     |      |
|            |       | A01       |          |                       | 28746  |       |      | 2978                        |                          |                |   |     |     |     |      |     |     |      |
| S002       |       | B01       | N/A      | 1076                  | 8836   | 9071  | 3.66 | 1064                        | 1086                     | 2.95           |   |     |     |     |      |     |     |      |
|            |       | B02       |          |                       | 9306   |       |      | 1109                        |                          |                |   |     |     |     |      |     |     |      |
| S003       |       | C02       | N/A      | 359                   | 2287   | 2171  | 7.56 | 370                         | 355                      | 5.84           |   |     |     |     |      |     |     |      |
|            |       | C01       |          |                       | 2055   |       |      | 341                         |                          |                |   |     |     |     |      |     |     |      |

Plate: Plate\_\*25C4TA94740\*

| Sample * | Assay     | Well | Dilution | Concentration (pg/ml) | Signal | Mean | CV    | Calc. Concentration (pg/ml) | Calc. Conc. Mean (pg/ml) | Calc. Conc. CV |
|----------|-----------|------|----------|-----------------------|--------|------|-------|-----------------------------|--------------------------|----------------|
| S004     |           | D02  | N/A      | 120                   | 585    | 551  | 8.86  | 126                         | 120                      | 7.4            |
|          |           | D01  |          |                       | 516    |      |       | 113                         |                          |                |
| S005     |           | E01  | N/A      | 39.8                  | 172    | 171  | 0.827 | 39.8                        | 39.5                     | 0.957          |
|          |           | E02  |          |                       | 170    |      |       | 39.2                        |                          |                |
| S006     |           | F01  | N/A      | 13.3                  | 87     | 89   | 3.18  | 13.4                        | 14.1                     | 7.71           |
|          |           | F02  |          |                       | 91     |      |       | 14.9                        |                          |                |
| S007     |           | G02  | N/A      | 4.43                  | 71     | 67   | 9.57  | 6.31                        | 3.24                     | 134            |
|          |           | G01  |          |                       | 62     |      |       | 0.167                       |                          |                |
| U001     |           | B03  | 4        | N/A                   | 164    | 169  | 4.18  | 151                         | 156                      | 4.87           |
|          |           | B04  |          |                       | 174    |      |       | 161                         |                          |                |
| U002     |           | C03  | 4        | N/A                   | 811    | 827  | 2.65  | 657                         | 667                      | 2.13           |
|          |           | C04  |          |                       | 842    |      |       | 677                         |                          |                |
| U003     |           | D04  | 4        | N/A                   | 846    | 809  | 6.56  | 679                         | 655                      | 5.27           |
|          |           | D03  |          |                       | 771    |      |       | 631                         |                          |                |
| U004     |           | E03  | 4        | N/A                   | 244    | 251  | 3.94  | 231                         | 237                      | 3.87           |
|          |           | E04  |          |                       | 258    |      |       | 244                         |                          |                |
| U005     |           | F03  | 4        | N/A                   | 915    | 910  | 0.855 | 723                         | 720                      | 0.682          |
|          |           | F04  |          |                       | 904    |      |       | 716                         |                          |                |
| U006     |           | G03  | 4        | N/A                   | 683    | 711  | 5.57  | 572                         | 590                      | 4.52           |
|          |           | G04  |          |                       | 739    |      |       | 609                         |                          |                |
| U007     |           | H03  | 4        | N/A                   | 255    | 251  | 2.54  | 241                         | 237                      | 2.49           |
|          |           | H04  |          |                       | 246    |      |       | 233                         |                          |                |
| U008     | Total Tau | A06  | 4        | N/A                   | 214    | 205  | 6.21  | 202                         | 193                      | 6.57           |
|          |           | A05  |          |                       | 196    |      |       | 184                         |                          |                |
| U009     |           | B06  | 4        | N/A                   | 849    | 813  | 6.35  | 681                         | 658                      | 5.1            |
|          |           | B05  |          |                       | 776    |      |       | 634                         |                          |                |
| U010     |           | C05  | 4        | N/A                   | 249    | 256  | 3.87  | 235                         | 242                      | 3.77           |

Plate: Plate\_\*25C4TA94740\*

| Sample * | Assay | Well | Dilution | Concentration (pg/ml) | Signal | Mean | CV    | Calc. Concentration (pg/ml) | Calc. Conc. Mean (pg/ml) | Calc. Conc. CV |
|----------|-------|------|----------|-----------------------|--------|------|-------|-----------------------------|--------------------------|----------------|
|          |       | C06  |          |                       | 263    |      |       | 248                         |                          |                |
| U011     |       | D05  | 4        | N/A                   | 260    | 262  | 1.08  | 246                         | 247                      | 1.04           |
|          |       | D06  |          |                       | 264    |      |       | 249                         |                          |                |
| U012     |       | E06  | 4        | N/A                   | 887    | 890  | 0.397 | 706                         | 707                      | 0.317          |
|          |       | E05  |          |                       | 892    |      |       | 709                         |                          |                |
| U013     |       | F06  | 4        | N/A                   | 235    | 239  | 2.37  | 222                         | 226                      | 2.36           |
|          |       | F05  |          |                       | 243    |      |       | 230                         |                          |                |
| U014     |       | G06  | 4        | N/A                   | 216    | 224  | 4.75  | 204                         | 211                      | 4.85           |
|          |       | G05  |          |                       | 231    |      |       | 218                         |                          |                |
| U015     |       | H06  | 4        | N/A                   | 191    | 190  | 0.744 | 179                         | 178                      | 0.815          |
|          |       | H05  |          |                       | 189    |      |       | 177                         |                          |                |
| U016     |       | A08  | 4        | N/A                   | 905    | 855  | 8.36  | 717                         | 685                      | 6.69           |
|          |       | A07  |          |                       | 804    |      |       | 652                         |                          |                |
| U017     |       | B07  | 4        | N/A                   | 245    | 246  | 0.288 | 232                         | 232                      | 0.284          |
|          |       | B08  |          |                       | 246    |      |       | 233                         |                          |                |
| U018     |       | C07  | 4        | N/A                   | 878    | 901  | 3.61  | 700                         | 714                      | 2.88           |
|          |       | C08  |          |                       | 924    |      |       | 729                         |                          |                |
| U019     |       | D07  | 4        | N/A                   | 730    | 773  | 7.87  | 603                         | 632                      | 6.35           |
|          |       | D08  |          |                       | 816    |      |       | 660                         |                          |                |
| U020     |       | E07  | 4        | N/A                   | 908    | 920  | 1.84  | 719                         | 727                      | 1.47           |
|          |       | E08  |          |                       | 932    |      |       | 734                         |                          |                |
| U021     |       | F08  | 4        | N/A                   | 859    | 856  | 0.496 | 688                         | 686                      | 0.397          |
|          |       | F07  |          |                       | 853    |      |       | 684                         |                          |                |
| U022     |       | G07  | 4        | N/A                   | 833    | 807  | 4.65  | 671                         | 654                      | 3.74           |
|          |       | G08  |          |                       | 780    |      |       | 637                         |                          |                |
| U023     |       | H07  | 4        | N/A                   | 824    | 816  | 1.39  | 665                         | 660                      | 1.11           |
|          |       | H08  |          |                       | 808    |      |       | 655                         |                          |                |



Plate: Plate\_\*25C4TA94740\*

| Sample * | Assay | Well | Dilution | Concentration (pg/ml) | Signal | Mean | CV    | Calc. Concentration (pg/ml) | Calc. Conc. Mean (pg/ml) | Calc. Conc. CV |
|----------|-------|------|----------|-----------------------|--------|------|-------|-----------------------------|--------------------------|----------------|
| U024     |       | A09  | 4        | N/A                   | 548    | 551  | 0.642 | 477                         | 479                      | 0.536          |
|          |       | A10  |          |                       | 553    |      |       | 480                         |                          |                |
| U025     |       | B10  | 4        | N/A                   | 289    | 274  | 7.74  | 272                         | 258                      | 7.39           |
|          |       | B09  |          |                       | 259    |      |       | 245                         |                          |                |
| U026     |       | C10  | 4        | N/A                   | 267    | 263  | 2.15  | 252                         | 248                      | 2.08           |
|          |       | C09  |          |                       | 259    |      |       | 245                         |                          |                |
| U027     |       | D10  | 4        | N/A                   | 787    | 804  | 2.9   | 641                         | 652                      | 2.33           |
|          |       | D09  |          |                       | 820    |      |       | 663                         |                          |                |
| U028     |       | E10  | 4        | N/A                   | 285    | 283  | 1.25  | 268                         | 266                      | 1.18           |
|          |       | E09  |          |                       | 280    |      |       | 264                         |                          |                |
| U029     |       | F10  | 4        | N/A                   | 274    | 276  | 1.02  | 258                         | 260                      | 0.976          |
|          |       | F09  |          |                       | 278    |      |       | 262                         |                          |                |
| U030     |       | G10  | 4        | N/A                   | 262    | 253  | 5.32  | 247                         | 239                      | 5.21           |
|          |       | G09  |          |                       | 243    |      |       | 230                         |                          |                |
| U031     |       | H10  | 4        | N/A                   | 590    | 589  | 0.24  | 507                         | 506                      | 0.199          |
|          |       | H09  |          |                       | 588    |      |       | 505                         |                          |                |
| U032     |       | A11  | 4        | N/A                   | 243    | 245  | 0.868 | 230                         | 231                      | 0.858          |
|          |       | A12  |          |                       | 246    |      |       | 233                         |                          |                |

**Data Grid Legend**

| Name                          | Abbreviation |
|-------------------------------|--------------|
| Assay                         | A:           |
| Assay Results                 | AR:          |
| Calculated Concentration      | CC:          |
| Calculated Concentration C.V. | CCCV:        |
| Calculated Concentration Mean | CCM:         |
| Calculated Concentration S.D. | CCSD:        |
| Concentrations                | C:           |
| Detection Range               | DR:          |
| Dilutions                     | D:           |
| % Recovery                    | %R:          |
| % Recovery Mean               | %RM:         |
| Sample                        | S:           |
| Sample Group                  | SG:          |
| Signal C.V.                   | CV:          |
| Signal Mean                   | M:           |
| Signal                        | R:           |
| Signal S.D.                   | SD:          |

## Data Grid - Total Tau

|          | 1                               | 2                               | 3                 | 4                 | 5                 | 6                 | 7                 | 8                 | 9                 | 10                | 11                | 12                |
|----------|---------------------------------|---------------------------------|-------------------|-------------------|-------------------|-------------------|-------------------|-------------------|-------------------|-------------------|-------------------|-------------------|
| <b>A</b> | R: 28746<br>C: 3227<br>CC: 2978 | R: 33366<br>C: 3227<br>CC: 3466 | R: 277<br>CC: 261 | R: 268<br>CC: 253 | R: 196<br>CC: 184 | R: 214<br>CC: 202 | R: 804<br>CC: 652 | R: 905<br>CC: 717 | R: 548<br>CC: 477 | R: 553<br>CC: 480 | R: 243<br>CC: 230 | R: 246<br>CC: 233 |
| <b>B</b> | R: 8836<br>C: 1076<br>CC: 1064  | R: 9306<br>C: 1076<br>CC: 1109  | R: 164<br>CC: 151 | R: 174<br>CC: 161 | R: 776<br>CC: 634 | R: 849<br>CC: 681 | R: 245<br>CC: 232 | R: 246<br>CC: 233 | R: 259<br>CC: 245 | R: 289<br>CC: 272 | R: 266<br>CC: 251 | R: 219<br>CC: 207 |
| <b>C</b> | R: 2055<br>C: 359<br>CC: 341    | R: 2287<br>C: 359<br>CC: 370    | R: 811<br>CC: 657 | R: 842<br>CC: 677 | R: 249<br>CC: 235 | R: 263<br>CC: 248 | R: 878<br>CC: 700 | R: 924<br>CC: 729 | R: 259<br>CC: 245 | R: 267<br>CC: 252 | R: 60             | R: 60             |
| <b>D</b> | R: 516<br>C: 120<br>CC: 113     | R: 585<br>C: 120<br>CC: 126     | R: 771<br>CC: 631 | R: 846<br>CC: 679 | R: 260<br>CC: 246 | R: 264<br>CC: 249 | R: 730<br>CC: 603 | R: 816<br>CC: 660 | R: 820<br>CC: 663 | R: 787<br>CC: 641 | R: 65             | R: 63             |
| <b>E</b> | R: 172<br>C: 39.8<br>CC: 39.8   | R: 170<br>C: 39.8<br>CC: 39.2   | R: 244<br>CC: 231 | R: 258<br>CC: 244 | R: 892<br>CC: 709 | R: 887<br>CC: 706 | R: 908<br>CC: 719 | R: 932<br>CC: 734 | R: 280<br>CC: 264 | R: 285<br>CC: 268 | R: 42             | R: 59             |
| <b>F</b> | R: 87<br>C: 13.3<br>CC: 13.4    | R: 91<br>C: 13.3<br>CC: 14.9    | R: 915<br>CC: 723 | R: 904<br>CC: 716 | R: 243<br>CC: 230 | R: 235<br>CC: 222 | R: 853<br>CC: 684 | R: 859<br>CC: 688 | R: 278<br>CC: 262 | R: 274<br>CC: 258 | R: 54             | R: 57             |
| <b>G</b> | R: 62<br>C: 4.43<br>CC: 0.167   | R: 71<br>C: 4.43<br>CC: 6.31    | R: 683<br>CC: 572 | R: 739<br>CC: 609 | R: 231<br>CC: 218 | R: 216<br>CC: 204 | R: 833<br>CC: 671 | R: 780<br>CC: 637 | R: 243<br>CC: 230 | R: 262<br>CC: 247 | R: 830<br>CC: 669 | R: 766<br>CC: 627 |
| <b>H</b> | R: 60                           | R: 68                           | R: 255<br>CC: 241 | R: 246<br>CC: 233 | R: 189<br>CC: 177 | R: 191<br>CC: 179 | R: 824<br>CC: 665 | R: 808<br>CC: 655 | R: 588<br>CC: 505 | R: 590<br>CC: 507 | R: 317<br>CC: 296 | R: 273<br>CC: 257 |

**Standard Data Table**

Plate: Plate\_\*25C4TA94740\*

Assay: Total Tau

Group: Standard

| Sample * | Well | Concentration (pg/ml) | Signal | Mean  | CV    | Calc. Concentration (pg/ml) | Calc. Conc. Mean (pg/ml) | Calc. Conc. CV |
|----------|------|-----------------------|--------|-------|-------|-----------------------------|--------------------------|----------------|
| S001     | A02  | 3227                  | 33366  | 31056 | 10.5  | 3466                        | 3222                     | 10.7           |
|          | A01  |                       | 28746  |       |       | 2978                        |                          |                |
| S002     | B01  | 1076                  | 8836   | 9071  | 3.66  | 1064                        | 1086                     | 2.95           |
|          | B02  |                       | 9306   |       |       | 1109                        |                          |                |
| S003     | C02  | 359                   | 2287   | 2171  | 7.56  | 370                         | 355                      | 5.84           |
|          | C01  |                       | 2055   |       |       | 341                         |                          |                |
| S004     | D02  | 120                   | 585    | 551   | 8.86  | 126                         | 120                      | 7.4            |
|          | D01  |                       | 516    |       |       | 113                         |                          |                |
| S005     | E01  | 39.8                  | 172    | 171   | 0.827 | 39.8                        | 39.5                     | 0.957          |
|          | E02  |                       | 170    |       |       | 39.2                        |                          |                |
| S006     | F01  | 13.3                  | 87     | 89    | 3.18  | 13.4                        | 14.1                     | 7.71           |
|          | F02  |                       | 91     |       |       | 14.9                        |                          |                |
| S007     | G02  | 4.43                  | 71     | 67    | 9.57  | 6.31                        | 3.24                     | 134            |
|          | G01  |                       | 62     |       |       | 0.167                       |                          |                |

## Standard Analysis Properties

| Name                       | Value                                             |
|----------------------------|---------------------------------------------------|
| Algorithm Parameters       |                                                   |
| Initial Top                | 31367                                             |
| Initial Bottom             | 59.8                                              |
| Initial MidPoint           | 1711                                              |
| Initial HillSlope          | 1                                                 |
| Weighting                  | 1/y^2                                             |
| Max Iteration              | 500                                               |
| Fit Statistics             |                                                   |
| RSquared                   | 1                                                 |
| Calculated Parameters      |                                                   |
| Top                        | 113047                                            |
| Bottom                     | 61.9                                              |
| MidPoint                   | 6592                                              |
| HillSlope                  | 1.36                                              |
| Detection Range Parameters |                                                   |
| Low                        | 15.5                                              |
| High                       | 3227                                              |
| Equation                   |                                                   |
| FourPL                     | $y = b_2 + \frac{b_1 - b_2}{1 + (x / b_3)^{b_4}}$ |

## Unknown Data Table

Plate: Plate\_\*25C4TA94740\*

Assay: Total Tau

Group: Unknown

| Sample *   | Well | Signal | Mean | CV    | Calc. Concentration (pg/ml) | Calc. Conc. Mean (pg/ml) | Calc. Conc. CV |
|------------|------|--------|------|-------|-----------------------------|--------------------------|----------------|
| Control 1  | A04  | 268    | 273  | 2.34  | 253                         | 257                      | 2.23           |
|            | A03  | 277    |      |       | 261                         |                          |                |
| Control 2  | H11  | 317    | 295  | 10.5  | 296                         | 277                      | 9.87           |
|            | H12  | 273    |      |       | 257                         |                          |                |
| NAD1 Alpha | G11  | 830    | 798  | 5.67  | 669                         | 648                      | 4.56           |
|            | G12  | 766    |      |       | 627                         |                          |                |
| NCT1 Alpha | B11  | 266    | 243  | 13.7  | 251                         | 229                      | 13.6           |
|            | B12  | 219    |      |       | 207                         |                          |                |
| U001       | B03  | 164    | 169  | 4.18  | 151                         | 156                      | 4.87           |
|            | B04  | 174    |      |       | 161                         |                          |                |
| U002       | C03  | 811    | 827  | 2.65  | 657                         | 667                      | 2.13           |
|            | C04  | 842    |      |       | 677                         |                          |                |
| U003       | D04  | 846    | 809  | 6.56  | 679                         | 655                      | 5.27           |
|            | D03  | 771    |      |       | 631                         |                          |                |
| U004       | E03  | 244    | 251  | 3.94  | 231                         | 237                      | 3.87           |
|            | E04  | 258    |      |       | 244                         |                          |                |
| U005       | F03  | 915    | 910  | 0.855 | 723                         | 720                      | 0.682          |
|            | F04  | 904    |      |       | 716                         |                          |                |
| U006       | G03  | 683    | 711  | 5.57  | 572                         | 590                      | 4.52           |
|            | G04  | 739    |      |       | 609                         |                          |                |
| U007       | H03  | 255    | 251  | 2.54  | 241                         | 237                      | 2.49           |
|            | H04  | 246    |      |       | 233                         |                          |                |
| U008       | A06  | 214    | 205  | 6.21  | 202                         | 193                      | 6.57           |
|            | A05  | 196    |      |       | 184                         |                          |                |
| U009       | B06  | 849    | 813  | 6.35  | 681                         | 658                      | 5.1            |

Plate: Plate\_\*25C4TA94740\*

Assay: Total Tau

Group: Unknown

| Sample * | Well | Signal | Mean | CV    | Calc. Concentration (pg/ml) | Calc. Conc. Mean (pg/ml) | Calc. Conc. CV |
|----------|------|--------|------|-------|-----------------------------|--------------------------|----------------|
|          | B05  | 776    |      |       | 634                         |                          |                |
| U010     | C05  | 249    | 256  | 3.87  | 235                         | 242                      | 3.77           |
|          | C06  | 263    |      |       | 248                         |                          |                |
| U011     | D05  | 260    | 262  | 1.08  | 246                         | 247                      | 1.04           |
|          | D06  | 264    |      |       | 249                         |                          |                |
| U012     | E06  | 887    | 890  | 0.397 | 706                         | 707                      | 0.317          |
|          | E05  | 892    |      |       | 709                         |                          |                |
| U013     | F06  | 235    | 239  | 2.37  | 222                         | 226                      | 2.36           |
|          | F05  | 243    |      |       | 230                         |                          |                |
| U014     | G06  | 216    | 224  | 4.75  | 204                         | 211                      | 4.85           |
|          | G05  | 231    |      |       | 218                         |                          |                |
| U015     | H06  | 191    | 190  | 0.744 | 179                         | 178                      | 0.815          |
|          | H05  | 189    |      |       | 177                         |                          |                |
| U016     | A08  | 905    | 855  | 8.36  | 717                         | 685                      | 6.69           |
|          | A07  | 804    |      |       | 652                         |                          |                |
| U017     | B07  | 245    | 246  | 0.288 | 232                         | 232                      | 0.284          |
|          | B08  | 246    |      |       | 233                         |                          |                |
| U018     | C07  | 878    | 901  | 3.61  | 700                         | 714                      | 2.88           |
|          | C08  | 924    |      |       | 729                         |                          |                |
| U019     | D07  | 730    | 773  | 7.87  | 603                         | 632                      | 6.35           |
|          | D08  | 816    |      |       | 660                         |                          |                |
| U020     | E07  | 908    | 920  | 1.84  | 719                         | 727                      | 1.47           |
|          | E08  | 932    |      |       | 734                         |                          |                |
| U021     | F08  | 859    | 856  | 0.496 | 688                         | 686                      | 0.397          |
|          | F07  | 853    |      |       | 684                         |                          |                |
| U022     | G07  | 833    | 807  | 4.65  | 671                         | 654                      | 3.74           |
|          | G08  | 780    |      |       | 637                         |                          |                |

Plate: Plate\_\*25C4TA94740\*

Assay: Total Tau

Group: Unknown

| Sample * | Well | Signal | Mean | CV    | Calc. Concentration (pg/ml) | Calc. Conc. Mean (pg/ml) | Calc. Conc. CV |
|----------|------|--------|------|-------|-----------------------------|--------------------------|----------------|
| U023     | H07  | 824    | 816  | 1.39  | 665                         | 660                      | 1.11           |
|          | H08  | 808    |      |       | 655                         |                          |                |
| U024     | A09  | 548    | 551  | 0.642 | 477                         | 479                      | 0.536          |
|          | A10  | 553    |      |       | 480                         |                          |                |
| U025     | B10  | 289    | 274  | 7.74  | 272                         | 258                      | 7.39           |
|          | B09  | 259    |      |       | 245                         |                          |                |
| U026     | C10  | 267    | 263  | 2.15  | 252                         | 248                      | 2.08           |
|          | C09  | 259    |      |       | 245                         |                          |                |
| U027     | D10  | 787    | 804  | 2.9   | 641                         | 652                      | 2.33           |
|          | D09  | 820    |      |       | 663                         |                          |                |
| U028     | E10  | 285    | 283  | 1.25  | 268                         | 266                      | 1.18           |
|          | E09  | 280    |      |       | 264                         |                          |                |
| U029     | F10  | 274    | 276  | 1.02  | 258                         | 260                      | 0.976          |
|          | F09  | 278    |      |       | 262                         |                          |                |
| U030     | G10  | 262    | 253  | 5.32  | 247                         | 239                      | 5.21           |
|          | G09  | 243    |      |       | 230                         |                          |                |
| U031     | H10  | 590    | 589  | 0.24  | 507                         | 506                      | 0.199          |
|          | H09  | 588    |      |       | 505                         |                          |                |
| U032     | A11  | 243    | 245  | 0.868 | 230                         | 231                      | 0.858          |
|          | A12  | 246    |      |       | 233                         |                          |                |



**Blank Data Table**

Plate: Plate\_\*25C4TA94740\*

Assay: Total Tau

Group: Blank

| Sample * | Well | Signal | Mean | CV   |
|----------|------|--------|------|------|
| B001     | H01  | 60     | 64   | 8.84 |
|          | H02  | 68     |      |      |
| B002     | C11  | 60     | 58   | 12.4 |
|          | E12  | 59     |      |      |
|          | F11  | 54     |      |      |
|          | D11  | 65     |      |      |
|          | C12  | 60     |      |      |
|          | F12  | 57     |      |      |
|          | E11  | 42     |      |      |
|          | D12  | 63     |      |      |

Plot: Standard

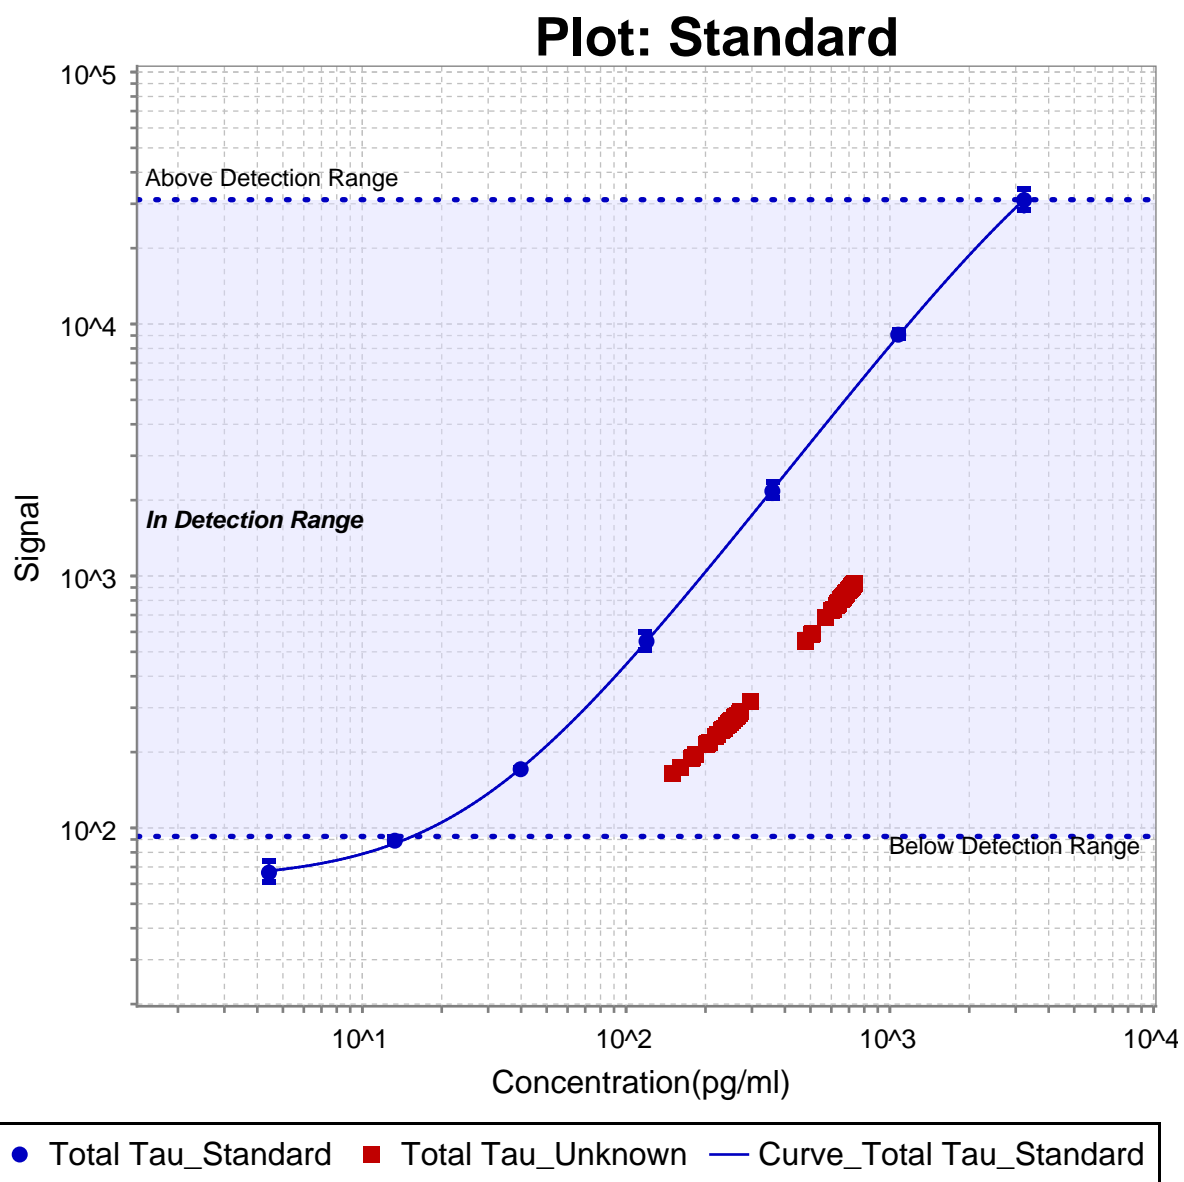

Supplement: alzrt236-S8.pdf [file alzrt236-S8.pdf]
