# Supplementary material for: Amyloid-beta 42 adsorption following serial tube transfer
Source: PubMed Central journal article supplement (PMC4059346; doi:10.1186/alzrt236), 2014-01-28

## **Report Properties**

Title: Experiment\_20131106173420

Author: Administrator

Creator: Administrator

Report Date: 06-Nov-2013

## **Notes**

**Plate Properties**

| Name           | Value                   |
|----------------|-------------------------|
| User           | Administrator           |
| Read Time      | 11/06/2013 14:45:46 GMT |
| Det Param      | Standard                |
| Type           | 96 Multi-Spot 4         |
| Wells Per Row  | 12                      |
| Wells Per Col  | 8                       |
| Spots Per Well | 4                       |
| Stack ID       | 0                       |
| Barcode1       | *25D10A5680V*           |
| Barcode2       | N/A                     |
| Barcode3       | N/A                     |
| Plate #        | 1285                    |
| Model          | IPR                     |
| Serial #       | 1200120302692           |
| Version        | MSD_3_0_18              |
| Orient         | 0                       |
| Comments       |                         |

**20131106\_WTBioM07.2\_AbTRIPLEX - Assay Assignment**

Spot : &lt;a1&gt; &lt;a2&gt;

Legend : &lt;b1&gt; &lt;b2&gt;

| Assay Assignment |            |
|------------------|------------|
| Spot ID          | Assay Name |
| 1                | Abeta 1-40 |
| 2                | Abeta 1-38 |
| 3                |            |
| 4                | Abeta 1-42 |

**20131106\_WTBioM07.2\_AbTRIPLEX - Group Association**

| Group Association |            |                |       |
|-------------------|------------|----------------|-------|
| Assay Name        | Group Name | Back Fit Curve | Blank |
| Abeta 1-38        | Unknown    | Standard       |       |

| Group Association |            |                |       |
|-------------------|------------|----------------|-------|
| Assay Name        | Group Name | Back Fit Curve | Blank |
| Abeta 1-40        | Unknown    | Standard       |       |
| Abeta 1-42        | Unknown    | Standard       |       |
| Abeta 1-38        | Standard   | -              |       |
| Abeta 1-40        | Standard   | -              |       |
| Abeta 1-42        | Standard   | -              |       |
| Abeta 1-38        | Control    | Standard       |       |
| Abeta 1-40        | Control    | Standard       |       |
| Abeta 1-42        | Control    | Standard       |       |

## 20131106\_WTBioM07.2\_AbTRIPLEX - Sample Definition

|          | 1             | 2             | 3                     | 4                     | 5                | 6                | 7                | 8                | 9                | 10               | 11                     | 12                     |
|----------|---------------|---------------|-----------------------|-----------------------|------------------|------------------|------------------|------------------|------------------|------------------|------------------------|------------------------|
| <b>A</b> | S001 Standard | S001 Standard | Control 1 Unkno<br>wn | Control 1 Unkno<br>wn | U008 Unkno<br>wn | U008 Unkno<br>wn | U016 Unkno<br>wn | U016 Unkno<br>wn | U024 Unkno<br>wn | U024 Unkno<br>wn | U032 Unkno<br>wn       | U032 Unkno<br>wn       |
| <b>B</b> | S002 Standard | S002 Standard | U001 Unkno<br>wn      | U001 Unkno<br>wn      | U009 Unkno<br>wn | U009 Unkno<br>wn | U017 Unkno<br>wn | U017 Unkno<br>wn | U025 Unkno<br>wn | U025 Unkno<br>wn | NCT1 Alpha Unkno<br>wn | NCT1 Alpha Unkno<br>wn |
| <b>C</b> | S003 Standard | S003 Standard | U002 Unkno<br>wn      | U002 Unkno<br>wn      | U010 Unkno<br>wn | U010 Unkno<br>wn | U018 Unkno<br>wn | U018 Unkno<br>wn | U026 Unkno<br>wn | U026 Unkno<br>wn | STD 2 Control          | STD 2 Control          |
| <b>D</b> | S004 Standard | S004 Standard | U003 Unkno<br>wn      | U003 Unkno<br>wn      | U011 Unkno<br>wn | U011 Unkno<br>wn | U019 Unkno<br>wn | U019 Unkno<br>wn | U027 Unkno<br>wn | U027 Unkno<br>wn | STD 3 Control          | STD 3 Control          |
| <b>E</b> | S005 Standard | S005 Standard | U004 Unkno<br>wn      | U004 Unkno<br>wn      | U012 Unkno<br>wn | U012 Unkno<br>wn | U020 Unkno<br>wn | U020 Unkno<br>wn | U028 Unkno<br>wn | U028 Unkno<br>wn | STD 4 Control          | STD 4 Control          |
| <b>F</b> | S006 Standard | S006 Standard | U005 Unkno<br>wn      | U005 Unkno<br>wn      | U013 Unkno<br>wn | U013 Unkno<br>wn | U021 Unkno<br>wn | U021 Unkno<br>wn | U029 Unkno<br>wn | U029 Unkno<br>wn | STD 5 Control          | STD 5 Control          |
| <b>G</b> | S007 Standard | S007 Standard | U006 Unkno<br>wn      | U006 Unkno<br>wn      | U014 Unkno<br>wn | U014 Unkno<br>wn | U022 Unkno<br>wn | U022 Unkno<br>wn | U030 Unkno<br>wn | U030 Unkno<br>wn | NAD1 Alpha Unkno<br>wn | NAD1 Alpha Unkno<br>wn |
| <b>H</b> | B001 Blank    | B001 Blank    | U007 Unkno<br>wn      | U007 Unkno<br>wn      | U015 Unkno<br>wn | U015 Unkno<br>wn | U023 Unkno<br>wn | U023 Unkno<br>wn | U031 Unkno<br>wn | U031 Unkno<br>wn | Control 2 Unkno<br>wn  | Control 2 Unkno<br>wn  |

**20131106\_WTBioM07.2\_AbTRIPLEX - Abeta 1-40's  
Concentration/Dilution Definition**

|   | 1     | 2     | 3 | 4 | 5 | 6 | 7 | 8 | 9 | 10 | 11   | 12   |
|---|-------|-------|---|---|---|---|---|---|---|----|------|------|
| A | 15316 | 15316 | 2 | 2 | 2 | 2 | 2 | 2 | 2 | 2  | 2    | 2    |
| B | 3829  | 3829  | 2 | 2 | 2 | 2 | 2 | 2 | 2 | 2  | 2    | 2    |
| C | 957   | 957   | 2 | 2 | 2 | 2 | 2 | 2 | 2 | 2  | 3829 | 3829 |
| D | 239   | 239   | 2 | 2 | 2 | 2 | 2 | 2 | 2 | 2  | 957  | 957  |
| E | 59.8  | 59.8  | 2 | 2 | 2 | 2 | 2 | 2 | 2 | 2  | 239  | 239  |
| F | 15    | 15    | 2 | 2 | 2 | 2 | 2 | 2 | 2 | 2  | 59.8 | 59.8 |
| G | 3.74  | 3.74  | 2 | 2 | 2 | 2 | 2 | 2 | 2 | 2  | 2    | 2    |
| H |       |       | 2 | 2 | 2 | 2 | 2 | 2 | 2 | 2  | 2    | 2    |

**20131106\_WTBioM07.2\_AbTRIPLEX - Abeta 1-38's  
Concentration/Dilution Definition**

|   | 1     | 2     | 3 | 4 | 5 | 6 | 7 | 8 | 9 | 10 | 11   | 12   |
|---|-------|-------|---|---|---|---|---|---|---|----|------|------|
| A | 10763 | 10763 | 2 | 2 | 2 | 2 | 2 | 2 | 2 | 2  | 2    | 2    |
| B | 2691  | 2691  | 2 | 2 | 2 | 2 | 2 | 2 | 2 | 2  | 2    | 2    |
| C | 673   | 673   | 2 | 2 | 2 | 2 | 2 | 2 | 2 | 2  | 2691 | 2691 |
| D | 168   | 168   | 2 | 2 | 2 | 2 | 2 | 2 | 2 | 2  | 673  | 673  |
| E | 42    | 42    | 2 | 2 | 2 | 2 | 2 | 2 | 2 | 2  | 168  | 168  |
| F | 10.5  | 10.5  | 2 | 2 | 2 | 2 | 2 | 2 | 2 | 2  | 42   | 42   |
| G | 2.63  | 2.63  | 2 | 2 | 2 | 2 | 2 | 2 | 2 | 2  | 2    | 2    |
| H |       |       | 2 | 2 | 2 | 2 | 2 | 2 | 2 | 2  | 2    | 2    |

**20131106\_WTBioM07.2\_AbTRIPLEX - Abeta 1-42's  
Concentration/Dilution Definition**

|   | 1     | 2     | 3 | 4 | 5 | 6 | 7 | 8 | 9 | 10 | 11   | 12   |
|---|-------|-------|---|---|---|---|---|---|---|----|------|------|
| A | 1379  | 1379  | 2 | 2 | 2 | 2 | 2 | 2 | 2 | 2  | 2    | 2    |
| B | 345   | 345   | 2 | 2 | 2 | 2 | 2 | 2 | 2 | 2  | 2    | 2    |
| C | 86.2  | 86.2  | 2 | 2 | 2 | 2 | 2 | 2 | 2 | 2  | 345  | 345  |
| D | 21.5  | 21.5  | 2 | 2 | 2 | 2 | 2 | 2 | 2 | 2  | 86.2 | 86.2 |
| E | 5.39  | 5.39  | 2 | 2 | 2 | 2 | 2 | 2 | 2 | 2  | 21.5 | 21.5 |
| F | 1.35  | 1.35  | 2 | 2 | 2 | 2 | 2 | 2 | 2 | 2  | 5.39 | 5.39 |
| G | 0.337 | 0.337 | 2 | 2 | 2 | 2 | 2 | 2 | 2 | 2  | 2    | 2    |
| H |       |       | 2 | 2 | 2 | 2 | 2 | 2 | 2 | 2  | 2    | 2    |

## Plate Data Table

Plate: Plate\_\*25D1OA5680V\*

| Sample *   | Assay      | Well | Dilution | Concentration (pg/ml) | Signal | Mean   | CV   | Calc. Concentration (pg/ml) | Calc. Conc. Mean (pg/ml) | Calc. Conc. CV |
|------------|------------|------|----------|-----------------------|--------|--------|------|-----------------------------|--------------------------|----------------|
| B001       | Abeta 1-38 | H02  | N/A      | N/A                   | 67     | 64     | 6.63 | N/A                         | N/A                      | N/A            |
|            |            | H01  |          |                       | 61     |        |      | N/A                         |                          |                |
|            | Abeta 1-40 | H01  | N/A      | N/A                   | 63     | 67     | 8.44 | N/A                         | N/A                      | N/A            |
|            |            | H02  |          |                       | 71     |        |      | N/A                         |                          |                |
|            | Abeta 1-42 | H01  | N/A      | N/A                   | 68     | 72     | 6.92 | N/A                         | N/A                      | N/A            |
|            |            | H02  |          |                       | 75     |        |      | N/A                         |                          |                |
| Control 1  | Abeta 1-38 | A03  | 2        | N/A                   | 13878  | 14506  | 6.12 | 1569                        | 1612                     | 3.7            |
|            |            | A04  |          |                       | 15134  |        |      | 1654                        |                          |                |
|            | Abeta 1-40 | A04  | 2        | N/A                   | 95822  | 92953  | 4.36 | 4544                        | 4445                     | 3.15           |
|            |            | A03  |          |                       | 90084  |        |      | 4346                        |                          |                |
|            | Abeta 1-42 | A04  | 2        | N/A                   | 64459  | 63924  | 1.18 | 342                         | 340                      | 0.925          |
|            |            | A03  |          |                       | 63389  |        |      | 337                         |                          |                |
| Control 2  | Abeta 1-38 | H11  | 2        | N/A                   | 13450  | 12330  | 12.8 | 1540                        | 1460                     | 7.78           |
|            |            | H12  |          |                       | 11210  |        |      | 1379                        |                          |                |
|            | Abeta 1-40 | H11  | 2        | N/A                   | 81360  | 77368  | 7.3  | 4042                        | 3900                     | 5.13           |
|            |            | H12  |          |                       | 73376  |        |      | 3759                        |                          |                |
|            | Abeta 1-42 | H12  | 2        | N/A                   | 45975  | 49688  | 10.6 | 263                         | 279                      | 8.22           |
|            |            | H11  |          |                       | 53400  |        |      | 295                         |                          |                |
| NAD1 Alpha | Abeta 1-38 | G11  | 2        | N/A                   | 43674  | 40601  | 10.7 | 3146                        | 3007                     | 6.53           |
|            |            | G12  |          |                       | 37528  |        |      | 2868                        |                          |                |
|            | Abeta 1-40 | G11  | 2        | N/A                   | 164654 | 161170 | 3.06 | 6892                        | 6772                     | 2.51           |
|            |            | G12  |          |                       | 157686 |        |      | 6652                        |                          |                |
|            | Abeta 1-42 | G12  | 2        | N/A                   | 52381  | 54863  | 6.4  | 291                         | 301                      | 4.98           |
|            |            | G11  |          |                       | 57344  |        |      | 312                         |                          |                |

Plate: Plate\_\*25D1OA5680V\*

| Sample *   | Assay      | Well | Dilution | Concentration (pg/ml) | Signal | Mean   | CV    | Calc. Concentration (pg/ml) | Calc. Conc. Mean (pg/ml) | Calc. Conc. CV |
|------------|------------|------|----------|-----------------------|--------|--------|-------|-----------------------------|--------------------------|----------------|
| NCT1 Alpha | Abeta 1-38 | B11  | 2        | N/A                   | 24194  | 23999  | 1.15  | 2197                        | 2186                     | 0.698          |
|            |            | B12  |          |                       | 23803  |        |       | 2175                        |                          |                |
|            | Abeta 1-40 | B11  | 2        | N/A                   | 97681  | 97255  | 0.619 | 4608                        | 4593                     | 0.45           |
|            |            | B12  |          |                       | 96829  |        |       | 4579                        |                          |                |
|            | Abeta 1-42 | B12  | 2        | N/A                   | 80057  | 78420  | 2.95  | 405                         | 399                      | 2.32           |
|            |            | B11  |          |                       | 76783  |        |       | 392                         |                          |                |
| S001       | Abeta 1-38 | A01  | N/A      | 10763                 | 725678 | 736292 | 2.04  | 10541                       | 10678                    | 1.81           |
|            |            | A02  |          |                       | 746906 |        |       | 10815                       |                          |                |
|            | Abeta 1-40 | A02  | N/A      | 15316                 | 552998 | 534432 | 4.91  | 19419                       | 17363                    | 16.7           |
|            |            | A01  |          |                       | 515865 |        |       | 15308                       |                          |                |
|            | Abeta 1-42 | A01  | N/A      | 1379                  | 704403 | 712600 | 1.63  | 1346                        | 1363                     | 1.77           |
|            |            | A02  |          |                       | 720796 |        |       | 1380                        |                          |                |
| S002       | Abeta 1-38 | B02  | N/A      | 2691                  | 106351 | 112625 | 7.88  | 2726                        | 2825                     | 4.96           |
|            |            | B01  |          |                       | 118898 |        |       | 2924                        |                          |                |
|            | Abeta 1-40 | B01  | N/A      | 3829                  | 171164 | 170644 | 0.431 | 3559                        | 3550                     | 0.361          |
|            |            | B02  |          |                       | 170124 |        |       | 3541                        |                          |                |
|            | Abeta 1-42 | B02  | N/A      | 345                   | 162243 | 164427 | 1.88  | 356                         | 360                      | 1.53           |
|            |            | B01  |          |                       | 166611 |        |       | 364                         |                          |                |

Plate: Plate\_\*25D1OA5680V\*

| Sample * | Assay      | Well | Dilution | Concentration (pg/ml) | Signal | Mean  | CV   | Calc. Concentration (pg/ml) | Calc. Conc. Mean (pg/ml) | Calc. Conc. CV |
|----------|------------|------|----------|-----------------------|--------|-------|------|-----------------------------|--------------------------|----------------|
| S003     | Abeta 1-38 | C01  | N/A      | 673                   | 10727  | 10381 | 4.71 | 672                         | 658                      | 2.85           |
|          |            | C02  |          |                       | 10035  |       |      | 645                         |                          |                |
|          | Abeta 1-40 | C02  | N/A      | 957                   | 27320  | 28350 | 5.14 | 972                         | 995                      | 3.33           |
|          |            | C01  |          |                       | 29380  |       |      | 1019                        |                          |                |
|          | Abeta 1-42 | C02  | N/A      | 86.2                  | 26467  | 27456 | 5.09 | 85.7                        | 88.2                     | 3.93           |
|          |            | C01  |          |                       | 28445  |       |      | 90.6                        |                          |                |
| S004     | Abeta 1-38 | D02  | N/A      | 168                   | 979    | 1035  | 7.65 | 153                         | 159                      | 4.95           |
|          |            | D01  |          |                       | 1091   |       |      | 164                         |                          |                |
|          | Abeta 1-40 | D02  | N/A      | 239                   | 3300   | 3349  | 2.07 | 254                         | 256                      | 1.32           |
|          |            | D01  |          |                       | 3398   |       |      | 258                         |                          |                |
|          | Abeta 1-42 | D02  | N/A      | 21.5                  | 3905   | 3964  | 2.1  | 19.6                        | 19.8                     | 1.64           |
|          |            | D01  |          |                       | 4023   |       |      | 20                          |                          |                |
| S005     | Abeta 1-38 | E02  | N/A      | 42                    | 206    | 210   | 2.69 | 47.8                        | 48.6                     | 2.56           |
|          |            | E01  |          |                       | 214    |       |      | 49.5                        |                          |                |
|          | Abeta 1-40 | E01  | N/A      | 59.8                  | 365    | 360   | 2.16 | 56.6                        | 55.9                     | 1.71           |
|          |            | E02  |          |                       | 354    |       |      | 55.2                        |                          |                |
|          | Abeta 1-42 | E01  | N/A      | 5.39                  | 809    | 798   | 1.95 | 5.49                        | 5.42                     | 1.68           |
|          |            | E02  |          |                       | 787    |       |      | 5.36                        |                          |                |
| S006     | Abeta 1-38 | F02  | N/A      | 10.5                  | 103    | 94    | 14.4 | 18.1                        | 13                       | 55.8           |
|          |            | F01  |          |                       | 84     |       |      | 7.84                        |                          |                |
|          | Abeta 1-40 | F01  | N/A      | 15                    | 98     | 113   | 18.8 | 10.7                        | 14.9                     | 39.7           |
|          |            | F02  |          |                       | 128    |       |      | 19.1                        |                          |                |
|          | Abeta 1-42 | F01  | N/A      | 1.35                  | 226    | 237   | 6.28 | 1.52                        | 1.61                     | 7.96           |
|          |            | F02  |          |                       | 247    |       |      | 1.7                         |                          |                |
| S007     | Abeta 1-38 | G01  | N/A      | 2.63                  | 69     | 73    | 6.83 | 0                           | 0                        | N/A            |
|          |            | G02  |          |                       | 76     |       |      | 0                           |                          |                |
|          | Abeta 1-40 | G02  | N/A      | 3.74                  | 85     | 83    | 3.41 | 5.41                        | 4.19                     | 41.2           |



Plate: Plate\_\*25D1OA5680V\*

| Sample *   | Assay      | Well       | Dilution | Concentration (pg/ml) | Signal     | Mean       | CV    | Calc. Concentration (pg/ml) | Calc. Conc. Mean (pg/ml) | Calc. Conc. CV |       |
|------------|------------|------------|----------|-----------------------|------------|------------|-------|-----------------------------|--------------------------|----------------|-------|
|            |            | G01        |          |                       | 81         |            |       | 2.97                        |                          |                |       |
|            | Abeta 1-42 | G01        | N/A      | 0.337                 | 93         | 107        | 18.5  | 0                           | 0.223                    | 141            |       |
|            |            | G02        |          |                       | 121        |            |       | 0.447                       |                          |                |       |
| STD 2      | Abeta 1-38 | C12        | N/A      | 2691                  | 10844<br>8 | 11074<br>4 | 2.93  | 2759                        | 2796                     | 1.84           |       |
|            |            | C11        |          |                       | 11303<br>9 |            |       | 2832                        |                          |                |       |
|            | Abeta 1-40 | C11        | N/A      | 3829                  | 17051<br>9 | 16135<br>3 | 8.03  | 3548                        | 3390                     | 6.6            |       |
|            |            | C12        |          |                       | 15218<br>7 |            |       | 3231                        |                          |                |       |
|            | Abeta 1-42 | C11        | N/A      | 345                   | 15693<br>1 | 15170<br>6 | 4.87  | 347                         | 337                      | 3.95           |       |
|            |            | C12        |          |                       | 14648<br>1 |            |       | 328                         |                          |                |       |
|            | STD 3      | Abeta 1-38 | D12      | N/A                   | 673        | 10787      | 10886 | 1.29                        | 674                      | 678            | 0.778 |
|            |            |            | D11      |                       |            | 10985      |       |                             | 681                      |                |       |
| Abeta 1-40 |            | D11        | N/A      | 957                   | 29500      | 29289      | 1.02  | 1022                        | 1017                     | 0.663          |       |
|            |            | D12        |          |                       | 29077      |            |       | 1012                        |                          |                |       |
| Abeta 1-42 |            | D12        | N/A      | 86.2                  | 24915      | 25212      | 1.67  | 81.8                        | 82.6                     | 1.28           |       |
|            |            | D11        |          |                       | 25509      |            |       | 83.3                        |                          |                |       |
| STD 4      | Abeta 1-38 | E11        | N/A      | 168                   | 1152       | 1111       | 5.22  | 170                         | 166                      | 3.36           |       |
|            |            | E12        |          |                       | 1070       |            |       | 162                         |                          |                |       |
|            | Abeta 1-40 | E12        | N/A      | 239                   | 3243       | 3343       | 4.21  | 251                         | 256                      | 2.68           |       |
|            |            | E11        |          |                       | 3442       |            |       | 260                         |                          |                |       |
|            | Abeta 1-42 | E11        | N/A      | 21.5                  | 3875       | 3797       | 2.91  | 19.5                        | 19.2                     | 2.27           |       |
|            |            | E12        |          |                       | 3719       |            |       | 18.9                        |                          |                |       |
|            | Abeta 1-38 | F12        | N/A      | 42                    | 206        | 213        | 4.33  | 47.8                        | 49.2                     | 4.08           |       |
|            |            | F11        |          |                       | 219        |            |       | 50.6                        |                          |                |       |

Plate: Plate\_\*25D1OA5680V\*

| Sample * | Assay      | Well | Dilution | Concentration (pg/ml) | Signal | Mean  | CV    | Calc. Concentration (pg/ml) | Calc. Conc. Mean (pg/ml) | Calc. Conc. CV |
|----------|------------|------|----------|-----------------------|--------|-------|-------|-----------------------------|--------------------------|----------------|
| STD 5    | Abeta 1-40 | F11  | N/A      | 59.8                  | 421    | 425   | 1.17  | 63.2                        | 63.6                     | 0.885          |
|          |            | F12  |          |                       | 428    |       |       | 64                          |                          |                |
|          | Abeta 1-42 | F12  | N/A      | 5.39                  | 728    | 734   | 1.06  | 5.01                        | 5.04                     | 0.925          |
|          |            | F11  |          |                       | 739    |       |       | 5.07                        |                          |                |
| U001     | Abeta 1-38 | B03  | 2        | N/A                   | 50266  | 49417 | 2.43  | 3428                        | 3392                     | 1.49           |
|          |            | B04  |          |                       | 48567  |       |       | 3357                        |                          |                |
|          | Abeta 1-40 | B03  | 2        | N/A                   | 17902  | 17611 | 2.34  | 7394                        | 7292                     | 1.98           |
|          |            | B04  |          |                       | 17320  |       |       | 7189                        |                          |                |
|          | Abeta 1-42 | B03  | 2        | N/A                   | 72740  | 72317 | 0.828 | 376                         | 374                      | 0.65           |
|          |            | B04  |          |                       | 71893  |       |       | 372                         |                          |                |
| U002     | Abeta 1-38 | C03  | 2        | N/A                   | 45799  | 46837 | 3.13  | 3238                        | 3283                     | 1.92           |
|          |            | C04  |          |                       | 47875  |       |       | 3327                        |                          |                |
|          | Abeta 1-40 | C03  | 2        | N/A                   | 16329  | 15898 | 3.84  | 6845                        | 6696                     | 3.14           |
|          |            | C04  |          |                       | 15466  |       |       | 6548                        |                          |                |
|          | Abeta 1-42 | C04  | 2        | N/A                   | 40719  | 40798 | 0.272 | 239                         | 239                      | 0.211          |
|          |            | C03  |          |                       | 40876  |       |       | 240                         |                          |                |
| U003     | Abeta 1-38 | D04  | 2        | N/A                   | 33730  | 34838 | 4.5   | 2688                        | 2741                     | 2.74           |
|          |            | D03  |          |                       | 35946  |       |       | 2794                        |                          |                |
|          | Abeta 1-40 | D04  | 2        | N/A                   | 11537  | 12365 | 9.47  | 5211                        | 5492                     | 7.23           |
|          |            | D03  |          |                       | 13192  |       |       | 5773                        |                          |                |
|          | Abeta 1-42 | D03  | 2        | N/A                   | 30420  | 29846 | 2.72  | 191                         | 188                      | 2.1            |
|          |            | D04  |          |                       | 29271  |       |       | 185                         |                          |                |
|          | Abeta 1-38 | E03  | 2        | N/A                   | 19742  | 19449 | 2.13  | 1942                        | 1925                     | 1.29           |

Plate: Plate\_\*25D1OA5680V\*

| Sample *   | Assay      | Well       | Dilution | Concentration (pg/ml) | Signal     | Mean       | CV    | Calc. Concentration (pg/ml) | Calc. Conc. Mean (pg/ml) | Calc. Conc. CV |
|------------|------------|------------|----------|-----------------------|------------|------------|-------|-----------------------------|--------------------------|----------------|
| U004       |            | E04        |          |                       | 19156      |            |       | 1907                        |                          |                |
|            | Abeta 1-40 | E03        | 2        | N/A                   | 83423      | 83274      | 0.253 | 4114                        | 4109                     | 0.18           |
|            |            | E04        |          |                       | 83125      |            |       | 4104                        |                          |                |
|            | Abeta 1-42 | E04        | 2        | N/A                   | 19510      | 19125      | 2.85  | 136                         | 134                      | 2.19           |
|            |            | E03        |          |                       | 18740      |            |       | 131                         |                          |                |
|            | U005       | Abeta 1-38 | F03      | 2                     | N/A        | 32144      | 33013 | 3.72                        | 2610                     | 2653           |
| F04        |            |            | 33881    |                       |            | 2695       |       |                             |                          |                |
| Abeta 1-40 |            | F03        | 2        | N/A                   | 12165<br>1 | 12959<br>9 | 8.67  | 5424                        | 5694                     | 6.7            |
|            |            | F04        |          |                       | 13754<br>6 |            |       | 5963                        |                          |                |
| Abeta 1-42 |            | F04        | 2        | N/A                   | 12621<br>3 | 12364<br>5 | 2.94  | 582                         | 572                      | 2.36           |
|            |            | F03        |          |                       | 12107<br>6 |            |       | 562                         |                          |                |
| U006       | Abeta 1-38 | G03        | 2        | N/A                   | 14514      | 14514      | 0.005 | 1612                        | 1612                     | 0.003          |
|            |            | G04        |          |                       | 14513      |            |       | 1612                        |                          |                |
|            | Abeta 1-40 | G03        | 2        | N/A                   | 61406      | 61038      | 0.853 | 3324                        | 3311                     | 0.582          |
|            |            | G04        |          |                       | 60670      |            |       | 3297                        |                          |                |
|            | Abeta 1-42 | G03        | 2        | N/A                   | 13349      | 13462      | 1.19  | 101                         | 102                      | 0.913          |
|            |            | G04        |          |                       | 13575      |            |       | 103                         |                          |                |
| U007       | Abeta 1-38 | H03        | 2        | N/A                   | 30518      | 30657      | 0.641 | 2529                        | 2536                     | 0.389          |
|            |            | H04        |          |                       | 30796      |            |       | 2543                        |                          |                |
|            | Abeta 1-40 | H03        | 2        | N/A                   | 12387<br>3 | 12343<br>2 | 0.505 | 5500                        | 5485                     | 0.386          |
|            |            | H04        |          |                       | 12299<br>1 |            |       | 5470                        |                          |                |
|            | Abeta 1-42 | H04        | 2        | N/A                   | 10504<br>2 | 10383<br>5 | 1.64  | 502                         | 498                      | 1.31           |

Plate: Plate\_\*25D1OA5680V\*

| Sample * | Assay      | Well | Dilution | Concentration (pg/ml) | Signal | Mean   | CV    | Calc. Concentration (pg/ml) | Calc. Conc. Mean (pg/ml) | Calc. Conc. CV |
|----------|------------|------|----------|-----------------------|--------|--------|-------|-----------------------------|--------------------------|----------------|
|          |            | H03  |          |                       | 102627 |        |       | 493                         |                          |                |
| U008     | Abeta 1-38 | A06  | 2        | N/A                   | 5824   | 5812   | 0.292 | 928                         | 927                      | 0.177          |
|          |            | A05  |          |                       | 5800   |        |       | 925                         |                          |                |
|          | Abeta 1-40 | A06  | 2        | N/A                   | 26856  | 26700  | 0.826 | 1923                        | 1915                     | 0.534          |
|          |            | A05  |          |                       | 26544  |        |       | 1908                        |                          |                |
|          | Abeta 1-42 | A05  | 2        | N/A                   | 5566   | 5603   | 0.921 | 51.6                        | 51.8                     | 0.713          |
|          |            | A06  |          |                       | 5639   |        |       | 52.1                        |                          |                |
| U009     | Abeta 1-38 | B06  | 2        | N/A                   | 23634  | 24048  | 2.43  | 2166                        | 2189                     | 1.47           |
|          |            | B05  |          |                       | 24461  |        |       | 2211                        |                          |                |
|          | Abeta 1-40 | B06  | 2        | N/A                   | 96280  | 95128  | 1.71  | 4560                        | 4520                     | 1.24           |
|          |            | B05  |          |                       | 93976  |        |       | 4481                        |                          |                |
|          | Abeta 1-42 | B05  | 2        | N/A                   | 58816  | 58458  | 0.867 | 318                         | 317                      | 0.676          |
|          |            | B06  |          |                       | 58099  |        |       | 315                         |                          |                |
| U010     | Abeta 1-38 | C05  | 2        | N/A                   | 24897  | 24758  | 0.797 | 2235                        | 2228                     | 0.483          |
|          |            | C06  |          |                       | 24618  |        |       | 2220                        |                          |                |
|          | Abeta 1-40 | C05  | 2        | N/A                   | 96127  | 94187  | 2.91  | 4555                        | 4488                     | 2.11           |
|          |            | C06  |          |                       | 92246  |        |       | 4421                        |                          |                |
|          | Abeta 1-42 | C06  | 2        | N/A                   | 22717  | 22376  | 2.16  | 152                         | 151                      | 1.66           |
|          |            | C05  |          |                       | 22035  |        |       | 149                         |                          |                |
| U011     | Abeta 1-38 | D06  | 2        | N/A                   | 51975  | 52206  | 0.626 | 3499                        | 3509                     | 0.383          |
|          |            | D05  |          |                       | 52437  |        |       | 3518                        |                          |                |
|          | Abeta 1-40 | D05  | 2        | N/A                   | 186445 | 181733 | 3.67  | 7656                        | 7490                     | 3.14           |
|          |            | D06  |          |                       | 177020 |        |       | 7323                        |                          |                |
|          | Abeta 1-42 | D06  | 2        | N/A                   | 57790  | 59240  | 3.46  | 314                         | 320                      | 2.7            |
|          |            | D05  |          |                       | 60689  |        |       | 326                         |                          |                |

Plate: Plate\_\*25D1OA5680V\*

| Sample * | Assay      | Well | Dilution | Concentration (pg/ml) | Signal | Mean   | CV    | Calc. Concentration (pg/ml) | Calc. Conc. Mean (pg/ml) | Calc. Conc. CV |
|----------|------------|------|----------|-----------------------|--------|--------|-------|-----------------------------|--------------------------|----------------|
| U012     | Abeta 1-38 | E06  | 2        | N/A                   | 56563  | 57130  | 1.4   | 3685                        | 3708                     | 0.861          |
|          |            | E05  |          |                       | 57696  |        |       | 3730                        |                          |                |
|          | Abeta 1-40 | E06  | 2        | N/A                   | 176440 | 182066 | 4.37  | 7303                        | 7502                     | 3.75           |
|          |            | E05  |          |                       | 187692 |        |       | 7700                        |                          |                |
|          | Abeta 1-42 | E06  | 2        | N/A                   | 75483  | 76555  | 1.98  | 387                         | 391                      | 1.56           |
|          |            | E05  |          |                       | 77627  |        |       | 395                         |                          |                |
| U013     | Abeta 1-38 | F05  | 2        | N/A                   | 9836   | 10027  | 2.69  | 1274                        | 1289                     | 1.63           |
|          |            | F06  |          |                       | 10218  |        |       | 1304                        |                          |                |
|          | Abeta 1-40 | F06  | 2        | N/A                   | 46181  | 45188  | 3.11  | 2743                        | 2704                     | 2.07           |
|          |            | F05  |          |                       | 44195  |        |       | 2664                        |                          |                |
|          | Abeta 1-42 | F05  | 2        | N/A                   | 24092  | 24543  | 2.6   | 159                         | 162                      | 2              |
|          |            | F06  |          |                       | 24993  |        |       | 164                         |                          |                |
| U014     | Abeta 1-38 | G06  | 2        | N/A                   | 52389  | 52944  | 1.48  | 3516                        | 3539                     | 0.908          |
|          |            | G05  |          |                       | 53498  |        |       | 3562                        |                          |                |
|          | Abeta 1-40 | G06  | 2        | N/A                   | 174309 | 178906 | 3.63  | 7228                        | 7390                     | 3.1            |
|          |            | G05  |          |                       | 183502 |        |       | 7552                        |                          |                |
|          | Abeta 1-42 | G06  | 2        | N/A                   | 70871  | 71171  | 0.595 | 368                         | 369                      | 0.467          |
|          |            | G05  |          |                       | 71470  |        |       | 371                         |                          |                |
| U015     | Abeta 1-38 | H06  | 2        | N/A                   | 4917   | 4847   | 2.06  | 837                         | 830                      | 1.25           |
|          |            | H05  |          |                       | 4776   |        |       | 822                         |                          |                |
|          | Abeta 1-40 | H06  | 2        | N/A                   | 23997  | 22731  | 7.88  | 1788                        | 1726                     | 5.07           |
|          |            | H05  |          |                       | 21465  |        |       | 1664                        |                          |                |
|          | Abeta 1-42 | H06  | 2        | N/A                   | 13134  | 13081  | 0.578 | 100                         | 99.7                     | 0.445          |
|          |            | H05  |          |                       | 13027  |        |       | 99.4                        |                          |                |

Plate: Plate\_\*25D1OA5680V\*

| Sample * | Assay      | Well | Dilution | Concentration (pg/ml) | Signal     | Mean       | CV    | Calc. Concentration (pg/ml) | Calc. Conc. Mean (pg/ml) | Calc. Conc. CV |
|----------|------------|------|----------|-----------------------|------------|------------|-------|-----------------------------|--------------------------|----------------|
| U016     | Abeta 1-38 | A08  | 2        | N/A                   | 2755       | 2795       | 2.02  | 587                         | 593                      | 1.25           |
|          |            | A07  |          |                       | 2835       |            |       | 598                         |                          |                |
|          | Abeta 1-40 | A08  | 2        | N/A                   | 14472      | 14394      | 0.766 | 1294                        | 1289                     | 0.487          |
|          |            | A07  |          |                       | 14316      |            |       | 1285                        |                          |                |
|          | Abeta 1-42 | A07  | 2        | N/A                   | 8960       | 9022       | 0.964 | 74.5                        | 74.9                     | 0.743          |
|          |            | A08  |          |                       | 9083       |            |       | 75.3                        |                          |                |
| U017     | Abeta 1-38 | B07  | 2        | N/A                   | 31883      | 32845      | 4.14  | 2597                        | 2644                     | 2.52           |
|          |            | B08  |          |                       | 33806      |            |       | 2691                        |                          |                |
|          | Abeta 1-40 | B07  | 2        | N/A                   | 13153<br>5 | 13240<br>0 | 0.924 | 5759                        | 5789                     | 0.717          |
|          |            | B08  |          |                       | 13326<br>5 |            |       | 5818                        |                          |                |
|          | Abeta 1-42 | B08  | 2        | N/A                   | 12761<br>2 | 12617<br>4 | 1.61  | 587                         | 581                      | 1.29           |
|          |            | B07  |          |                       | 12473<br>5 |            |       | 576                         |                          |                |
| U018     | Abeta 1-38 | C07  | 2        | N/A                   | 13073      | 13093      | 0.211 | 1514                        | 1515                     | 0.127          |
|          |            | C08  |          |                       | 13112      |            |       | 1516                        |                          |                |
|          | Abeta 1-40 | C07  | 2        | N/A                   | 59640      | 57591      | 5.03  | 3259                        | 3182                     | 3.42           |
|          |            | C08  |          |                       | 55541      |            |       | 3105                        |                          |                |
|          | Abeta 1-42 | C08  | 2        | N/A                   | 34292      | 34277      | 0.062 | 209                         | 209                      | 0.048          |
|          |            | C07  |          |                       | 34262      |            |       | 209                         |                          |                |
| U019     | Abeta 1-38 | D07  | 2        | N/A                   | 57788      | 59423      | 3.89  | 3734                        | 3798                     | 2.39           |
|          |            | D08  |          |                       | 61058      |            |       | 3863                        |                          |                |
|          | Abeta 1-40 | D07  | 2        | N/A                   | 18709<br>4 | 18749<br>0 | 0.299 | 7679                        | 7693                     | 0.259          |
|          |            | D08  |          |                       | 18788<br>6 |            |       | 7707                        |                          |                |
|          | Abeta 1-42 | D07  | 2        | N/A                   | 72007      | 72247      | 0.47  | 373                         | 374                      | 0.368          |

Plate: Plate\_\*25D1OA5680V\*

| Sample * | Assay      | Well | Dilution | Concentration (pg/ml) | Signal | Mean   | CV    | Calc. Concentration (pg/ml) | Calc. Conc. Mean (pg/ml) | Calc. Conc. CV |
|----------|------------|------|----------|-----------------------|--------|--------|-------|-----------------------------|--------------------------|----------------|
|          |            | D08  |          |                       | 72487  |        |       | 375                         |                          |                |
| U020     | Abeta 1-38 | E07  | 2        | N/A                   | 27959  | 28051  | 0.461 | 2398                        | 2403                     | 0.28           |
|          |            | E08  |          |                       | 28142  |        |       | 2408                        |                          |                |
|          | Abeta 1-40 | E07  | 2        | N/A                   | 118940 | 117318 | 1.96  | 5332                        | 5277                     | 1.48           |
|          |            | E08  |          |                       | 115695 |        |       | 5222                        |                          |                |
|          | Abeta 1-42 | E08  | 2        | N/A                   | 78536  | 78295  | 0.435 | 399                         | 398                      | 0.342          |
|          |            | E07  |          |                       | 78054  |        |       | 397                         |                          |                |
| U021     | Abeta 1-38 | F07  | 2        | N/A                   | 57568  | 56164  | 3.54  | 3725                        | 3669                     | 2.17           |
|          |            | F08  |          |                       | 54760  |        |       | 3613                        |                          |                |
|          | Abeta 1-40 | F08  | 2        | N/A                   | 175603 | 179595 | 3.14  | 7273                        | 7414                     | 2.68           |
|          |            | F07  |          |                       | 183586 |        |       | 7555                        |                          |                |
|          | Abeta 1-42 | F08  | 2        | N/A                   | 63590  | 64399  | 1.78  | 338                         | 342                      | 1.39           |
|          |            | F07  |          |                       | 65208  |        |       | 345                         |                          |                |
| U022     | Abeta 1-38 | G07  | 2        | N/A                   | 18035  | 18607  | 4.35  | 1839                        | 1874                     | 2.63           |
|          |            | G08  |          |                       | 19179  |        |       | 1909                        |                          |                |
|          | Abeta 1-40 | G07  | 2        | N/A                   | 77927  | 77190  | 1.35  | 3921                        | 3895                     | 0.949          |
|          |            | G08  |          |                       | 76452  |        |       | 3869                        |                          |                |
|          | Abeta 1-42 | G07  | 2        | N/A                   | 47530  | 47644  | 0.338 | 270                         | 270                      | 0.263          |
|          |            | G08  |          |                       | 47758  |        |       | 271                         |                          |                |
| U023     | Abeta 1-38 | H07  | 2        | N/A                   | 55148  | 54845  | 0.781 | 3628                        | 3616                     | 0.479          |
|          |            | H08  |          |                       | 54542  |        |       | 3604                        |                          |                |
|          | Abeta 1-40 | H07  | 2        | N/A                   | 183328 | 175987 | 5.9   | 7545                        | 7288                     | 5              |
|          |            | H08  |          |                       | 168645 |        |       | 7031                        |                          |                |

Plate: Plate\_\*25D1OA5680V\*

| Sample * | Assay      | Well | Dilution | Concentration (pg/ml) | Signal | Mean  | CV    | Calc. Concentration (pg/ml) | Calc. Conc. Mean (pg/ml) | Calc. Conc. CV |
|----------|------------|------|----------|-----------------------|--------|-------|-------|-----------------------------|--------------------------|----------------|
|          | Abeta 1-42 | H08  | 2        | N/A                   | 67157  | 67294 | 0.288 | 353                         | 354                      | 0.225          |
|          |            | H07  |          |                       | 67431  |       |       | 354                         |                          |                |
| U024     | Abeta 1-38 | A10  | 2        | N/A                   | 51713  | 50586 | 3.15  | 3488                        | 3441                     | 1.93           |
|          |            | A09  |          |                       | 49458  |       |       | 3394                        |                          |                |
|          | Abeta 1-40 | A09  | 2        | N/A                   | 15807  | 16111 | 2.67  | 6665                        | 6770                     | 2.19           |
|          |            | A10  |          |                       | 16415  |       |       | 6875                        |                          |                |
|          | Abeta 1-42 | A10  | 2        | N/A                   | 52962  | 53990 | 2.69  | 293                         | 298                      | 2.1            |
|          |            | A09  |          |                       | 55017  |       |       | 302                         |                          |                |
| U025     | Abeta 1-38 | B10  | 2        | N/A                   | 6996   | 6860  | 2.8   | 1037                        | 1025                     | 1.7            |
|          |            | B09  |          |                       | 6724   |       |       | 1012                        |                          |                |
|          | Abeta 1-40 | B10  | 2        | N/A                   | 32337  | 31494 | 3.79  | 2169                        | 2132                     | 2.47           |
|          |            | B09  |          |                       | 30650  |       |       | 2095                        |                          |                |
|          | Abeta 1-42 | B10  | 2        | N/A                   | 18029  | 17840 | 1.5   | 128                         | 127                      | 1.15           |
|          |            | B09  |          |                       | 17651  |       |       | 126                         |                          |                |
| U026     | Abeta 1-38 | C09  | 2        | N/A                   | 27436  | 27331 | 0.543 | 2371                        | 2365                     | 0.33           |
|          |            | C10  |          |                       | 27226  |       |       | 2360                        |                          |                |
|          | Abeta 1-40 | C10  | 2        | N/A                   | 10913  | 10939 | 0.339 | 4999                        | 5008                     | 0.252          |
|          |            | C09  |          |                       | 10965  |       |       | 5017                        |                          |                |
|          | Abeta 1-42 | C09  | 2        | N/A                   | 85274  | 84738 | 0.895 | 426                         | 424                      | 0.706          |
|          |            | C10  |          |                       | 84201  |       |       | 422                         |                          |                |
| U027     | Abeta 1-38 | D10  | 2        | N/A                   | 32440  | 33387 | 4.01  | 2625                        | 2671                     | 2.44           |
|          |            | D09  |          |                       | 34333  |       |       | 2717                        |                          |                |
|          | Abeta 1-40 | D10  | 2        | N/A                   | 13146  | 13113 | 0.356 | 5757                        | 5746                     | 0.276          |
|          |            |      |          |                       | 4      |       |       | 4                           |                          |                |



Plate: Plate\_\*25D1OA5680V\*

| Sample * | Assay      | Well | Dilution | Concentration (pg/ml) | Signal     | Mean       | CV    | Calc. Concentration (pg/ml) | Calc. Conc. Mean (pg/ml) | Calc. Conc. CV |
|----------|------------|------|----------|-----------------------|------------|------------|-------|-----------------------------|--------------------------|----------------|
|          |            | D09  |          |                       | 13080<br>4 |            |       | 5735                        |                          |                |
|          | Abeta 1-42 | D10  | 2        | N/A                   | 11547<br>3 | 11551<br>9 | 0.056 | 542                         | 542                      | 0.044          |
|          |            | D09  |          |                       | 11556<br>4 |            |       | 542                         |                          |                |
| U028     | Abeta 1-38 | E10  | 2        | N/A                   | 34731      | 34322      | 1.69  | 2736                        | 2716                     | 1.02           |
|          |            | E09  |          |                       | 33913      |            |       | 2697                        |                          |                |
|          | Abeta 1-40 | E10  | 2        | N/A                   | 12688<br>2 | 12380<br>4 | 3.52  | 5602                        | 5497                     | 2.68           |
|          |            | E09  |          |                       | 12072<br>6 |            |       | 5393                        |                          |                |
|          | Abeta 1-42 | E10  | 2        | N/A                   | 11281<br>6 | 11359<br>0 | 0.964 | 532                         | 534                      | 0.769          |
|          |            | E09  |          |                       | 11436<br>4 |            |       | 537                         |                          |                |
| U029     | Abeta 1-38 | F10  | 2        | N/A                   | 32057      | 30771      | 5.91  | 2606                        | 2541                     | 3.59           |
|          |            | F09  |          |                       | 29485      |            |       | 2477                        |                          |                |
|          | Abeta 1-40 | F10  | 2        | N/A                   | 12405<br>6 | 12015<br>2 | 4.6   | 5506                        | 5373                     | 3.49           |
|          |            | F09  |          |                       | 11624<br>7 |            |       | 5241                        |                          |                |
|          | Abeta 1-42 | F09  | 2        | N/A                   | 99024      | 10024<br>3 | 1.72  | 479                         | 484                      | 1.36           |
|          |            | F10  |          |                       | 10146<br>2 |            |       | 489                         |                          |                |
| U030     | Abeta 1-38 | G10  | 2        | N/A                   | 8337       | 8361       | 0.398 | 1153                        | 1155                     | 0.241          |
|          |            | G09  |          |                       | 8384       |            |       | 1157                        |                          |                |
|          | Abeta 1-40 | G10  | 2        | N/A                   | 37301      | 38436      | 4.17  | 2382                        | 2429                     | 2.75           |
|          |            | G09  |          |                       | 39570      |            |       | 2476                        |                          |                |

Plate: Plate\_\*25D1OA5680V\*

| Sample * | Assay      | Well | Dilution | Concentration (pg/ml) | Signal | Mean  | CV   | Calc. Concentration (pg/ml) | Calc. Conc. Mean (pg/ml) | Calc. Conc. CV |
|----------|------------|------|----------|-----------------------|--------|-------|------|-----------------------------|--------------------------|----------------|
|          | Abeta 1-42 | G09  | 2        | N/A                   | 8577   | 8167  | 7.11 | 72                          | 69.3                     | 5.48           |
|          |            | G10  |          |                       | 7756   |       |      | 66.7                        |                          |                |
| U031     | Abeta 1-38 | H09  | 2        | N/A                   | 25431  | 24974 | 2.59 | 2264                        | 2239                     | 1.57           |
|          |            | H10  |          |                       | 24517  |       |      | 2215                        |                          |                |
|          | Abeta 1-40 | H10  | 2        | N/A                   | 12136  | 11808 | 3.92 | 5415                        | 5303                     | 2.96           |
|          |            | H09  |          |                       | 11481  |       |      | 5192                        |                          |                |
|          | Abeta 1-42 | H10  | 2        | N/A                   | 11250  | 11351 | 1.26 | 530                         | 534                      | 1              |
|          |            | H09  |          |                       | 11452  |       |      | 538                         |                          |                |
| U032     | Abeta 1-38 | A11  | 2        | N/A                   | 51148  | 47996 | 9.29 | 3465                        | 3331                     | 5.69           |
|          |            | A12  |          |                       | 44844  |       |      | 3197                        |                          |                |
|          | Abeta 1-40 | A11  | 2        | N/A                   | 17262  | 16616 | 5.5  | 7169                        | 6945                     | 4.56           |
|          |            | A12  |          |                       | 15969  |       |      | 6721                        |                          |                |
|          | Abeta 1-42 | A11  | 2        | N/A                   | 45274  | 43325 | 6.36 | 260                         | 251                      | 4.93           |
|          |            | A12  |          |                       | 41375  |       |      | 242                         |                          |                |

**Data Grid Legend**

| Name                          | Abbreviation |
|-------------------------------|--------------|
| Assay                         | A:           |
| Assay Results                 | AR:          |
| Calculated Concentration      | CC:          |
| Calculated Concentration C.V. | CCCV:        |
| Calculated Concentration Mean | CCM:         |
| Calculated Concentration S.D. | CCSD:        |
| Concentrations                | C:           |
| Detection Range               | DR:          |
| Dilutions                     | D:           |
| % Recovery                    | %R:          |
| % Recovery Mean               | %RM:         |
| Sample                        | S:           |
| Sample Group                  | SG:          |
| Signal C.V.                   | CV:          |
| Signal Mean                   | M:           |
| Signal                        | R:           |
| Signal S.D.                   | SD:          |

## Data Grid - Abeta 1-40

|          | 1                                  | 2                                  | 3                     | 4                     | 5                     | 6                     | 7                     | 8                     | 9                     | 10                    | 11                               | 12                               |
|----------|------------------------------------|------------------------------------|-----------------------|-----------------------|-----------------------|-----------------------|-----------------------|-----------------------|-----------------------|-----------------------|----------------------------------|----------------------------------|
| <b>A</b> | R: 515865<br>C: 15316<br>CC: 15308 | R: 552998<br>C: 15316<br>CC: 19419 | R: 90084<br>CC: 4346  | R: 95822<br>CC: 4544  | R: 26544<br>CC: 1908  | R: 26856<br>CC: 1923  | R: 14316<br>CC: 1285  | R: 14472<br>CC: 1294  | R: 158075<br>CC: 6665 | R: 164156<br>CC: 6875 | R: 172621<br>CC: 7169            | R: 159699<br>CC: 6721            |
| <b>B</b> | R: 171164<br>C: 3829<br>CC: 3559   | R: 170124<br>C: 3829<br>CC: 3541   | R: 179026<br>CC: 7394 | R: 173205<br>CC: 7189 | R: 93976<br>CC: 4481  | R: 96280<br>CC: 4560  | R: 131535<br>CC: 5759 | R: 133265<br>CC: 5818 | R: 30650<br>CC: 2095  | R: 32337<br>CC: 2169  | R: 97681<br>CC: 4608             | R: 96829<br>CC: 4579             |
| <b>C</b> | R: 29380<br>C: 957<br>CC: 1019     | R: 27320<br>C: 957<br>CC: 972      | R: 163296<br>CC: 6845 | R: 154667<br>CC: 6548 | R: 96127<br>CC: 4555  | R: 92246<br>CC: 4421  | R: 59640<br>CC: 3259  | R: 55541<br>CC: 3105  | R: 109655<br>CC: 5017 | R: 109131<br>CC: 4999 | R: 170519<br>C: 3829<br>CC: 3548 | R: 152187<br>C: 3829<br>CC: 3231 |
| <b>D</b> | R: 3398<br>C: 239<br>CC: 258       | R: 3300<br>C: 239<br>CC: 254       | R: 131929<br>CC: 5773 | R: 115375<br>CC: 5211 | R: 186445<br>CC: 7656 | R: 177020<br>CC: 7323 | R: 187094<br>CC: 7679 | R: 187886<br>CC: 7707 | R: 130804<br>CC: 5735 | R: 131464<br>CC: 5757 | R: 29500<br>C: 957<br>CC: 1022   | R: 29077<br>C: 957<br>CC: 1012   |
| <b>E</b> | R: 365<br>C: 59.8<br>CC: 56.6      | R: 354<br>C: 59.8<br>CC: 55.2      | R: 83423<br>CC: 4114  | R: 83125<br>CC: 4104  | R: 187692<br>CC: 7700 | R: 176440<br>CC: 7303 | R: 118940<br>CC: 5332 | R: 115695<br>CC: 5222 | R: 120726<br>CC: 5393 | R: 126882<br>CC: 5602 | R: 3442<br>C: 239<br>CC: 260     | R: 3243<br>C: 239<br>CC: 251     |
| <b>F</b> | R: 98<br>C: 15<br>CC: 10.7         | R: 128<br>C: 15<br>CC: 19.1        | R: 121651<br>CC: 5424 | R: 137546<br>CC: 5963 | R: 44195<br>CC: 2664  | R: 46181<br>CC: 2743  | R: 183586<br>CC: 7555 | R: 175603<br>CC: 7273 | R: 116247<br>CC: 5241 | R: 124056<br>CC: 5506 | R: 421<br>C: 59.8<br>CC: 63.2    | R: 428<br>C: 59.8<br>CC: 64      |
| <b>G</b> | R: 81<br>C: 3.74<br>CC: 2.97       | R: 85<br>C: 3.74<br>CC: 5.41       | R: 61406<br>CC: 3324  | R: 60670<br>CC: 3297  | R: 183502<br>CC: 7552 | R: 174309<br>CC: 7228 | R: 77927<br>CC: 3921  | R: 76452<br>CC: 3869  | R: 39570<br>CC: 2476  | R: 37301<br>CC: 2382  | R: 164654<br>CC: 6892            | R: 157686<br>CC: 6652            |
| <b>H</b> | R: 63                              | R: 71                              | R: 123873<br>CC: 5500 | R: 122991<br>CC: 5470 | R: 21465<br>CC: 1664  | R: 23997<br>CC: 1788  | R: 183328<br>CC: 7545 | R: 168645<br>CC: 7031 | R: 114813<br>CC: 5192 | R: 121364<br>CC: 5415 | R: 81360<br>CC: 4042             | R: 73376<br>CC: 3759             |

## Data Grid - Abeta 1-38

|          | 1                                           | 2                                           | 3                          | 4                          | 5                          | 6                          | 7                          | 8                          | 9                          | 10                         | 11                                        | 12                                        |
|----------|---------------------------------------------|---------------------------------------------|----------------------------|----------------------------|----------------------------|----------------------------|----------------------------|----------------------------|----------------------------|----------------------------|-------------------------------------------|-------------------------------------------|
| <b>A</b> | R:<br>725678<br>C:<br>10763<br>CC:<br>10541 | R:<br>746906<br>C:<br>10763<br>CC:<br>10815 | R:<br>13878<br>CC:<br>1569 | R:<br>15134<br>CC:<br>1654 | R:<br>5800<br>CC:<br>925   | R:<br>5824<br>CC:<br>928   | R:<br>2835<br>CC:<br>598   | R:<br>2755<br>CC:<br>587   | R:<br>49458<br>CC:<br>3394 | R:<br>51713<br>CC:<br>3488 | R:<br>51148<br>CC:<br>3465                | R:<br>44844<br>CC:<br>3197                |
| <b>B</b> | R:<br>118898<br>C:<br>2691<br>CC:<br>2924   | R:<br>106351<br>C:<br>2691<br>CC:<br>2726   | R:<br>50266<br>CC:<br>3428 | R:<br>48567<br>CC:<br>3357 | R:<br>24461<br>CC:<br>2211 | R:<br>23634<br>CC:<br>2166 | R:<br>31883<br>CC:<br>2597 | R:<br>33806<br>CC:<br>2691 | R:<br>6724<br>CC:<br>1012  | R:<br>6996<br>CC:<br>1037  | R:<br>24194<br>CC:<br>2197                | R:<br>23803<br>CC:<br>2175                |
| <b>C</b> | R:<br>10727<br>C: 673<br>CC:<br>672         | R:<br>10035<br>C: 673<br>CC:<br>645         | R:<br>45799<br>CC:<br>3238 | R:<br>47875<br>CC:<br>3327 | R:<br>24897<br>CC:<br>2235 | R:<br>24618<br>CC:<br>2220 | R:<br>13073<br>CC:<br>1514 | R:<br>13112<br>CC:<br>1516 | R:<br>27436<br>CC:<br>2371 | R:<br>27226<br>CC:<br>2360 | R:<br>113039<br>C:<br>2691<br>CC:<br>2832 | R:<br>108448<br>C:<br>2691<br>CC:<br>2759 |
| <b>D</b> | R:<br>1091<br>C: 168<br>CC:<br>164          | R: 979<br>C: 168<br>CC:<br>153              | R:<br>35946<br>CC:<br>2794 | R:<br>33730<br>CC:<br>2688 | R:<br>52437<br>CC:<br>3518 | R:<br>51975<br>CC:<br>3499 | R:<br>57788<br>CC:<br>3734 | R:<br>61058<br>CC:<br>3863 | R:<br>34333<br>CC:<br>2717 | R:<br>32440<br>CC:<br>2625 | R:<br>10985<br>C: 673<br>CC:<br>681       | R:<br>10787<br>C: 673<br>CC:<br>674       |
| <b>E</b> | R: 214<br>C: 42<br>CC:<br>49.5              | R: 206<br>C: 42<br>CC:<br>47.8              | R:<br>19742<br>CC:<br>1942 | R:<br>19156<br>CC:<br>1907 | R:<br>57696<br>CC:<br>3730 | R:<br>56563<br>CC:<br>3685 | R:<br>27959<br>CC:<br>2398 | R:<br>28142<br>CC:<br>2408 | R:<br>33913<br>CC:<br>2697 | R:<br>34731<br>CC:<br>2736 | R:<br>1152<br>C: 168<br>CC:<br>170        | R:<br>1070<br>C: 168<br>CC:<br>162        |
| <b>F</b> | R: 84<br>C: 10.5<br>CC:<br>7.84             | R: 103<br>C: 10.5<br>CC:<br>18.1            | R:<br>32144<br>CC:<br>2610 | R:<br>33881<br>CC:<br>2695 | R:<br>9836<br>CC:<br>1274  | R:<br>10218<br>CC:<br>1304 | R:<br>57568<br>CC:<br>3725 | R:<br>54760<br>CC:<br>3613 | R:<br>29485<br>CC:<br>2477 | R:<br>32057<br>CC:<br>2606 | R: 219<br>C: 42<br>CC:<br>50.6            | R: 206<br>C: 42<br>CC:<br>47.8            |
| <b>G</b> | R: 69<br>C: 2.63<br>CC: 0                   | R: 76<br>C: 2.63<br>CC: 0                   | R:<br>14514<br>CC:<br>1612 | R:<br>14513<br>CC:<br>1612 | R:<br>53498<br>CC:<br>3562 | R:<br>52389<br>CC:<br>3516 | R:<br>18035<br>CC:<br>1839 | R:<br>19179<br>CC:<br>1909 | R:<br>8384<br>CC:<br>1157  | R:<br>8337<br>CC:<br>1153  | R:<br>43674<br>CC:<br>3146                | R:<br>37528<br>CC:<br>2868                |
| <b>H</b> | R: 61                                       | R: 67                                       | R:<br>30518<br>CC:<br>2529 | R:<br>30796<br>CC:<br>2543 | R:<br>4776<br>CC:<br>822   | R:<br>4917<br>CC:<br>837   | R:<br>55148<br>CC:<br>3628 | R:<br>54542<br>CC:<br>3604 | R:<br>25431<br>CC:<br>2264 | R:<br>24517<br>CC:<br>2215 | R:<br>13450<br>CC:<br>1540                | R:<br>11210<br>CC:<br>1379                |

## Data Grid - Abeta 1-42

|          | 1                                | 2                                | 3                    | 4                    | 5                    | 6                   | 7                    | 8                    | 9                    | 10                   | 11                              | 12                              |
|----------|----------------------------------|----------------------------------|----------------------|----------------------|----------------------|---------------------|----------------------|----------------------|----------------------|----------------------|---------------------------------|---------------------------------|
| <b>A</b> | R: 704403<br>C: 1379<br>CC: 1346 | R: 720796<br>C: 1379<br>CC: 1380 | R: 63389<br>CC: 337  | R: 64459<br>CC: 342  | R: 5566<br>CC: 51.6  | R: 5639<br>CC: 52.1 | R: 8960<br>CC: 74.5  | R: 9083<br>CC: 75.3  | R: 55017<br>CC: 302  | R: 52962<br>CC: 293  | R: 45274<br>CC: 260             | R: 41375<br>CC: 242             |
| <b>B</b> | R: 166611<br>C: 345<br>CC: 364   | R: 162243<br>C: 345<br>CC: 356   | R: 72740<br>CC: 376  | R: 71893<br>CC: 372  | R: 58816<br>CC: 318  | R: 58099<br>CC: 315 | R: 124735<br>CC: 576 | R: 127612<br>CC: 587 | R: 17651<br>CC: 126  | R: 18029<br>CC: 128  | R: 76783<br>CC: 392             | R: 80057<br>CC: 405             |
| <b>C</b> | R: 28445<br>C: 86.2<br>CC: 90.6  | R: 26467<br>C: 86.2<br>CC: 85.7  | R: 40876<br>CC: 240  | R: 40719<br>CC: 239  | R: 22035<br>CC: 149  | R: 22717<br>CC: 152 | R: 34262<br>CC: 209  | R: 34292<br>CC: 209  | R: 85274<br>CC: 426  | R: 84201<br>CC: 422  | R: 156931<br>C: 345<br>CC: 347  | R: 146481<br>C: 345<br>CC: 328  |
| <b>D</b> | R: 4023<br>C: 21.5<br>CC: 20     | R: 3905<br>C: 21.5<br>CC: 19.6   | R: 30420<br>CC: 191  | R: 29271<br>CC: 185  | R: 60689<br>CC: 326  | R: 57790<br>CC: 314 | R: 72007<br>CC: 373  | R: 72487<br>CC: 375  | R: 115564<br>CC: 542 | R: 115473<br>CC: 542 | R: 25509<br>C: 86.2<br>CC: 83.3 | R: 24915<br>C: 86.2<br>CC: 81.8 |
| <b>E</b> | R: 809<br>C: 5.39<br>CC: 5.49    | R: 787<br>C: 5.39<br>CC: 5.36    | R: 18740<br>CC: 131  | R: 19510<br>CC: 136  | R: 77627<br>CC: 395  | R: 75483<br>CC: 387 | R: 78054<br>CC: 397  | R: 78536<br>CC: 399  | R: 114364<br>CC: 537 | R: 112816<br>CC: 532 | R: 3875<br>C: 21.5<br>CC: 19.5  | R: 3719<br>C: 21.5<br>CC: 18.9  |
| <b>F</b> | R: 226<br>C: 1.35<br>CC: 1.52    | R: 247<br>C: 1.35<br>CC: 1.7     | R: 121076<br>CC: 562 | R: 126213<br>CC: 582 | R: 24092<br>CC: 159  | R: 24993<br>CC: 164 | R: 65208<br>CC: 345  | R: 63590<br>CC: 338  | R: 99024<br>CC: 479  | R: 101462<br>CC: 489 | R: 739<br>C: 5.39<br>CC: 5.07   | R: 728<br>C: 5.39<br>CC: 5.01   |
| <b>G</b> | R: 93<br>C: 0.337<br>CC: 0       | R: 121<br>C: 0.337<br>CC: 0.447  | R: 13349<br>CC: 101  | R: 13575<br>CC: 103  | R: 71470<br>CC: 371  | R: 70871<br>CC: 368 | R: 47530<br>CC: 270  | R: 47758<br>CC: 271  | R: 8577<br>CC: 72    | R: 7756<br>CC: 66.7  | R: 57344<br>CC: 312             | R: 52381<br>CC: 291             |
| <b>H</b> | R: 68                            | R: 75                            | R: 102627<br>CC: 493 | R: 105042<br>CC: 502 | R: 13027<br>CC: 99.4 | R: 13134<br>CC: 100 | R: 67431<br>CC: 354  | R: 67157<br>CC: 353  | R: 114520<br>CC: 538 | R: 112505<br>CC: 530 | R: 53400<br>CC: 295             | R: 45975<br>CC: 263             |

## Standard Data Table

Plate: Plate\_\*25D1OA5680V\*

Assay: Abeta 1-38

Group: Standard

| Sample * | Well | Concentration (pg/ml) | Signal | Mean   | CV   | Calc. Concentration (pg/ml) | Calc. Conc. Mean (pg/ml) | Calc. Conc. CV |
|----------|------|-----------------------|--------|--------|------|-----------------------------|--------------------------|----------------|
| S001     | A01  | 10763                 | 725678 | 736292 | 2.04 | 10541                       | 10678                    | 1.81           |
|          | A02  |                       | 746906 |        |      | 10815                       |                          |                |
| S002     | B02  | 2691                  | 106351 | 112625 | 7.88 | 2726                        | 2825                     | 4.96           |
|          | B01  |                       | 118898 |        |      | 2924                        |                          |                |
| S003     | C01  | 673                   | 10727  | 10381  | 4.71 | 672                         | 658                      | 2.85           |
|          | C02  |                       | 10035  |        |      | 645                         |                          |                |
| S004     | D02  | 168                   | 979    | 1035   | 7.65 | 153                         | 159                      | 4.95           |
|          | D01  |                       | 1091   |        |      | 164                         |                          |                |
| S005     | E02  | 42                    | 206    | 210    | 2.69 | 47.8                        | 48.6                     | 2.56           |
|          | E01  |                       | 214    |        |      | 49.5                        |                          |                |
| S006     | F02  | 10.5                  | 103    | 94     | 14.4 | 18.1                        | 13                       | 55.8           |
|          | F01  |                       | 84     |        |      | 7.84                        |                          |                |
| S007     | G01  | 2.63                  | 69     | 73     | 6.83 | 0                           | 0                        | N/A            |
|          | G02  |                       | 76     |        |      | 0                           |                          |                |

## Standard Analysis Properties

| Name                       | Value                                             |
|----------------------------|---------------------------------------------------|
| Algorithm Parameters       |                                                   |
| Initial Top                | 743655                                            |
| Initial Bottom             | 65.2                                              |
| Initial MidPoint           | 5999                                              |
| Initial HillSlope          | 1                                                 |
| Weighting                  | 1/y^2                                             |
| Max Iteration              | 500                                               |
| Fit Statistics             |                                                   |
| RSquared                   | 1                                                 |
| Calculated Parameters      |                                                   |
| Top                        | 2240833                                           |
| Bottom                     | 77.8                                              |
| MidPoint                   | 16367                                             |
| HillSlope                  | 1.67                                              |
| Detection Range Parameters |                                                   |
| Low                        | 18.4                                              |
| High                       | 10763                                             |
| Equation                   |                                                   |
| FourPL                     | $y = b_2 + \frac{b_1 - b_2}{1 + (x / b_3)^{b_4}}$ |



## Unknown Data Table

Plate: Plate\_\*25D1OA5680V\*

Assay: Abeta 1-38

Group: Unknown

| Sample #   | Well | Signal | Mean  | CV    | Calc. Concentration (pg/ml) | Calc. Conc. Mean (pg/ml) | Calc. Conc. CV |
|------------|------|--------|-------|-------|-----------------------------|--------------------------|----------------|
| Control 1  | A03  | 13878  | 14506 | 6.12  | 1569                        | 1612                     | 3.7            |
|            | A04  | 15134  |       |       | 1654                        |                          |                |
| Control 2  | H11  | 13450  | 12330 | 12.8  | 1540                        | 1460                     | 7.78           |
|            | H12  | 11210  |       |       | 1379                        |                          |                |
| NAD1 Alpha | G11  | 43674  | 40601 | 10.7  | 3146                        | 3007                     | 6.53           |
|            | G12  | 37528  |       |       | 2868                        |                          |                |
| NCT1 Alpha | B11  | 24194  | 23999 | 1.15  | 2197                        | 2186                     | 0.698          |
|            | B12  | 23803  |       |       | 2175                        |                          |                |
| U001       | B03  | 50266  | 49417 | 2.43  | 3428                        | 3392                     | 1.49           |
|            | B04  | 48567  |       |       | 3357                        |                          |                |
| U002       | C03  | 45799  | 46837 | 3.13  | 3238                        | 3283                     | 1.92           |
|            | C04  | 47875  |       |       | 3327                        |                          |                |
| U003       | D04  | 33730  | 34838 | 4.5   | 2688                        | 2741                     | 2.74           |
|            | D03  | 35946  |       |       | 2794                        |                          |                |
| U004       | E03  | 19742  | 19449 | 2.13  | 1942                        | 1925                     | 1.29           |
|            | E04  | 19156  |       |       | 1907                        |                          |                |
| U005       | F03  | 32144  | 33013 | 3.72  | 2610                        | 2653                     | 2.26           |
|            | F04  | 33881  |       |       | 2695                        |                          |                |
| U006       | G03  | 14514  | 14514 | 0.005 | 1612                        | 1612                     | 0.003          |
|            | G04  | 14513  |       |       | 1612                        |                          |                |
| U007       | H03  | 30518  | 30657 | 0.641 | 2529                        | 2536                     | 0.389          |
|            | H04  | 30796  |       |       | 2543                        |                          |                |
| U008       | A06  | 5824   | 5812  | 0.292 | 928                         | 927                      | 0.177          |
|            | A05  | 5800   |       |       | 925                         |                          |                |
| U009       | B06  | 23634  | 24048 | 2.43  | 2166                        | 2189                     | 1.47           |

Plate: Plate\_\*25D1OA5680V\*

Assay: Abeta 1-38

Group: Unknown

| Sample # | Well | Signal | Mean  | CV    | Calc. Concentration (pg/ml) | Calc. Conc. Mean (pg/ml) | Calc. Conc. CV |
|----------|------|--------|-------|-------|-----------------------------|--------------------------|----------------|
|          | B05  | 24461  |       |       | 2211                        |                          |                |
| U010     | C05  | 24897  | 24758 | 0.797 | 2235                        | 2228                     | 0.483          |
|          | C06  | 24618  |       |       | 2220                        |                          |                |
| U011     | D06  | 51975  | 52206 | 0.626 | 3499                        | 3509                     | 0.383          |
|          | D05  | 52437  |       |       | 3518                        |                          |                |
| U012     | E06  | 56563  | 57130 | 1.4   | 3685                        | 3708                     | 0.861          |
|          | E05  | 57696  |       |       | 3730                        |                          |                |
| U013     | F05  | 9836   | 10027 | 2.69  | 1274                        | 1289                     | 1.63           |
|          | F06  | 10218  |       |       | 1304                        |                          |                |
| U014     | G06  | 52389  | 52944 | 1.48  | 3516                        | 3539                     | 0.908          |
|          | G05  | 53498  |       |       | 3562                        |                          |                |
| U015     | H06  | 4917   | 4847  | 2.06  | 837                         | 830                      | 1.25           |
|          | H05  | 4776   |       |       | 822                         |                          |                |
| U016     | A08  | 2755   | 2795  | 2.02  | 587                         | 593                      | 1.25           |
|          | A07  | 2835   |       |       | 598                         |                          |                |
| U017     | B07  | 31883  | 32845 | 4.14  | 2597                        | 2644                     | 2.52           |
|          | B08  | 33806  |       |       | 2691                        |                          |                |
| U018     | C07  | 13073  | 13093 | 0.211 | 1514                        | 1515                     | 0.127          |
|          | C08  | 13112  |       |       | 1516                        |                          |                |
| U019     | D07  | 57788  | 59423 | 3.89  | 3734                        | 3798                     | 2.39           |
|          | D08  | 61058  |       |       | 3863                        |                          |                |
| U020     | E07  | 27959  | 28051 | 0.461 | 2398                        | 2403                     | 0.28           |
|          | E08  | 28142  |       |       | 2408                        |                          |                |
| U021     | F07  | 57568  | 56164 | 3.54  | 3725                        | 3669                     | 2.17           |
|          | F08  | 54760  |       |       | 3613                        |                          |                |
| U022     | G07  | 18035  | 18607 | 4.35  | 1839                        | 1874                     | 2.63           |
|          | G08  | 19179  |       |       | 1909                        |                          |                |

Plate: Plate\_\*25D1OA5680V\*

Assay: Abeta 1-38

Group: Unknown

| Sample # | Well | Signal | Mean  | CV    | Calc. Concentration (pg/ml) | Calc. Conc. Mean (pg/ml) | Calc. Conc. CV |
|----------|------|--------|-------|-------|-----------------------------|--------------------------|----------------|
| U023     | H07  | 55148  | 54845 | 0.781 | 3628                        | 3616                     | 0.479          |
|          | H08  | 54542  |       |       | 3604                        |                          |                |
| U024     | A10  | 51713  | 50586 | 3.15  | 3488                        | 3441                     | 1.93           |
|          | A09  | 49458  |       |       | 3394                        |                          |                |
| U025     | B10  | 6996   | 6860  | 2.8   | 1037                        | 1025                     | 1.7            |
|          | B09  | 6724   |       |       | 1012                        |                          |                |
| U026     | C09  | 27436  | 27331 | 0.543 | 2371                        | 2365                     | 0.33           |
|          | C10  | 27226  |       |       | 2360                        |                          |                |
| U027     | D10  | 32440  | 33387 | 4.01  | 2625                        | 2671                     | 2.44           |
|          | D09  | 34333  |       |       | 2717                        |                          |                |
| U028     | E10  | 34731  | 34322 | 1.69  | 2736                        | 2716                     | 1.02           |
|          | E09  | 33913  |       |       | 2697                        |                          |                |
| U029     | F10  | 32057  | 30771 | 5.91  | 2606                        | 2541                     | 3.59           |
|          | F09  | 29485  |       |       | 2477                        |                          |                |
| U030     | G10  | 8337   | 8361  | 0.398 | 1153                        | 1155                     | 0.241          |
|          | G09  | 8384   |       |       | 1157                        |                          |                |
| U031     | H09  | 25431  | 24974 | 2.59  | 2264                        | 2239                     | 1.57           |
|          | H10  | 24517  |       |       | 2215                        |                          |                |
| U032     | A11  | 51148  | 47996 | 9.29  | 3465                        | 3331                     | 5.69           |
|          | A12  | 44844  |       |       | 3197                        |                          |                |

**Blank Data Table**

Plate: Plate\_\*25D1OA5680V\*

Assay: Abeta 1-38

Group: Blank

| Sample * | Well | Signal | Mean | CV   |
|----------|------|--------|------|------|
| B001     | H02  | 67     | 64   | 6.63 |
|          | H01  | 61     |      |      |

**Control Data Table**

Plate: Plate\_\*25D1OA5680V\*

Assay: Abeta 1-38

Group: Control

| Sample # | Well | Concentration (pg/ml) | Signal | Mean   | CV   | % Recovery | % Recovery Mean | Calc. Concentration (pg/ml) | Calc. Conc. Mean (pg/ml) | Calc. Conc. CV |
|----------|------|-----------------------|--------|--------|------|------------|-----------------|-----------------------------|--------------------------|----------------|
| STD 2    | C12  | 2691                  | 108448 | 110744 | 2.93 | 103        | 104             | 2759                        | 2796                     | 1.84           |
|          | C11  |                       | 113039 |        |      | 105        |                 | 2832                        |                          |                |
| STD 3    | D12  | 673                   | 10787  | 10886  | 1.29 | 100        | 101             | 674                         | 678                      | 0.778          |
|          | D11  |                       | 10985  |        |      | 101        |                 | 681                         |                          |                |
| STD 4    | E11  | 168                   | 1152   | 1111   | 5.22 | 101        | 98.8            | 170                         | 166                      | 3.36           |
|          | E12  |                       | 1070   |        |      | 96.5       |                 | 162                         |                          |                |
| STD 5    | F12  | 42                    | 206    | 213    | 4.33 | 114        | 117             | 47.8                        | 49.2                     | 4.08           |
|          | F11  |                       | 219    |        |      | 120        |                 | 50.6                        |                          |                |

Plot: Standard 38

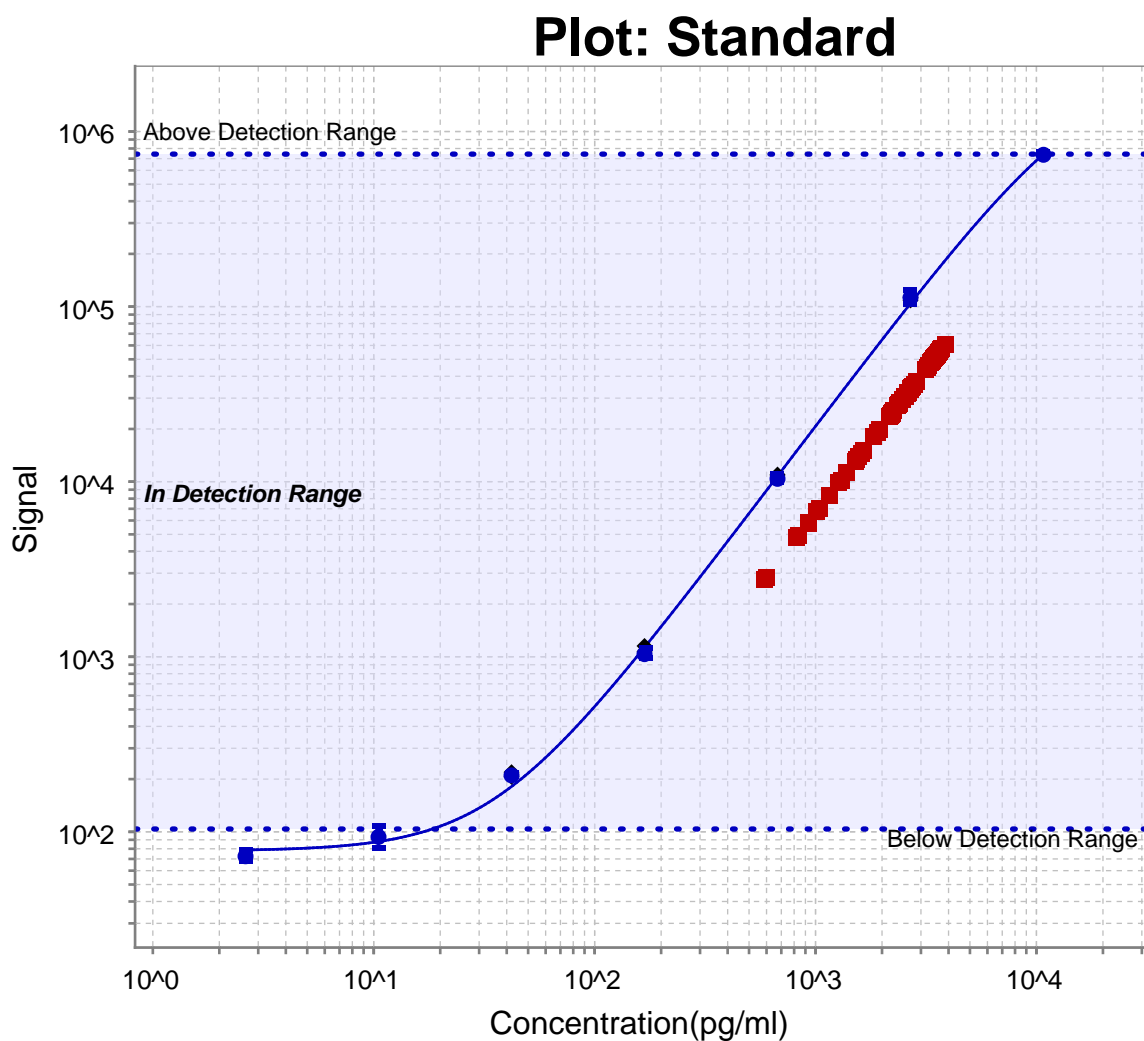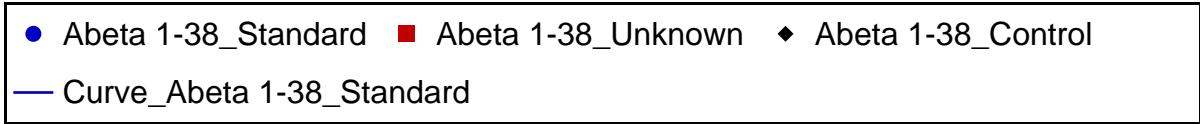

## Standard Data Table

Plate: Plate\_\*25D1OA5680V\*

Assay: Abeta 1-40

Group: Standard

| Sample * | Well | Concentration (pg/ml) | Signal | Mean   | CV    | Calc. Concentration (pg/ml) | Calc. Conc. Mean (pg/ml) | Calc. Conc. CV |
|----------|------|-----------------------|--------|--------|-------|-----------------------------|--------------------------|----------------|
| S001     | A02  | 15316                 | 552998 | 534432 | 4.91  | 19419                       | 17363                    | 16.7           |
|          | A01  |                       | 515865 |        |       | 15308                       |                          |                |
| S002     | B01  | 3829                  | 171164 | 170644 | 0.431 | 3559                        | 3550                     | 0.361          |
|          | B02  |                       | 170124 |        |       | 3541                        |                          |                |
| S003     | C02  | 957                   | 27320  | 28350  | 5.14  | 972                         | 995                      | 3.33           |
|          | C01  |                       | 29380  |        |       | 1019                        |                          |                |
| S004     | D02  | 239                   | 3300   | 3349   | 2.07  | 254                         | 256                      | 1.32           |
|          | D01  |                       | 3398   |        |       | 258                         |                          |                |
| S005     | E01  | 59.8                  | 365    | 360    | 2.16  | 56.6                        | 55.9                     | 1.71           |
|          | E02  |                       | 354    |        |       | 55.2                        |                          |                |
| S006     | F01  | 15                    | 98     | 113    | 18.8  | 10.7                        | 14.9                     | 39.7           |
|          | F02  |                       | 128    |        |       | 19.1                        |                          |                |
| S007     | G02  | 3.74                  | 85     | 83     | 3.41  | 5.41                        | 4.19                     | 41.2           |
|          | G01  |                       | 81     |        |       | 2.97                        |                          |                |

## Standard Analysis Properties

| Name                       | Value                                             |
|----------------------------|---------------------------------------------------|
| Algorithm Parameters       |                                                   |
| Initial Top                | 539776                                            |
| Initial Bottom             | 74.7                                              |
| Initial MidPoint           | 6880                                              |
| Initial HillSlope          | 1                                                 |
| Weighting                  | 1/y^2                                             |
| Max Iteration              | 500                                               |
| Fit Statistics             |                                                   |
| RSquared                   | 0.998                                             |
| Calculated Parameters      |                                                   |
| Top                        | 653266                                            |
| Bottom                     | 78.6                                              |
| MidPoint                   | 6755                                              |
| HillSlope                  | 1.62                                              |
| Detection Range Parameters |                                                   |
| Low                        | 13.6                                              |
| High                       | 15316                                             |
| Equation                   |                                                   |
| FourPL                     | $y = b_2 + \frac{b_1 - b_2}{1 + (x / b_3)^{b_4}}$ |



## Unknown Data Table

Plate: Plate\_\*25D1OA5680V\*

Assay: Abeta 1-40

Group: Unknown

| Sample #   | Well | Signal | Mean   | CV    | Calc. Concentration (pg/ml) | Calc. Conc. Mean (pg/ml) | Calc. Conc. CV |
|------------|------|--------|--------|-------|-----------------------------|--------------------------|----------------|
| Control 1  | A04  | 95822  | 92953  | 4.36  | 4544                        | 4445                     | 3.15           |
|            | A03  | 90084  |        |       | 4346                        |                          |                |
| Control 2  | H11  | 81360  | 77368  | 7.3   | 4042                        | 3900                     | 5.13           |
|            | H12  | 73376  |        |       | 3759                        |                          |                |
| NAD1 Alpha | G11  | 164654 | 161170 | 3.06  | 6892                        | 6772                     | 2.51           |
|            | G12  | 157686 |        |       | 6652                        |                          |                |
| NCT1 Alpha | B11  | 97681  | 97255  | 0.619 | 4608                        | 4593                     | 0.45           |
|            | B12  | 96829  |        |       | 4579                        |                          |                |
| U001       | B03  | 179026 | 176116 | 2.34  | 7394                        | 7292                     | 1.98           |
|            | B04  | 173205 |        |       | 7189                        |                          |                |
| U002       | C03  | 163296 | 158982 | 3.84  | 6845                        | 6696                     | 3.14           |
|            | C04  | 154667 |        |       | 6548                        |                          |                |
| U003       | D04  | 115375 | 123652 | 9.47  | 5211                        | 5492                     | 7.23           |
|            | D03  | 131929 |        |       | 5773                        |                          |                |
| U004       | E03  | 83423  | 83274  | 0.253 | 4114                        | 4109                     | 0.18           |
|            | E04  | 83125  |        |       | 4104                        |                          |                |
| U005       | F03  | 121651 | 129599 | 8.67  | 5424                        | 5694                     | 6.7            |
|            | F04  | 137546 |        |       | 5963                        |                          |                |
| U006       | G03  | 61406  | 61038  | 0.853 | 3324                        | 3311                     | 0.582          |
|            | G04  | 60670  |        |       | 3297                        |                          |                |
| U007       | H03  | 123873 | 123432 | 0.505 | 5500                        | 5485                     | 0.386          |
|            | H04  | 122991 |        |       | 5470                        |                          |                |
| U008       | A06  | 26856  | 26700  | 0.826 | 1923                        | 1915                     | 0.534          |
|            | A05  | 26544  |        |       | 1908                        |                          |                |
| U009       | B06  | 96280  | 95128  | 1.71  | 4560                        | 4520                     | 1.24           |

Plate: Plate\_\*25D1OA5680V\*

Assay: Abeta 1-40

Group: Unknown

| Sample # | Well | Signal | Mean   | CV    | Calc. Concentration (pg/ml) | Calc. Conc. Mean (pg/ml) | Calc. Conc. CV |
|----------|------|--------|--------|-------|-----------------------------|--------------------------|----------------|
|          | B05  | 93976  |        |       | 4481                        |                          |                |
| U010     | C05  | 96127  | 94187  | 2.91  | 4555                        | 4488                     | 2.11           |
|          | C06  | 92246  |        |       | 4421                        |                          |                |
| U011     | D05  | 186445 | 181733 | 3.67  | 7656                        | 7490                     | 3.14           |
|          | D06  | 177020 |        |       | 7323                        |                          |                |
| U012     | E06  | 176440 | 182066 | 4.37  | 7303                        | 7502                     | 3.75           |
|          | E05  | 187692 |        |       | 7700                        |                          |                |
| U013     | F06  | 46181  | 45188  | 3.11  | 2743                        | 2704                     | 2.07           |
|          | F05  | 44195  |        |       | 2664                        |                          |                |
| U014     | G06  | 174309 | 178906 | 3.63  | 7228                        | 7390                     | 3.1            |
|          | G05  | 183502 |        |       | 7552                        |                          |                |
| U015     | H06  | 23997  | 22731  | 7.88  | 1788                        | 1726                     | 5.07           |
|          | H05  | 21465  |        |       | 1664                        |                          |                |
| U016     | A08  | 14472  | 14394  | 0.766 | 1294                        | 1289                     | 0.487          |
|          | A07  | 14316  |        |       | 1285                        |                          |                |
| U017     | B07  | 131535 | 132400 | 0.924 | 5759                        | 5789                     | 0.717          |
|          | B08  | 133265 |        |       | 5818                        |                          |                |
| U018     | C07  | 59640  | 57591  | 5.03  | 3259                        | 3182                     | 3.42           |
|          | C08  | 55541  |        |       | 3105                        |                          |                |
| U019     | D07  | 187094 | 187490 | 0.299 | 7679                        | 7693                     | 0.259          |
|          | D08  | 187886 |        |       | 7707                        |                          |                |
| U020     | E07  | 118940 | 117318 | 1.96  | 5332                        | 5277                     | 1.48           |
|          | E08  | 115695 |        |       | 5222                        |                          |                |
| U021     | F08  | 175603 | 179595 | 3.14  | 7273                        | 7414                     | 2.68           |
|          | F07  | 183586 |        |       | 7555                        |                          |                |
| U022     | G07  | 77927  | 77190  | 1.35  | 3921                        | 3895                     | 0.949          |
|          | G08  | 76452  |        |       | 3869                        |                          |                |

Plate: Plate\_\*25D1OA5680V\*

Assay: Abeta 1-40

Group: Unknown

| Sample # | Well | Signal | Mean   | CV    | Calc. Concentration (pg/ml) | Calc. Conc. Mean (pg/ml) | Calc. Conc. CV |
|----------|------|--------|--------|-------|-----------------------------|--------------------------|----------------|
| U023     | H07  | 183328 | 175987 | 5.9   | 7545                        | 7288                     | 5              |
|          | H08  | 168645 |        |       | 7031                        |                          |                |
| U024     | A09  | 158075 | 161116 | 2.67  | 6665                        | 6770                     | 2.19           |
|          | A10  | 164156 |        |       | 6875                        |                          |                |
| U025     | B10  | 32337  | 31494  | 3.79  | 2169                        | 2132                     | 2.47           |
|          | B09  | 30650  |        |       | 2095                        |                          |                |
| U026     | C10  | 109131 | 109393 | 0.339 | 4999                        | 5008                     | 0.252          |
|          | C09  | 109655 |        |       | 5017                        |                          |                |
| U027     | D10  | 131464 | 131134 | 0.356 | 5757                        | 5746                     | 0.276          |
|          | D09  | 130804 |        |       | 5735                        |                          |                |
| U028     | E10  | 126882 | 123804 | 3.52  | 5602                        | 5497                     | 2.68           |
|          | E09  | 120726 |        |       | 5393                        |                          |                |
| U029     | F10  | 124056 | 120152 | 4.6   | 5506                        | 5373                     | 3.49           |
|          | F09  | 116247 |        |       | 5241                        |                          |                |
| U030     | G10  | 37301  | 38436  | 4.17  | 2382                        | 2429                     | 2.75           |
|          | G09  | 39570  |        |       | 2476                        |                          |                |
| U031     | H10  | 121364 | 118089 | 3.92  | 5415                        | 5303                     | 2.96           |
|          | H09  | 114813 |        |       | 5192                        |                          |                |
| U032     | A11  | 172621 | 166160 | 5.5   | 7169                        | 6945                     | 4.56           |
|          | A12  | 159699 |        |       | 6721                        |                          |                |

**Blank Data Table**

Plate: Plate\_\*25D1OA5680V\*

Assay: Abeta 1-40

Group: Blank

| Sample * | Well | Signal | Mean | CV   |
|----------|------|--------|------|------|
| B001     | H01  | 63     | 67   | 8.44 |
|          | H02  | 71     |      |      |

**Control Data Table**

Plate: Plate\_\*25D1OA5680V\*

Assay: Abeta 1-40

Group: Control

| Sample * | Well | Concentration (pg/ml) | Signal | Mean   | % Recovery | % Recovery Mean | CV   | Calc. Concentration (pg/ml) | Calc. Conc. Mean (pg/ml) | Calc. Conc. CV |
|----------|------|-----------------------|--------|--------|------------|-----------------|------|-----------------------------|--------------------------|----------------|
| STD 2    | C11  | 3829                  | 170519 | 161353 | 92.7       | 88.5            | 8.03 | 3548                        | 3390                     | 6.6            |
|          | C12  |                       | 152187 |        | 84.4       |                 |      | 3231                        |                          |                |
| STD 3    | D11  | 957                   | 29500  | 29289  | 107        | 106             | 1.02 | 1022                        | 1017                     | 0.663          |
|          | D12  |                       | 29077  |        | 106        |                 |      | 1012                        |                          |                |
| STD 4    | E12  | 239                   | 3243   | 3343   | 105        | 107             | 4.21 | 251                         | 256                      | 2.68           |
|          | E11  |                       | 3442   |        | 109        |                 |      | 260                         |                          |                |
| STD 5    | F11  | 59.8                  | 421    | 425    | 106        | 106             | 1.17 | 63.2                        | 63.6                     | 0.885          |
|          | F12  |                       | 428    |        | 107        |                 |      | 64                          |                          |                |



## Standard Data Table

Plate: Plate\_\*25D1OA5680V\*

Assay: Abeta 1-42

Group: Standard

| Sample * | Well | Concentration (pg/ml) | Signal | Mean   | CV   | Calc. Concentration (pg/ml) | Calc. Conc. Mean (pg/ml) | Calc. Conc. CV |
|----------|------|-----------------------|--------|--------|------|-----------------------------|--------------------------|----------------|
| S001     | A01  | 1379                  | 704403 | 712600 | 1.63 | 1346                        | 1363                     | 1.77           |
|          | A02  |                       | 720796 |        |      | 1380                        |                          |                |
| S002     | B02  | 345                   | 162243 | 164427 | 1.88 | 356                         | 360                      | 1.53           |
|          | B01  |                       | 166611 |        |      | 364                         |                          |                |
| S003     | C02  | 86.2                  | 26467  | 27456  | 5.09 | 85.7                        | 88.2                     | 3.93           |
|          | C01  |                       | 28445  |        |      | 90.6                        |                          |                |
| S004     | D02  | 21.5                  | 3905   | 3964   | 2.1  | 19.6                        | 19.8                     | 1.64           |
|          | D01  |                       | 4023   |        |      | 20                          |                          |                |
| S005     | E01  | 5.39                  | 809    | 798    | 1.95 | 5.49                        | 5.42                     | 1.68           |
|          | E02  |                       | 787    |        |      | 5.36                        |                          |                |
| S006     | F01  | 1.35                  | 226    | 237    | 6.28 | 1.52                        | 1.61                     | 7.96           |
|          | F02  |                       | 247    |        |      | 1.7                         |                          |                |
| S007     | G01  | 0.337                 | 93     | 107    | 18.5 | 0                           | 0.223                    | 141            |
|          | G02  |                       | 121    |        |      | 0.447                       |                          |                |

## Standard Analysis Properties

| Name                       | Value                                             |
|----------------------------|---------------------------------------------------|
| Algorithm Parameters       |                                                   |
| Initial Top                | 719725                                            |
| Initial Bottom             | 96.3                                              |
| Initial MidPoint           | 707                                               |
| Initial HillSlope          | 1                                                 |
| Weighting                  | 1/y^2                                             |
| Max Iteration              | 500                                               |
| Fit Statistics             |                                                   |
| RSquared                   | 1                                                 |
| Calculated Parameters      |                                                   |
| Top                        | 2371097                                           |
| Bottom                     | 94.7                                              |
| MidPoint                   | 2589                                              |
| HillSlope                  | 1.32                                              |
| Detection Range Parameters |                                                   |
| Low                        | 0.916                                             |
| High                       | 1379                                              |
| Equation                   |                                                   |
| FourPL                     | $y = b_2 + \frac{b_1 - b_2}{1 + (x / b_3)^{b_4}}$ |



## Unknown Data Table

Plate: Plate\_\*25D1OA5680V\*

Assay: Abeta 1-42

Group: Unknown

| Sample #   | Well | Signal | Mean   | CV    | Calc. Concentration (pg/ml) | Calc. Conc. Mean (pg/ml) | Calc. Conc. CV |
|------------|------|--------|--------|-------|-----------------------------|--------------------------|----------------|
| Control 1  | A04  | 64459  | 63924  | 1.18  | 342                         | 340                      | 0.925          |
|            | A03  | 63389  |        |       | 337                         |                          |                |
| Control 2  | H12  | 45975  | 49688  | 10.6  | 263                         | 279                      | 8.22           |
|            | H11  | 53400  |        |       | 295                         |                          |                |
| NAD1 Alpha | G12  | 52381  | 54863  | 6.4   | 291                         | 301                      | 4.98           |
|            | G11  | 57344  |        |       | 312                         |                          |                |
| NCT1 Alpha | B12  | 80057  | 78420  | 2.95  | 405                         | 399                      | 2.32           |
|            | B11  | 76783  |        |       | 392                         |                          |                |
| U001       | B03  | 72740  | 72317  | 0.828 | 376                         | 374                      | 0.65           |
|            | B04  | 71893  |        |       | 372                         |                          |                |
| U002       | C04  | 40719  | 40798  | 0.272 | 239                         | 239                      | 0.211          |
|            | C03  | 40876  |        |       | 240                         |                          |                |
| U003       | D03  | 30420  | 29846  | 2.72  | 191                         | 188                      | 2.1            |
|            | D04  | 29271  |        |       | 185                         |                          |                |
| U004       | E04  | 19510  | 19125  | 2.85  | 136                         | 134                      | 2.19           |
|            | E03  | 18740  |        |       | 131                         |                          |                |
| U005       | F04  | 126213 | 123645 | 2.94  | 582                         | 572                      | 2.36           |
|            | F03  | 121076 |        |       | 562                         |                          |                |
| U006       | G03  | 13349  | 13462  | 1.19  | 101                         | 102                      | 0.913          |
|            | G04  | 13575  |        |       | 103                         |                          |                |
| U007       | H04  | 105042 | 103835 | 1.64  | 502                         | 498                      | 1.31           |
|            | H03  | 102627 |        |       | 493                         |                          |                |
| U008       | A05  | 5566   | 5603   | 0.921 | 51.6                        | 51.8                     | 0.713          |
|            | A06  | 5639   |        |       | 52.1                        |                          |                |
| U009       | B05  | 58816  | 58458  | 0.867 | 318                         | 317                      | 0.676          |

Plate: Plate\_\*25D1OA5680V\*

Assay: Abeta 1-42

Group: Unknown

| Sample # | Well | Signal | Mean   | CV    | Calc. Concentration (pg/ml) | Calc. Conc. Mean (pg/ml) | Calc. Conc. CV |
|----------|------|--------|--------|-------|-----------------------------|--------------------------|----------------|
|          | B06  | 58099  |        |       | 315                         |                          |                |
| U010     | C06  | 22717  | 22376  | 2.16  | 152                         | 151                      | 1.66           |
|          | C05  | 22035  |        |       | 149                         |                          |                |
| U011     | D06  | 57790  | 59240  | 3.46  | 314                         | 320                      | 2.7            |
|          | D05  | 60689  |        |       | 326                         |                          |                |
| U012     | E06  | 75483  | 76555  | 1.98  | 387                         | 391                      | 1.56           |
|          | E05  | 77627  |        |       | 395                         |                          |                |
| U013     | F05  | 24092  | 24543  | 2.6   | 159                         | 162                      | 2              |
|          | F06  | 24993  |        |       | 164                         |                          |                |
| U014     | G06  | 70871  | 71171  | 0.595 | 368                         | 369                      | 0.467          |
|          | G05  | 71470  |        |       | 371                         |                          |                |
| U015     | H06  | 13134  | 13081  | 0.578 | 100                         | 99.7                     | 0.445          |
|          | H05  | 13027  |        |       | 99.4                        |                          |                |
| U016     | A07  | 8960   | 9022   | 0.964 | 74.5                        | 74.9                     | 0.743          |
|          | A08  | 9083   |        |       | 75.3                        |                          |                |
| U017     | B08  | 127612 | 126174 | 1.61  | 587                         | 581                      | 1.29           |
|          | B07  | 124735 |        |       | 576                         |                          |                |
| U018     | C08  | 34292  | 34277  | 0.062 | 209                         | 209                      | 0.048          |
|          | C07  | 34262  |        |       | 209                         |                          |                |
| U019     | D07  | 72007  | 72247  | 0.47  | 373                         | 374                      | 0.368          |
|          | D08  | 72487  |        |       | 375                         |                          |                |
| U020     | E08  | 78536  | 78295  | 0.435 | 399                         | 398                      | 0.342          |
|          | E07  | 78054  |        |       | 397                         |                          |                |
| U021     | F08  | 63590  | 64399  | 1.78  | 338                         | 342                      | 1.39           |
|          | F07  | 65208  |        |       | 345                         |                          |                |
| U022     | G07  | 47530  | 47644  | 0.338 | 270                         | 270                      | 0.263          |
|          | G08  | 47758  |        |       | 271                         |                          |                |

Plate: Plate\_\*25D1OA5680V\*

Assay: Abeta 1-42

Group: Unknown

| Sample # | Well | Signal | Mean   | CV    | Calc. Concentration (pg/ml) | Calc. Conc. Mean (pg/ml) | Calc. Conc. CV |
|----------|------|--------|--------|-------|-----------------------------|--------------------------|----------------|
| U023     | H08  | 67157  | 67294  | 0.288 | 353                         | 354                      | 0.225          |
|          | H07  | 67431  |        |       | 354                         |                          |                |
| U024     | A10  | 52962  | 53990  | 2.69  | 293                         | 298                      | 2.1            |
|          | A09  | 55017  |        |       | 302                         |                          |                |
| U025     | B10  | 18029  | 17840  | 1.5   | 128                         | 127                      | 1.15           |
|          | B09  | 17651  |        |       | 126                         |                          |                |
| U026     | C09  | 85274  | 84738  | 0.895 | 426                         | 424                      | 0.706          |
|          | C10  | 84201  |        |       | 422                         |                          |                |
| U027     | D10  | 115473 | 115519 | 0.056 | 542                         | 542                      | 0.044          |
|          | D09  | 115564 |        |       | 542                         |                          |                |
| U028     | E10  | 112816 | 113590 | 0.964 | 532                         | 534                      | 0.769          |
|          | E09  | 114364 |        |       | 537                         |                          |                |
| U029     | F09  | 99024  | 100243 | 1.72  | 479                         | 484                      | 1.36           |
|          | F10  | 101462 |        |       | 489                         |                          |                |
| U030     | G09  | 8577   | 8167   | 7.11  | 72                          | 69.3                     | 5.48           |
|          | G10  | 7756   |        |       | 66.7                        |                          |                |
| U031     | H10  | 112505 | 113513 | 1.26  | 530                         | 534                      | 1              |
|          | H09  | 114520 |        |       | 538                         |                          |                |
| U032     | A11  | 45274  | 43325  | 6.36  | 260                         | 251                      | 4.93           |
|          | A12  | 41375  |        |       | 242                         |                          |                |

**Blank Data Table**

Plate: Plate\_\*25D1OA5680V\*

Assay: Abeta 1-42

Group: Blank

| Sample * | Well | Signal | Mean | CV   |
|----------|------|--------|------|------|
| B001     | H01  | 68     | 72   | 6.92 |
|          | H02  | 75     |      |      |

## Control Data Table

Plate: Plate\_\*25D1OA5680V\*

Assay: Abeta 1-42

Group: Control

| Sample # | Well | Concentration (pg/ml) | Signal | Mean   | % Recovery | % Recovery Mean | CV   | Calc. Concentration (pg/ml) | Calc. Conc. Mean (pg/ml) | Calc. Conc. CV |
|----------|------|-----------------------|--------|--------|------------|-----------------|------|-----------------------------|--------------------------|----------------|
| STD 2    | C11  | 345                   | 156931 | 151706 | 101        | 97.8            | 4.87 | 347                         | 337                      | 3.95           |
|          | C12  |                       | 146481 |        | 95.1       |                 |      | 328                         |                          |                |
| STD 3    | D12  | 86.2                  | 24915  | 25212  | 94.9       | 95.8            | 1.67 | 81.8                        | 82.6                     | 1.28           |
|          | D11  |                       | 25509  |        | 96.7       |                 |      | 83.3                        |                          |                |
| STD 4    | E11  | 21.5                  | 3875   | 3797   | 90.4       | 88.9            | 2.91 | 19.5                        | 19.2                     | 2.27           |
|          | E12  |                       | 3719   |        | 87.5       |                 |      | 18.9                        |                          |                |
| STD 5    | F12  | 5.39                  | 728    | 734    | 93         | 93.6            | 1.06 | 5.01                        | 5.04                     | 0.925          |
|          | F11  |                       | 739    |        | 94.2       |                 |      | 5.07                        |                          |                |

Plot: Standard 42

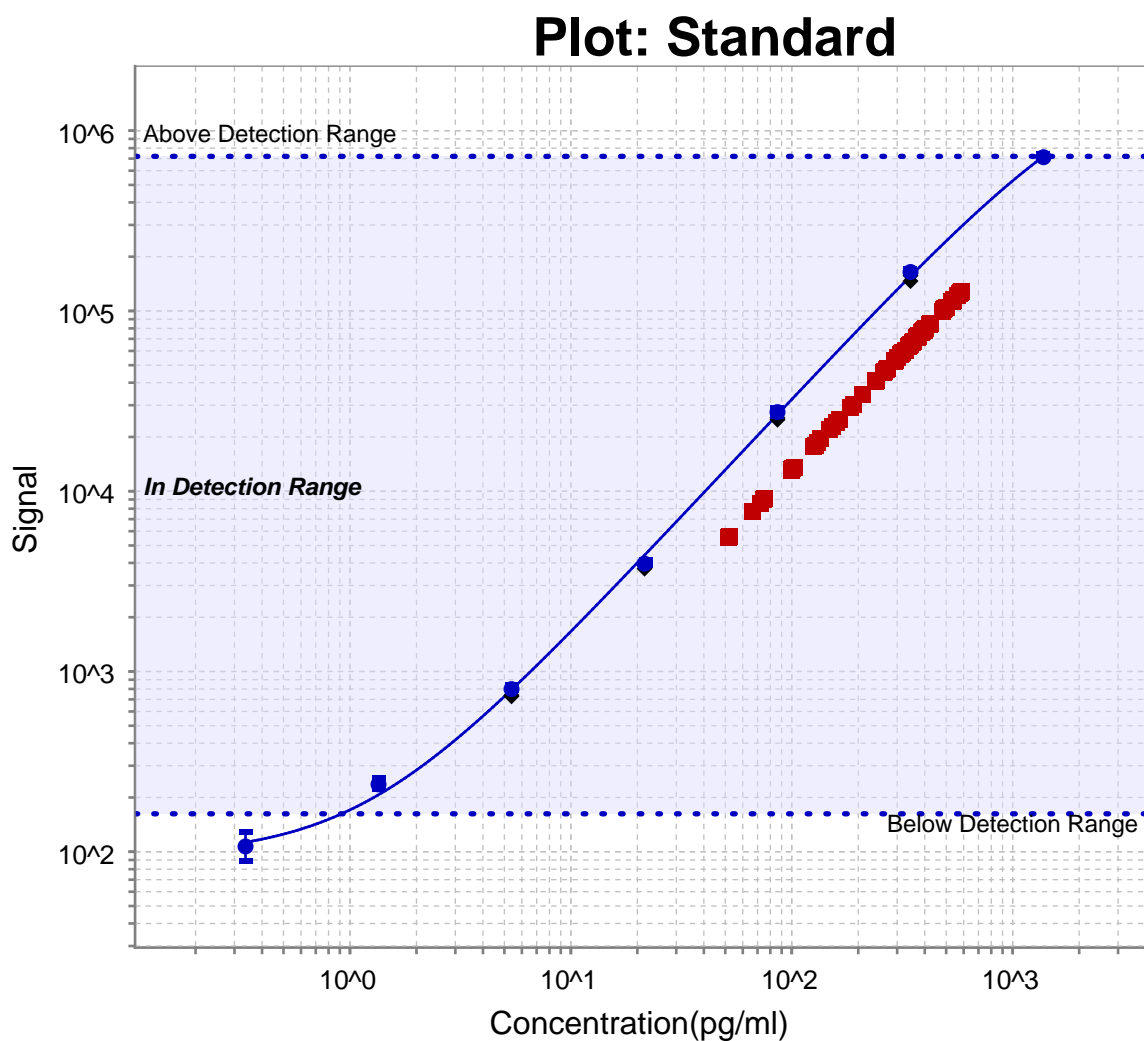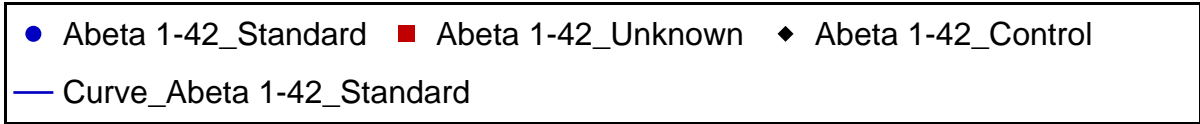

Supplement: alzrt236-S9.pdf [file alzrt236-S9.pdf]
