# Supplementary material for: Amyloid-beta 42 adsorption following serial tube transfer
Source: PubMed Central journal article supplement (PMC4059346; doi:10.1186/alzrt236), 2014-01-28

## **Report Properties**

Title: Experiment\_20131107172152

Author: Administrator

Creator: Administrator

Report Date: 07-Nov-2013

## **Notes**

**Plate Properties**

| Name           | Value                   |
|----------------|-------------------------|
| User           | Administrator           |
| Read Time      | 11/07/2013 14:35:57 GMT |
| Det Param      | Standard                |
| Type           | 96 Multi-Spot 4         |
| Wells Per Row  | 12                      |
| Wells Per Col  | 8                       |
| Spots Per Well | 4                       |
| Stack ID       | 0                       |
| Barcode1       | *25D10AU386G*           |
| Barcode2       | N/A                     |
| Barcode3       | N/A                     |
| Plate #        | 1287                    |
| Model          | IPR                     |
| Serial #       | 1200120302692           |
| Version        | MSD_3_0_18              |
| Orient         | 0                       |
| Comments       |                         |

**20131106\_WTBioM07.2\_AbTRIPLEX - Assay Assignment**

Spot : &lt;a1&gt; &lt;a2&gt;

Legend : &lt;b1&gt; &lt;b2&gt;

| Assay Assignment |            |
|------------------|------------|
| Spot ID          | Assay Name |
| 1                | Abeta 1-40 |
| 2                | Abeta 1-38 |
| 3                |            |
| 4                | Abeta 1-42 |

**20131106\_WTBioM07.2\_AbTRIPLEX - Group Association**

| Group Association |            |                |       |
|-------------------|------------|----------------|-------|
| Assay Name        | Group Name | Back Fit Curve | Blank |
| Abeta 1-38        | Unknown    | Standard       |       |

| Group Association |            |                |       |
|-------------------|------------|----------------|-------|
| Assay Name        | Group Name | Back Fit Curve | Blank |
| Abeta 1-40        | Unknown    | Standard       |       |
| Abeta 1-42        | Unknown    | Standard       |       |
| Abeta 1-38        | Standard   | -              |       |
| Abeta 1-40        | Standard   | -              |       |
| Abeta 1-42        | Standard   | -              |       |
| Abeta 1-38        | Control    | Standard       |       |
| Abeta 1-40        | Control    | Standard       |       |
| Abeta 1-42        | Control    | Standard       |       |

## 20131106\_WTBioM07.2\_AbTRIPLEX - Sample Definition

|          | 1             | 2             | 3                     | 4                     | 5                | 6                | 7                | 8                | 9                | 10               | 11                     | 12                     |
|----------|---------------|---------------|-----------------------|-----------------------|------------------|------------------|------------------|------------------|------------------|------------------|------------------------|------------------------|
| <b>A</b> | S001 Standard | S001 Standard | Control 1 Unkno<br>wn | Control 1 Unkno<br>wn | U008 Unkno<br>wn | U008 Unkno<br>wn | U016 Unkno<br>wn | U016 Unkno<br>wn | U024 Unkno<br>wn | U024 Unkno<br>wn | U032 Unkno<br>wn       | U032 Unkno<br>wn       |
| <b>B</b> | S002 Standard | S002 Standard | U001 Unkno<br>wn      | U001 Unkno<br>wn      | U009 Unkno<br>wn | U009 Unkno<br>wn | U017 Unkno<br>wn | U017 Unkno<br>wn | U025 Unkno<br>wn | U025 Unkno<br>wn | NCT1 Alpha Unkno<br>wn | NCT1 Alpha Unkno<br>wn |
| <b>C</b> | S003 Standard | S003 Standard | U002 Unkno<br>wn      | U002 Unkno<br>wn      | U010 Unkno<br>wn | U010 Unkno<br>wn | U018 Unkno<br>wn | U018 Unkno<br>wn | U026 Unkno<br>wn | U026 Unkno<br>wn | STD 2 Control          | STD 2 Control          |
| <b>D</b> | S004 Standard | S004 Standard | U003 Unkno<br>wn      | U003 Unkno<br>wn      | U011 Unkno<br>wn | U011 Unkno<br>wn | U019 Unkno<br>wn | U019 Unkno<br>wn | U027 Unkno<br>wn | U027 Unkno<br>wn | STD 3 Control          | STD 3 Control          |
| <b>E</b> | S005 Standard | S005 Standard | U004 Unkno<br>wn      | U004 Unkno<br>wn      | U012 Unkno<br>wn | U012 Unkno<br>wn | U020 Unkno<br>wn | U020 Unkno<br>wn | U028 Unkno<br>wn | U028 Unkno<br>wn | STD 4 Control          | STD 4 Control          |
| <b>F</b> | S006 Standard | S006 Standard | U005 Unkno<br>wn      | U005 Unkno<br>wn      | U013 Unkno<br>wn | U013 Unkno<br>wn | U021 Unkno<br>wn | U021 Unkno<br>wn | U029 Unkno<br>wn | U029 Unkno<br>wn | STD 5 Control          | STD 5 Control          |
| <b>G</b> | S007 Standard | S007 Standard | U006 Unkno<br>wn      | U006 Unkno<br>wn      | U014 Unkno<br>wn | U014 Unkno<br>wn | U022 Unkno<br>wn | U022 Unkno<br>wn | U030 Unkno<br>wn | U030 Unkno<br>wn | NAD1 Alpha Unkno<br>wn | NAD1 Alpha Unkno<br>wn |
| <b>H</b> | B001 Blank    | B001 Blank    | U007 Unkno<br>wn      | U007 Unkno<br>wn      | U015 Unkno<br>wn | U015 Unkno<br>wn | U023 Unkno<br>wn | U023 Unkno<br>wn | U031 Unkno<br>wn | U031 Unkno<br>wn | Control 2 Unkno<br>wn  | Control 2 Unkno<br>wn  |

**20131106\_WTBioM07.2\_AbTRIPLEX - Abeta 1-40's  
Concentration/Dilution Definition**

|   | 1     | 2     | 3 | 4 | 5 | 6 | 7 | 8 | 9 | 10 | 11   | 12   |
|---|-------|-------|---|---|---|---|---|---|---|----|------|------|
| A | 15316 | 15316 | 2 | 2 | 2 | 2 | 2 | 2 | 2 | 2  | 2    | 2    |
| B | 3829  | 3829  | 2 | 2 | 2 | 2 | 2 | 2 | 2 | 2  | 2    | 2    |
| C | 957   | 957   | 2 | 2 | 2 | 2 | 2 | 2 | 2 | 2  | 3829 | 3829 |
| D | 239   | 239   | 2 | 2 | 2 | 2 | 2 | 2 | 2 | 2  | 957  | 957  |
| E | 59.8  | 59.8  | 2 | 2 | 2 | 2 | 2 | 2 | 2 | 2  | 239  | 239  |
| F | 15    | 15    | 2 | 2 | 2 | 2 | 2 | 2 | 2 | 2  | 59.8 | 59.8 |
| G | 3.74  | 3.74  | 2 | 2 | 2 | 2 | 2 | 2 | 2 | 2  | 2    | 2    |
| H |       |       | 2 | 2 | 2 | 2 | 2 | 2 | 2 | 2  | 2    | 2    |

**20131106\_WTBioM07.2\_AbTRIPLEX - Abeta 1-38's  
Concentration/Dilution Definition**

|   | 1     | 2     | 3 | 4 | 5 | 6 | 7 | 8 | 9 | 10 | 11   | 12   |
|---|-------|-------|---|---|---|---|---|---|---|----|------|------|
| A | 10763 | 10763 | 2 | 2 | 2 | 2 | 2 | 2 | 2 | 2  | 2    | 2    |
| B | 2691  | 2691  | 2 | 2 | 2 | 2 | 2 | 2 | 2 | 2  | 2    | 2    |
| C | 673   | 673   | 2 | 2 | 2 | 2 | 2 | 2 | 2 | 2  | 2691 | 2691 |
| D | 168   | 168   | 2 | 2 | 2 | 2 | 2 | 2 | 2 | 2  | 673  | 673  |
| E | 42    | 42    | 2 | 2 | 2 | 2 | 2 | 2 | 2 | 2  | 168  | 168  |
| F | 10.5  | 10.5  | 2 | 2 | 2 | 2 | 2 | 2 | 2 | 2  | 42   | 42   |
| G | 2.63  | 2.63  | 2 | 2 | 2 | 2 | 2 | 2 | 2 | 2  | 2    | 2    |
| H |       |       | 2 | 2 | 2 | 2 | 2 | 2 | 2 | 2  | 2    | 2    |

**20131106\_WTBioM07.2\_AbTRIPLEX - Abeta 1-42's  
Concentration/Dilution Definition**

|   | 1     | 2     | 3 | 4 | 5 | 6 | 7 | 8 | 9 | 10 | 11   | 12   |
|---|-------|-------|---|---|---|---|---|---|---|----|------|------|
| A | 1379  | 1379  | 2 | 2 | 2 | 2 | 2 | 2 | 2 | 2  | 2    | 2    |
| B | 345   | 345   | 2 | 2 | 2 | 2 | 2 | 2 | 2 | 2  | 2    | 2    |
| C | 86.2  | 86.2  | 2 | 2 | 2 | 2 | 2 | 2 | 2 | 2  | 345  | 345  |
| D | 21.5  | 21.5  | 2 | 2 | 2 | 2 | 2 | 2 | 2 | 2  | 86.2 | 86.2 |
| E | 5.39  | 5.39  | 2 | 2 | 2 | 2 | 2 | 2 | 2 | 2  | 21.5 | 21.5 |
| F | 1.35  | 1.35  | 2 | 2 | 2 | 2 | 2 | 2 | 2 | 2  | 5.39 | 5.39 |
| G | 0.337 | 0.337 | 2 | 2 | 2 | 2 | 2 | 2 | 2 | 2  | 2    | 2    |
| H |       |       | 2 | 2 | 2 | 2 | 2 | 2 | 2 | 2  | 2    | 2    |

## Plate Data Table

Plate: Plate\_\*25D1OAU386G\*

| Sample *   | Assay      | Well | Dilution | Concentration (pg/ml) | Signal | Mean   | CV   | Calc. Concentration (pg/ml) | Calc. Conc. Mean (pg/ml) | Calc. Conc. CV |
|------------|------------|------|----------|-----------------------|--------|--------|------|-----------------------------|--------------------------|----------------|
| B001       | Abeta 1-38 | H02  | N/A      | N/A                   | 71     | 69     | 5.16 | N/A                         | N/A                      | N/A            |
|            |            | H01  |          |                       | 66     |        |      | N/A                         |                          |                |
|            | Abeta 1-40 | H01  | N/A      | N/A                   | 66     | 68     | 4.16 | N/A                         | N/A                      | N/A            |
|            |            | H02  |          |                       | 70     |        |      | N/A                         |                          |                |
|            | Abeta 1-42 | H01  | N/A      | N/A                   | 58     | 63     | 11.2 | N/A                         | N/A                      | N/A            |
|            |            | H02  |          |                       | 68     |        |      | N/A                         |                          |                |
| Control 1  | Abeta 1-38 | A03  | 2        | N/A                   | 14848  | 14467  | 3.72 | 1653                        | 1627                     | 2.2            |
|            |            | A04  |          |                       | 14086  |        |      | 1602                        |                          |                |
|            | Abeta 1-40 | A04  | 2        | N/A                   | 95617  | 97984  | 3.42 | 4428                        | 4506                     | 2.46           |
|            |            | A03  |          |                       | 100351 |        |      | 4584                        |                          |                |
|            | Abeta 1-42 | A04  | 2        | N/A                   | 64728  | 64355  | 0.82 | 359                         | 357                      | 0.619          |
|            |            | A03  |          |                       | 63982  |        |      | 355                         |                          |                |
| Control 2  | Abeta 1-38 | H11  | 2        | N/A                   | 13264  | 13017  | 2.69 | 1546                        | 1529                     | 1.59           |
|            |            | H12  |          |                       | 12769  |        |      | 1512                        |                          |                |
|            | Abeta 1-40 | H11  | 2        | N/A                   | 80386  | 77101  | 6.03 | 3916                        | 3803                     | 4.19           |
|            |            | H12  |          |                       | 73815  |        |      | 3691                        |                          |                |
|            | Abeta 1-42 | H12  | 2        | N/A                   | 46376  | 48692  | 6.73 | 279                         | 289                      | 5.04           |
|            |            | H11  |          |                       | 51008  |        |      | 300                         |                          |                |
| NAD1 Alpha | Abeta 1-38 | G11  | 2        | N/A                   | 40907  | 39638  | 4.53 | 3012                        | 2955                     | 2.7            |
|            |            | G12  |          |                       | 38368  |        |      | 2899                        |                          |                |
|            | Abeta 1-40 | G11  | 2        | N/A                   | 164389 | 159932 | 3.94 | 6672                        | 6526                     | 3.16           |
|            |            | G12  |          |                       | 155474 |        |      | 6380                        |                          |                |
|            | Abeta 1-42 | G12  | 2        | N/A                   | 50959  | 52182  | 3.31 | 299                         | 305                      | 2.49           |

Plate: Plate\_\*25D10AU386G\*

| Sample *   | Assay      | Well | Dilution | Concentration (pg/ml) | Signal | Mean  | CV    | Calc. Concentration (pg/ml) | Calc. Conc. Mean (pg/ml) | Calc. Conc. CV |
|------------|------------|------|----------|-----------------------|--------|-------|-------|-----------------------------|--------------------------|----------------|
|            |            | G11  |          |                       | 53404  |       |       | 310                         |                          |                |
| NCT1 Alpha | Abeta 1-38 | B11  | 2        | N/A                   | 17912  | 17225 | 5.64  | 1846                        | 1804                     | 3.33           |
|            |            | B12  |          |                       | 16537  |       |       | 1761                        |                          |                |
|            | Abeta 1-40 | B11  | 2        | N/A                   | 10361  | 10249 | 1.54  | 4692                        | 4655                     | 1.12           |
|            |            | B12  |          |                       | 10137  |       |       | 4618                        |                          |                |
|            | Abeta 1-42 | B12  | 2        | N/A                   | 67944  | 69244 | 2.66  | 372                         | 377                      | 2.01           |
|            |            | B11  |          |                       | 70544  |       |       | 383                         |                          |                |
| S001       | Abeta 1-38 | A01  | N/A      | 10763                 | 71461  | 73543 | 4     | 10406                       | 10696                    | 3.84           |
|            |            | A02  |          |                       | 75625  |       |       | 10986                       |                          |                |
|            | Abeta 1-40 | A02  | N/A      | 15316                 | 55046  | 56733 | 4.2   | 15521                       | 17195                    | 13.8           |
|            |            | A01  |          |                       | 58419  |       |       | 18869                       |                          |                |
|            | Abeta 1-42 | A01  | N/A      | 1379                  | 67156  | 66855 | 0.638 | 1376                        | 1369                     | 0.766          |
|            |            | A02  |          |                       | 66554  |       |       | 1362                        |                          |                |
| S002       | Abeta 1-38 | B02  | N/A      | 2691                  | 11064  | 11277 | 2.67  | 2751                        | 2784                     | 1.66           |
|            |            | B01  |          |                       | 11490  |       |       | 2816                        |                          |                |
|            | Abeta 1-40 | B01  | N/A      | 3829                  | 18070  | 17690 | 3.04  | 3605                        | 3542                     | 2.52           |
|            |            | B02  |          |                       | 17309  |       |       | 3479                        |                          |                |
|            | Abeta 1-42 | B02  | N/A      | 345                   | 15339  | 15419 | 0.736 | 349                         | 351                      | 0.588          |

Plate: Plate\_\*25D1OAU386G\*

| Sample * | Assay      | Well | Dilution | Concentration (pg/ml) | Signal | Mean  | CV    | Calc. Concentration (pg/ml) | Calc. Conc. Mean (pg/ml) | Calc. Conc. CV |
|----------|------------|------|----------|-----------------------|--------|-------|-------|-----------------------------|--------------------------|----------------|
|          |            | B01  |          |                       | 155001 |       |       | 352                         |                          |                |
| S003     | Abeta 1-38 | C01  | N/A      | 673                   | 10212  | 10234 | 0.304 | 663                         | 664                      | 0.179          |
|          |            | C02  |          |                       | 10256  |       |       | 664                         |                          |                |
|          | Abeta 1-40 | C02  | N/A      | 957                   | 31741  | 30431 | 6.09  | 1051                        | 1022                     | 3.95           |
|          |            | C01  |          |                       | 29121  |       |       | 994                         |                          |                |
|          | Abeta 1-42 | C02  | N/A      | 86.2                  | 26088  | 25692 | 2.18  | 91                          | 90                       | 1.61           |
|          |            | C01  |          |                       | 25296  |       |       | 89                          |                          |                |
| S004     | Abeta 1-38 | D02  | N/A      | 168                   | 960    | 970   | 1.39  | 159                         | 160                      | 0.878          |
|          |            | D01  |          |                       | 979    |       |       | 161                         |                          |                |
|          | Abeta 1-40 | D02  | N/A      | 239                   | 3203   | 3244  | 1.79  | 245                         | 247                      | 1.14           |
|          |            | D01  |          |                       | 3285   |       |       | 249                         |                          |                |
|          | Abeta 1-42 | D02  | N/A      | 21.5                  | 3327   | 3342  | 0.614 | 19.9                        | 20                       | 0.458          |
|          |            | D01  |          |                       | 3356   |       |       | 20                          |                          |                |
| S005     | Abeta 1-38 | E02  | N/A      | 42                    | 198    | 190   | 6.34  | 49.8                        | 47.7                     | 6.31           |
|          |            | E01  |          |                       | 181    |       |       | 45.6                        |                          |                |
|          | Abeta 1-40 | E01  | N/A      | 59.8                  | 354    | 367   | 4.82  | 54.9                        | 56.4                     | 3.74           |
|          |            | E02  |          |                       | 379    |       |       | 57.9                        |                          |                |
|          | Abeta 1-42 | E01  | N/A      | 5.39                  | 625    | 627   | 0.339 | 5.43                        | 5.44                     | 0.283          |
|          |            | E02  |          |                       | 628    |       |       | 5.45                        |                          |                |
| S006     | Abeta 1-38 | F02  | N/A      | 10.5                  | 92     | 90    | 3.14  | 14.1                        | 12.8                     | 14.3           |
|          |            | F01  |          |                       | 88     |       |       | 11.5                        |                          |                |
|          | Abeta 1-40 | F01  | N/A      | 15                    | 102    | 112   | 12.6  | 13.3                        | 15.9                     | 23.1           |
|          |            | F02  |          |                       | 122    |       |       | 18.5                        |                          |                |
|          | Abeta 1-42 | F01  | N/A      | 1.35                  | 168    | 181   | 10.2  | 1.42                        | 1.57                     | 13.6           |
|          |            | F02  |          |                       | 194    |       |       | 1.72                        |                          |                |
|          | Abeta 1-38 | G01  | N/A      | 2.63                  | 73     | 74    | 1.91  | 0                           | 0                        | N/A            |



Plate: Plate\_\*25D10AU386G\*

| Sample * | Assay      | Well  | Dilution | Concentration (pg/ml) | Signal | Mean   | CV   | Calc. Concentration (pg/ml) | Calc. Conc. Mean (pg/ml) | Calc. Conc. CV |
|----------|------------|-------|----------|-----------------------|--------|--------|------|-----------------------------|--------------------------|----------------|
| S007     |            | G02   |          |                       | 75     |        |      | 0                           |                          |                |
|          | Abeta 1-40 | G02   | N/A      | 3.74                  | 78     | 77     | 2.77 | 4.18                        | 3.11                     | 49             |
|          |            | G01   |          |                       | 75     |        |      | 2.03                        |                          |                |
|          | Abeta 1-42 | G01   | N/A      | 0.337                 | 90     | 90     | 0    | 0.237                       | 0.237                    | 0              |
|          |            | G02   |          |                       | 90     |        |      | 0.237                       |                          |                |
| STD 2    | Abeta 1-38 | C12   | N/A      | 2691                  | 90617  | 95136  | 6.72 | 2433                        | 2506                     | 4.12           |
|          |            | C11   |          |                       | 99655  |        |      | 2579                        |                          |                |
|          | Abeta 1-40 | C11   | N/A      | 3829                  | 174240 | 169750 | 3.74 | 3498                        | 3424                     | 3.06           |
|          |            | C12   |          |                       | 165260 |        |      | 3350                        |                          |                |
|          | Abeta 1-42 | C11   | N/A      | 345                   | 140254 | 135840 | 4.6  | 325                         | 317                      | 3.63           |
|          |            | C12   |          |                       | 131426 |        |      | 309                         |                          |                |
| STD 3    | Abeta 1-38 | D12   | N/A      | 673                   | 8873   | 9047   | 2.71 | 610                         | 617                      | 1.6            |
|          |            | D11   |          |                       | 9220   |        |      | 624                         |                          |                |
|          | Abeta 1-40 | D11   | N/A      | 957                   | 30128  | 28763  | 6.71 | 1016                        | 986                      | 4.34           |
|          |            | D12   |          |                       | 27398  |        |      | 956                         |                          |                |
|          | Abeta 1-42 | D12   | N/A      | 86.2                  | 19949  | 20986  | 6.99 | 74.7                        | 77.5                     | 5.16           |
| D11      |            | 22023 |          |                       | 80.3   |        |      |                             |                          |                |
| STD 4    | Abeta 1-38 | E11   | N/A      | 168                   | 966    | 947    | 2.84 | 160                         | 158                      | 1.8            |
|          |            | E12   |          |                       | 928    |        |      | 156                         |                          |                |
|          | Abeta 1-40 | E12   | N/A      | 239                   | 3136   | 3278   | 6.11 | 242                         | 248                      | 3.88           |
|          |            | E11   |          |                       | 3419   |        |      | 255                         |                          |                |
|          | Abeta 1-42 | E11   | N/A      | 21.5                  | 3010   | 2985   | 1.21 | 18.5                        | 18.3                     | 0.903          |
|          |            | E12   |          |                       | 2959   |        |      | 18.2                        |                          |                |
|          | Abeta 1-38 | F12   | N/A      | 42                    | 171    | 175    | 3.23 | 42.9                        | 44                       | 3.41           |

Plate: Plate\_\*25D10AU386G\*

| Sample * | Assay      | Well  | Dilution | Concentration (pg/ml) | Signal     | Mean       | CV    | Calc. Concentration (pg/ml) | Calc. Conc. Mean (pg/ml) | Calc. Conc. CV |
|----------|------------|-------|----------|-----------------------|------------|------------|-------|-----------------------------|--------------------------|----------------|
| STD 5    |            | F11   |          |                       | 179        |            |       | 45.1                        |                          |                |
|          | Abeta 1-40 | F11   | N/A      | 59.8                  | 366        | 363        | 1.37  | 56.4                        | 56                       | 1.06           |
|          |            | F12   |          |                       | 359        |            |       | 55.5                        |                          |                |
|          | Abeta 1-42 | F12   | N/A      | 5.39                  | 531        | 548        | 4.39  | 4.73                        | 4.85                     | 3.75           |
|          |            | F11   |          |                       | 565        |            |       | 4.98                        |                          |                |
| U001     | Abeta 1-38 | B03   | 2        | N/A                   | 30958      | 30635      | 1.49  | 2552                        | 2536                     | 0.885          |
|          |            | B04   |          |                       | 30312      |            |       | 2520                        |                          |                |
|          | Abeta 1-40 | B03   | 2        | N/A                   | 13921<br>6 | 13615<br>6 | 3.18  | 5851                        | 5752                     | 2.44           |
|          |            | B04   |          |                       | 13309<br>5 |            |       | 5653                        |                          |                |
|          | Abeta 1-42 | B03   | 2        | N/A                   | 11412<br>3 | 11472<br>6 | 0.743 | 554                         | 556                      | 0.579          |
|          |            | B04   |          |                       | 11532<br>8 |            |       | 558                         |                          |                |
| U002     | Abeta 1-38 | C03   | 2        | N/A                   | 4889       | 4776       | 3.35  | 858                         | 846                      | 1.99           |
|          |            | C04   |          |                       | 4663       |            |       | 834                         |                          |                |
|          | Abeta 1-40 | C03   | 2        | N/A                   | 25631      | 26013      | 2.07  | 1831                        | 1848                     | 1.34           |
|          |            | C04   |          |                       | 26394      |            |       | 1866                        |                          |                |
|          | Abeta 1-42 | C04   | 2        | N/A                   | 12336      | 12349      | 0.143 | 105                         | 105                      | 0.105          |
| C03      |            | 12361 |          |                       | 105        |            |       |                             |                          |                |
| U003     | Abeta 1-38 | D04   | 2        | N/A                   | 28099      | 27708      | 2     | 2409                        | 2389                     | 1.18           |
|          |            | D03   |          |                       | 27317      |            |       | 2369                        |                          |                |
|          | Abeta 1-40 | D04   | 2        | N/A                   | 12694<br>6 | 12325<br>7 | 4.23  | 5453                        | 5333                     | 3.18           |
|          |            | D03   |          |                       | 11956<br>7 |            |       | 5213                        |                          |                |
|          | Abeta 1-42 | D03   | 2        | N/A                   | 90774      | 92057      | 1.97  | 464                         | 469                      | 1.51           |
|          |            | D04   |          |                       | 93339      |            |       | 474                         |                          |                |

Plate: Plate\_\*25D1OAU386G\*

| Sample * | Assay      | Well | Dilution | Concentration (pg/ml) | Signal | Mean   | CV    | Calc. Concentration (pg/ml) | Calc. Conc. Mean (pg/ml) | Calc. Conc. CV |
|----------|------------|------|----------|-----------------------|--------|--------|-------|-----------------------------|--------------------------|----------------|
| U004     | Abeta 1-38 | E03  | 2        | N/A                   | 29568  | 30567  | 4.62  | 2483                        | 2532                     | 2.74           |
|          |            | E04  |          |                       | 31566  |        |       | 2581                        |                          |                |
|          | Abeta 1-40 | E03  | 2        | N/A                   | 133645 | 135106 | 1.53  | 5671                        | 5718                     | 1.17           |
|          |            | E04  |          |                       | 136567 |        |       | 5765                        |                          |                |
|          | Abeta 1-42 | E04  | 2        | N/A                   | 105027 | 102718 | 3.18  | 519                         | 510                      | 2.46           |
|          |            | E03  |          |                       | 100409 |        |       | 501                         |                          |                |
| U005     | Abeta 1-38 | F03  | 2        | N/A                   | 35316  | 39051  | 13.5  | 2760                        | 2927                     | 8.07           |
|          |            | F04  |          |                       | 42786  |        |       | 3094                        |                          |                |
|          | Abeta 1-40 | F03  | 2        | N/A                   | 126807 | 148180 | 20.4  | 5449                        | 6145                     | 16             |
|          |            | F04  |          |                       | 169552 |        |       | 6842                        |                          |                |
|          | Abeta 1-42 | F04  | 2        | N/A                   | 56680  | 52742  | 10.6  | 324                         | 307                      | 7.93           |
|          |            | F03  |          |                       | 48804  |        |       | 290                         |                          |                |
| U006     | Abeta 1-38 | G03  | 2        | N/A                   | 11062  | 11068  | 0.07  | 1389                        | 1390                     | 0.041          |
|          |            | G04  |          |                       | 11073  |        |       | 1390                        |                          |                |
|          | Abeta 1-40 | G03  | 2        | N/A                   | 55810  | 55798  | 0.032 | 3050                        | 3050                     | 0.021          |
|          |            | G04  |          |                       | 55785  |        |       | 3049                        |                          |                |
|          | Abeta 1-42 | G03  | 2        | N/A                   | 9641   | 9618   | 0.346 | 87.4                        | 87.3                     | 0.254          |
|          |            | G04  |          |                       | 9594   |        |       | 87.1                        |                          |                |
| U007     | Abeta 1-38 | H03  | 2        | N/A                   | 8711   | 8949   | 3.76  | 1207                        | 1226                     | 2.22           |
|          |            | H04  |          |                       | 9187   |        |       | 1245                        |                          |                |
|          | Abeta 1-40 | H03  | 2        | N/A                   | 43051  | 43772  | 2.33  | 2566                        | 2594                     | 1.54           |
|          |            | H04  |          |                       | 44492  |        |       | 2622                        |                          |                |
|          | Abeta 1-42 | H04  | 2        | N/A                   | 7899   | 7823   | 1.38  | 75.5                        | 74.9                     | 1.02           |

Plate: Plate\_\*25D10AU386G\*

| Sample * | Assay      | Well | Dilution | Concentration (pg/ml) | Signal | Mean   | CV    | Calc. Concentration (pg/ml) | Calc. Conc. Mean (pg/ml) | Calc. Conc. CV |
|----------|------------|------|----------|-----------------------|--------|--------|-------|-----------------------------|--------------------------|----------------|
|          |            | H03  |          |                       | 7746   |        |       | 74.4                        |                          |                |
| U008     | Abeta 1-38 | A06  | 2        | N/A                   | 30298  | 30027  | 1.28  | 2519                        | 2506                     | 0.757          |
|          |            | A05  |          |                       | 29756  |        |       | 2493                        |                          |                |
|          | Abeta 1-40 | A06  | 2        | N/A                   | 138918 | 134079 | 5.1   | 5842                        | 5685                     | 3.91           |
|          |            | A05  |          |                       | 129239 |        |       | 5528                        |                          |                |
|          | Abeta 1-42 | A05  | 2        | N/A                   | 123339 | 122809 | 0.61  | 588                         | 586                      | 0.478          |
|          |            | A06  |          |                       | 122279 |        |       | 584                         |                          |                |
| U009     | Abeta 1-38 | B06  | 2        | N/A                   | 16734  | 16759  | 0.211 | 1774                        | 1775                     | 0.124          |
|          |            | B05  |          |                       | 16784  |        |       | 1777                        |                          |                |
|          | Abeta 1-40 | B06  | 2        | N/A                   | 76531  | 76823  | 0.537 | 3784                        | 3794                     | 0.373          |
|          |            | B05  |          |                       | 77114  |        |       | 3804                        |                          |                |
|          | Abeta 1-42 | B05  | 2        | N/A                   | 14991  | 14956  | 0.336 | 121                         | 121                      | 0.247          |
|          |            | B06  |          |                       | 14920  |        |       | 121                         |                          |                |
| U010     | Abeta 1-38 | C05  | 2        | N/A                   | 49228  | 50766  | 4.28  | 3364                        | 3426                     | 2.57           |
|          |            | C06  |          |                       | 52303  |        |       | 3489                        |                          |                |
|          | Abeta 1-40 | C05  | 2        | N/A                   | 182440 | 185317 | 2.2   | 7269                        | 7365                     | 1.85           |
|          |            | C06  |          |                       | 188194 |        |       | 7461                        |                          |                |
|          | Abeta 1-42 | C06  | 2        | N/A                   | 70748  | 68916  | 3.76  | 383                         | 376                      | 2.85           |
|          |            | C05  |          |                       | 67084  |        |       | 368                         |                          |                |
| U011     | Abeta 1-38 | D06  | 2        | N/A                   | 52702  | 52215  | 1.32  | 3504                        | 3485                     | 0.792          |
|          |            | D05  |          |                       | 51727  |        |       | 3465                        |                          |                |
|          | Abeta 1-40 | D05  | 2        | N/A                   | 191327 | 195948 | 3.34  | 7566                        | 7723                     | 2.87           |
|          |            |      |          |                       |        |        |       |                             |                          |                |

Plate: Plate\_\*25D1OAU386G\*

| Sample * | Assay      | Well | Dilution | Concentration (pg/ml) | Signal | Mean   | CV    | Calc. Concentration (pg/ml) | Calc. Conc. Mean (pg/ml) | Calc. Conc. CV |
|----------|------------|------|----------|-----------------------|--------|--------|-------|-----------------------------|--------------------------|----------------|
|          |            | D06  |          |                       | 200569 |        |       | 7879                        |                          |                |
|          | Abeta 1-42 | D06  | 2        | N/A                   | 71529  | 70427  | 2.21  | 387                         | 382                      | 1.68           |
|          |            | D05  |          |                       | 69325  |        |       | 378                         |                          |                |
| U012     | Abeta 1-38 | E06  | 2        | N/A                   | 51862  | 52255  | 1.06  | 3471                        | 3487                     | 0.638          |
|          |            | E05  |          |                       | 52648  |        |       | 3502                        |                          |                |
|          | Abeta 1-40 | E06  | 2        | N/A                   | 181657 | 183948 | 1.76  | 7243                        | 7319                     | 1.48           |
|          |            | E05  |          |                       | 186238 |        |       | 7395                        |                          |                |
|          | Abeta 1-42 | E06  | 2        | N/A                   | 68227  | 69038  | 1.66  | 373                         | 376                      | 1.26           |
|          |            | E05  |          |                       | 69848  |        |       | 380                         |                          |                |
| U013     | Abeta 1-38 | F05  | 2        | N/A                   | 43382  | 43123  | 0.849 | 3119                        | 3108                     | 0.507          |
|          |            | F06  |          |                       | 42864  |        |       | 3097                        |                          |                |
|          | Abeta 1-40 | F06  | 2        | N/A                   | 164918 | 164345 | 0.494 | 6689                        | 6670                     | 0.399          |
|          |            | F05  |          |                       | 163771 |        |       | 6652                        |                          |                |
|          | Abeta 1-42 | F05  | 2        | N/A                   | 39270  | 38682  | 2.15  | 247                         | 244                      | 1.6            |
|          |            | F06  |          |                       | 38093  |        |       | 241                         |                          |                |
| U014     | Abeta 1-38 | G06  | 2        | N/A                   | 44045  | 45682  | 5.07  | 3148                        | 3217                     | 3.03           |
|          |            | G05  |          |                       | 47319  |        |       | 3285                        |                          |                |
|          | Abeta 1-40 | G06  | 2        | N/A                   | 170152 | 171023 | 0.72  | 6861                        | 6890                     | 0.589          |
|          |            | G05  |          |                       | 171893 |        |       | 6919                        |                          |                |
|          | Abeta 1-42 | G06  | 2        | N/A                   | 48247  | 48646  | 1.16  | 287                         | 289                      | 0.868          |
|          |            | G05  |          |                       | 49045  |        |       | 291                         |                          |                |
|          | Abeta 1-38 | H06  | 2        | N/A                   | 31799  | 33312  | 6.42  | 2593                        | 2665                     | 3.82           |

Plate: Plate\_\*25D10AU386G\*

| Sample *   | Assay      | Well       | Dilution | Concentration (pg/ml) | Signal     | Mean       | CV    | Calc. Concentration (pg/ml) | Calc. Conc. Mean (pg/ml) | Calc. Conc. CV |
|------------|------------|------------|----------|-----------------------|------------|------------|-------|-----------------------------|--------------------------|----------------|
| U015       |            | H05        |          |                       | 34824      |            |       | 2737                        |                          |                |
|            | Abeta 1-40 | H06        | 2        | N/A                   | 11788<br>3 | 12402<br>7 | 7.01  | 5159                        | 5358                     | 5.27           |
|            |            | H05        |          |                       | 13017<br>1 |            |       | 5558                        |                          |                |
|            | Abeta 1-42 | H06        | 2        | N/A                   | 24078      | 24622      | 3.12  | 172                         | 174                      | 2.31           |
|            |            | H05        |          |                       | 25165      |            |       | 177                         |                          |                |
|            | U016       | Abeta 1-38 | A08      | 2                     | N/A        | 34083      | 33855 | 0.955                       | 2702                     | 2691           |
| A07        |            |            | 33626    |                       |            | 2680       |       |                             |                          |                |
| Abeta 1-40 |            | A08        | 2        | N/A                   | 14128<br>1 | 13598<br>9 | 5.5   | 5918                        | 5747                     | 4.23           |
|            |            | A07        |          |                       | 13069<br>7 |            |       | 5575                        |                          |                |
| Abeta 1-42 |            | A07        | 2        | N/A                   | 27597      | 28178      | 2.92  | 190                         | 193                      | 2.16           |
|            |            | A08        |          |                       | 28759      |            |       | 196                         |                          |                |
| U017       | Abeta 1-38 | B07        | 2        | N/A                   | 28715      | 28617      | 0.484 | 2441                        | 2436                     | 0.287          |
|            |            | B08        |          |                       | 28519      |            |       | 2431                        |                          |                |
|            | Abeta 1-40 | B07        | 2        | N/A                   | 13123<br>8 | 13256<br>5 | 1.42  | 5592                        | 5635                     | 1.08           |
|            |            | B08        |          |                       | 13389<br>1 |            |       | 5678                        |                          |                |
|            | Abeta 1-42 | B08        | 2        | N/A                   | 11635<br>4 | 11599<br>2 | 0.442 | 562                         | 561                      | 0.345          |
|            |            | B07        |          |                       | 11562<br>9 |            |       | 559                         |                          |                |
| U018       | Abeta 1-38 | C07        | 2        | N/A                   | 5008       | 5100       | 2.55  | 870                         | 879                      | 1.51           |
|            |            | C08        |          |                       | 5192       |            |       | 889                         |                          |                |
|            | Abeta 1-40 | C07        | 2        | N/A                   | 30137      | 30285      | 0.689 | 2033                        | 2039                     | 0.446          |
|            |            | C08        |          |                       | 30432      |            |       | 2045                        |                          |                |

Plate: Plate\_\*25D10AU386G\*

| Sample *   | Assay      | Well       | Dilution | Concentration (pg/ml) | Signal | Mean  | CV    | Calc. Concentration (pg/ml) | Calc. Conc. Mean (pg/ml) | Calc. Conc. CV |     |
|------------|------------|------------|----------|-----------------------|--------|-------|-------|-----------------------------|--------------------------|----------------|-----|
|            | Abeta 1-42 | C08        | 2        | N/A                   | 5513   | 5422  | 2.39  | 57.9                        | 57.2                     | 1.76           |     |
|            |            | C07        |          |                       | 5330   |       |       | 56.5                        |                          |                |     |
| U019       | Abeta 1-38 | D07        | 2        | N/A                   | 23661  | 23783 | 0.725 | 2176                        | 2183                     | 0.429          |     |
|            |            | D08        |          |                       | 23905  |       |       | 2189                        |                          |                |     |
|            | Abeta 1-40 | D07        | 2        | N/A                   | 10371  | 10899 | 6.85  | 4695                        | 4868                     | 5.02           |     |
|            |            | D08        |          |                       | 11426  |       |       | 5041                        |                          |                |     |
|            | Abeta 1-42 | D07        | 2        | N/A                   | 73760  | 73843 | 0.158 | 396                         | 396                      | 0.12           |     |
|            |            | D08        |          |                       | 73925  |       |       | 396                         |                          |                |     |
|            | U020       | Abeta 1-38 | E07      | 2                     | N/A    | 21615 | 21641 | 0.17                        | 2063                     | 2064           | 0.1 |
|            |            |            | E08      |                       |        | 21667 |       |                             | 2066                     |                |     |
| Abeta 1-40 |            | E07        | 2        | N/A                   | 86826  | 90571 | 5.85  | 4134                        | 4259                     | 4.16           |     |
|            |            | E08        |          |                       | 94316  |       |       | 4385                        |                          |                |     |
| Abeta 1-42 |            | E08        | 2        | N/A                   | 47652  | 46506 | 3.49  | 285                         | 280                      | 2.61           |     |
|            |            | E07        |          |                       | 45359  |       |       | 275                         |                          |                |     |
| U021       | Abeta 1-38 | F07        | 2        | N/A                   | 49127  | 50112 | 2.78  | 3360                        | 3400                     | 1.67           |     |
|            |            | F08        |          |                       | 51097  |       |       | 3440                        |                          |                |     |
|            | Abeta 1-40 | F08        | 2        | N/A                   | 17997  | 17716 | 2.24  | 7187                        | 7093                     | 1.86           |     |
|            |            | F07        |          |                       | 17435  |       |       | 7000                        |                          |                |     |
|            | Abeta 1-42 | F08        | 2        | N/A                   | 54073  | 53513 | 1.48  | 313                         | 311                      | 1.11           |     |
|            |            | F07        |          |                       | 52953  |       |       | 308                         |                          |                |     |
| U022       | Abeta 1-38 | G07        | 2        | N/A                   | 16783  | 17559 | 6.25  | 1777                        | 1824                     | 3.69           |     |
|            |            | G08        |          |                       | 18335  |       |       | 1872                        |                          |                |     |
|            | Abeta 1-40 | G07        | 2        | N/A                   | 73829  | 76845 | 5.55  | 3691                        | 3795                     | 3.86           |     |
|            |            | G08        |          |                       | 79860  |       |       | 3898                        |                          |                |     |

Plate: Plate\_\*25D10AU386G\*

| Sample * | Assay      | Well | Dilution | Concentration (pg/ml) | Signal     | Mean       | CV    | Calc. Concentration (pg/ml) | Calc. Conc. Mean (pg/ml) | Calc. Conc. CV |
|----------|------------|------|----------|-----------------------|------------|------------|-------|-----------------------------|--------------------------|----------------|
|          | Abeta 1-42 | G07  | 2        | N/A                   | 37813      | 38834      | 3.72  | 240                         | 244                      | 2.77           |
|          |            | G08  |          |                       | 39855      |            |       | 249                         |                          |                |
| U023     | Abeta 1-38 | H07  | 2        | N/A                   | 6911       | 6999       | 1.77  | 1053                        | 1060                     | 1.04           |
|          |            | H08  |          |                       | 7086       |            |       | 1068                        |                          |                |
|          | Abeta 1-40 | H07  | 2        | N/A                   | 32620      | 33487      | 3.66  | 2140                        | 2176                     | 2.38           |
|          |            | H08  |          |                       | 34353      |            |       | 2213                        |                          |                |
|          | Abeta 1-42 | H08  | 2        | N/A                   | 16438      | 16550      | 0.953 | 129                         | 130                      | 0.702          |
|          |            | H07  |          |                       | 16661      |            |       | 131                         |                          |                |
| U024     | Abeta 1-38 | A10  | 2        | N/A                   | 21942      | 22429      | 3.07  | 2081                        | 2108                     | 1.81           |
|          |            | A09  |          |                       | 22915      |            |       | 2135                        |                          |                |
|          | Abeta 1-40 | A09  | 2        | N/A                   | 10400<br>7 | 10784<br>3 | 5.03  | 4705                        | 4831                     | 3.68           |
|          |            | A10  |          |                       | 11167<br>9 |            |       | 4956                        |                          |                |
|          | Abeta 1-42 | A10  | 2        | N/A                   | 21038      | 21909      | 5.62  | 155                         | 160                      | 4.15           |
|          |            | A09  |          |                       | 22779      |            |       | 165                         |                          |                |
| U025     | Abeta 1-38 | B10  | 2        | N/A                   | 11418      | 11786      | 4.42  | 1416                        | 1442                     | 2.6            |
|          |            | B09  |          |                       | 12154      |            |       | 1469                        |                          |                |
|          | Abeta 1-40 | B10  | 2        | N/A                   | 65312      | 63472      | 4.1   | 3393                        | 3327                     | 2.79           |
|          |            | B09  |          |                       | 61631      |            |       | 3262                        |                          |                |
|          | Abeta 1-42 | B10  | 2        | N/A                   | 28502      | 29143      | 3.11  | 194                         | 198                      | 2.3            |
|          |            | B09  |          |                       | 29784      |            |       | 201                         |                          |                |
| U026     | Abeta 1-38 | C09  | 2        | N/A                   | 9777       | 9952       | 2.48  | 1292                        | 1305                     | 1.46           |
|          |            | C10  |          |                       | 10126      |            |       | 1319                        |                          |                |
|          | Abeta 1-40 | C10  | 2        | N/A                   | 50108      | 51003      | 2.48  | 2838                        | 2871                     | 1.66           |
|          |            | C09  |          |                       | 51897      |            |       | 2905                        |                          |                |
|          | Abeta 1-42 | C09  | 2        | N/A                   | 24347      | 24210      | 0.8   | 173                         | 172                      | 0.591          |
|          |            | C10  |          |                       | 24073      |            |       | 172                         |                          |                |



Plate: Plate\_\*25D1OAU386G\*

| Sample * | Assay      | Well | Dilution | Concentration (pg/ml) | Signal | Mean   | CV    | Calc. Concentration (pg/ml) | Calc. Conc. Mean (pg/ml) | Calc. Conc. CV |
|----------|------------|------|----------|-----------------------|--------|--------|-------|-----------------------------|--------------------------|----------------|
| U027     | Abeta 1-38 | D10  | 2        | N/A                   | 49600  | 49315  | 0.817 | 3379                        | 3368                     | 0.489          |
|          |            | D09  |          |                       | 49030  |        |       | 3356                        |                          |                |
|          | Abeta 1-40 | D10  | 2        | N/A                   | 196919 | 196475 | 0.32  | 7755                        | 7740                     | 0.275          |
|          |            | D09  |          |                       | 196030 |        |       | 7725                        |                          |                |
|          | Abeta 1-42 | D10  | 2        | N/A                   | 58553  | 58627  | 0.177 | 332                         | 333                      | 0.133          |
|          |            | D09  |          |                       | 58700  |        |       | 333                         |                          |                |
| U028     | Abeta 1-38 | E10  | 2        | N/A                   | 19625  | 19887  | 1.86  | 1948                        | 1964                     | 1.1            |
|          |            | E09  |          |                       | 20148  |        |       | 1979                        |                          |                |
|          | Abeta 1-40 | E10  | 2        | N/A                   | 101260 | 100510 | 1.06  | 4614                        | 4590                     | 0.763          |
|          |            | E09  |          |                       | 99759  |        |       | 4565                        |                          |                |
|          | Abeta 1-42 | E10  | 2        | N/A                   | 87330  | 88299  | 1.55  | 450                         | 454                      | 1.19           |
|          |            | E09  |          |                       | 89268  |        |       | 458                         |                          |                |
| U029     | Abeta 1-38 | F10  | 2        | N/A                   | 28616  | 28756  | 0.689 | 2436                        | 2443                     | 0.408          |
|          |            | F09  |          |                       | 28896  |        |       | 2450                        |                          |                |
|          | Abeta 1-40 | F10  | 2        | N/A                   | 134438 | 130143 | 4.67  | 5696                        | 5557                     | 3.55           |
|          |            | F09  |          |                       | 125847 |        |       | 5417                        |                          |                |
|          | Abeta 1-42 | F09  | 2        | N/A                   | 99159  | 99513  | 0.502 | 496                         | 498                      | 0.388          |
|          |            | F10  |          |                       | 99866  |        |       | 499                         |                          |                |
| U030     | Abeta 1-38 | G10  | 2        | N/A                   | 25226  | 24805  | 2.4   | 2260                        | 2238                     | 1.42           |
|          |            | G09  |          |                       | 24384  |        |       | 2215                        |                          |                |
|          | Abeta 1-40 | G10  | 2        | N/A                   | 107414 | 105865 | 2.07  | 4817                        | 4766                     | 1.51           |
|          |            | G09  |          |                       | 104316 |        |       | 4715                        |                          |                |

Plate: Plate\_\*25D1OAU386G\*

| Sample * | Assay      | Well | Dilution | Concentration (pg/ml) | Signal     | Mean       | CV   | Calc. Concentration (pg/ml) | Calc. Conc. Mean (pg/ml) | Calc. Conc. CV |
|----------|------------|------|----------|-----------------------|------------|------------|------|-----------------------------|--------------------------|----------------|
|          | Abeta 1-42 | G09  | 2        | N/A                   | 60862      | 60914      | 0.12 | 342                         | 342                      | 0.09           |
|          |            | G10  |          |                       | 60965      |            |      | 343                         |                          |                |
| U031     | Abeta 1-38 | H09  | 2        | N/A                   | 2649       | 2699       | 2.62 | 595                         | 602                      | 1.57           |
|          |            | H10  |          |                       | 2749       |            |      | 608                         |                          |                |
|          | Abeta 1-40 | H10  | 2        | N/A                   | 14412      | 14165      | 2.47 | 1268                        | 1254                     | 1.56           |
|          |            | H09  |          |                       | 13918      |            |      | 1240                        |                          |                |
|          | Abeta 1-42 | H10  | 2        | N/A                   | 6910       | 6817       | 1.93 | 68.4                        | 67.7                     | 1.42           |
|          |            | H09  |          |                       | 6724       |            |      | 67                          |                          |                |
| U032     | Abeta 1-38 | A11  | 2        | N/A                   | 42617      | 38201      | 16.3 | 3086                        | 2887                     | 9.76           |
|          |            | A12  |          |                       | 33785      |            |      | 2688                        |                          |                |
|          | Abeta 1-40 | A11  | 2        | N/A                   | 20163<br>8 | 19523<br>5 | 4.64 | 7916                        | 7699                     | 3.98           |
|          |            | A12  |          |                       | 18883<br>1 |            |      | 7482                        |                          |                |
|          | Abeta 1-42 | A11  | 2        | N/A                   | 53359      | 51281      | 5.73 | 310                         | 301                      | 4.3            |
|          |            | A12  |          |                       | 49202      |            |      | 292                         |                          |                |

**Data Grid Legend**

| Name                          | Abbreviation |
|-------------------------------|--------------|
| Assay                         | A:           |
| Assay Results                 | AR:          |
| Calculated Concentration      | CC:          |
| Calculated Concentration C.V. | CCCV:        |
| Calculated Concentration Mean | CCM:         |
| Calculated Concentration S.D. | CCSD:        |
| Concentrations                | C:           |
| Detection Range               | DR:          |
| Dilutions                     | D:           |
| % Recovery                    | %R:          |
| % Recovery Mean               | %RM:         |
| Sample                        | S:           |
| Sample Group                  | SG:          |
| Signal C.V.                   | CV:          |
| Signal Mean                   | M:           |
| Signal                        | R:           |
| Signal S.D.                   | SD:          |

## Data Grid - Abeta 1-40

|          | 1                                  | 2                                  | 3                     | 4                     | 5                     | 6                     | 7                     | 8                     | 9                     | 10                    | 11                               | 12                               |
|----------|------------------------------------|------------------------------------|-----------------------|-----------------------|-----------------------|-----------------------|-----------------------|-----------------------|-----------------------|-----------------------|----------------------------------|----------------------------------|
| <b>A</b> | R: 584198<br>C: 15316<br>CC: 18869 | R: 550462<br>C: 15316<br>CC: 15521 | R: 100351<br>CC: 4584 | R: 95617<br>CC: 4428  | R: 129239<br>CC: 5528 | R: 138918<br>CC: 5842 | R: 130697<br>CC: 5575 | R: 141281<br>CC: 5918 | R: 104007<br>CC: 4705 | R: 111679<br>CC: 4956 | R: 201638<br>CC: 7916            | R: 188831<br>CC: 7482            |
| <b>B</b> | R: 180707<br>C: 3829<br>CC: 3605   | R: 173093<br>C: 3829<br>CC: 3479   | R: 139216<br>CC: 5851 | R: 133095<br>CC: 5653 | R: 77114<br>CC: 3804  | R: 76531<br>CC: 3784  | R: 131238<br>CC: 5592 | R: 133891<br>CC: 5678 | R: 61631<br>CC: 3262  | R: 65312<br>CC: 3393  | R: 103615<br>CC: 4692            | R: 101377<br>CC: 4618            |
| <b>C</b> | R: 29121<br>C: 957<br>CC: 994      | R: 31741<br>C: 957<br>CC: 1051     | R: 25631<br>CC: 1831  | R: 26394<br>CC: 1866  | R: 182440<br>CC: 7269 | R: 188194<br>CC: 7461 | R: 30137<br>CC: 2033  | R: 30432<br>CC: 2045  | R: 51897<br>CC: 2905  | R: 50108<br>CC: 2838  | R: 174240<br>C: 3829<br>CC: 3498 | R: 165260<br>C: 3829<br>CC: 3350 |
| <b>D</b> | R: 3285<br>C: 239<br>CC: 249       | R: 3203<br>C: 239<br>CC: 245       | R: 119567<br>CC: 5213 | R: 126946<br>CC: 5453 | R: 191327<br>CC: 7566 | R: 200569<br>CC: 7879 | R: 103712<br>CC: 4695 | R: 114267<br>CC: 5041 | R: 196030<br>CC: 7725 | R: 196919<br>CC: 7755 | R: 30128<br>C: 957<br>CC: 1016   | R: 27398<br>C: 957<br>CC: 956    |
| <b>E</b> | R: 354<br>C: 59.8<br>CC: 54.9      | R: 379<br>C: 59.8<br>CC: 57.9      | R: 133645<br>CC: 5671 | R: 136567<br>CC: 5765 | R: 186238<br>CC: 7395 | R: 181657<br>CC: 7243 | R: 86826<br>CC: 4134  | R: 94316<br>CC: 4385  | R: 99759<br>CC: 4565  | R: 101260<br>CC: 4614 | R: 3419<br>C: 239<br>CC: 255     | R: 3136<br>C: 239<br>CC: 242     |
| <b>F</b> | R: 102<br>C: 15<br>CC: 13.3        | R: 122<br>C: 15<br>CC: 18.5        | R: 126807<br>CC: 5449 | R: 169552<br>CC: 6842 | R: 163771<br>CC: 6652 | R: 164918<br>CC: 6689 | R: 174357<br>CC: 7000 | R: 179979<br>CC: 7187 | R: 125847<br>CC: 5417 | R: 134438<br>CC: 5696 | R: 366<br>C: 59.8<br>CC: 56.4    | R: 359<br>C: 59.8<br>CC: 55.5    |
| <b>G</b> | R: 75<br>C: 3.74<br>CC: 2.03       | R: 78<br>C: 3.74<br>CC: 4.18       | R: 55810<br>CC: 3050  | R: 55785<br>CC: 3049  | R: 171893<br>CC: 6919 | R: 170152<br>CC: 6861 | R: 73829<br>CC: 3691  | R: 79860<br>CC: 3898  | R: 104316<br>CC: 4715 | R: 107414<br>CC: 4817 | R: 164389<br>CC: 6672            | R: 155474<br>CC: 6380            |
| <b>H</b> | R: 66                              | R: 70                              | R: 43051<br>CC: 2566  | R: 44492<br>CC: 2622  | R: 130171<br>CC: 5558 | R: 117883<br>CC: 5159 | R: 32620<br>CC: 2140  | R: 34353<br>CC: 2213  | R: 13918<br>CC: 1240  | R: 14412<br>CC: 1268  | R: 80386<br>CC: 3916             | R: 73815<br>CC: 3691             |

## Data Grid - Abeta 1-38

|          | 1                                  | 2                                  | 3                    | 4                    | 5                    | 6                    | 7                    | 8                    | 9                    | 10                   | 11                              | 12                              |
|----------|------------------------------------|------------------------------------|----------------------|----------------------|----------------------|----------------------|----------------------|----------------------|----------------------|----------------------|---------------------------------|---------------------------------|
| <b>A</b> | R: 714619<br>C: 10763<br>CC: 10406 | R: 756251<br>C: 10763<br>CC: 10986 | R: 14848<br>CC: 1653 | R: 14086<br>CC: 1602 | R: 29756<br>CC: 2493 | R: 30298<br>CC: 2519 | R: 33626<br>CC: 2680 | R: 34083<br>CC: 2702 | R: 22915<br>CC: 2135 | R: 21942<br>CC: 2081 | R: 42617<br>CC: 3086            | R: 33785<br>CC: 2688            |
| <b>B</b> | R: 114908<br>C: 2691<br>CC: 2816   | R: 110647<br>C: 2691<br>CC: 2751   | R: 30958<br>CC: 2552 | R: 30312<br>CC: 2520 | R: 16784<br>CC: 1777 | R: 16734<br>CC: 1774 | R: 28715<br>CC: 2441 | R: 28519<br>CC: 2431 | R: 12154<br>CC: 1469 | R: 11418<br>CC: 1416 | R: 17912<br>CC: 1846            | R: 16537<br>CC: 1761            |
| <b>C</b> | R: 10212<br>C: 673<br>CC: 663      | R: 10256<br>C: 673<br>CC: 664      | R: 4889<br>CC: 858   | R: 4663<br>CC: 834   | R: 49228<br>CC: 3364 | R: 52303<br>CC: 3489 | R: 5008<br>CC: 870   | R: 5192<br>CC: 889   | R: 9777<br>CC: 1292  | R: 10126<br>CC: 1319 | R: 99655<br>C: 2691<br>CC: 2579 | R: 90617<br>C: 2691<br>CC: 2433 |
| <b>D</b> | R: 979<br>C: 168<br>CC: 161        | R: 960<br>C: 168<br>CC: 159        | R: 27317<br>CC: 2369 | R: 28099<br>CC: 2409 | R: 51727<br>CC: 3465 | R: 52702<br>CC: 3504 | R: 23661<br>CC: 2176 | R: 23905<br>CC: 2189 | R: 49030<br>CC: 3356 | R: 49600<br>CC: 3379 | R: 9220<br>C: 673<br>CC: 624    | R: 8873<br>C: 673<br>CC: 610    |
| <b>E</b> | R: 181<br>C: 42<br>CC: 45.6        | R: 198<br>C: 42<br>CC: 49.8        | R: 29568<br>CC: 2483 | R: 31566<br>CC: 2581 | R: 52648<br>CC: 3502 | R: 51862<br>CC: 3471 | R: 21615<br>CC: 2063 | R: 21667<br>CC: 2066 | R: 20148<br>CC: 1979 | R: 19625<br>CC: 1948 | R: 966<br>C: 168<br>CC: 160     | R: 928<br>C: 168<br>CC: 156     |
| <b>F</b> | R: 88<br>C: 10.5<br>CC: 11.5       | R: 92<br>C: 10.5<br>CC: 14.1       | R: 35316<br>CC: 2760 | R: 42786<br>CC: 3094 | R: 43382<br>CC: 3119 | R: 42864<br>CC: 3097 | R: 49127<br>CC: 3360 | R: 51097<br>CC: 3440 | R: 28896<br>CC: 2450 | R: 28616<br>CC: 2436 | R: 179<br>C: 42<br>CC: 45.1     | R: 171<br>C: 42<br>CC: 42.9     |
| <b>G</b> | R: 73<br>C: 2.63<br>CC: 0          | R: 75<br>C: 2.63<br>CC: 0          | R: 11062<br>CC: 1389 | R: 11073<br>CC: 1390 | R: 47319<br>CC: 3285 | R: 44045<br>CC: 3148 | R: 16783<br>CC: 1777 | R: 18335<br>CC: 1872 | R: 24384<br>CC: 2215 | R: 25226<br>CC: 2260 | R: 40907<br>CC: 3012            | R: 38368<br>CC: 2899            |
| <b>H</b> | R: 66                              | R: 71                              | R: 8711<br>CC: 1207  | R: 9187<br>CC: 1245  | R: 34824<br>CC: 2737 | R: 31799<br>CC: 2593 | R: 6911<br>CC: 1053  | R: 7086<br>CC: 1068  | R: 2649<br>CC: 595   | R: 2749<br>CC: 608   | R: 13264<br>CC: 1546            | R: 12769<br>CC: 1512            |

## Data Grid - Abeta 1-42

|          | 1                                | 2                                | 3                    | 4                    | 5                    | 6                    | 7                    | 8                    | 9                   | 10                  | 11                              | 12                              |
|----------|----------------------------------|----------------------------------|----------------------|----------------------|----------------------|----------------------|----------------------|----------------------|---------------------|---------------------|---------------------------------|---------------------------------|
| <b>A</b> | R: 671569<br>C: 1379<br>CC: 1376 | R: 665540<br>C: 1379<br>CC: 1362 | R: 63982<br>CC: 355  | R: 64728<br>CC: 359  | R: 123339<br>CC: 588 | R: 122279<br>CC: 584 | R: 27597<br>CC: 190  | R: 28759<br>CC: 196  | R: 22779<br>CC: 165 | R: 21038<br>CC: 155 | R: 53359<br>CC: 310             | R: 49202<br>CC: 292             |
| <b>B</b> | R: 155001<br>C: 345<br>CC: 352   | R: 153397<br>C: 345<br>CC: 349   | R: 114123<br>CC: 554 | R: 115328<br>CC: 558 | R: 14991<br>CC: 121  | R: 14920<br>CC: 121  | R: 115629<br>CC: 559 | R: 116354<br>CC: 562 | R: 29784<br>CC: 201 | R: 28502<br>CC: 194 | R: 70544<br>CC: 383             | R: 67944<br>CC: 372             |
| <b>C</b> | R: 25296<br>C: 86.2<br>CC: 89    | R: 26088<br>C: 86.2<br>CC: 91    | R: 12361<br>CC: 105  | R: 12336<br>CC: 105  | R: 67084<br>CC: 368  | R: 70748<br>CC: 383  | R: 5330<br>CC: 56.5  | R: 5513<br>CC: 57.9  | R: 24347<br>CC: 173 | R: 24073<br>CC: 172 | R: 140254<br>C: 345<br>CC: 325  | R: 131426<br>C: 345<br>CC: 309  |
| <b>D</b> | R: 3356<br>C: 21.5<br>CC: 20     | R: 3327<br>C: 21.5<br>CC: 19.9   | R: 90774<br>CC: 464  | R: 93339<br>CC: 474  | R: 69325<br>CC: 378  | R: 71529<br>CC: 387  | R: 73760<br>CC: 396  | R: 73925<br>CC: 396  | R: 58700<br>CC: 333 | R: 58553<br>CC: 332 | R: 22023<br>C: 86.2<br>CC: 80.3 | R: 19949<br>C: 86.2<br>CC: 74.7 |
| <b>E</b> | R: 625<br>C: 5.39<br>CC: 5.43    | R: 628<br>C: 5.39<br>CC: 5.45    | R: 100409<br>CC: 501 | R: 105027<br>CC: 519 | R: 69848<br>CC: 380  | R: 68227<br>CC: 373  | R: 45359<br>CC: 275  | R: 47652<br>CC: 285  | R: 89268<br>CC: 458 | R: 87330<br>CC: 450 | R: 3010<br>C: 21.5<br>CC: 18.5  | R: 2959<br>C: 21.5<br>CC: 18.2  |
| <b>F</b> | R: 168<br>C: 1.35<br>CC: 1.42    | R: 194<br>C: 1.35<br>CC: 1.72    | R: 48804<br>CC: 290  | R: 56680<br>CC: 324  | R: 39270<br>CC: 247  | R: 38093<br>CC: 241  | R: 52953<br>CC: 308  | R: 54073<br>CC: 313  | R: 99159<br>CC: 496 | R: 99866<br>CC: 499 | R: 565<br>C: 5.39<br>CC: 4.98   | R: 531<br>C: 5.39<br>CC: 4.73   |
| <b>G</b> | R: 90<br>C: 0.337<br>CC: 0.237   | R: 90<br>C: 0.337<br>CC: 0.237   | R: 9641<br>CC: 87.4  | R: 9594<br>CC: 87.1  | R: 49045<br>CC: 291  | R: 48247<br>CC: 287  | R: 37813<br>CC: 240  | R: 39855<br>CC: 249  | R: 60862<br>CC: 342 | R: 60965<br>CC: 343 | R: 53404<br>CC: 310             | R: 50959<br>CC: 299             |
| <b>H</b> | R: 58                            | R: 68                            | R: 7746<br>CC: 74.4  | R: 7899<br>CC: 75.5  | R: 25165<br>CC: 177  | R: 24078<br>CC: 172  | R: 16661<br>CC: 131  | R: 16438<br>CC: 129  | R: 6724<br>CC: 67   | R: 6910<br>CC: 68.4 | R: 51008<br>CC: 300             | R: 46376<br>CC: 279             |

## Standard Data Table

Plate: Plate\_\*25D1OAU386G\*

Assay: Abeta 1-38

Group: Standard

| Sample # | Well | Concentration (pg/ml) | Signal | Mean   | CV    | Calc. Concentration (pg/ml) | Calc. Conc. Mean (pg/ml) | Calc. Conc. CV |
|----------|------|-----------------------|--------|--------|-------|-----------------------------|--------------------------|----------------|
| S001     | A01  | 10763                 | 714619 | 735435 | 4     | 10406                       | 10696                    | 3.84           |
|          | A02  |                       | 756251 |        |       | 10986                       |                          |                |
| S002     | B02  | 2691                  | 110647 | 112778 | 2.67  | 2751                        | 2784                     | 1.66           |
|          | B01  |                       | 114908 |        |       | 2816                        |                          |                |
| S003     | C01  | 673                   | 10212  | 10234  | 0.304 | 663                         | 664                      | 0.179          |
|          | C02  |                       | 10256  |        |       | 664                         |                          |                |
| S004     | D02  | 168                   | 960    | 970    | 1.39  | 159                         | 160                      | 0.878          |
|          | D01  |                       | 979    |        |       | 161                         |                          |                |
| S005     | E02  | 42                    | 198    | 190    | 6.34  | 49.8                        | 47.7                     | 6.31           |
|          | E01  |                       | 181    |        |       | 45.6                        |                          |                |
| S006     | F02  | 10.5                  | 92     | 90     | 3.14  | 14.1                        | 12.8                     | 14.3           |
|          | F01  |                       | 88     |        |       | 11.5                        |                          |                |
| S007     | G01  | 2.63                  | 73     | 74     | 1.91  | 0                           | 0                        | N/A            |
|          | G02  |                       | 75     |        |       | 0                           |                          |                |

## Standard Analysis Properties

| Name                       | Value                                             |
|----------------------------|---------------------------------------------------|
| Algorithm Parameters       |                                                   |
| Initial Top                | 742789                                            |
| Initial Bottom             | 66.6                                              |
| Initial MidPoint           | 5996                                              |
| Initial HillSlope          | 1                                                 |
| Weighting                  | 1/y^2                                             |
| Max Iteration              | 500                                               |
| Fit Statistics             |                                                   |
| RSquared                   | 1                                                 |
| Calculated Parameters      |                                                   |
| Top                        | 1873552                                           |
| Bottom                     | 78.4                                              |
| MidPoint                   | 13789                                             |
| HillSlope                  | 1.72                                              |
| Detection Range Parameters |                                                   |
| Low                        | 20.4                                              |
| High                       | 10763                                             |
| Equation                   |                                                   |
| FourPL                     | $y = b_2 + \frac{b_1 - b_2}{1 + (x / b_3)^{b_4}}$ |



## Unknown Data Table

Plate: Plate\_\*25D1OAU386G\*

Assay: Abeta 1-38

Group: Unknown

| Sample #   | Well | Signal | Mean  | CV    | Calc. Concentration (pg/ml) | Calc. Conc. Mean (pg/ml) | Calc. Conc. CV |
|------------|------|--------|-------|-------|-----------------------------|--------------------------|----------------|
| Control 1  | A03  | 14848  | 14467 | 3.72  | 1653                        | 1627                     | 2.2            |
|            | A04  | 14086  |       |       | 1602                        |                          |                |
| Control 2  | H11  | 13264  | 13017 | 2.69  | 1546                        | 1529                     | 1.59           |
|            | H12  | 12769  |       |       | 1512                        |                          |                |
| NAD1 Alpha | G11  | 40907  | 39638 | 4.53  | 3012                        | 2955                     | 2.7            |
|            | G12  | 38368  |       |       | 2899                        |                          |                |
| NCT1 Alpha | B11  | 17912  | 17225 | 5.64  | 1846                        | 1804                     | 3.33           |
|            | B12  | 16537  |       |       | 1761                        |                          |                |
| U001       | B03  | 30958  | 30635 | 1.49  | 2552                        | 2536                     | 0.885          |
|            | B04  | 30312  |       |       | 2520                        |                          |                |
| U002       | C03  | 4889   | 4776  | 3.35  | 858                         | 846                      | 1.99           |
|            | C04  | 4663   |       |       | 834                         |                          |                |
| U003       | D04  | 28099  | 27708 | 2     | 2409                        | 2389                     | 1.18           |
|            | D03  | 27317  |       |       | 2369                        |                          |                |
| U004       | E03  | 29568  | 30567 | 4.62  | 2483                        | 2532                     | 2.74           |
|            | E04  | 31566  |       |       | 2581                        |                          |                |
| U005       | F03  | 35316  | 39051 | 13.5  | 2760                        | 2927                     | 8.07           |
|            | F04  | 42786  |       |       | 3094                        |                          |                |
| U006       | G03  | 11062  | 11068 | 0.07  | 1389                        | 1390                     | 0.041          |
|            | G04  | 11073  |       |       | 1390                        |                          |                |
| U007       | H03  | 8711   | 8949  | 3.76  | 1207                        | 1226                     | 2.22           |
|            | H04  | 9187   |       |       | 1245                        |                          |                |
| U008       | A06  | 30298  | 30027 | 1.28  | 2519                        | 2506                     | 0.757          |
|            | A05  | 29756  |       |       | 2493                        |                          |                |
| U009       | B06  | 16734  | 16759 | 0.211 | 1774                        | 1775                     | 0.124          |

Plate: Plate\_\*25D1OAU386G\*

Assay: Abeta 1-38

Group: Unknown

| Sample # | Well | Signal | Mean  | CV    | Calc. Concentration (pg/ml) | Calc. Conc. Mean (pg/ml) | Calc. Conc. CV |
|----------|------|--------|-------|-------|-----------------------------|--------------------------|----------------|
|          | B05  | 16784  |       |       | 1777                        |                          |                |
| U010     | C05  | 49228  | 50766 | 4.28  | 3364                        | 3426                     | 2.57           |
|          | C06  | 52303  |       |       | 3489                        |                          |                |
| U011     | D06  | 52702  | 52215 | 1.32  | 3504                        | 3485                     | 0.792          |
|          | D05  | 51727  |       |       | 3465                        |                          |                |
| U012     | E06  | 51862  | 52255 | 1.06  | 3471                        | 3487                     | 0.638          |
|          | E05  | 52648  |       |       | 3502                        |                          |                |
| U013     | F05  | 43382  | 43123 | 0.849 | 3119                        | 3108                     | 0.507          |
|          | F06  | 42864  |       |       | 3097                        |                          |                |
| U014     | G06  | 44045  | 45682 | 5.07  | 3148                        | 3217                     | 3.03           |
|          | G05  | 47319  |       |       | 3285                        |                          |                |
| U015     | H06  | 31799  | 33312 | 6.42  | 2593                        | 2665                     | 3.82           |
|          | H05  | 34824  |       |       | 2737                        |                          |                |
| U016     | A08  | 34083  | 33855 | 0.955 | 2702                        | 2691                     | 0.567          |
|          | A07  | 33626  |       |       | 2680                        |                          |                |
| U017     | B07  | 28715  | 28617 | 0.484 | 2441                        | 2436                     | 0.287          |
|          | B08  | 28519  |       |       | 2431                        |                          |                |
| U018     | C07  | 5008   | 5100  | 2.55  | 870                         | 879                      | 1.51           |
|          | C08  | 5192   |       |       | 889                         |                          |                |
| U019     | D07  | 23661  | 23783 | 0.725 | 2176                        | 2183                     | 0.429          |
|          | D08  | 23905  |       |       | 2189                        |                          |                |
| U020     | E07  | 21615  | 21641 | 0.17  | 2063                        | 2064                     | 0.1            |
|          | E08  | 21667  |       |       | 2066                        |                          |                |
| U021     | F07  | 49127  | 50112 | 2.78  | 3360                        | 3400                     | 1.67           |
|          | F08  | 51097  |       |       | 3440                        |                          |                |
| U022     | G07  | 16783  | 17559 | 6.25  | 1777                        | 1824                     | 3.69           |
|          | G08  | 18335  |       |       | 1872                        |                          |                |

Plate: Plate\_\*25D1OAU386G\*

Assay: Abeta 1-38

Group: Unknown

| Sample # | Well | Signal | Mean  | CV    | Calc. Concentration (pg/ml) | Calc. Conc. Mean (pg/ml) | Calc. Conc. CV |
|----------|------|--------|-------|-------|-----------------------------|--------------------------|----------------|
| U023     | H07  | 6911   | 6999  | 1.77  | 1053                        | 1060                     | 1.04           |
|          | H08  | 7086   |       |       | 1068                        |                          |                |
| U024     | A10  | 21942  | 22429 | 3.07  | 2081                        | 2108                     | 1.81           |
|          | A09  | 22915  |       |       | 2135                        |                          |                |
| U025     | B10  | 11418  | 11786 | 4.42  | 1416                        | 1442                     | 2.6            |
|          | B09  | 12154  |       |       | 1469                        |                          |                |
| U026     | C09  | 9777   | 9952  | 2.48  | 1292                        | 1305                     | 1.46           |
|          | C10  | 10126  |       |       | 1319                        |                          |                |
| U027     | D10  | 49600  | 49315 | 0.817 | 3379                        | 3368                     | 0.489          |
|          | D09  | 49030  |       |       | 3356                        |                          |                |
| U028     | E10  | 19625  | 19887 | 1.86  | 1948                        | 1964                     | 1.1            |
|          | E09  | 20148  |       |       | 1979                        |                          |                |
| U029     | F10  | 28616  | 28756 | 0.689 | 2436                        | 2443                     | 0.408          |
|          | F09  | 28896  |       |       | 2450                        |                          |                |
| U030     | G10  | 25226  | 24805 | 2.4   | 2260                        | 2238                     | 1.42           |
|          | G09  | 24384  |       |       | 2215                        |                          |                |
| U031     | H09  | 2649   | 2699  | 2.62  | 595                         | 602                      | 1.57           |
|          | H10  | 2749   |       |       | 608                         |                          |                |
| U032     | A11  | 42617  | 38201 | 16.3  | 3086                        | 2887                     | 9.76           |
|          | A12  | 33785  |       |       | 2688                        |                          |                |

**Blank Data Table**

Plate: Plate\_\*25D1OAU386G\*

Assay: Abeta 1-38

Group: Blank

| Sample * | Well | Signal | Mean | CV   |
|----------|------|--------|------|------|
| B001     | H02  | 71     | 69   | 5.16 |
|          | H01  | 66     |      |      |

**Control Data Table**

Plate: Plate\_\*25D10AU386G\*

Assay: Abeta 1-38

Group: Control

| Sample * | Well | Concentration (pg/ml) | Signal | Mean  | CV   | % Recovery | % Recovery Mean | Calc. Concentration (pg/ml) | Calc. Conc. Mean (pg/ml) | Calc. Conc. CV |
|----------|------|-----------------------|--------|-------|------|------------|-----------------|-----------------------------|--------------------------|----------------|
| STD 2    | C12  | 2691                  | 90617  | 95136 | 6.72 | 90.4       | 93.1            | 2433                        | 2506                     | 4.12           |
|          | C11  |                       | 99655  |       |      | 95.8       |                 | 2579                        |                          |                |
| STD 3    | D12  | 673                   | 8873   | 9047  | 2.71 | 90.7       | 91.7            | 610                         | 617                      | 1.6            |
|          | D11  |                       | 9220   |       |      | 92.7       |                 | 624                         |                          |                |
| STD 4    | E11  | 168                   | 966    | 947   | 2.84 | 95.2       | 94              | 160                         | 158                      | 1.8            |
|          | E12  |                       | 928    |       |      | 92.8       |                 | 156                         |                          |                |
| STD 5    | F12  | 42                    | 171    | 175   | 3.23 | 102        | 105             | 42.9                        | 44                       | 3.41           |
|          | F11  |                       | 179    |       |      | 107        |                 | 45.1                        |                          |                |

Plot: Standard 38

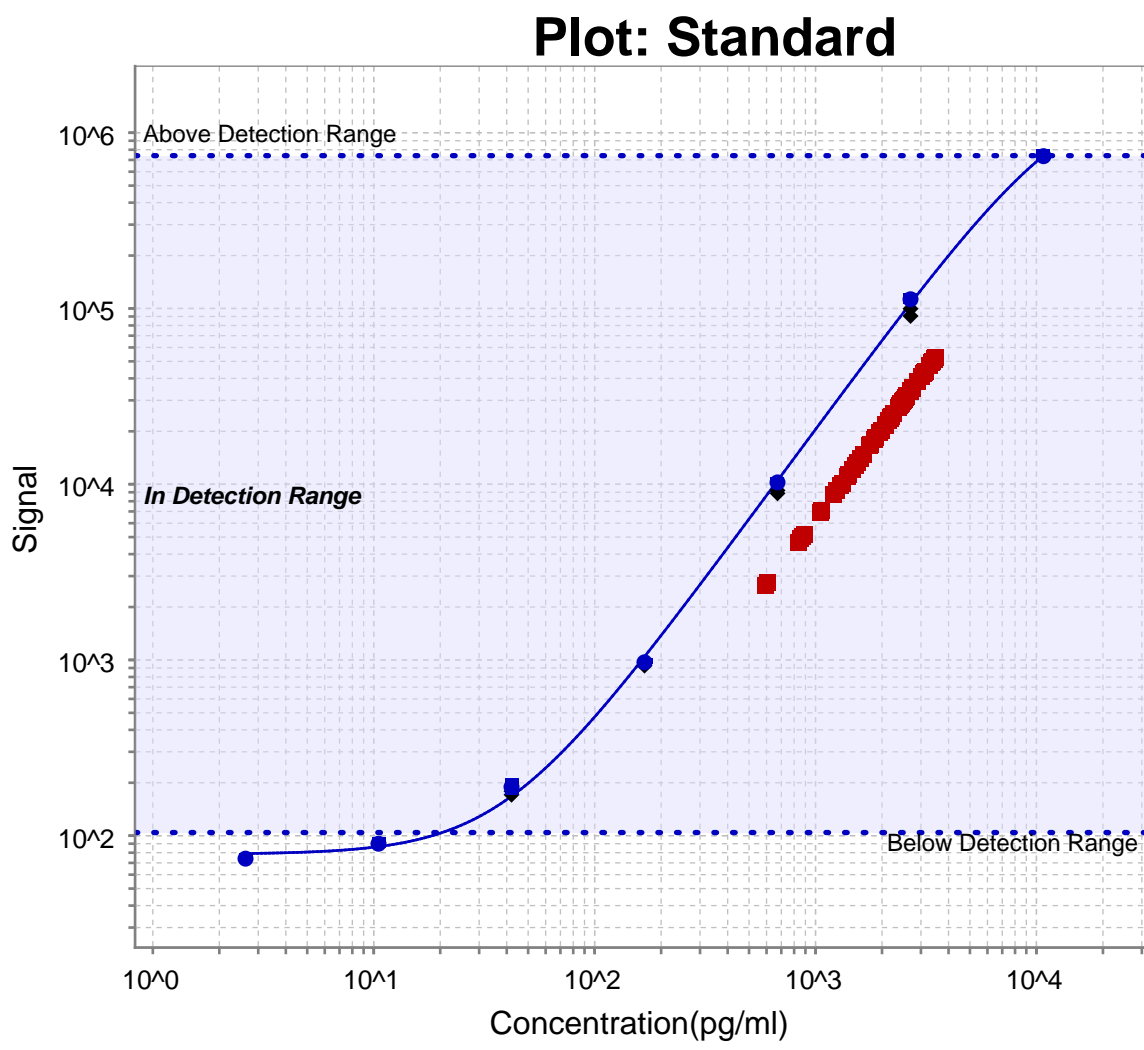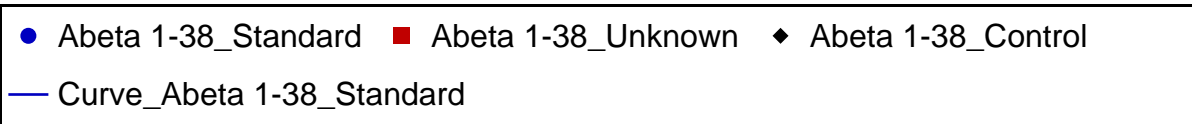

## Standard Data Table

Plate: Plate\_\*25D1OAU386G\*

Assay: Abeta 1-40

Group: Standard

| Sample * | Well | Concentration (pg/ml) | Signal | Mean   | CV   | Calc. Concentration (pg/ml) | Calc. Conc. Mean (pg/ml) | Calc. Conc. CV |
|----------|------|-----------------------|--------|--------|------|-----------------------------|--------------------------|----------------|
| S001     | A02  | 15316                 | 550462 | 567330 | 4.2  | 15521                       | 17195                    | 13.8           |
|          | A01  |                       | 584198 |        |      | 18869                       |                          |                |
| S002     | B01  | 3829                  | 180707 | 176900 | 3.04 | 3605                        | 3542                     | 2.52           |
|          | B02  |                       | 173093 |        |      | 3479                        |                          |                |
| S003     | C02  | 957                   | 31741  | 30431  | 6.09 | 1051                        | 1022                     | 3.95           |
|          | C01  |                       | 29121  |        |      | 994                         |                          |                |
| S004     | D02  | 239                   | 3203   | 3244   | 1.79 | 245                         | 247                      | 1.14           |
|          | D01  |                       | 3285   |        |      | 249                         |                          |                |
| S005     | E01  | 59.8                  | 354    | 367    | 4.82 | 54.9                        | 56.4                     | 3.74           |
|          | E02  |                       | 379    |        |      | 57.9                        |                          |                |
| S006     | F01  | 15                    | 102    | 112    | 12.6 | 13.3                        | 15.9                     | 23.1           |
|          | F02  |                       | 122    |        |      | 18.5                        |                          |                |
| S007     | G02  | 3.74                  | 78     | 77     | 2.77 | 4.18                        | 3.11                     | 49             |
|          | G01  |                       | 75     |        |      | 2.03                        |                          |                |

## Standard Analysis Properties

| Name                       | Value                                             |
|----------------------------|---------------------------------------------------|
| Algorithm Parameters       |                                                   |
| Initial Top                | 573003                                            |
| Initial Bottom             | 68.9                                              |
| Initial MidPoint           | 6971                                              |
| Initial HillSlope          | 1                                                 |
| Weighting                  | 1/y^2                                             |
| Max Iteration              | 500                                               |
| Fit Statistics             |                                                   |
| RSquared                   | 0.998                                             |
| Calculated Parameters      |                                                   |
| Top                        | 699635                                            |
| Bottom                     | 73.6                                              |
| MidPoint                   | 6924                                              |
| HillSlope                  | 1.62                                              |
| Detection Range Parameters |                                                   |
| Low                        | 13.4                                              |
| High                       | 15316                                             |
| Equation                   |                                                   |
| FourPL                     | $y = b_2 + \frac{b_1 - b_2}{1 + (x / b_3)^{b_4}}$ |



## Unknown Data Table

Plate: Plate\_\*25D1OAU386G\*

Assay: Abeta 1-40

Group: Unknown

| Sample #   | Well | Signal | Mean   | CV    | Calc. Concentration (pg/ml) | Calc. Conc. Mean (pg/ml) | Calc. Conc. CV |
|------------|------|--------|--------|-------|-----------------------------|--------------------------|----------------|
| Control 1  | A04  | 95617  | 97984  | 3.42  | 4428                        | 4506                     | 2.46           |
|            | A03  | 100351 |        |       | 4584                        |                          |                |
| Control 2  | H11  | 80386  | 77101  | 6.03  | 3916                        | 3803                     | 4.19           |
|            | H12  | 73815  |        |       | 3691                        |                          |                |
| NAD1 Alpha | G11  | 164389 | 159932 | 3.94  | 6672                        | 6526                     | 3.16           |
|            | G12  | 155474 |        |       | 6380                        |                          |                |
| NCT1 Alpha | B11  | 103615 | 102496 | 1.54  | 4692                        | 4655                     | 1.12           |
|            | B12  | 101377 |        |       | 4618                        |                          |                |
| U001       | B03  | 139216 | 136156 | 3.18  | 5851                        | 5752                     | 2.44           |
|            | B04  | 133095 |        |       | 5653                        |                          |                |
| U002       | C03  | 25631  | 26013  | 2.07  | 1831                        | 1848                     | 1.34           |
|            | C04  | 26394  |        |       | 1866                        |                          |                |
| U003       | D04  | 126946 | 123257 | 4.23  | 5453                        | 5333                     | 3.18           |
|            | D03  | 119567 |        |       | 5213                        |                          |                |
| U004       | E03  | 133645 | 135106 | 1.53  | 5671                        | 5718                     | 1.17           |
|            | E04  | 136567 |        |       | 5765                        |                          |                |
| U005       | F03  | 126807 | 148180 | 20.4  | 5449                        | 6145                     | 16             |
|            | F04  | 169552 |        |       | 6842                        |                          |                |
| U006       | G03  | 55810  | 55798  | 0.032 | 3050                        | 3050                     | 0.021          |
|            | G04  | 55785  |        |       | 3049                        |                          |                |
| U007       | H03  | 43051  | 43772  | 2.33  | 2566                        | 2594                     | 1.54           |
|            | H04  | 44492  |        |       | 2622                        |                          |                |
| U008       | A06  | 138918 | 134079 | 5.1   | 5842                        | 5685                     | 3.91           |
|            | A05  | 129239 |        |       | 5528                        |                          |                |
| U009       | B06  | 76531  | 76823  | 0.537 | 3784                        | 3794                     | 0.373          |

Plate: Plate\_\*25D1OAU386G\*

Assay: Abeta 1-40

Group: Unknown

| Sample # | Well | Signal | Mean   | CV    | Calc. Concentration (pg/ml) | Calc. Conc. Mean (pg/ml) | Calc. Conc. CV |
|----------|------|--------|--------|-------|-----------------------------|--------------------------|----------------|
|          | B05  | 77114  |        |       | 3804                        |                          |                |
| U010     | C05  | 182440 | 185317 | 2.2   | 7269                        | 7365                     | 1.85           |
|          | C06  | 188194 |        |       | 7461                        |                          |                |
| U011     | D05  | 191327 | 195948 | 3.34  | 7566                        | 7723                     | 2.87           |
|          | D06  | 200569 |        |       | 7879                        |                          |                |
| U012     | E06  | 181657 | 183948 | 1.76  | 7243                        | 7319                     | 1.48           |
|          | E05  | 186238 |        |       | 7395                        |                          |                |
| U013     | F06  | 164918 | 164345 | 0.494 | 6689                        | 6670                     | 0.399          |
|          | F05  | 163771 |        |       | 6652                        |                          |                |
| U014     | G06  | 170152 | 171023 | 0.72  | 6861                        | 6890                     | 0.589          |
|          | G05  | 171893 |        |       | 6919                        |                          |                |
| U015     | H06  | 117883 | 124027 | 7.01  | 5159                        | 5358                     | 5.27           |
|          | H05  | 130171 |        |       | 5558                        |                          |                |
| U016     | A08  | 141281 | 135989 | 5.5   | 5918                        | 5747                     | 4.23           |
|          | A07  | 130697 |        |       | 5575                        |                          |                |
| U017     | B07  | 131238 | 132565 | 1.42  | 5592                        | 5635                     | 1.08           |
|          | B08  | 133891 |        |       | 5678                        |                          |                |
| U018     | C07  | 30137  | 30285  | 0.689 | 2033                        | 2039                     | 0.446          |
|          | C08  | 30432  |        |       | 2045                        |                          |                |
| U019     | D07  | 103712 | 108990 | 6.85  | 4695                        | 4868                     | 5.02           |
|          | D08  | 114267 |        |       | 5041                        |                          |                |
| U020     | E07  | 86826  | 90571  | 5.85  | 4134                        | 4259                     | 4.16           |
|          | E08  | 94316  |        |       | 4385                        |                          |                |
| U021     | F08  | 179979 | 177168 | 2.24  | 7187                        | 7093                     | 1.86           |
|          | F07  | 174357 |        |       | 7000                        |                          |                |
| U022     | G07  | 73829  | 76845  | 5.55  | 3691                        | 3795                     | 3.86           |
|          | G08  | 79860  |        |       | 3898                        |                          |                |

Plate: Plate\_\*25D1OAU386G\*

Assay: Abeta 1-40

Group: Unknown

| Sample # | Well | Signal | Mean   | CV   | Calc. Concentration (pg/ml) | Calc. Conc. Mean (pg/ml) | Calc. Conc. CV |
|----------|------|--------|--------|------|-----------------------------|--------------------------|----------------|
| U023     | H07  | 32620  | 33487  | 3.66 | 2140                        | 2176                     | 2.38           |
|          | H08  | 34353  |        |      | 2213                        |                          |                |
| U024     | A09  | 104007 | 107843 | 5.03 | 4705                        | 4831                     | 3.68           |
|          | A10  | 111679 |        |      | 4956                        |                          |                |
| U025     | B10  | 65312  | 63472  | 4.1  | 3393                        | 3327                     | 2.79           |
|          | B09  | 61631  |        |      | 3262                        |                          |                |
| U026     | C10  | 50108  | 51003  | 2.48 | 2838                        | 2871                     | 1.66           |
|          | C09  | 51897  |        |      | 2905                        |                          |                |
| U027     | D10  | 196919 | 196475 | 0.32 | 7755                        | 7740                     | 0.275          |
|          | D09  | 196030 |        |      | 7725                        |                          |                |
| U028     | E10  | 101260 | 100510 | 1.06 | 4614                        | 4590                     | 0.763          |
|          | E09  | 99759  |        |      | 4565                        |                          |                |
| U029     | F10  | 134438 | 130143 | 4.67 | 5696                        | 5557                     | 3.55           |
|          | F09  | 125847 |        |      | 5417                        |                          |                |
| U030     | G10  | 107414 | 105865 | 2.07 | 4817                        | 4766                     | 1.51           |
|          | G09  | 104316 |        |      | 4715                        |                          |                |
| U031     | H10  | 14412  | 14165  | 2.47 | 1268                        | 1254                     | 1.56           |
|          | H09  | 13918  |        |      | 1240                        |                          |                |
| U032     | A11  | 201638 | 195235 | 4.64 | 7916                        | 7699                     | 3.98           |
|          | A12  | 188831 |        |      | 7482                        |                          |                |

**Blank Data Table**

Plate: Plate\_\*25D1OAU386G\*

Assay: Abeta 1-40

Group: Blank

| Sample * | Well | Signal | Mean | CV   |
|----------|------|--------|------|------|
| B001     | H01  | 66     | 68   | 4.16 |
|          | H02  | 70     |      |      |

**Control Data Table**

Plate: Plate\_\*25D10AU386G\*

Assay: Abeta 1-40

Group: Control

| Sample # | Well | Concentration (pg/ml) | Signal | Mean   | CV   | % Recovery | % Recovery Mean | Calc. Concentration (pg/ml) | Calc. Conc. Mean (pg/ml) | Calc. Conc. CV |
|----------|------|-----------------------|--------|--------|------|------------|-----------------|-----------------------------|--------------------------|----------------|
| STD 2    | C11  | 3829                  | 174240 | 169750 | 3.74 | 91.4       | 89.4            | 3498                        | 3424                     | 3.06           |
|          | C12  |                       | 165260 |        |      | 87.5       |                 | 3350                        |                          |                |
| STD 3    | D11  | 957                   | 30128  | 28763  | 6.71 | 106        | 103             | 1016                        | 986                      | 4.34           |
|          | D12  |                       | 27398  |        |      | 99.8       |                 | 956                         |                          |                |
| STD 4    | E12  | 239                   | 3136   | 3278   | 6.11 | 101        | 104             | 242                         | 248                      | 3.88           |
|          | E11  |                       | 3419   |        |      | 107        |                 | 255                         |                          |                |
| STD 5    | F11  | 59.8                  | 366    | 363    | 1.37 | 94.2       | 93.5            | 56.4                        | 56                       | 1.06           |
|          | F12  |                       | 359    |        |      | 92.8       |                 | 55.5                        |                          |                |

Plot: Standard 40

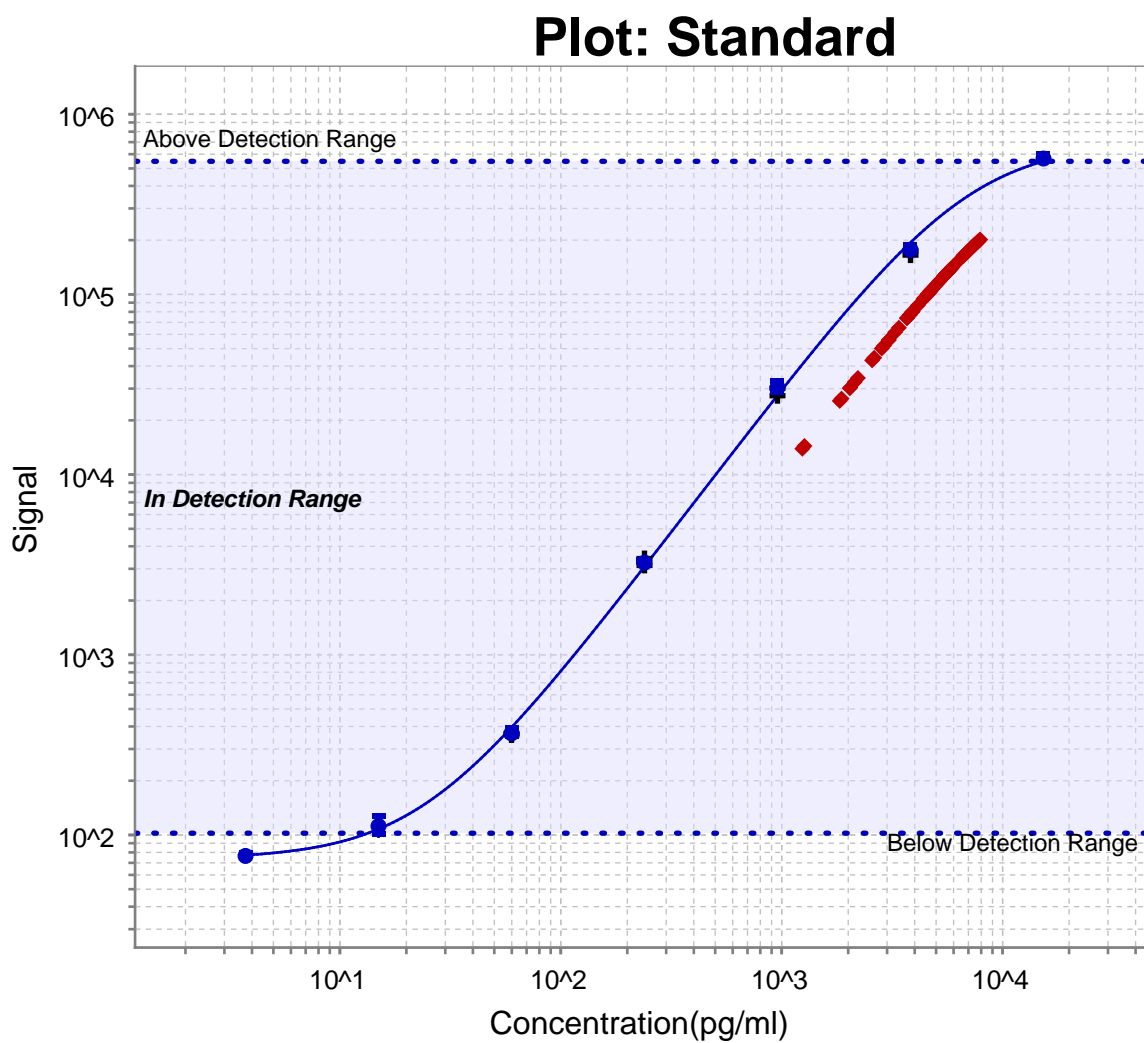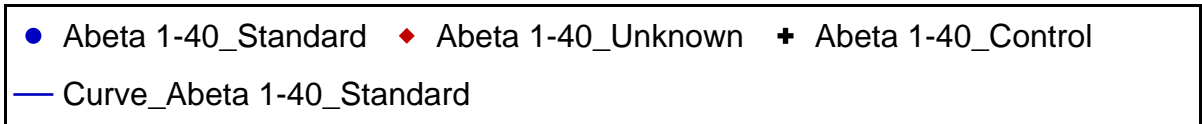

## Standard Data Table

Plate: Plate\_\*25D1OAU386G\*

Assay: Abeta 1-42

Group: Standard

| Sample # | Well | Concentration (pg/ml) | Signal | Mean   | CV    | Calc. Concentration (pg/ml) | Calc. Conc. Mean (pg/ml) | Calc. Conc. CV |
|----------|------|-----------------------|--------|--------|-------|-----------------------------|--------------------------|----------------|
| S001     | A01  | 1379                  | 671569 | 668555 | 0.638 | 1376                        | 1369                     | 0.766          |
|          | A02  |                       | 665540 |        |       | 1362                        |                          |                |
| S002     | B02  | 345                   | 153397 | 154199 | 0.736 | 349                         | 351                      | 0.588          |
|          | B01  |                       | 155001 |        |       | 352                         |                          |                |
| S003     | C02  | 86.2                  | 26088  | 25692  | 2.18  | 91                          | 90                       | 1.61           |
|          | C01  |                       | 25296  |        |       | 89                          |                          |                |
| S004     | D02  | 21.5                  | 3327   | 3342   | 0.614 | 19.9                        | 20                       | 0.458          |
|          | D01  |                       | 3356   |        |       | 20                          |                          |                |
| S005     | E01  | 5.39                  | 625    | 627    | 0.339 | 5.43                        | 5.44                     | 0.283          |
|          | E02  |                       | 628    |        |       | 5.45                        |                          |                |
| S006     | F01  | 1.35                  | 168    | 181    | 10.2  | 1.42                        | 1.57                     | 13.6           |
|          | F02  |                       | 194    |        |       | 1.72                        |                          |                |
| S007     | G01  | 0.337                 | 90     | 90     | 0     | 0.237                       | 0.237                    | 0              |
|          | G02  |                       | 90     |        |       | 0.237                       |                          |                |

## Standard Analysis Properties

| Name                       | Value                                             |
|----------------------------|---------------------------------------------------|
| Algorithm Parameters       |                                                   |
| Initial Top                | 675240                                            |
| Initial Bottom             | 81                                                |
| Initial MidPoint           | 707                                               |
| Initial HillSlope          | 1                                                 |
| Weighting                  | 1/y^2                                             |
| Max Iteration              | 500                                               |
| Fit Statistics             |                                                   |
| RSquared                   | 1                                                 |
| Calculated Parameters      |                                                   |
| Top                        | 1687917                                           |
| Bottom                     | 82.8                                              |
| MidPoint                   | 1859                                              |
| HillSlope                  | 1.38                                              |
| Detection Range Parameters |                                                   |
| Low                        | 0.77                                              |
| High                       | 1379                                              |
| Equation                   |                                                   |
| FourPL                     | $y = b_2 + \frac{b_1 - b_2}{1 + (x / b_3)^{b_4}}$ |



## Unknown Data Table

Plate: Plate\_\*25D1OAU386G\*

Assay: Abeta 1-42

Group: Unknown

| Sample #   | Well | Signal | Mean   | CV    | Calc. Concentration (pg/ml) | Calc. Conc. Mean (pg/ml) | Calc. Conc. CV |
|------------|------|--------|--------|-------|-----------------------------|--------------------------|----------------|
| Control 1  | A04  | 64728  | 64355  | 0.82  | 359                         | 357                      | 0.619          |
|            | A03  | 63982  |        |       | 355                         |                          |                |
| Control 2  | H12  | 46376  | 48692  | 6.73  | 279                         | 289                      | 5.04           |
|            | H11  | 51008  |        |       | 300                         |                          |                |
| NAD1 Alpha | G12  | 50959  | 52182  | 3.31  | 299                         | 305                      | 2.49           |
|            | G11  | 53404  |        |       | 310                         |                          |                |
| NCT1 Alpha | B12  | 67944  | 69244  | 2.66  | 372                         | 377                      | 2.01           |
|            | B11  | 70544  |        |       | 383                         |                          |                |
| U001       | B03  | 114123 | 114726 | 0.743 | 554                         | 556                      | 0.579          |
|            | B04  | 115328 |        |       | 558                         |                          |                |
| U002       | C04  | 12336  | 12349  | 0.143 | 105                         | 105                      | 0.105          |
|            | C03  | 12361  |        |       | 105                         |                          |                |
| U003       | D03  | 90774  | 92057  | 1.97  | 464                         | 469                      | 1.51           |
|            | D04  | 93339  |        |       | 474                         |                          |                |
| U004       | E04  | 105027 | 102718 | 3.18  | 519                         | 510                      | 2.46           |
|            | E03  | 100409 |        |       | 501                         |                          |                |
| U005       | F04  | 56680  | 52742  | 10.6  | 324                         | 307                      | 7.93           |
|            | F03  | 48804  |        |       | 290                         |                          |                |
| U006       | G03  | 9641   | 9618   | 0.346 | 87.4                        | 87.3                     | 0.254          |
|            | G04  | 9594   |        |       | 87.1                        |                          |                |
| U007       | H04  | 7899   | 7823   | 1.38  | 75.5                        | 74.9                     | 1.02           |
|            | H03  | 7746   |        |       | 74.4                        |                          |                |
| U008       | A05  | 123339 | 122809 | 0.61  | 588                         | 586                      | 0.478          |
|            | A06  | 122279 |        |       | 584                         |                          |                |
| U009       | B05  | 14991  | 14956  | 0.336 | 121                         | 121                      | 0.247          |

Plate: Plate\_\*25D1OAU386G\*

Assay: Abeta 1-42

Group: Unknown

| Sample # | Well | Signal | Mean   | CV    | Calc. Concentration (pg/ml) | Calc. Conc. Mean (pg/ml) | Calc. Conc. CV |
|----------|------|--------|--------|-------|-----------------------------|--------------------------|----------------|
|          | B06  | 14920  |        |       | 121                         |                          |                |
| U010     | C06  | 70748  | 68916  | 3.76  | 383                         | 376                      | 2.85           |
|          | C05  | 67084  |        |       | 368                         |                          |                |
| U011     | D06  | 71529  | 70427  | 2.21  | 387                         | 382                      | 1.68           |
|          | D05  | 69325  |        |       | 378                         |                          |                |
| U012     | E06  | 68227  | 69038  | 1.66  | 373                         | 376                      | 1.26           |
|          | E05  | 69848  |        |       | 380                         |                          |                |
| U013     | F05  | 39270  | 38682  | 2.15  | 247                         | 244                      | 1.6            |
|          | F06  | 38093  |        |       | 241                         |                          |                |
| U014     | G06  | 48247  | 48646  | 1.16  | 287                         | 289                      | 0.868          |
|          | G05  | 49045  |        |       | 291                         |                          |                |
| U015     | H06  | 24078  | 24622  | 3.12  | 172                         | 174                      | 2.31           |
|          | H05  | 25165  |        |       | 177                         |                          |                |
| U016     | A07  | 27597  | 28178  | 2.92  | 190                         | 193                      | 2.16           |
|          | A08  | 28759  |        |       | 196                         |                          |                |
| U017     | B08  | 116354 | 115992 | 0.442 | 562                         | 561                      | 0.345          |
|          | B07  | 115629 |        |       | 559                         |                          |                |
| U018     | C08  | 5513   | 5422   | 2.39  | 57.9                        | 57.2                     | 1.76           |
|          | C07  | 5330   |        |       | 56.5                        |                          |                |
| U019     | D07  | 73760  | 73843  | 0.158 | 396                         | 396                      | 0.12           |
|          | D08  | 73925  |        |       | 396                         |                          |                |
| U020     | E08  | 47652  | 46506  | 3.49  | 285                         | 280                      | 2.61           |
|          | E07  | 45359  |        |       | 275                         |                          |                |
| U021     | F08  | 54073  | 53513  | 1.48  | 313                         | 311                      | 1.11           |
|          | F07  | 52953  |        |       | 308                         |                          |                |
| U022     | G07  | 37813  | 38834  | 3.72  | 240                         | 244                      | 2.77           |
|          | G08  | 39855  |        |       | 249                         |                          |                |

Plate: Plate\_\*25D1OAU386G\*

Assay: Abeta 1-42

Group: Unknown

| Sample # | Well | Signal | Mean  | CV    | Calc. Concentration (pg/ml) | Calc. Conc. Mean (pg/ml) | Calc. Conc. CV |
|----------|------|--------|-------|-------|-----------------------------|--------------------------|----------------|
| U023     | H08  | 16438  | 16550 | 0.953 | 129                         | 130                      | 0.702          |
|          | H07  | 16661  |       |       | 131                         |                          |                |
| U024     | A10  | 21038  | 21909 | 5.62  | 155                         | 160                      | 4.15           |
|          | A09  | 22779  |       |       | 165                         |                          |                |
| U025     | B10  | 28502  | 29143 | 3.11  | 194                         | 198                      | 2.3            |
|          | B09  | 29784  |       |       | 201                         |                          |                |
| U026     | C09  | 24347  | 24210 | 0.8   | 173                         | 172                      | 0.591          |
|          | C10  | 24073  |       |       | 172                         |                          |                |
| U027     | D10  | 58553  | 58627 | 0.177 | 332                         | 333                      | 0.133          |
|          | D09  | 58700  |       |       | 333                         |                          |                |
| U028     | E10  | 87330  | 88299 | 1.55  | 450                         | 454                      | 1.19           |
|          | E09  | 89268  |       |       | 458                         |                          |                |
| U029     | F09  | 99159  | 99513 | 0.502 | 496                         | 498                      | 0.388          |
|          | F10  | 99866  |       |       | 499                         |                          |                |
| U030     | G09  | 60862  | 60914 | 0.12  | 342                         | 342                      | 0.09           |
|          | G10  | 60965  |       |       | 343                         |                          |                |
| U031     | H10  | 6910   | 6817  | 1.93  | 68.4                        | 67.7                     | 1.42           |
|          | H09  | 6724   |       |       | 67                          |                          |                |
| U032     | A11  | 53359  | 51281 | 5.73  | 310                         | 301                      | 4.3            |
|          | A12  | 49202  |       |       | 292                         |                          |                |

**Blank Data Table**

Plate: Plate\_\*25D1OAU386G\*

Assay: Abeta 1-42

Group: Blank

| Sample * | Well | Signal | Mean | CV   |
|----------|------|--------|------|------|
| B001     | H01  | 58     | 63   | 11.2 |
|          | H02  | 68     |      |      |

**Control Data Table**

Plate: Plate\_\*25D10AU386G\*

Assay: Abeta 1-42

Group: Control

| Sample # | Well | Concentration (pg/ml) | Signal | Mean   | CV   | % Recovery | % Recovery Mean | Calc. Concentration (pg/ml) | Calc. Conc. Mean (pg/ml) | Calc. Conc. CV |
|----------|------|-----------------------|--------|--------|------|------------|-----------------|-----------------------------|--------------------------|----------------|
| STD 2    | C11  | 345                   | 140254 | 135840 | 4.6  | 94.4       | 92              | 325                         | 317                      | 3.63           |
|          | C12  |                       | 131426 |        |      | 89.7       |                 | 309                         |                          |                |
| STD 3    | D12  | 86.2                  | 19949  | 20986  | 6.99 | 86.6       | 89.9            | 74.7                        | 77.5                     | 5.16           |
|          | D11  |                       | 22023  |        |      | 93.2       |                 | 80.3                        |                          |                |
| STD 4    | E11  | 21.5                  | 3010   | 2985   | 1.21 | 85.7       | 85.2            | 18.5                        | 18.3                     | 0.903          |
|          | E12  |                       | 2959   |        |      | 84.6       |                 | 18.2                        |                          |                |
| STD 5    | F12  | 5.39                  | 531    | 548    | 4.39 | 87.7       | 90.1            | 4.73                        | 4.85                     | 3.75           |
|          | F11  |                       | 565    |        |      | 92.5       |                 | 4.98                        |                          |                |

Plot: Standard 42

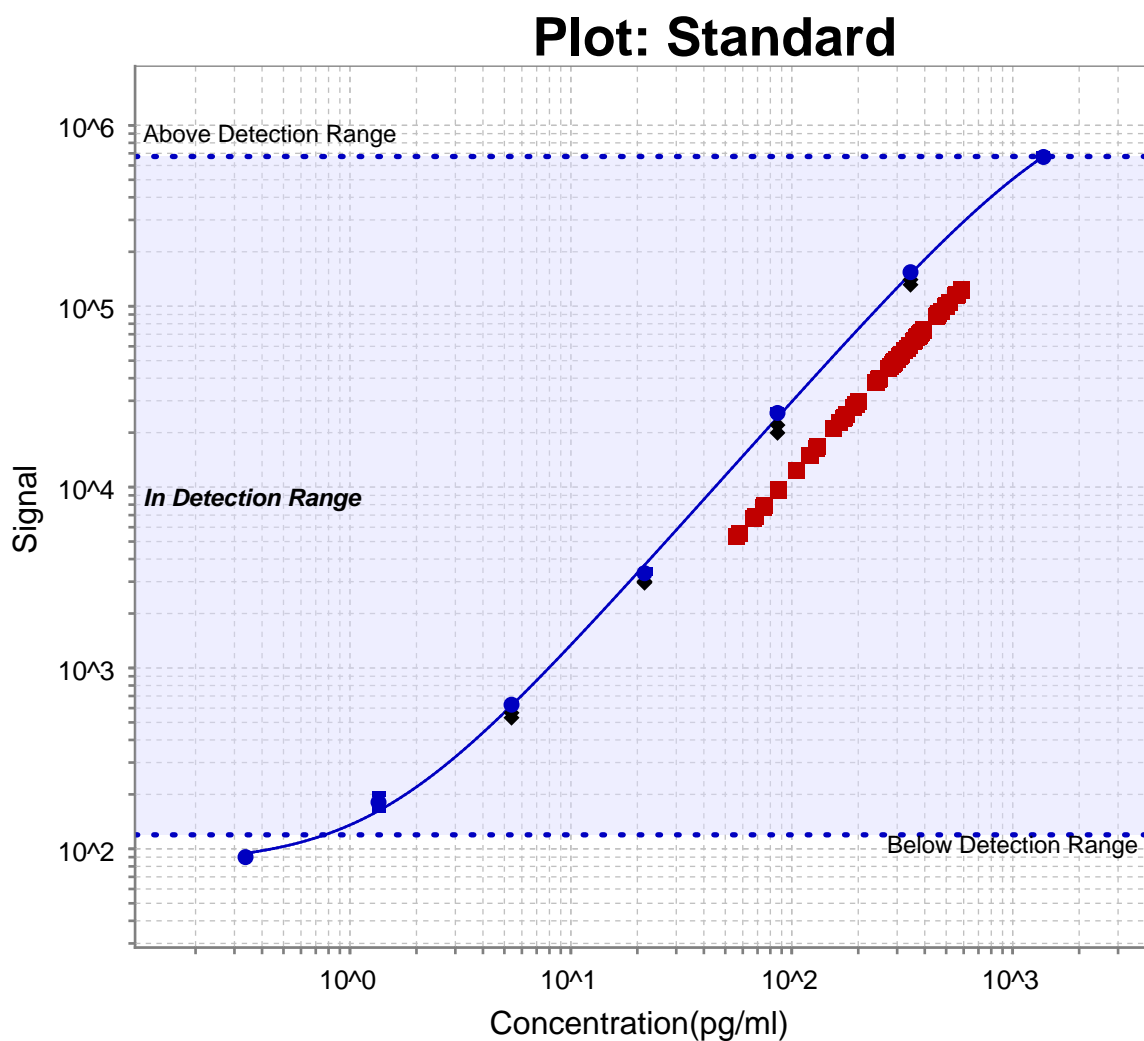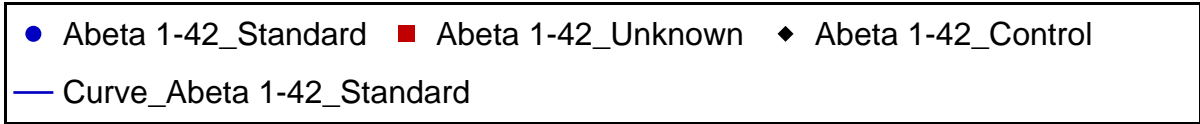

Supplement: alzrt236-S10.pdf [file alzrt236-S10.pdf]
