# Supplementary material for: Amyloid-beta 42 adsorption following serial tube transfer
Source: PubMed Central journal article supplement (PMC4059346; doi:10.1186/alzrt236), 2014-01-28

## **Report Properties**

Title: Experiment\_20131108145615

Author: Administrator

Creator: Administrator

Report Date: 08-Nov-2013

## **Notes**

**Plate Properties**

| Name           | Value                   |
|----------------|-------------------------|
| User           | Administrator           |
| Read Time      | 11/08/2013 14:53:00 GMT |
| Det Param      | Standard                |
| Type           | 96 Multi-Spot 4         |
| Wells Per Row  | 12                      |
| Wells Per Col  | 8                       |
| Spots Per Well | 4                       |
| Stack ID       | 0                       |
| Barcode1       | *25D1OAS391A*           |
| Barcode2       | N/A                     |
| Barcode3       | N/A                     |
| Plate #        | 1290                    |
| Model          | IPR                     |
| Serial #       | 1200120302692           |
| Version        | MSD_3_0_18              |
| Orient         | 0                       |
| Comments       |                         |

**20131106\_WTBioM07.2\_AbTRIPLEX - Assay Assignment**

Spot : &lt;a1&gt; &lt;a2&gt;

Legend : &lt;b1&gt; &lt;b2&gt;

| Assay Assignment |            |
|------------------|------------|
| Spot ID          | Assay Name |
| 1                | Abeta 1-40 |
| 2                | Abeta 1-38 |
| 3                |            |
| 4                | Abeta 1-42 |

**20131106\_WTBioM07.2\_AbTRIPLEX - Group Association**

| Group Association |            |                |       |
|-------------------|------------|----------------|-------|
| Assay Name        | Group Name | Back Fit Curve | Blank |
| Abeta 1-38        | Unknown    | Standard       |       |

| Group Association |            |                |       |
|-------------------|------------|----------------|-------|
| Assay Name        | Group Name | Back Fit Curve | Blank |
| Abeta 1-40        | Unknown    | Standard       |       |
| Abeta 1-42        | Unknown    | Standard       |       |
| Abeta 1-38        | Standard   | -              |       |
| Abeta 1-40        | Standard   | -              |       |
| Abeta 1-42        | Standard   | -              |       |
| Abeta 1-38        | Control    | Standard       |       |
| Abeta 1-40        | Control    | Standard       |       |
| Abeta 1-42        | Control    | Standard       |       |

## 20131106\_WTBioM07.2\_AbTRIPLEX - Sample Definition

|          | 1                    | 2                    | 3                           | 4                           | 5                   | 6                   | 7                   | 8                   | 9                   | 10                  | 11                           | 12                           |
|----------|----------------------|----------------------|-----------------------------|-----------------------------|---------------------|---------------------|---------------------|---------------------|---------------------|---------------------|------------------------------|------------------------------|
| <b>A</b> | S001<br>Standar<br>d | S001<br>Standar<br>d | Control<br>1<br>Unkno<br>wn | Control<br>1<br>Unkno<br>wn | U008<br>Unkno<br>wn | U008<br>Unkno<br>wn | U016<br>Unkno<br>wn | U016<br>Unkno<br>wn | U024<br>Unkno<br>wn | U024<br>Unkno<br>wn | U032<br>Unkno<br>wn          | U032<br>Unkno<br>wn          |
| <b>B</b> | S002<br>Standar<br>d | S002<br>Standar<br>d | U001<br>Unkno<br>wn         | U001<br>Unkno<br>wn         | U009<br>Unkno<br>wn | U009<br>Unkno<br>wn | U017<br>Unkno<br>wn | U017<br>Unkno<br>wn | U025<br>Unkno<br>wn | U025<br>Unkno<br>wn | NCT1<br>Alpha<br>Unkno<br>wn | NCT1<br>Alpha<br>Unkno<br>wn |
| <b>C</b> | S003<br>Standar<br>d | S003<br>Standar<br>d | U002<br>Unkno<br>wn         | U002<br>Unkno<br>wn         | U010<br>Unkno<br>wn | U010<br>Unkno<br>wn | U018<br>Unkno<br>wn | U018<br>Unkno<br>wn | U026<br>Unkno<br>wn | U026<br>Unkno<br>wn | STD 2<br>Control             | STD 2<br>Control             |
| <b>D</b> | S004<br>Standar<br>d | S004<br>Standar<br>d | U003<br>Unkno<br>wn         | U003<br>Unkno<br>wn         | U011<br>Unkno<br>wn | U011<br>Unkno<br>wn | U019<br>Unkno<br>wn | U019<br>Unkno<br>wn | U027<br>Unkno<br>wn | U027<br>Unkno<br>wn | STD 3<br>Control             | STD 3<br>Control             |
| <b>E</b> | S005<br>Standar<br>d | S005<br>Standar<br>d | U004<br>Unkno<br>wn         | U004<br>Unkno<br>wn         | U012<br>Unkno<br>wn | U012<br>Unkno<br>wn | U020<br>Unkno<br>wn | U020<br>Unkno<br>wn | U028<br>Unkno<br>wn | U028<br>Unkno<br>wn | STD 4<br>Control             | STD 4<br>Control             |
| <b>F</b> | S006<br>Standar<br>d | S006<br>Standar<br>d | U005<br>Unkno<br>wn         | U005<br>Unkno<br>wn         | U013<br>Unkno<br>wn | U013<br>Unkno<br>wn | U021<br>Unkno<br>wn | U021<br>Unkno<br>wn | U029<br>Unkno<br>wn | U029<br>Unkno<br>wn | STD 5<br>Control             | STD 5<br>Control             |
| <b>G</b> | S007<br>Standar<br>d | S007<br>Standar<br>d | U006<br>Unkno<br>wn         | U006<br>Unkno<br>wn         | U014<br>Unkno<br>wn | U014<br>Unkno<br>wn | U022<br>Unkno<br>wn | U022<br>Unkno<br>wn | U030<br>Unkno<br>wn | U030<br>Unkno<br>wn | NAD1<br>Alpha<br>Unkno<br>wn | NAD1<br>Alpha<br>Unkno<br>wn |
| <b>H</b> | B001<br>Blank        | B001<br>Blank        | U007<br>Unkno<br>wn         | U007<br>Unkno<br>wn         | U015<br>Unkno<br>wn | U015<br>Unkno<br>wn | U023<br>Unkno<br>wn | U023<br>Unkno<br>wn | U031<br>Unkno<br>wn | U031<br>Unkno<br>wn | Control<br>2<br>Unkno<br>wn  | Control<br>2<br>Unkno<br>wn  |

**20131106\_WTBioM07.2\_AbTRIPLEX - Abeta 1-40's  
Concentration/Dilution Definition**

|   | 1     | 2     | 3 | 4 | 5 | 6 | 7 | 8 | 9 | 10 | 11   | 12   |
|---|-------|-------|---|---|---|---|---|---|---|----|------|------|
| A | 15316 | 15316 | 2 | 2 | 2 | 2 | 2 | 2 | 2 | 2  | 2    | 2    |
| B | 3829  | 3829  | 2 | 2 | 2 | 2 | 2 | 2 | 2 | 2  | 2    | 2    |
| C | 957   | 957   | 2 | 2 | 2 | 2 | 2 | 2 | 2 | 2  | 3829 | 3829 |
| D | 239   | 239   | 2 | 2 | 2 | 2 | 2 | 2 | 2 | 2  | 957  | 957  |
| E | 59.8  | 59.8  | 2 | 2 | 2 | 2 | 2 | 2 | 2 | 2  | 239  | 239  |
| F | 15    | 15    | 2 | 2 | 2 | 2 | 2 | 2 | 2 | 2  | 59.8 | 59.8 |
| G | 3.74  | 3.74  | 2 | 2 | 2 | 2 | 2 | 2 | 2 | 2  | 2    | 2    |
| H |       |       | 2 | 2 | 2 | 2 | 2 | 2 | 2 | 2  | 2    | 2    |

**20131106\_WTBioM07.2\_AbTRIPLEX - Abeta 1-38's  
Concentration/Dilution Definition**

|   | 1     | 2     | 3 | 4 | 5 | 6 | 7 | 8 | 9 | 10 | 11   | 12   |
|---|-------|-------|---|---|---|---|---|---|---|----|------|------|
| A | 10763 | 10763 | 2 | 2 | 2 | 2 | 2 | 2 | 2 | 2  | 2    | 2    |
| B | 2691  | 2691  | 2 | 2 | 2 | 2 | 2 | 2 | 2 | 2  | 2    | 2    |
| C | 673   | 673   | 2 | 2 | 2 | 2 | 2 | 2 | 2 | 2  | 2691 | 2691 |
| D | 168   | 168   | 2 | 2 | 2 | 2 | 2 | 2 | 2 | 2  | 673  | 673  |
| E | 42    | 42    | 2 | 2 | 2 | 2 | 2 | 2 | 2 | 2  | 168  | 168  |
| F | 10.5  | 10.5  | 2 | 2 | 2 | 2 | 2 | 2 | 2 | 2  | 42   | 42   |
| G | 2.63  | 2.63  | 2 | 2 | 2 | 2 | 2 | 2 | 2 | 2  | 2    | 2    |
| H |       |       | 2 | 2 | 2 | 2 | 2 | 2 | 2 | 2  | 2    | 2    |

**20131106\_WTBioM07.2\_AbTRIPLEX - Abeta 1-42's  
Concentration/Dilution Definition**

|   | 1     | 2     | 3 | 4 | 5 | 6 | 7 | 8 | 9 | 10 | 11   | 12   |
|---|-------|-------|---|---|---|---|---|---|---|----|------|------|
| A | 1379  | 1379  | 2 | 2 | 2 | 2 | 2 | 2 | 2 | 2  | 2    | 2    |
| B | 345   | 345   | 2 | 2 | 2 | 2 | 2 | 2 | 2 | 2  | 2    | 2    |
| C | 86.2  | 86.2  | 2 | 2 | 2 | 2 | 2 | 2 | 2 | 2  | 345  | 345  |
| D | 21.5  | 21.5  | 2 | 2 | 2 | 2 | 2 | 2 | 2 | 2  | 86.2 | 86.2 |
| E | 5.39  | 5.39  | 2 | 2 | 2 | 2 | 2 | 2 | 2 | 2  | 21.5 | 21.5 |
| F | 1.35  | 1.35  | 2 | 2 | 2 | 2 | 2 | 2 | 2 | 2  | 5.39 | 5.39 |
| G | 0.337 | 0.337 | 2 | 2 | 2 | 2 | 2 | 2 | 2 | 2  | 2    | 2    |
| H |       |       | 2 | 2 | 2 | 2 | 2 | 2 | 2 | 2  | 2    | 2    |

## Plate Data Table

Plate: Plate\_\*25D1OAS391A\*

| Sample *   | Assay      | Well | Dilution | Concentration (pg/ml) | Signal | Mean  | CV    | Calc. Concentration (pg/ml) | Calc. Conc. Mean (pg/ml) | Calc. Conc. CV |
|------------|------------|------|----------|-----------------------|--------|-------|-------|-----------------------------|--------------------------|----------------|
| B001       | Abeta 1-38 | H02  | N/A      | N/A                   | 76     | 72    | 8.9   | N/A                         | N/A                      | N/A            |
|            |            | H01  |          |                       | 67     |       |       | N/A                         |                          |                |
|            | Abeta 1-40 | H01  | N/A      | N/A                   | 66     | 64    | 4.42  | N/A                         | N/A                      | N/A            |
|            |            | H02  |          |                       | 62     |       |       | N/A                         |                          |                |
|            | Abeta 1-42 | H01  | N/A      | N/A                   | 69     | 67    | 5.32  | N/A                         | N/A                      | N/A            |
|            |            | H02  |          |                       | 64     |       |       | N/A                         |                          |                |
| Control 1  | Abeta 1-38 | A03  | 2        | N/A                   | 13791  | 13970 | 1.81  | 1641                        | 1654                     | 1.06           |
|            |            | A04  |          |                       | 14148  |       |       | 1666                        |                          |                |
|            | Abeta 1-40 | A04  | 2        | N/A                   | 96693  | 95643 | 1.55  | 4054                        | 4022                     | 1.11           |
|            |            | A03  |          |                       | 94593  |       |       | 3990                        |                          |                |
|            | Abeta 1-42 | A04  | 2        | N/A                   | 62878  | 63224 | 0.774 | 345                         | 346                      | 0.575          |
|            |            | A03  |          |                       | 63570  |       |       | 347                         |                          |                |
| Control 2  | Abeta 1-38 | H11  | 2        | N/A                   | 13714  | 12791 | 10.2  | 1636                        | 1570                     | 5.99           |
|            |            | H12  |          |                       | 11867  |       |       | 1503                        |                          |                |
|            | Abeta 1-40 | H11  | 2        | N/A                   | 85455  | 82481 | 5.1   | 3712                        | 3621                     | 3.58           |
|            |            | H12  |          |                       | 79507  |       |       | 3529                        |                          |                |
|            | Abeta 1-42 | H12  | 2        | N/A                   | 46698  | 47601 | 2.68  | 277                         | 281                      | 1.97           |
|            |            | H11  |          |                       | 48503  |       |       | 284                         |                          |                |
| NAD1 Alpha | Abeta 1-38 | G11  | 2        | N/A                   | 40527  | 39501 | 3.68  | 3093                        | 3046                     | 2.17           |
|            |            | G12  |          |                       | 38474  |       |       | 3000                        |                          |                |
|            | Abeta 1-40 | G11  | 2        | N/A                   | 16508  | 16271 | 2.06  | 6097                        | 6025                     | 1.68           |
|            |            | G12  |          |                       | 16034  |       |       | 5954                        |                          |                |
|            | Abeta 1-42 | G12  | 2        | N/A                   | 49677  | 51549 | 5.13  | 290                         | 297                      | 3.79           |
|            |            | G11  |          |                       | 53420  |       |       | 305                         |                          |                |

Plate: Plate\_\*25D1OAS391A\*

| Sample *   | Assay      | Well | Dilution | Concentration (pg/ml) | Signal | Mean  | CV    | Calc. Concentration (pg/ml) | Calc. Conc. Mean (pg/ml) | Calc. Conc. CV |
|------------|------------|------|----------|-----------------------|--------|-------|-------|-----------------------------|--------------------------|----------------|
| NCT1 Alpha | Abeta 1-38 | B11  | 2        | N/A                   | 17160  | 16584 | 4.92  | 1866                        | 1829                     | 2.88           |
|            |            | B12  |          |                       | 16007  |       |       | 1791                        |                          |                |
|            | Abeta 1-40 | B11  | 2        | N/A                   | 10808  | 10365 | 6.05  | 4396                        | 4263                     | 4.41           |
|            |            | B12  |          |                       | 99221  |       |       | 4130                        |                          |                |
|            | Abeta 1-42 | B12  | 2        | N/A                   | 72485  | 73965 | 2.83  | 383                         | 389                      | 2.12           |
|            |            | B11  |          |                       | 75444  |       |       | 395                         |                          |                |
| S001       | Abeta 1-38 | A01  | N/A      | 10763                 | 73685  | 73011 | 1.31  | 10737                       | 10647                    | 1.2            |
|            |            | A02  |          |                       | 72337  |       |       | 10557                       |                          |                |
|            | Abeta 1-40 | A02  | N/A      | 15316                 | 56167  | 55913 | 0.641 | 18020                       | 17678                    | 2.73           |
|            |            | A01  |          |                       | 55660  |       |       | 17336                       |                          |                |
|            | Abeta 1-42 | A01  | N/A      | 1379                  | 68059  | 67751 | 0.644 | 1370                        | 1363                     | 0.808          |
|            |            | A02  |          |                       | 67442  |       |       | 1355                        |                          |                |
| S002       | Abeta 1-38 | B02  | N/A      | 2691                  | 11706  | 11442 | 3.26  | 2926                        | 2885                     | 2              |
|            |            | B01  |          |                       | 11179  |       |       | 2844                        |                          |                |
|            | Abeta 1-40 | B01  | N/A      | 3829                  | 19569  | 19700 | 0.938 | 3520                        | 3541                     | 0.822          |
|            |            | B02  |          |                       | 19831  |       |       | 3562                        |                          |                |
|            | Abeta 1-42 | B02  | N/A      | 345                   | 16316  | 16176 | 1.22  | 357                         | 355                      | 0.972          |
|            |            | B01  |          |                       | 16036  |       |       | 352                         |                          |                |

Plate: Plate\_\*25D1OAS391A\*

| Sample * | Assay      | Well | Dilution | Concentration (pg/ml) | Signal | Mean  | CV    | Calc. Concentration (pg/ml) | Calc. Conc. Mean (pg/ml) | Calc. Conc. CV |
|----------|------------|------|----------|-----------------------|--------|-------|-------|-----------------------------|--------------------------|----------------|
| S003     | Abeta 1-38 | C01  | N/A      | 673                   | 7503   | 9053  | 24.2  | 574                         | 639                      | 14.3           |
|          |            | C02  |          |                       | 10602  |       |       | 704                         |                          |                |
|          | Abeta 1-40 | C02  | N/A      | 957                   | 35950  | 34666 | 5.24  | 1037                        | 1013                     | 3.4            |
|          |            | C01  |          |                       | 33382  |       |       | 988                         |                          |                |
|          | Abeta 1-42 | C02  | N/A      | 86.2                  | 26781  | 26661 | 0.637 | 92.1                        | 91.8                     | 0.463          |
|          |            | C01  |          |                       | 26541  |       |       | 91.5                        |                          |                |
| S004     | Abeta 1-38 | D02  | N/A      | 168                   | 865    | 920   | 8.38  | 156                         | 162                      | 5.36           |
|          |            | D01  |          |                       | 974    |       |       | 168                         |                          |                |
|          | Abeta 1-40 | D02  | N/A      | 239                   | 3552   | 3655  | 3.97  | 240                         | 245                      | 2.5            |
|          |            | D01  |          |                       | 3757   |       |       | 249                         |                          |                |
|          | Abeta 1-42 | D02  | N/A      | 21.5                  | 3378   | 3087  | 13.3  | 20.5                        | 19.2                     | 9.8            |
|          |            | D01  |          |                       | 2796   |       |       | 17.9                        |                          |                |
| S005     | Abeta 1-38 | E02  | N/A      | 42                    | 204    | 198   | 4.65  | 52.2                        | 50.5                     | 4.79           |
|          |            | E01  |          |                       | 191    |       |       | 48.8                        |                          |                |
|          | Abeta 1-40 | E01  | N/A      | 59.8                  | 399    | 420   | 6.91  | 55.3                        | 57.5                     | 5.28           |
|          |            | E02  |          |                       | 440    |       |       | 59.6                        |                          |                |
|          | Abeta 1-42 | E01  | N/A      | 5.39                  | 621    | 635   | 3.01  | 5.62                        | 5.72                     | 2.48           |
|          |            | E02  |          |                       | 648    |       |       | 5.82                        |                          |                |
| S006     | Abeta 1-38 | F02  | N/A      | 10.5                  | 106    | 100   | 9.24  | 18.5                        | 14.2                     | 42.9           |
|          |            | F01  |          |                       | 93     |       |       | 9.91                        |                          |                |
|          | Abeta 1-40 | F01  | N/A      | 15                    | 118    | 121   | 2.93  | 14.5                        | 15.1                     | 5.71           |
|          |            | F02  |          |                       | 123    |       |       | 15.7                        |                          |                |
|          | Abeta 1-42 | F01  | N/A      | 1.35                  | 168    | 176   | 6.04  | 1.48                        | 1.58                     | 8.4            |
|          |            | F02  |          |                       | 183    |       |       | 1.67                        |                          |                |
| S007     | Abeta 1-38 | G01  | N/A      | 2.63                  | 71     | 79    | 14.3  | 0                           | 1.28                     | 141            |
|          |            | G02  |          |                       | 87     |       |       | 2.57                        |                          |                |
|          | Abeta 1-40 | G02  | N/A      | 3.74                  | 90     | 87    | 4.88  | 5.58                        | 3.83                     | 64.8           |



Plate: Plate\_\*25D1OAS391A\*

| Sample * | Assay      | Well | Dilution | Concentration (pg/ml) | Signal | Mean   | CV    | Calc. Concentration (pg/ml) | Calc. Conc. Mean (pg/ml) | Calc. Conc. CV |
|----------|------------|------|----------|-----------------------|--------|--------|-------|-----------------------------|--------------------------|----------------|
|          |            | G01  |          |                       | 84     |        |       | 2.07                        |                          |                |
|          | Abeta 1-42 | G01  | N/A      | 0.337                 | 89     | 91     | 2.34  | 0.156                       | 0.2                      | 30.7           |
|          |            | G02  |          |                       | 92     |        |       | 0.243                       |                          |                |
| STD 2    | Abeta 1-38 | C12  | N/A      | 2691                  | 90619  | 90891  | 0.423 | 2502                        | 2507                     | 0.257          |
|          |            | C11  |          |                       | 91163  |        |       | 2511                        |                          |                |
|          | Abeta 1-40 | C11  | N/A      | 3829                  | 184261 | 182922 | 1.04  | 3342                        | 3321                     | 0.881          |
|          |            | C12  |          |                       | 181582 |        |       | 3301                        |                          |                |
|          | Abeta 1-42 | C11  | N/A      | 345                   | 145395 | 144019 | 1.35  | 326                         | 324                      | 1.06           |
|          |            | C12  |          |                       | 142643 |        |       | 321                         |                          |                |
| STD 3    | Abeta 1-38 | D12  | N/A      | 673                   | 8853   | 8792   | 0.981 | 633                         | 630                      | 0.575          |
|          |            | D11  |          |                       | 8731   |        |       | 628                         |                          |                |
|          | Abeta 1-40 | D11  | N/A      | 957                   | 30329  | 30880  | 2.52  | 929                         | 940                      | 1.63           |
|          |            | D12  |          |                       | 31431  |        |       | 951                         |                          |                |
|          | Abeta 1-42 | D12  | N/A      | 86.2                  | 21889  | 20159  | 12.1  | 79.6                        | 74.9                     | 8.8            |
|          |            | D11  |          |                       | 18429  |        |       | 70.3                        |                          |                |
| STD 4    | Abeta 1-38 | E11  | N/A      | 168                   | 944    | 912    | 4.96  | 165                         | 161                      | 3.17           |
|          |            | E12  |          |                       | 880    |        |       | 157                         |                          |                |
|          | Abeta 1-40 | E12  | N/A      | 239                   | 3576   | 3563   | 0.516 | 241                         | 241                      | 0.325          |
|          |            | E11  |          |                       | 3550   |        |       | 240                         |                          |                |
|          | Abeta 1-42 | E11  | N/A      | 21.5                  | 3154   | 3033   | 5.67  | 19.5                        | 19                       | 4.16           |
|          |            | E12  |          |                       | 2911   |        |       | 18.4                        |                          |                |
| STD 5    | Abeta 1-38 | F12  | N/A      | 42                    | 195    | 193    | 1.84  | 49.9                        | 49.2                     | 1.93           |
|          |            | F11  |          |                       | 190    |        |       | 48.5                        |                          |                |
|          | Abeta 1-40 | F11  | N/A      | 59.8                  | 416    | 412    | 1.37  | 57.1                        | 56.7                     | 1.05           |

Plate: Plate\_\*25D1OAS391A\*

| Sample * | Assay      | Well | Dilution | Concentration (pg/ml) | Signal | Mean   | CV    | Calc. Concentration (pg/ml) | Calc. Conc. Mean (pg/ml) | Calc. Conc. CV |
|----------|------------|------|----------|-----------------------|--------|--------|-------|-----------------------------|--------------------------|----------------|
|          |            | F12  |          |                       | 408    |        |       | 56.3                        |                          |                |
|          | Abeta 1-42 | F12  | N/A      | 5.39                  | 539    | 540    | 0.262 | 5                           | 5                        | 0.222          |
|          |            | F11  |          |                       | 541    |        |       | 5.01                        |                          |                |
| U001     | Abeta 1-38 | B03  | 2        | N/A                   | 11978  | 12617  | 7.16  | 1511                        | 1558                     | 4.2            |
|          |            | B04  |          |                       | 13256  |        |       | 1604                        |                          |                |
|          | Abeta 1-40 | B03  | 2        | N/A                   | 63327  | 65952  | 5.63  | 3018                        | 3102                     | 3.84           |
|          |            | B04  |          |                       | 68576  |        |       | 3186                        |                          |                |
|          | Abeta 1-42 | B03  | 2        | N/A                   | 12323  | 12469  | 1.66  | 105                         | 106                      | 1.2            |
|          |            | B04  |          |                       | 12615  |        |       | 107                         |                          |                |
| U002     | Abeta 1-38 | C03  | 2        | N/A                   | 37901  | 38025  | 0.461 | 2973                        | 2979                     | 0.273          |
|          |            | C04  |          |                       | 38149  |        |       | 2985                        |                          |                |
|          | Abeta 1-40 | C03  | 2        | N/A                   | 147579 | 151153 | 3.34  | 5571                        | 5678                     | 2.67           |
|          |            | C04  |          |                       | 154726 |        |       | 5785                        |                          |                |
|          | Abeta 1-42 | C04  | 2        | N/A                   | 33763  | 34107  | 1.42  | 218                         | 220                      | 1.04           |
|          |            | C03  |          |                       | 34450  |        |       | 221                         |                          |                |
| U003     | Abeta 1-38 | D04  | 2        | N/A                   | 18124  | 17997  | 1     | 1927                        | 1919                     | 0.587          |
|          |            | D03  |          |                       | 17869  |        |       | 1911                        |                          |                |
|          | Abeta 1-40 | D04  | 2        | N/A                   | 88332  | 86344  | 3.26  | 3800                        | 3740                     | 2.3            |
|          |            | D03  |          |                       | 84356  |        |       | 3679                        |                          |                |
|          | Abeta 1-42 | D03  | 2        | N/A                   | 16002  | 15855  | 1.32  | 127                         | 126                      | 0.952          |
|          |            | D04  |          |                       | 15707  |        |       | 125                         |                          |                |
| U004     | Abeta 1-38 | E03  | 2        | N/A                   | 25452  | 25909  | 2.49  | 2351                        | 2376                     | 1.47           |
|          |            | E04  |          |                       | 26366  |        |       | 2401                        |                          |                |
|          | Abeta 1-40 | E03  | 2        | N/A                   | 112058 | 114658 | 3.21  | 4514                        | 4592                     | 2.38           |

Plate: Plate\_\*25D1OAS391A\*

| Sample * | Assay      | Well | Dilution | Concentration (pg/ml) | Signal | Mean   | CV    | Calc. Concentration (pg/ml) | Calc. Conc. Mean (pg/ml) | Calc. Conc. CV |
|----------|------------|------|----------|-----------------------|--------|--------|-------|-----------------------------|--------------------------|----------------|
|          |            | E04  |          |                       | 117258 |        |       | 4669                        |                          |                |
|          | Abeta 1-42 | E04  | 2        | N/A                   | 22497  | 22370  | 0.806 | 162                         | 162                      | 0.585          |
|          |            | E03  |          |                       | 22242  |        |       | 161                         |                          |                |
| U005     | Abeta 1-38 | F03  | 2        | N/A                   | 25887  | 26289  | 2.16  | 2375                        | 2396                     | 1.27           |
|          |            | F04  |          |                       | 26690  |        |       | 2418                        |                          |                |
|          | Abeta 1-40 | F03  | 2        | N/A                   | 114328 | 118396 | 4.86  | 4582                        | 4703                     | 3.64           |
|          |            | F04  |          |                       | 122463 |        |       | 4824                        |                          |                |
|          | Abeta 1-42 | F04  | 2        | N/A                   | 75624  | 74419  | 2.29  | 396                         | 391                      | 1.71           |
|          |            | F03  |          |                       | 73213  |        |       | 386                         |                          |                |
| U006     | Abeta 1-38 | G03  | 2        | N/A                   | 29977  | 31021  | 4.76  | 2589                        | 2641                     | 2.8            |
|          |            | G04  |          |                       | 32065  |        |       | 2694                        |                          |                |
|          | Abeta 1-40 | G03  | 2        | N/A                   | 140533 | 143026 | 2.46  | 5361                        | 5435                     | 1.93           |
|          |            | G04  |          |                       | 145518 |        |       | 5509                        |                          |                |
|          | Abeta 1-42 | G03  | 2        | N/A                   | 102610 | 102639 | 0.039 | 498                         | 498                      | 0.03           |
|          |            | G04  |          |                       | 102667 |        |       | 498                         |                          |                |
| U007     | Abeta 1-38 | H03  | 2        | N/A                   | 7883   | 8020   | 2.42  | 1183                        | 1195                     | 1.42           |
|          |            | H04  |          |                       | 8157   |        |       | 1207                        |                          |                |
|          | Abeta 1-40 | H03  | 2        | N/A                   | 45851  | 46365  | 1.57  | 2432                        | 2450                     | 1.03           |
|          |            | H04  |          |                       | 46878  |        |       | 2468                        |                          |                |
|          | Abeta 1-42 | H04  | 2        | N/A                   | 8061   | 8041   | 0.361 | 77.3                        | 77.1                     | 0.261          |
|          |            | H03  |          |                       | 8020   |        |       | 77                          |                          |                |
|          | Abeta 1-38 | A06  | 2        | N/A                   | 30137  | 30370  | 1.08  | 2597                        | 2609                     | 0.639          |

Plate: Plate\_\*25D1OAS391A\*

| Sample *   | Assay      | Well       | Dilution | Concentration (pg/ml) | Signal | Mean   | CV    | Calc. Concentration (pg/ml) | Calc. Conc. Mean (pg/ml) | Calc. Conc. CV |
|------------|------------|------------|----------|-----------------------|--------|--------|-------|-----------------------------|--------------------------|----------------|
| U008       |            | A05        |          |                       | 30603  |        |       | 2621                        |                          |                |
|            | Abeta 1-40 | A06        | 2        | N/A                   | 137599 | 137366 | 0.24  | 5273                        | 5266                     | 0.186          |
|            |            | A05        |          |                       | 137133 |        |       | 5259                        |                          |                |
|            | Abeta 1-42 | A05        | 2        | N/A                   | 123739 | 122405 | 1.54  | 575                         | 570                      | 1.19           |
|            |            | A06        |          |                       | 121071 |        |       | 565                         |                          |                |
|            | U009       | Abeta 1-38 | B06      | 2                     | N/A    | 53678  | 55873 | 5.55                        | 3655                     | 3742           |
| B05        |            |            | 58067    |                       |        | 3830   |       |                             |                          |                |
| Abeta 1-40 |            | B06        | 2        | N/A                   | 208607 | 211385 | 1.86  | 7451                        | 7541                     | 1.68           |
|            |            | B05        |          |                       | 214162 |        |       | 7631                        |                          |                |
| Abeta 1-42 |            | B05        | 2        | N/A                   | 72279  | 72648  | 0.717 | 382                         | 384                      | 0.536          |
|            |            | B06        |          |                       | 73016  |        |       | 385                         |                          |                |
| U010       | Abeta 1-38 | C05        | 2        | N/A                   | 42410  | 42834  | 1.4   | 3178                        | 3196                     | 0.829          |
|            |            | C06        |          |                       | 43258  |        |       | 3215                        |                          |                |
|            | Abeta 1-40 | C05        | 2        | N/A                   | 165649 | 170506 | 4.03  | 6114                        | 6262                     | 3.34           |
|            |            | C06        |          |                       | 175362 |        |       | 6410                        |                          |                |
|            | Abeta 1-42 | C06        | 2        | N/A                   | 45172  | 44949  | 0.703 | 270                         | 269                      | 0.517          |
|            |            | C05        |          |                       | 44725  |        |       | 268                         |                          |                |
| U011       | Abeta 1-38 | D06        | 2        | N/A                   | 30829  | 29495  | 6.4   | 2632                        | 2564                     | 3.77           |
|            |            | D05        |          |                       | 28161  |        |       | 2496                        |                          |                |
|            | Abeta 1-40 | D05        | 2        | N/A                   | 141612 | 145049 | 3.35  | 5393                        | 5495                     | 2.64           |
|            |            |            |          |                       |        |        |       |                             |                          |                |

Plate: Plate\_\*25D1OAS391A\*

| Sample * | Assay      | Well | Dilution | Concentration (pg/ml) | Signal | Mean   | CV    | Calc. Concentration (pg/ml) | Calc. Conc. Mean (pg/ml) | Calc. Conc. CV |
|----------|------------|------|----------|-----------------------|--------|--------|-------|-----------------------------|--------------------------|----------------|
|          |            | D06  |          |                       | 148485 |        |       | 5598                        |                          |                |
|          | Abeta 1-42 | D06  | 2        | N/A                   | 98741  | 105328 | 8.84  | 484                         | 508                      | 6.76           |
|          |            | D05  |          |                       | 111915 |        |       | 532                         |                          |                |
| U012     | Abeta 1-38 | E06  | 2        | N/A                   | 28378  | 29085  | 3.44  | 2507                        | 2543                     | 2.02           |
|          |            | E05  |          |                       | 29791  |        |       | 2580                        |                          |                |
|          | Abeta 1-40 | E06  | 2        | N/A                   | 138731 | 135566 | 3.3   | 5307                        | 5213                     | 2.55           |
|          |            | E05  |          |                       | 132400 |        |       | 5119                        |                          |                |
|          | Abeta 1-42 | E06  | 2        | N/A                   | 116179 | 117215 | 1.25  | 548                         | 552                      | 0.963          |
|          |            | E05  |          |                       | 118251 |        |       | 555                         |                          |                |
| U013     | Abeta 1-38 | F05  | 2        | N/A                   | 3756   | 3662   | 3.63  | 764                         | 753                      | 2.15           |
|          |            | F06  |          |                       | 3568   |        |       | 741                         |                          |                |
|          | Abeta 1-40 | F06  | 2        | N/A                   | 24817  | 24075  | 4.36  | 1634                        | 1602                     | 2.78           |
|          |            | F05  |          |                       | 23333  |        |       | 1571                        |                          |                |
|          | Abeta 1-42 | F05  | 2        | N/A                   | 11279  | 11291  | 0.144 | 98.5                        | 98.6                     | 0.104          |
|          |            | F06  |          |                       | 11302  |        |       | 98.7                        |                          |                |
| U014     | Abeta 1-38 | G06  | 2        | N/A                   | 6192   | 5805   | 9.44  | 1026                        | 987                      | 5.56           |
|          |            | G05  |          |                       | 5417   |        |       | 949                         |                          |                |
|          | Abeta 1-40 | G06  | 2        | N/A                   | 32680  | 30944  | 7.93  | 1950                        | 1882                     | 5.12           |
|          |            | G05  |          |                       | 29208  |        |       | 1813                        |                          |                |
|          | Abeta 1-42 | G06  | 2        | N/A                   | 16518  | 15862  | 5.85  | 130                         | 126                      | 4.23           |
|          |            | G05  |          |                       | 15206  |        |       | 122                         |                          |                |
|          | Abeta 1-38 | H06  | 2        | N/A                   | 37639  | 38049  | 1.52  | 2961                        | 2980                     | 0.9            |

Plate: Plate\_\*25D1OAS391A\*

| Sample *   | Assay      | Well       | Dilution | Concentration (pg/ml) | Signal | Mean  | CV    | Calc. Concentration (pg/ml) | Calc. Conc. Mean (pg/ml) | Calc. Conc. CV |
|------------|------------|------------|----------|-----------------------|--------|-------|-------|-----------------------------|--------------------------|----------------|
| U015       |            | H05        |          |                       | 38459  |       |       | 2999                        |                          |                |
|            | Abeta 1-40 | H06        | 2        | N/A                   | 17140  | 16673 | 3.97  | 6289                        | 6147                     | 3.26           |
|            |            | H05        |          |                       | 5      |       |       | 6005                        |                          |                |
|            | Abeta 1-42 | H06        | 2        | N/A                   | 58935  | 58076 | 2.09  | 328                         | 325                      | 1.55           |
|            |            | H05        |          |                       | 57216  |       |       | 321                         |                          |                |
|            | U016       | Abeta 1-38 | A08      | 2                     | N/A    | 20221 | 20594 | 2.56                        | 2054                     | 2076           |
| A07        |            |            | 20967    |                       |        | 2098  |       |                             |                          |                |
| Abeta 1-40 |            | A08        | 2        | N/A                   | 12513  | 12694 | 2.02  | 4903                        | 4957                     | 1.54           |
|            |            | A07        |          |                       | 12876  |       |       | 5011                        |                          |                |
| Abeta 1-42 |            | A07        | 2        | N/A                   | 10613  | 10689 | 1.01  | 511                         | 514                      | 0.775          |
|            |            | A08        |          |                       | 10766  |       |       | 517                         |                          |                |
| U017       | Abeta 1-38 | B07        | 2        | N/A                   | 14705  | 14455 | 2.45  | 1704                        | 1687                     | 1.44           |
|            |            | B08        |          |                       | 14204  |       |       | 1670                        |                          |                |
|            | Abeta 1-40 | B07        | 2        | N/A                   | 74746  | 75272 | 0.987 | 3381                        | 3397                     | 0.684          |
|            |            | B08        |          |                       | 75797  |       |       | 3414                        |                          |                |
|            | Abeta 1-42 | B08        | 2        | N/A                   | 40375  | 39462 | 3.27  | 249                         | 244                      | 2.4            |
|            |            | B07        |          |                       | 38549  |       |       | 240                         |                          |                |
| U018       | Abeta 1-38 | C07        | 2        | N/A                   | 2496   | 2507  | 0.592 | 599                         | 600                      | 0.355          |
|            |            | C08        |          |                       | 2517   |       |       | 602                         |                          |                |
|            | Abeta 1-40 | C07        | 2        | N/A                   | 16653  | 16817 | 1.37  | 1268                        | 1276                     | 0.868          |
|            |            | C08        |          |                       | 16980  |       |       | 1284                        |                          |                |
|            | Abeta 1-42 | C08        | 2        | N/A                   | 8028   | 8065  | 0.649 | 77                          | 77.3                     | 0.469          |
|            |            | C07        |          |                       | 8102   |       |       | 77.6                        |                          |                |

Plate: Plate\_\*25D1OAS391A\*

| Sample * | Assay      | Well | Dilution | Concentration (pg/ml) | Signal     | Mean       | CV    | Calc. Concentration (pg/ml) | Calc. Conc. Mean (pg/ml) | Calc. Conc. CV |
|----------|------------|------|----------|-----------------------|------------|------------|-------|-----------------------------|--------------------------|----------------|
| U019     | Abeta 1-38 | D07  | 2        | N/A                   | 51960      | 52387      | 1.15  | 3584                        | 3602                     | 0.685          |
|          |            | D08  |          |                       | 52813      |            |       | 3619                        |                          |                |
|          | Abeta 1-40 | D07  | 2        | N/A                   | 19898<br>1 | 19777<br>7 | 0.861 | 7144                        | 7106                     | 0.757          |
|          |            | D08  |          |                       | 19657<br>3 |            |       | 7068                        |                          |                |
|          | Abeta 1-42 | D07  | 2        | N/A                   | 68714      | 67940      | 1.61  | 368                         | 365                      | 1.2            |
|          |            | D08  |          |                       | 67166      |            |       | 362                         |                          |                |
| U020     | Abeta 1-38 | E07  | 2        | N/A                   | 54254      | 54433      | 0.465 | 3678                        | 3685                     | 0.277          |
|          |            | E08  |          |                       | 54612      |            |       | 3692                        |                          |                |
|          | Abeta 1-40 | E07  | 2        | N/A                   | 20493<br>0 | 20129<br>7 | 2.55  | 7333                        | 7218                     | 2.26           |
|          |            | E08  |          |                       | 19766<br>4 |            |       | 7103                        |                          |                |
|          | Abeta 1-42 | E08  | 2        | N/A                   | 66412      | 65116      | 2.82  | 359                         | 354                      | 2.1            |
|          |            | E07  |          |                       | 63819      |            |       | 348                         |                          |                |
| U021     | Abeta 1-38 | F07  | 2        | N/A                   | 54166      | 54325      | 0.414 | 3674                        | 3681                     | 0.246          |
|          |            | F08  |          |                       | 54484      |            |       | 3687                        |                          |                |
|          | Abeta 1-40 | F08  | 2        | N/A                   | 19145<br>8 | 19356<br>1 | 1.54  | 6908                        | 6974                     | 1.34           |
|          |            | F07  |          |                       | 19566<br>4 |            |       | 7040                        |                          |                |
|          | Abeta 1-42 | F08  | 2        | N/A                   | 65575      | 65385      | 0.411 | 356                         | 355                      | 0.306          |
|          |            | F07  |          |                       | 65195      |            |       | 354                         |                          |                |
| U022     | Abeta 1-38 | G07  | 2        | N/A                   | 49489      | 49253      | 0.678 | 3482                        | 3472                     | 0.403          |
|          |            | G08  |          |                       | 49017      |            |       | 3462                        |                          |                |
|          | Abeta 1-40 | G07  | 2        | N/A                   | 18722<br>2 | 18100<br>3 | 4.86  | 6776                        | 6584                     | 4.12           |

Plate: Plate\_\*25D1OAS391A\*

| Sample * | Assay      | Well | Dilution | Concentration (pg/ml) | Signal     | Mean       | CV    | Calc. Concentration (pg/ml) | Calc. Conc. Mean (pg/ml) | Calc. Conc. CV |
|----------|------------|------|----------|-----------------------|------------|------------|-------|-----------------------------|--------------------------|----------------|
|          |            | G08  |          |                       | 17478<br>4 |            |       | 6392                        |                          |                |
|          | Abeta 1-42 | G07  | 2        | N/A                   | 53823      | 53575      | 0.655 | 307                         | 306                      | 0.484          |
|          |            | G08  |          |                       | 53327      |            |       | 305                         |                          |                |
| U023     | Abeta 1-38 | H07  | 2        | N/A                   | 46535      | 45273      | 3.94  | 3357                        | 3303                     | 2.34           |
|          |            | H08  |          |                       | 44011      |            |       | 3248                        |                          |                |
|          | Abeta 1-40 | H07  | 2        | N/A                   | 17058<br>4 | 16544<br>4 | 4.39  | 6264                        | 6108                     | 3.61           |
|          |            | H08  |          |                       | 16030<br>3 |            |       | 5953                        |                          |                |
|          | Abeta 1-42 | H08  | 2        | N/A                   | 45313      | 46583      | 3.85  | 271                         | 276                      | 2.83           |
|          |            | H07  |          |                       | 47852      |            |       | 282                         |                          |                |
| U024     | Abeta 1-38 | A10  | 2        | N/A                   | 13861      | 14229      | 3.66  | 1646                        | 1672                     | 2.14           |
|          |            | A09  |          |                       | 14597      |            |       | 1697                        |                          |                |
|          | Abeta 1-40 | A09  | 2        | N/A                   | 78037      | 80002      | 3.47  | 3484                        | 3544                     | 2.43           |
|          |            | A10  |          |                       | 81966      |            |       | 3605                        |                          |                |
|          | Abeta 1-42 | A10  | 2        | N/A                   | 41256      | 41224      | 0.11  | 253                         | 252                      | 0.08           |
|          |            | A09  |          |                       | 41192      |            |       | 252                         |                          |                |
| U025     | Abeta 1-38 | B10  | 2        | N/A                   | 11467      | 11450      | 0.21  | 1473                        | 1472                     | 0.123          |
|          |            | B09  |          |                       | 11433      |            |       | 1471                        |                          |                |
|          | Abeta 1-40 | B10  | 2        | N/A                   | 67960      | 67045      | 1.93  | 3167                        | 3137                     | 1.32           |
|          |            | B09  |          |                       | 66129      |            |       | 3108                        |                          |                |
|          | Abeta 1-42 | B10  | 2        | N/A                   | 33709      | 33492      | 0.916 | 218                         | 217                      | 0.669          |
|          |            | B09  |          |                       | 33275      |            |       | 216                         |                          |                |
| U026     | Abeta 1-38 | C09  | 2        | N/A                   | 4959       | 4866       | 2.7   | 900                         | 890                      | 1.59           |
|          |            | C10  |          |                       | 4773       |            |       | 880                         |                          |                |
|          | Abeta 1-40 | C10  | 2        | N/A                   | 32225      | 32307      | 0.357 | 1932                        | 1935                     | 0.23           |
|          |            | C09  |          |                       | 32388      |            |       | 1938                        |                          |                |



Plate: Plate\_\*25D1OAS391A\*

| Sample * | Assay      | Well | Dilution | Concentration (pg/ml) | Signal     | Mean       | CV    | Calc. Concentration (pg/ml) | Calc. Conc. Mean (pg/ml) | Calc. Conc. CV |
|----------|------------|------|----------|-----------------------|------------|------------|-------|-----------------------------|--------------------------|----------------|
|          | Abeta 1-42 | C09  | 2        | N/A                   | 5697       | 5665       | 0.799 | 60.1                        | 59.8                     | 0.58           |
|          |            | C10  |          |                       | 5633       |            |       | 59.6                        |                          |                |
|          | Abeta 1-38 | D10  | 2        | N/A                   | 49769      | 49363      | 1.16  | 3494                        | 3477                     | 0.692          |
|          |            | D09  |          |                       | 48956      |            |       | 3460                        |                          |                |
| U027     | Abeta 1-40 | D10  | 2        | N/A                   | 19774<br>4 | 19564<br>4 | 1.52  | 7105                        | 7039                     | 1.33           |
|          |            | D09  |          |                       | 19354<br>3 |            |       | 6973                        |                          |                |
|          | Abeta 1-42 | D10  | 2        | N/A                   | 61088      | 61151      | 0.146 | 337                         | 338                      | 0.108          |
|          |            | D09  |          |                       | 61214      |            |       | 338                         |                          |                |
|          | Abeta 1-38 | E10  | 2        | N/A                   | 7974       | 8002       | 0.495 | 1191                        | 1193                     | 0.29           |
|          |            | E09  |          |                       | 8030       |            |       | 1196                        |                          |                |
| U028     | Abeta 1-40 | E10  | 2        | N/A                   | 44116      | 43498      | 2.01  | 2371                        | 2349                     | 1.32           |
|          |            | E09  |          |                       | 42880      |            |       | 2327                        |                          |                |
|          | Abeta 1-42 | E10  | 2        | N/A                   | 22366      | 22439      | 0.457 | 162                         | 162                      | 0.331          |
|          |            | E09  |          |                       | 22511      |            |       | 162                         |                          |                |
|          | Abeta 1-38 | F10  | 2        | N/A                   | 29637      | 29768      | 0.62  | 2572                        | 2578                     | 0.365          |
|          |            | F09  |          |                       | 29898      |            |       | 2585                        |                          |                |
| U029     | Abeta 1-40 | F10  | 2        | N/A                   | 13698<br>9 | 13499<br>1 | 2.09  | 5255                        | 5196                     | 1.62           |
|          |            | F09  |          |                       | 13299<br>2 |            |       | 5136                        |                          |                |
|          | Abeta 1-42 | F09  | 2        | N/A                   | 10454<br>3 | 10603<br>9 | 1.99  | 505                         | 511                      | 1.52           |
|          |            | F10  |          |                       | 10753<br>4 |            |       | 516                         |                          |                |
|          | Abeta 1-38 | G10  | 2        | N/A                   | 26146      | 26669      | 2.77  | 2389                        | 2417                     | 1.63           |
|          |            | G09  |          |                       | 27191      |            |       | 2445                        |                          |                |

Plate: Plate\_\*25D1OAS391A\*

| Sample * | Assay      | Well | Dilution | Concentration (pg/ml) | Signal | Mean   | CV   | Calc. Concentration (pg/ml) | Calc. Conc. Mean (pg/ml) | Calc. Conc. CV |
|----------|------------|------|----------|-----------------------|--------|--------|------|-----------------------------|--------------------------|----------------|
| U030     | Abeta 1-40 | G10  | 2        | N/A                   | 117394 | 115996 | 1.7  | 4673                        | 4631                     | 1.27           |
|          |            | G09  |          |                       | 114598 |        |      | 4590                        |                          |                |
|          | Abeta 1-42 | G09  | 2        | N/A                   | 85620  | 86435  | 1.33 | 434                         | 437                      | 1.01           |
|          |            | G10  |          |                       | 87250  |        |      | 440                         |                          |                |
| U031     | Abeta 1-38 | H09  | 2        | N/A                   | 25092  | 25734  | 3.53 | 2332                        | 2367                     | 2.07           |
|          |            | H10  |          |                       | 26376  |        |      | 2401                        |                          |                |
|          | Abeta 1-40 | H10  | 2        | N/A                   | 118896 | 114783 | 5.07 | 4718                        | 4595                     | 3.77           |
|          |            | H09  |          |                       | 110669 |        |      | 4473                        |                          |                |
|          | Abeta 1-42 | H10  | 2        | N/A                   | 79836  | 79003  | 1.49 | 412                         | 409                      | 1.12           |
|          |            | H09  |          |                       | 78169  |        |      | 405                         |                          |                |
| U032     | Abeta 1-38 | A11  | 2        | N/A                   | 23933  | 21972  | 12.6 | 2268                        | 2155                     | 7.42           |
|          |            | A12  |          |                       | 20010  |        |      | 2042                        |                          |                |
|          | Abeta 1-40 | A11  | 2        | N/A                   | 130688 | 127629 | 3.39 | 5068                        | 4977                     | 2.58           |
|          |            | A12  |          |                       | 124570 |        |      | 4886                        |                          |                |
|          | Abeta 1-42 | A11  | 2        | N/A                   | 22976  | 22257  | 4.57 | 165                         | 161                      | 3.31           |
|          |            | A12  |          |                       | 21538  |        |      | 157                         |                          |                |

**Data Grid Legend**

| Name                          | Abbreviation |
|-------------------------------|--------------|
| Assay                         | A:           |
| Assay Results                 | AR:          |
| Calculated Concentration      | CC:          |
| Calculated Concentration C.V. | CCCV:        |
| Calculated Concentration Mean | CCM:         |
| Calculated Concentration S.D. | CCSD:        |
| Concentrations                | C:           |
| Detection Range               | DR:          |
| Dilutions                     | D:           |
| % Recovery                    | %R:          |
| % Recovery Mean               | %RM:         |
| Sample                        | S:           |
| Sample Group                  | SG:          |
| Signal C.V.                   | CV:          |
| Signal Mean                   | M:           |
| Signal                        | R:           |
| Signal S.D.                   | SD:          |

## Data Grid - Abeta 1-40

|          | 1                                           | 2                                           | 3                           | 4                           | 5                           | 6                           | 7                           | 8                           | 9                           | 10                          | 11                                        | 12                                        |
|----------|---------------------------------------------|---------------------------------------------|-----------------------------|-----------------------------|-----------------------------|-----------------------------|-----------------------------|-----------------------------|-----------------------------|-----------------------------|-------------------------------------------|-------------------------------------------|
| <b>A</b> | R:<br>556601<br>C:<br>15316<br>CC:<br>17336 | R:<br>561671<br>C:<br>15316<br>CC:<br>18020 | R:<br>94593<br>CC:<br>3990  | R:<br>96693<br>CC:<br>4054  | R:<br>137133<br>CC:<br>5259 | R:<br>137599<br>CC:<br>5273 | R:<br>128761<br>CC:<br>5011 | R:<br>125133<br>CC:<br>4903 | R:<br>78037<br>CC:<br>3484  | R:<br>81966<br>CC:<br>3605  | R:<br>130688<br>CC:<br>5068               | R:<br>124570<br>CC:<br>4886               |
| <b>B</b> | R:<br>195698<br>C:<br>3829<br>CC:<br>3520   | R:<br>198310<br>C:<br>3829<br>CC:<br>3562   | R:<br>63327<br>CC:<br>3018  | R:<br>68576<br>CC:<br>3186  | R:<br>214162<br>CC:<br>7631 | R:<br>208607<br>CC:<br>7451 | R:<br>74746<br>CC:<br>3381  | R:<br>75797<br>CC:<br>3414  | R:<br>66129<br>CC:<br>3108  | R:<br>67960<br>CC:<br>3167  | R:<br>108084<br>CC:<br>4396               | R:<br>99221<br>CC:<br>4130                |
| <b>C</b> | R:<br>33382<br>C: 957<br>CC:<br>988         | R:<br>35950<br>C: 957<br>CC:<br>1037        | R:<br>147579<br>CC:<br>5571 | R:<br>154726<br>CC:<br>5785 | R:<br>165649<br>CC:<br>6114 | R:<br>175362<br>CC:<br>6410 | R:<br>16653<br>CC:<br>1268  | R:<br>16980<br>CC:<br>1284  | R:<br>32388<br>CC:<br>1938  | R:<br>32225<br>CC:<br>1932  | R:<br>184261<br>C:<br>3829<br>CC:<br>3342 | R:<br>181582<br>C:<br>3829<br>CC:<br>3301 |
| <b>D</b> | R:<br>3757<br>C: 239<br>CC:<br>249          | R:<br>3552<br>C: 239<br>CC:<br>240          | R:<br>84356<br>CC:<br>3679  | R:<br>88332<br>CC:<br>3800  | R:<br>141612<br>CC:<br>5393 | R:<br>148485<br>CC:<br>5598 | R:<br>198981<br>CC:<br>7144 | R:<br>196573<br>CC:<br>7068 | R:<br>193543<br>CC:<br>6973 | R:<br>197744<br>CC:<br>7105 | R:<br>30329<br>C: 957<br>CC:<br>929       | R:<br>31431<br>C: 957<br>CC:<br>951       |
| <b>E</b> | R: 399<br>C: 59.8<br>CC:<br>55.3            | R: 440<br>C: 59.8<br>CC:<br>59.6            | R:<br>112058<br>CC:<br>4514 | R:<br>117258<br>CC:<br>4669 | R:<br>132400<br>CC:<br>5119 | R:<br>138731<br>CC:<br>5307 | R:<br>204930<br>CC:<br>7333 | R:<br>197664<br>CC:<br>7103 | R:<br>42880<br>CC:<br>2327  | R:<br>44116<br>CC:<br>2371  | R:<br>3550<br>C: 239<br>CC:<br>240        | R:<br>3576<br>C: 239<br>CC:<br>241        |
| <b>F</b> | R: 118<br>C: 15<br>CC:<br>14.5              | R: 123<br>C: 15<br>CC:<br>15.7              | R:<br>114328<br>CC:<br>4582 | R:<br>122463<br>CC:<br>4824 | R:<br>23333<br>CC:<br>1571  | R:<br>24817<br>CC:<br>1634  | R:<br>195664<br>CC:<br>7040 | R:<br>191458<br>CC:<br>6908 | R:<br>132992<br>CC:<br>5136 | R:<br>136989<br>CC:<br>5255 | R: 416<br>C: 59.8<br>CC:<br>57.1          | R: 408<br>C: 59.8<br>CC:<br>56.3          |
| <b>G</b> | R: 84<br>C: 3.74<br>CC:<br>2.07             | R: 90<br>C: 3.74<br>CC:<br>5.58             | R:<br>140533<br>CC:<br>5361 | R:<br>145518<br>CC:<br>5509 | R:<br>29208<br>CC:<br>1813  | R:<br>32680<br>CC:<br>1950  | R:<br>187222<br>CC:<br>6776 | R:<br>174784<br>CC:<br>6392 | R:<br>114598<br>CC:<br>4590 | R:<br>117394<br>CC:<br>4673 | R:<br>165082<br>CC:<br>6097               | R:<br>160346<br>CC:<br>5954               |
| <b>H</b> | R: 66                                       | R: 62                                       | R:<br>45851<br>CC:<br>2432  | R:<br>46878<br>CC:<br>2468  | R:<br>162055<br>CC:<br>6005 | R:<br>171405<br>CC:<br>6289 | R:<br>170584<br>CC:<br>6264 | R:<br>160303<br>CC:<br>5953 | R:<br>110669<br>CC:<br>4473 | R:<br>118896<br>CC:<br>4718 | R:<br>85455<br>CC:<br>3712                | R:<br>79507<br>CC:<br>3529                |

## Data Grid - Abeta 1-38

|          | 1                                  | 2                                  | 3                    | 4                    | 5                    | 6                    | 7                    | 8                    | 9                    | 10                   | 11                              | 12                              |
|----------|------------------------------------|------------------------------------|----------------------|----------------------|----------------------|----------------------|----------------------|----------------------|----------------------|----------------------|---------------------------------|---------------------------------|
| <b>A</b> | R: 736853<br>C: 10763<br>CC: 10737 | R: 723376<br>C: 10763<br>CC: 10557 | R: 13791<br>CC: 1641 | R: 14148<br>CC: 1666 | R: 30603<br>CC: 2621 | R: 30137<br>CC: 2597 | R: 20967<br>CC: 2098 | R: 20221<br>CC: 2054 | R: 14597<br>CC: 1697 | R: 13861<br>CC: 1646 | R: 23933<br>CC: 2268            | R: 20010<br>CC: 2042            |
| <b>B</b> | R: 111793<br>C: 2691<br>CC: 2844   | R: 117062<br>C: 2691<br>CC: 2926   | R: 11978<br>CC: 1511 | R: 13256<br>CC: 1604 | R: 58067<br>CC: 3830 | R: 53678<br>CC: 3655 | R: 14705<br>CC: 1704 | R: 14204<br>CC: 1670 | R: 11433<br>CC: 1471 | R: 11467<br>CC: 1473 | R: 17160<br>CC: 1866            | R: 16007<br>CC: 1791            |
| <b>C</b> | R: 7503<br>C: 673<br>CC: 574       | R: 10602<br>C: 673<br>CC: 704      | R: 37901<br>CC: 2973 | R: 38149<br>CC: 2985 | R: 42410<br>CC: 3178 | R: 43258<br>CC: 3215 | R: 2496<br>CC: 599   | R: 2517<br>CC: 602   | R: 4959<br>CC: 900   | R: 4773<br>CC: 880   | R: 91163<br>C: 2691<br>CC: 2511 | R: 90619<br>C: 2691<br>CC: 2502 |
| <b>D</b> | R: 974<br>C: 168<br>CC: 168        | R: 865<br>C: 168<br>CC: 156        | R: 17869<br>CC: 1911 | R: 18124<br>CC: 1927 | R: 28161<br>CC: 2496 | R: 30829<br>CC: 2632 | R: 51960<br>CC: 3584 | R: 52813<br>CC: 3619 | R: 48956<br>CC: 3460 | R: 49769<br>CC: 3494 | R: 8731<br>C: 673<br>CC: 628    | R: 8853<br>C: 673<br>CC: 633    |
| <b>E</b> | R: 191<br>C: 42<br>CC: 48.8        | R: 204<br>C: 42<br>CC: 52.2        | R: 25452<br>CC: 2351 | R: 26366<br>CC: 2401 | R: 29791<br>CC: 2580 | R: 28378<br>CC: 2507 | R: 54254<br>CC: 3678 | R: 54612<br>CC: 3692 | R: 8030<br>CC: 1196  | R: 7974<br>CC: 1191  | R: 944<br>C: 168<br>CC: 165     | R: 880<br>C: 168<br>CC: 157     |
| <b>F</b> | R: 93<br>C: 10.5<br>CC: 9.91       | R: 106<br>C: 10.5<br>CC: 18.5      | R: 25887<br>CC: 2375 | R: 26690<br>CC: 2418 | R: 3756<br>CC: 764   | R: 3568<br>CC: 741   | R: 54166<br>CC: 3674 | R: 54484<br>CC: 3687 | R: 29898<br>CC: 2585 | R: 29637<br>CC: 2572 | R: 190<br>C: 42<br>CC: 48.5     | R: 195<br>C: 42<br>CC: 49.9     |
| <b>G</b> | R: 71<br>C: 2.63<br>CC: 0          | R: 87<br>C: 2.63<br>CC: 2.57       | R: 29977<br>CC: 2589 | R: 32065<br>CC: 2694 | R: 5417<br>CC: 949   | R: 6192<br>CC: 1026  | R: 49489<br>CC: 3482 | R: 49017<br>CC: 3462 | R: 27191<br>CC: 2445 | R: 26146<br>CC: 2389 | R: 40527<br>CC: 3093            | R: 38474<br>CC: 3000            |
| <b>H</b> | R: 67                              | R: 76                              | R: 7883<br>CC: 1183  | R: 8157<br>CC: 1207  | R: 38459<br>CC: 2999 | R: 37639<br>CC: 2961 | R: 46535<br>CC: 3357 | R: 44011<br>CC: 3248 | R: 25092<br>CC: 2332 | R: 26376<br>CC: 2401 | R: 13714<br>CC: 1636            | R: 11867<br>CC: 1503            |

## Data Grid - Abeta 1-42

|          | 1                                | 2                                | 3                    | 4                    | 5                    | 6                    | 7                    | 8                    | 9                    | 10                   | 11                              | 12                              |
|----------|----------------------------------|----------------------------------|----------------------|----------------------|----------------------|----------------------|----------------------|----------------------|----------------------|----------------------|---------------------------------|---------------------------------|
| <b>A</b> | R: 680597<br>C: 1379<br>CC: 1370 | R: 674427<br>C: 1379<br>CC: 1355 | R: 63570<br>CC: 347  | R: 62878<br>CC: 345  | R: 123739<br>CC: 575 | R: 121071<br>CC: 565 | R: 106130<br>CC: 511 | R: 107661<br>CC: 517 | R: 41192<br>CC: 252  | R: 41256<br>CC: 253  | R: 22976<br>CC: 165             | R: 21538<br>CC: 157             |
| <b>B</b> | R: 160366<br>C: 345<br>CC: 352   | R: 163164<br>C: 345<br>CC: 357   | R: 12323<br>CC: 105  | R: 12615<br>CC: 107  | R: 72279<br>CC: 382  | R: 73016<br>CC: 385  | R: 38549<br>CC: 240  | R: 40375<br>CC: 249  | R: 33275<br>CC: 216  | R: 33709<br>CC: 218  | R: 75444<br>CC: 395             | R: 72485<br>CC: 383             |
| <b>C</b> | R: 26541<br>C: 86.2<br>CC: 91.5  | R: 26781<br>C: 86.2<br>CC: 92.1  | R: 34450<br>CC: 221  | R: 33763<br>CC: 218  | R: 44725<br>CC: 268  | R: 45172<br>CC: 270  | R: 8102<br>CC: 77.6  | R: 8028<br>CC: 77    | R: 5697<br>CC: 60.1  | R: 5633<br>CC: 59.6  | R: 145395<br>C: 345<br>CC: 326  | R: 142643<br>C: 345<br>CC: 321  |
| <b>D</b> | R: 2796<br>C: 21.5<br>CC: 17.9   | R: 3378<br>C: 21.5<br>CC: 20.5   | R: 16002<br>CC: 127  | R: 15707<br>CC: 125  | R: 111915<br>CC: 532 | R: 98741<br>CC: 484  | R: 68714<br>CC: 368  | R: 67166<br>CC: 362  | R: 61214<br>CC: 338  | R: 61088<br>CC: 337  | R: 18429<br>C: 86.2<br>CC: 70.3 | R: 21889<br>C: 86.2<br>CC: 79.6 |
| <b>E</b> | R: 621<br>C: 5.39<br>CC: 5.62    | R: 648<br>C: 5.39<br>CC: 5.82    | R: 22242<br>CC: 161  | R: 22497<br>CC: 162  | R: 118251<br>CC: 555 | R: 116179<br>CC: 548 | R: 63819<br>CC: 348  | R: 66412<br>CC: 359  | R: 22511<br>CC: 162  | R: 22366<br>CC: 162  | R: 3154<br>C: 21.5<br>CC: 19.5  | R: 2911<br>C: 21.5<br>CC: 18.4  |
| <b>F</b> | R: 168<br>C: 1.35<br>CC: 1.48    | R: 183<br>C: 1.35<br>CC: 1.67    | R: 73213<br>CC: 386  | R: 75624<br>CC: 396  | R: 11279<br>CC: 98.5 | R: 11302<br>CC: 98.7 | R: 65195<br>CC: 354  | R: 65575<br>CC: 356  | R: 104543<br>CC: 505 | R: 107534<br>CC: 516 | R: 541<br>C: 5.39<br>CC: 5.01   | R: 539<br>C: 5.39<br>CC: 5      |
| <b>G</b> | R: 89<br>C: 0.337<br>CC: 0.156   | R: 92<br>C: 0.337<br>CC: 0.243   | R: 102610<br>CC: 498 | R: 102667<br>CC: 498 | R: 15206<br>CC: 122  | R: 16518<br>CC: 130  | R: 53823<br>CC: 307  | R: 53327<br>CC: 305  | R: 85620<br>CC: 434  | R: 87250<br>CC: 440  | R: 53420<br>CC: 305             | R: 49677<br>CC: 290             |
| <b>H</b> | R: 69                            | R: 64                            | R: 8020<br>CC: 77    | R: 8061<br>CC: 77.3  | R: 57216<br>CC: 321  | R: 58935<br>CC: 328  | R: 47852<br>CC: 282  | R: 45313<br>CC: 271  | R: 78169<br>CC: 405  | R: 79836<br>CC: 412  | R: 48503<br>CC: 284             | R: 46698<br>CC: 277             |

## Standard Data Table

Plate: Plate\_\*25D1OAS391A\*

Assay: Abeta 1-38

Group: Standard

| Sample * | Well | Concentration (pg/ml) | Signal | Mean   | CV   | Calc. Concentration (pg/ml) | Calc. Conc. Mean (pg/ml) | Calc. Conc. CV |
|----------|------|-----------------------|--------|--------|------|-----------------------------|--------------------------|----------------|
| S001     | A01  | 10763                 | 736853 | 730115 | 1.31 | 10737                       | 10647                    | 1.2            |
|          | A02  |                       | 723376 |        |      | 10557                       |                          |                |
| S002     | B02  | 2691                  | 117062 | 114428 | 3.26 | 2926                        | 2885                     | 2              |
|          | B01  |                       | 111793 |        |      | 2844                        |                          |                |
| S003     | C01  | 673                   | 7503   | 9053   | 24.2 | 574                         | 639                      | 14.3           |
|          | C02  |                       | 10602  |        |      | 704                         |                          |                |
| S004     | D02  | 168                   | 865    | 920    | 8.38 | 156                         | 162                      | 5.36           |
|          | D01  |                       | 974    |        |      | 168                         |                          |                |
| S005     | E02  | 42                    | 204    | 198    | 4.65 | 52.2                        | 50.5                     | 4.79           |
|          | E01  |                       | 191    |        |      | 48.8                        |                          |                |
| S006     | F02  | 10.5                  | 106    | 100    | 9.24 | 18.5                        | 14.2                     | 42.9           |
|          | F01  |                       | 93     |        |      | 9.91                        |                          |                |
| S007     | G01  | 2.63                  | 71     | 79     | 14.3 | 0                           | 1.28                     | 141            |
|          | G02  |                       | 87     |        |      | 2.57                        |                          |                |

## Standard Analysis Properties

| Name                       | Value                                             |
|----------------------------|---------------------------------------------------|
| Algorithm Parameters       |                                                   |
| Initial Top                | 737416                                            |
| Initial Bottom             | 71.1                                              |
| Initial MidPoint           | 5977                                              |
| Initial HillSlope          | 1                                                 |
| Weighting                  | 1/y^2                                             |
| Max Iteration              | 500                                               |
| Fit Statistics             |                                                   |
| RSquared                   | 1                                                 |
| Calculated Parameters      |                                                   |
| Top                        | 1965831                                           |
| Bottom                     | 86.4                                              |
| MidPoint                   | 14434                                             |
| HillSlope                  | 1.73                                              |
| Detection Range Parameters |                                                   |
| Low                        | 23.2                                              |
| High                       | 10763                                             |
| Equation                   |                                                   |
| FourPL                     | $y = b_2 + \frac{b_1 - b_2}{1 + (x / b_3)^{b_4}}$ |



## Unknown Data Table

Plate: Plate\_\*25D1OAS391A\*

Assay: Abeta 1-38

Group: Unknown

| Sample #   | Well | Signal | Mean  | CV    | Calc. Concentration (pg/ml) | Calc. Conc. Mean (pg/ml) | Calc. Conc. CV |
|------------|------|--------|-------|-------|-----------------------------|--------------------------|----------------|
| Control 1  | A03  | 13791  | 13970 | 1.81  | 1641                        | 1654                     | 1.06           |
|            | A04  | 14148  |       |       | 1666                        |                          |                |
| Control 2  | H11  | 13714  | 12791 | 10.2  | 1636                        | 1570                     | 5.99           |
|            | H12  | 11867  |       |       | 1503                        |                          |                |
| NAD1 Alpha | G11  | 40527  | 39501 | 3.68  | 3093                        | 3046                     | 2.17           |
|            | G12  | 38474  |       |       | 3000                        |                          |                |
| NCT1 Alpha | B11  | 17160  | 16584 | 4.92  | 1866                        | 1829                     | 2.88           |
|            | B12  | 16007  |       |       | 1791                        |                          |                |
| U001       | B03  | 11978  | 12617 | 7.16  | 1511                        | 1558                     | 4.2            |
|            | B04  | 13256  |       |       | 1604                        |                          |                |
| U002       | C03  | 37901  | 38025 | 0.461 | 2973                        | 2979                     | 0.273          |
|            | C04  | 38149  |       |       | 2985                        |                          |                |
| U003       | D04  | 18124  | 17997 | 1     | 1927                        | 1919                     | 0.587          |
|            | D03  | 17869  |       |       | 1911                        |                          |                |
| U004       | E03  | 25452  | 25909 | 2.49  | 2351                        | 2376                     | 1.47           |
|            | E04  | 26366  |       |       | 2401                        |                          |                |
| U005       | F03  | 25887  | 26289 | 2.16  | 2375                        | 2396                     | 1.27           |
|            | F04  | 26690  |       |       | 2418                        |                          |                |
| U006       | G03  | 29977  | 31021 | 4.76  | 2589                        | 2641                     | 2.8            |
|            | G04  | 32065  |       |       | 2694                        |                          |                |
| U007       | H03  | 7883   | 8020  | 2.42  | 1183                        | 1195                     | 1.42           |
|            | H04  | 8157   |       |       | 1207                        |                          |                |
| U008       | A06  | 30137  | 30370 | 1.08  | 2597                        | 2609                     | 0.639          |
|            | A05  | 30603  |       |       | 2621                        |                          |                |
| U009       | B06  | 53678  | 55873 | 5.55  | 3655                        | 3742                     | 3.31           |

Plate: Plate\_\*25D1OAS391A\*

Assay: Abeta 1-38

Group: Unknown

| Sample # | Well | Signal | Mean  | CV    | Calc. Concentration (pg/ml) | Calc. Conc. Mean (pg/ml) | Calc. Conc. CV |
|----------|------|--------|-------|-------|-----------------------------|--------------------------|----------------|
|          | B05  | 58067  |       |       | 3830                        |                          |                |
| U010     | C05  | 42410  | 42834 | 1.4   | 3178                        | 3196                     | 0.829          |
|          | C06  | 43258  |       |       | 3215                        |                          |                |
| U011     | D06  | 30829  | 29495 | 6.4   | 2632                        | 2564                     | 3.77           |
|          | D05  | 28161  |       |       | 2496                        |                          |                |
| U012     | E06  | 28378  | 29085 | 3.44  | 2507                        | 2543                     | 2.02           |
|          | E05  | 29791  |       |       | 2580                        |                          |                |
| U013     | F05  | 3756   | 3662  | 3.63  | 764                         | 753                      | 2.15           |
|          | F06  | 3568   |       |       | 741                         |                          |                |
| U014     | G06  | 6192   | 5805  | 9.44  | 1026                        | 987                      | 5.56           |
|          | G05  | 5417   |       |       | 949                         |                          |                |
| U015     | H06  | 37639  | 38049 | 1.52  | 2961                        | 2980                     | 0.9            |
|          | H05  | 38459  |       |       | 2999                        |                          |                |
| U016     | A08  | 20221  | 20594 | 2.56  | 2054                        | 2076                     | 1.5            |
|          | A07  | 20967  |       |       | 2098                        |                          |                |
| U017     | B07  | 14705  | 14455 | 2.45  | 1704                        | 1687                     | 1.44           |
|          | B08  | 14204  |       |       | 1670                        |                          |                |
| U018     | C07  | 2496   | 2507  | 0.592 | 599                         | 600                      | 0.355          |
|          | C08  | 2517   |       |       | 602                         |                          |                |
| U019     | D07  | 51960  | 52387 | 1.15  | 3584                        | 3602                     | 0.685          |
|          | D08  | 52813  |       |       | 3619                        |                          |                |
| U020     | E07  | 54254  | 54433 | 0.465 | 3678                        | 3685                     | 0.277          |
|          | E08  | 54612  |       |       | 3692                        |                          |                |
| U021     | F07  | 54166  | 54325 | 0.414 | 3674                        | 3681                     | 0.246          |
|          | F08  | 54484  |       |       | 3687                        |                          |                |
| U022     | G07  | 49489  | 49253 | 0.678 | 3482                        | 3472                     | 0.403          |
|          | G08  | 49017  |       |       | 3462                        |                          |                |

Plate: Plate\_\*25D1OAS391A\*

Assay: Abeta 1-38

Group: Unknown

| Sample # | Well | Signal | Mean  | CV    | Calc. Concentration (pg/ml) | Calc. Conc. Mean (pg/ml) | Calc. Conc. CV |
|----------|------|--------|-------|-------|-----------------------------|--------------------------|----------------|
| U023     | H07  | 46535  | 45273 | 3.94  | 3357                        | 3303                     | 2.34           |
|          | H08  | 44011  |       |       | 3248                        |                          |                |
| U024     | A10  | 13861  | 14229 | 3.66  | 1646                        | 1672                     | 2.14           |
|          | A09  | 14597  |       |       | 1697                        |                          |                |
| U025     | B10  | 11467  | 11450 | 0.21  | 1473                        | 1472                     | 0.123          |
|          | B09  | 11433  |       |       | 1471                        |                          |                |
| U026     | C09  | 4959   | 4866  | 2.7   | 900                         | 890                      | 1.59           |
|          | C10  | 4773   |       |       | 880                         |                          |                |
| U027     | D10  | 49769  | 49363 | 1.16  | 3494                        | 3477                     | 0.692          |
|          | D09  | 48956  |       |       | 3460                        |                          |                |
| U028     | E10  | 7974   | 8002  | 0.495 | 1191                        | 1193                     | 0.29           |
|          | E09  | 8030   |       |       | 1196                        |                          |                |
| U029     | F10  | 29637  | 29768 | 0.62  | 2572                        | 2578                     | 0.365          |
|          | F09  | 29898  |       |       | 2585                        |                          |                |
| U030     | G10  | 26146  | 26669 | 2.77  | 2389                        | 2417                     | 1.63           |
|          | G09  | 27191  |       |       | 2445                        |                          |                |
| U031     | H09  | 25092  | 25734 | 3.53  | 2332                        | 2367                     | 2.07           |
|          | H10  | 26376  |       |       | 2401                        |                          |                |
| U032     | A11  | 23933  | 21972 | 12.6  | 2268                        | 2155                     | 7.42           |
|          | A12  | 20010  |       |       | 2042                        |                          |                |

**Blank Data Table**

Plate: Plate\_\*25D1OAS391A\*

Assay: Abeta 1-38

Group: Blank

| Sample * | Well | Signal | Mean | CV  |
|----------|------|--------|------|-----|
| B001     | H02  | 76     | 72   | 8.9 |
|          | H01  | 67     |      |     |

**Control Data Table**

Plate: Plate\_\*25D1OAS391A\*

Assay: Abeta 1-38

Group: Control

| Sample * | Well | Concentration (pg/ml) | Signal | Mean  | CV    | % Recovery | % Recovery Mean | Calc. Concentration (pg/ml) | Calc. Conc. Mean (pg/ml) | Calc. Conc. CV |
|----------|------|-----------------------|--------|-------|-------|------------|-----------------|-----------------------------|--------------------------|----------------|
| STD 2    | C12  | 2691                  | 90619  | 90891 | 0.423 | 93         | 93.2            | 2502                        | 2507                     | 0.257          |
|          | C11  |                       | 91163  |       |       | 93.3       |                 | 2511                        |                          |                |
| STD 3    | D12  | 673                   | 8853   | 8792  | 0.981 | 94.1       | 93.7            | 633                         | 630                      | 0.575          |
|          | D11  |                       | 8731   |       |       | 93.3       |                 | 628                         |                          |                |
| STD 4    | E11  | 168                   | 944    | 912   | 4.96  | 97.9       | 95.8            | 165                         | 161                      | 3.17           |
|          | E12  |                       | 880    |       |       | 93.6       |                 | 157                         |                          |                |
| STD 5    | F12  | 42                    | 195    | 193   | 1.84  | 119        | 117             | 49.9                        | 49.2                     | 1.93           |
|          | F11  |                       | 190    |       |       | 115        |                 | 48.5                        |                          |                |

Plot: Standard 38

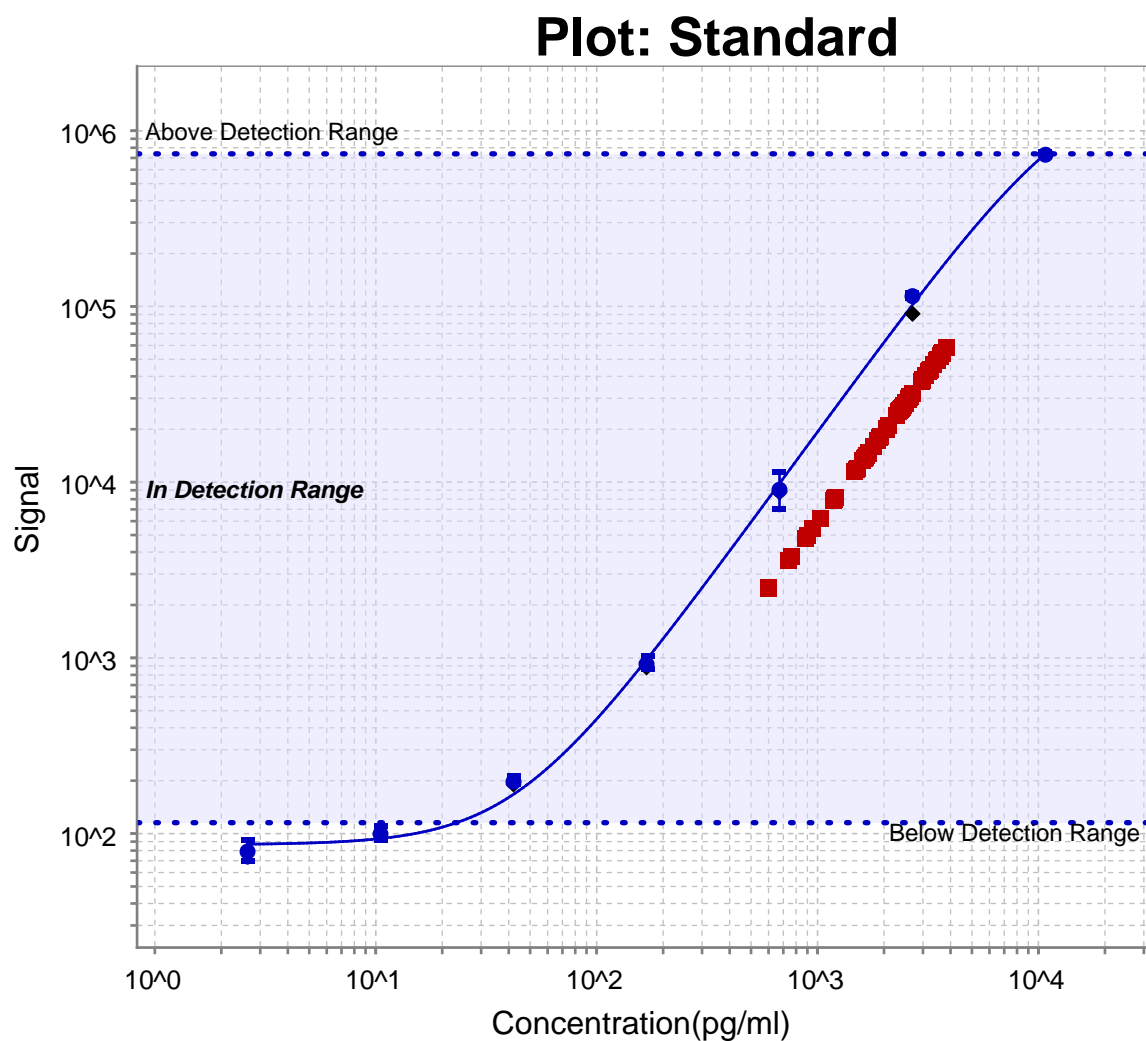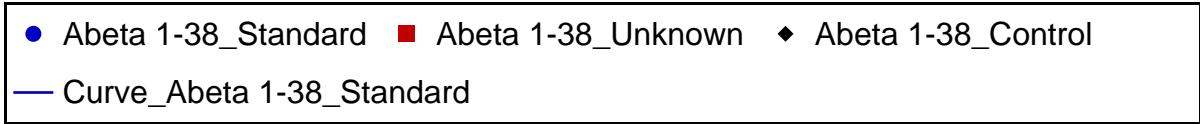

## Standard Data Table

Plate: Plate\_\*25D1OAS391A\*

Assay: Abeta 1-40

Group: Standard

| Sample * | Well | Concentration (pg/ml) | Signal | Mean   | CV    | Calc. Concentration (pg/ml) | Calc. Conc. Mean (pg/ml) | Calc. Conc. CV |
|----------|------|-----------------------|--------|--------|-------|-----------------------------|--------------------------|----------------|
| S001     | A02  | 15316                 | 561671 | 559136 | 0.641 | 18020                       | 17678                    | 2.73           |
|          | A01  |                       | 556601 |        |       | 17336                       |                          |                |
| S002     | B01  | 3829                  | 195698 | 197004 | 0.938 | 3520                        | 3541                     | 0.822          |
|          | B02  |                       | 198310 |        |       | 3562                        |                          |                |
| S003     | C02  | 957                   | 35950  | 34666  | 5.24  | 1037                        | 1013                     | 3.4            |
|          | C01  |                       | 33382  |        |       | 988                         |                          |                |
| S004     | D02  | 239                   | 3552   | 3655   | 3.97  | 240                         | 245                      | 2.5            |
|          | D01  |                       | 3757   |        |       | 249                         |                          |                |
| S005     | E01  | 59.8                  | 399    | 420    | 6.91  | 55.3                        | 57.5                     | 5.28           |
|          | E02  |                       | 440    |        |       | 59.6                        |                          |                |
| S006     | F01  | 15                    | 118    | 121    | 2.93  | 14.5                        | 15.1                     | 5.71           |
|          | F02  |                       | 123    |        |       | 15.7                        |                          |                |
| S007     | G02  | 3.74                  | 90     | 87     | 4.88  | 5.58                        | 3.83                     | 64.8           |
|          | G01  |                       | 84     |        |       | 2.07                        |                          |                |

## Standard Analysis Properties

| Name                       | Value                                             |
|----------------------------|---------------------------------------------------|
| Algorithm Parameters       |                                                   |
| Initial Top                | 564727                                            |
| Initial Bottom             | 78.3                                              |
| Initial MidPoint           | 6449                                              |
| Initial HillSlope          | 1                                                 |
| Weighting                  | 1/y^2                                             |
| Max Iteration              | 500                                               |
| Fit Statistics             |                                                   |
| RSquared                   | 0.998                                             |
| Calculated Parameters      |                                                   |
| Top                        | 652887                                            |
| Bottom                     | 82.5                                              |
| MidPoint                   | 5921                                              |
| HillSlope                  | 1.63                                              |
| Detection Range Parameters |                                                   |
| Low                        | 12.8                                              |
| High                       | 15316                                             |
| Equation                   |                                                   |
| FourPL                     | $y = b_2 + \frac{b_1 - b_2}{1 + (x / b_3)^{b_4}}$ |



## Unknown Data Table

Plate: Plate\_\*25D1OAS391A\*

Assay: Abeta 1-40

Group: Unknown

| Sample *   | Well | Signal | Mean   | CV   | Calc. Concentration (pg/ml) | Calc. Conc. Mean (pg/ml) | Calc. Conc. CV |
|------------|------|--------|--------|------|-----------------------------|--------------------------|----------------|
| Control 1  | A04  | 96693  | 95643  | 1.55 | 4054                        | 4022                     | 1.11           |
|            | A03  | 94593  |        |      | 3990                        |                          |                |
| Control 2  | H11  | 85455  | 82481  | 5.1  | 3712                        | 3621                     | 3.58           |
|            | H12  | 79507  |        |      | 3529                        |                          |                |
| NAD1 Alpha | G11  | 165082 | 162714 | 2.06 | 6097                        | 6025                     | 1.68           |
|            | G12  | 160346 |        |      | 5954                        |                          |                |
| NCT1 Alpha | B11  | 108084 | 103653 | 6.05 | 4396                        | 4263                     | 4.41           |
|            | B12  | 99221  |        |      | 4130                        |                          |                |
| U001       | B03  | 63327  | 65952  | 5.63 | 3018                        | 3102                     | 3.84           |
|            | B04  | 68576  |        |      | 3186                        |                          |                |
| U002       | C03  | 147579 | 151153 | 3.34 | 5571                        | 5678                     | 2.67           |
|            | C04  | 154726 |        |      | 5785                        |                          |                |
| U003       | D04  | 88332  | 86344  | 3.26 | 3800                        | 3740                     | 2.3            |
|            | D03  | 84356  |        |      | 3679                        |                          |                |
| U004       | E03  | 112058 | 114658 | 3.21 | 4514                        | 4592                     | 2.38           |
|            | E04  | 117258 |        |      | 4669                        |                          |                |
| U005       | F03  | 114328 | 118396 | 4.86 | 4582                        | 4703                     | 3.64           |
|            | F04  | 122463 |        |      | 4824                        |                          |                |
| U006       | G03  | 140533 | 143026 | 2.46 | 5361                        | 5435                     | 1.93           |
|            | G04  | 145518 |        |      | 5509                        |                          |                |
| U007       | H03  | 45851  | 46365  | 1.57 | 2432                        | 2450                     | 1.03           |
|            | H04  | 46878  |        |      | 2468                        |                          |                |
| U008       | A06  | 137599 | 137366 | 0.24 | 5273                        | 5266                     | 0.186          |
|            | A05  | 137133 |        |      | 5259                        |                          |                |
| U009       | B06  | 208607 | 211385 | 1.86 | 7451                        | 7541                     | 1.68           |

Plate: Plate\_\*25D1OAS391A\*

Assay: Abeta 1-40

Group: Unknown

| Sample # | Well | Signal | Mean   | CV    | Calc. Concentration (pg/ml) | Calc. Conc. Mean (pg/ml) | Calc. Conc. CV |
|----------|------|--------|--------|-------|-----------------------------|--------------------------|----------------|
|          | B05  | 214162 |        |       | 7631                        |                          |                |
| U010     | C05  | 165649 | 170506 | 4.03  | 6114                        | 6262                     | 3.34           |
|          | C06  | 175362 |        |       | 6410                        |                          |                |
| U011     | D05  | 141612 | 145049 | 3.35  | 5393                        | 5495                     | 2.64           |
|          | D06  | 148485 |        |       | 5598                        |                          |                |
| U012     | E06  | 138731 | 135566 | 3.3   | 5307                        | 5213                     | 2.55           |
|          | E05  | 132400 |        |       | 5119                        |                          |                |
| U013     | F06  | 24817  | 24075  | 4.36  | 1634                        | 1602                     | 2.78           |
|          | F05  | 23333  |        |       | 1571                        |                          |                |
| U014     | G06  | 32680  | 30944  | 7.93  | 1950                        | 1882                     | 5.12           |
|          | G05  | 29208  |        |       | 1813                        |                          |                |
| U015     | H06  | 171405 | 166730 | 3.97  | 6289                        | 6147                     | 3.26           |
|          | H05  | 162055 |        |       | 6005                        |                          |                |
| U016     | A08  | 125133 | 126947 | 2.02  | 4903                        | 4957                     | 1.54           |
|          | A07  | 128761 |        |       | 5011                        |                          |                |
| U017     | B07  | 74746  | 75272  | 0.987 | 3381                        | 3397                     | 0.684          |
|          | B08  | 75797  |        |       | 3414                        |                          |                |
| U018     | C07  | 16653  | 16817  | 1.37  | 1268                        | 1276                     | 0.868          |
|          | C08  | 16980  |        |       | 1284                        |                          |                |
| U019     | D07  | 198981 | 197777 | 0.861 | 7144                        | 7106                     | 0.757          |
|          | D08  | 196573 |        |       | 7068                        |                          |                |
| U020     | E07  | 204930 | 201297 | 2.55  | 7333                        | 7218                     | 2.26           |
|          | E08  | 197664 |        |       | 7103                        |                          |                |
| U021     | F08  | 191458 | 193561 | 1.54  | 6908                        | 6974                     | 1.34           |
|          | F07  | 195664 |        |       | 7040                        |                          |                |
| U022     | G07  | 187222 | 181003 | 4.86  | 6776                        | 6584                     | 4.12           |
|          | G08  | 174784 |        |       | 6392                        |                          |                |

Plate: Plate\_\*25D1OAS391A\*

Assay: Abeta 1-40

Group: Unknown

| Sample # | Well | Signal | Mean   | CV    | Calc. Concentration (pg/ml) | Calc. Conc. Mean (pg/ml) | Calc. Conc. CV |
|----------|------|--------|--------|-------|-----------------------------|--------------------------|----------------|
| U023     | H07  | 170584 | 165444 | 4.39  | 6264                        | 6108                     | 3.61           |
|          | H08  | 160303 |        |       | 5953                        |                          |                |
| U024     | A09  | 78037  | 80002  | 3.47  | 3484                        | 3544                     | 2.43           |
|          | A10  | 81966  |        |       | 3605                        |                          |                |
| U025     | B10  | 67960  | 67045  | 1.93  | 3167                        | 3137                     | 1.32           |
|          | B09  | 66129  |        |       | 3108                        |                          |                |
| U026     | C10  | 32225  | 32307  | 0.357 | 1932                        | 1935                     | 0.23           |
|          | C09  | 32388  |        |       | 1938                        |                          |                |
| U027     | D10  | 197744 | 195644 | 1.52  | 7105                        | 7039                     | 1.33           |
|          | D09  | 193543 |        |       | 6973                        |                          |                |
| U028     | E10  | 44116  | 43498  | 2.01  | 2371                        | 2349                     | 1.32           |
|          | E09  | 42880  |        |       | 2327                        |                          |                |
| U029     | F10  | 136989 | 134991 | 2.09  | 5255                        | 5196                     | 1.62           |
|          | F09  | 132992 |        |       | 5136                        |                          |                |
| U030     | G10  | 117394 | 115996 | 1.7   | 4673                        | 4631                     | 1.27           |
|          | G09  | 114598 |        |       | 4590                        |                          |                |
| U031     | H10  | 118896 | 114783 | 5.07  | 4718                        | 4595                     | 3.77           |
|          | H09  | 110669 |        |       | 4473                        |                          |                |
| U032     | A11  | 130688 | 127629 | 3.39  | 5068                        | 4977                     | 2.58           |
|          | A12  | 124570 |        |       | 4886                        |                          |                |

**Blank Data Table**

Plate: Plate\_\*25D1OAS391A\*

Assay: Abeta 1-40

Group: Blank

| Sample * | Well | Signal | Mean | CV   |
|----------|------|--------|------|------|
| B001     | H01  | 66     | 64   | 4.42 |
|          | H02  | 62     |      |      |

**Control Data Table**

Plate: Plate\_\*25D1OAS391A\*

Assay: Abeta 1-40

Group: Control

| Sample * | Well | Concentration (pg/ml) | Signal | Mean   | CV    | % Recovery | % Recovery Mean | Calc. Concentration (pg/ml) | Calc. Conc. Mean (pg/ml) | Calc. Conc. CV |
|----------|------|-----------------------|--------|--------|-------|------------|-----------------|-----------------------------|--------------------------|----------------|
| STD 2    | C11  | 3829                  | 184261 | 182922 | 1.04  | 87.3       | 86.7            | 3342                        | 3321                     | 0.881          |
|          | C12  |                       | 181582 |        |       | 86.2       |                 | 3301                        |                          |                |
| STD 3    | D11  | 957                   | 30329  | 30880  | 2.52  | 97         | 98.2            | 929                         | 940                      | 1.63           |
|          | D12  |                       | 31431  |        |       | 99.3       |                 | 951                         |                          |                |
| STD 4    | E12  | 239                   | 3576   | 3563   | 0.516 | 101        | 101             | 241                         | 241                      | 0.325          |
|          | E11  |                       | 3550   |        |       | 100        |                 | 240                         |                          |                |
| STD 5    | F11  | 59.8                  | 416    | 412    | 1.37  | 95.5       | 94.8            | 57.1                        | 56.7                     | 1.05           |
|          | F12  |                       | 408    |        |       | 94.1       |                 | 56.3                        |                          |                |

Plot: Standard 40

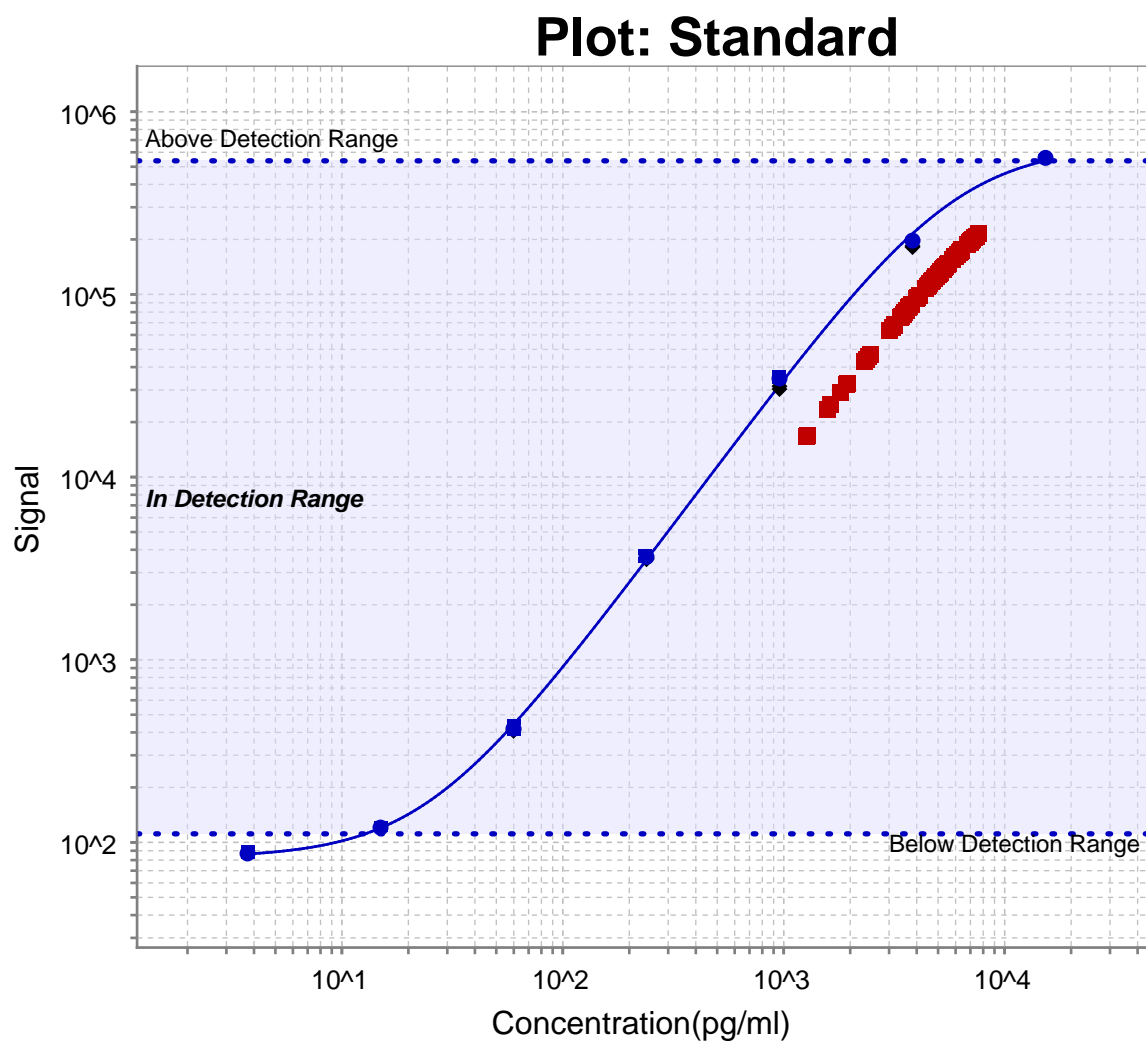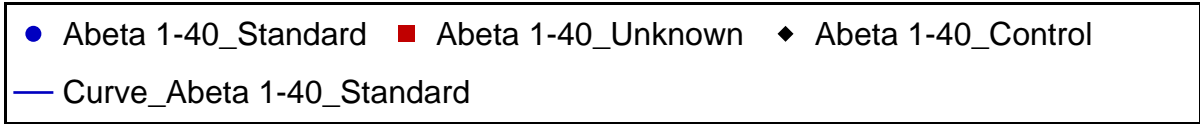

## Standard Data Table

Plate: Plate\_\*25D1OAS391A\*

Assay: Abeta 1-42

Group: Standard

| Sample * | Well | Concentration (pg/ml) | Signal | Mean   | CV    | Calc. Concentration (pg/ml) | Calc. Conc. Mean (pg/ml) | Calc. Conc. CV |
|----------|------|-----------------------|--------|--------|-------|-----------------------------|--------------------------|----------------|
| S001     | A01  | 1379                  | 680597 | 677512 | 0.644 | 1370                        | 1363                     | 0.808          |
|          | A02  |                       | 674427 |        |       | 1355                        |                          |                |
| S002     | B02  | 345                   | 163164 | 161765 | 1.22  | 357                         | 355                      | 0.972          |
|          | B01  |                       | 160366 |        |       | 352                         |                          |                |
| S003     | C02  | 86.2                  | 26781  | 26661  | 0.637 | 92.1                        | 91.8                     | 0.463          |
|          | C01  |                       | 26541  |        |       | 91.5                        |                          |                |
| S004     | D02  | 21.5                  | 3378   | 3087   | 13.3  | 20.5                        | 19.2                     | 9.8            |
|          | D01  |                       | 2796   |        |       | 17.9                        |                          |                |
| S005     | E01  | 5.39                  | 621    | 635    | 3.01  | 5.62                        | 5.72                     | 2.48           |
|          | E02  |                       | 648    |        |       | 5.82                        |                          |                |
| S006     | F01  | 1.35                  | 168    | 176    | 6.04  | 1.48                        | 1.58                     | 8.4            |
|          | F02  |                       | 183    |        |       | 1.67                        |                          |                |
| S007     | G01  | 0.337                 | 89     | 91     | 2.34  | 0.156                       | 0.2                      | 30.7           |
|          | G02  |                       | 92     |        |       | 0.243                       |                          |                |

## Standard Analysis Properties

| Name                       | Value                                             |
|----------------------------|---------------------------------------------------|
| Algorithm Parameters       |                                                   |
| Initial Top                | 684287                                            |
| Initial Bottom             | 81.4                                              |
| Initial MidPoint           | 700                                               |
| Initial HillSlope          | 1                                                 |
| Weighting                  | 1/y^2                                             |
| Max Iteration              | 500                                               |
| Fit Statistics             |                                                   |
| RSquared                   | 1                                                 |
| Calculated Parameters      |                                                   |
| Top                        | 1568063                                           |
| Bottom                     | 85.5                                              |
| MidPoint                   | 1656                                              |
| HillSlope                  | 1.4                                               |
| Detection Range Parameters |                                                   |
| Low                        | 0.81                                              |
| High                       | 1379                                              |
| Equation                   |                                                   |
| FourPL                     | $y = b_2 + \frac{b_1 - b_2}{1 + (x / b_3)^{b_4}}$ |



## Unknown Data Table

Plate: Plate\_\*25D1OAS391A\*

Assay: Abeta 1-42

Group: Unknown

| Sample *   | Well | Signal | Mean   | CV    | Calc. Concentration (pg/ml) | Calc. Conc. Mean (pg/ml) | Calc. Conc. CV |
|------------|------|--------|--------|-------|-----------------------------|--------------------------|----------------|
| Control 1  | A04  | 62878  | 63224  | 0.774 | 345                         | 346                      | 0.575          |
|            | A03  | 63570  |        |       | 347                         |                          |                |
| Control 2  | H12  | 46698  | 47601  | 2.68  | 277                         | 281                      | 1.97           |
|            | H11  | 48503  |        |       | 284                         |                          |                |
| NAD1 Alpha | G12  | 49677  | 51549  | 5.13  | 290                         | 297                      | 3.79           |
|            | G11  | 53420  |        |       | 305                         |                          |                |
| NCT1 Alpha | B12  | 72485  | 73965  | 2.83  | 383                         | 389                      | 2.12           |
|            | B11  | 75444  |        |       | 395                         |                          |                |
| U001       | B03  | 12323  | 12469  | 1.66  | 105                         | 106                      | 1.2            |
|            | B04  | 12615  |        |       | 107                         |                          |                |
| U002       | C04  | 33763  | 34107  | 1.42  | 218                         | 220                      | 1.04           |
|            | C03  | 34450  |        |       | 221                         |                          |                |
| U003       | D03  | 16002  | 15855  | 1.32  | 127                         | 126                      | 0.952          |
|            | D04  | 15707  |        |       | 125                         |                          |                |
| U004       | E04  | 22497  | 22370  | 0.806 | 162                         | 162                      | 0.585          |
|            | E03  | 22242  |        |       | 161                         |                          |                |
| U005       | F04  | 75624  | 74419  | 2.29  | 396                         | 391                      | 1.71           |
|            | F03  | 73213  |        |       | 386                         |                          |                |
| U006       | G03  | 102610 | 102639 | 0.039 | 498                         | 498                      | 0.03           |
|            | G04  | 102667 |        |       | 498                         |                          |                |
| U007       | H04  | 8061   | 8041   | 0.361 | 77.3                        | 77.1                     | 0.261          |
|            | H03  | 8020   |        |       | 77                          |                          |                |
| U008       | A05  | 123739 | 122405 | 1.54  | 575                         | 570                      | 1.19           |
|            | A06  | 121071 |        |       | 565                         |                          |                |
| U009       | B05  | 72279  | 72648  | 0.717 | 382                         | 384                      | 0.536          |

Plate: Plate\_\*25D1OAS391A\*

Assay: Abeta 1-42

Group: Unknown

| Sample # | Well | Signal | Mean   | CV    | Calc. Concentration (pg/ml) | Calc. Conc. Mean (pg/ml) | Calc. Conc. CV |
|----------|------|--------|--------|-------|-----------------------------|--------------------------|----------------|
|          | B06  | 73016  |        |       | 385                         |                          |                |
| U010     | C06  | 45172  | 44949  | 0.703 | 270                         | 269                      | 0.517          |
|          | C05  | 44725  |        |       | 268                         |                          |                |
| U011     | D06  | 98741  | 105328 | 8.84  | 484                         | 508                      | 6.76           |
|          | D05  | 111915 |        |       | 532                         |                          |                |
| U012     | E06  | 116179 | 117215 | 1.25  | 548                         | 552                      | 0.963          |
|          | E05  | 118251 |        |       | 555                         |                          |                |
| U013     | F05  | 11279  | 11291  | 0.144 | 98.5                        | 98.6                     | 0.104          |
|          | F06  | 11302  |        |       | 98.7                        |                          |                |
| U014     | G06  | 16518  | 15862  | 5.85  | 130                         | 126                      | 4.23           |
|          | G05  | 15206  |        |       | 122                         |                          |                |
| U015     | H06  | 58935  | 58076  | 2.09  | 328                         | 325                      | 1.55           |
|          | H05  | 57216  |        |       | 321                         |                          |                |
| U016     | A07  | 106130 | 106896 | 1.01  | 511                         | 514                      | 0.775          |
|          | A08  | 107661 |        |       | 517                         |                          |                |
| U017     | B08  | 40375  | 39462  | 3.27  | 249                         | 244                      | 2.4            |
|          | B07  | 38549  |        |       | 240                         |                          |                |
| U018     | C08  | 8028   | 8065   | 0.649 | 77                          | 77.3                     | 0.469          |
|          | C07  | 8102   |        |       | 77.6                        |                          |                |
| U019     | D07  | 68714  | 67940  | 1.61  | 368                         | 365                      | 1.2            |
|          | D08  | 67166  |        |       | 362                         |                          |                |
| U020     | E08  | 66412  | 65116  | 2.82  | 359                         | 354                      | 2.1            |
|          | E07  | 63819  |        |       | 348                         |                          |                |
| U021     | F08  | 65575  | 65385  | 0.411 | 356                         | 355                      | 0.306          |
|          | F07  | 65195  |        |       | 354                         |                          |                |
| U022     | G07  | 53823  | 53575  | 0.655 | 307                         | 306                      | 0.484          |
|          | G08  | 53327  |        |       | 305                         |                          |                |

Plate: Plate\_\*25D1OAS391A\*

Assay: Abeta 1-42

Group: Unknown

| Sample # | Well | Signal | Mean   | CV    | Calc. Concentration (pg/ml) | Calc. Conc. Mean (pg/ml) | Calc. Conc. CV |
|----------|------|--------|--------|-------|-----------------------------|--------------------------|----------------|
| U023     | H08  | 45313  | 46583  | 3.85  | 271                         | 276                      | 2.83           |
|          | H07  | 47852  |        |       | 282                         |                          |                |
| U024     | A10  | 41256  | 41224  | 0.11  | 253                         | 252                      | 0.08           |
|          | A09  | 41192  |        |       | 252                         |                          |                |
| U025     | B10  | 33709  | 33492  | 0.916 | 218                         | 217                      | 0.669          |
|          | B09  | 33275  |        |       | 216                         |                          |                |
| U026     | C09  | 5697   | 5665   | 0.799 | 60.1                        | 59.8                     | 0.58           |
|          | C10  | 5633   |        |       | 59.6                        |                          |                |
| U027     | D10  | 61088  | 61151  | 0.146 | 337                         | 338                      | 0.108          |
|          | D09  | 61214  |        |       | 338                         |                          |                |
| U028     | E10  | 22366  | 22439  | 0.457 | 162                         | 162                      | 0.331          |
|          | E09  | 22511  |        |       | 162                         |                          |                |
| U029     | F09  | 104543 | 106039 | 1.99  | 505                         | 511                      | 1.52           |
|          | F10  | 107534 |        |       | 516                         |                          |                |
| U030     | G09  | 85620  | 86435  | 1.33  | 434                         | 437                      | 1.01           |
|          | G10  | 87250  |        |       | 440                         |                          |                |
| U031     | H10  | 79836  | 79003  | 1.49  | 412                         | 409                      | 1.12           |
|          | H09  | 78169  |        |       | 405                         |                          |                |
| U032     | A11  | 22976  | 22257  | 4.57  | 165                         | 161                      | 3.31           |
|          | A12  | 21538  |        |       | 157                         |                          |                |

**Blank Data Table**

Plate: Plate\_\*25D1OAS391A\*

Assay: Abeta 1-42

Group: Blank

| Sample * | Well | Signal | Mean | CV   |
|----------|------|--------|------|------|
| B001     | H01  | 69     | 67   | 5.32 |
|          | H02  | 64     |      |      |

**Control Data Table**

Plate: Plate\_\*25D1OAS391A\*

Assay: Abeta 1-42

Group: Control

| Sample # | Well | Concentration (pg/ml) | Signal | Mean   | CV    | % Recovery | % Recovery Mean | Calc. Concentration (pg/ml) | Calc. Conc. Mean (pg/ml) | Calc. Conc. CV |
|----------|------|-----------------------|--------|--------|-------|------------|-----------------|-----------------------------|--------------------------|----------------|
| STD 2    | C11  | 345                   | 145395 | 144019 | 1.35  | 94.6       | 93.9            | 326                         | 324                      | 1.06           |
|          | C12  |                       | 142643 |        |       | 93.2       |                 | 321                         |                          |                |
| STD 3    | D12  | 86.2                  | 21889  | 20159  | 12.1  | 92.3       | 86.9            | 79.6                        | 74.9                     | 8.8            |
|          | D11  |                       | 18429  |        |       | 81.5       |                 | 70.3                        |                          |                |
| STD 4    | E11  | 21.5                  | 3154   | 3033   | 5.67  | 90.6       | 88              | 19.5                        | 19                       | 4.16           |
|          | E12  |                       | 2911   |        |       | 85.4       |                 | 18.4                        |                          |                |
| STD 5    | F12  | 5.39                  | 539    | 540    | 0.262 | 92.8       | 92.9            | 5                           | 5                        | 0.222          |
|          | F11  |                       | 541    |        |       | 93         |                 | 5.01                        |                          |                |

Plot: Standard 42

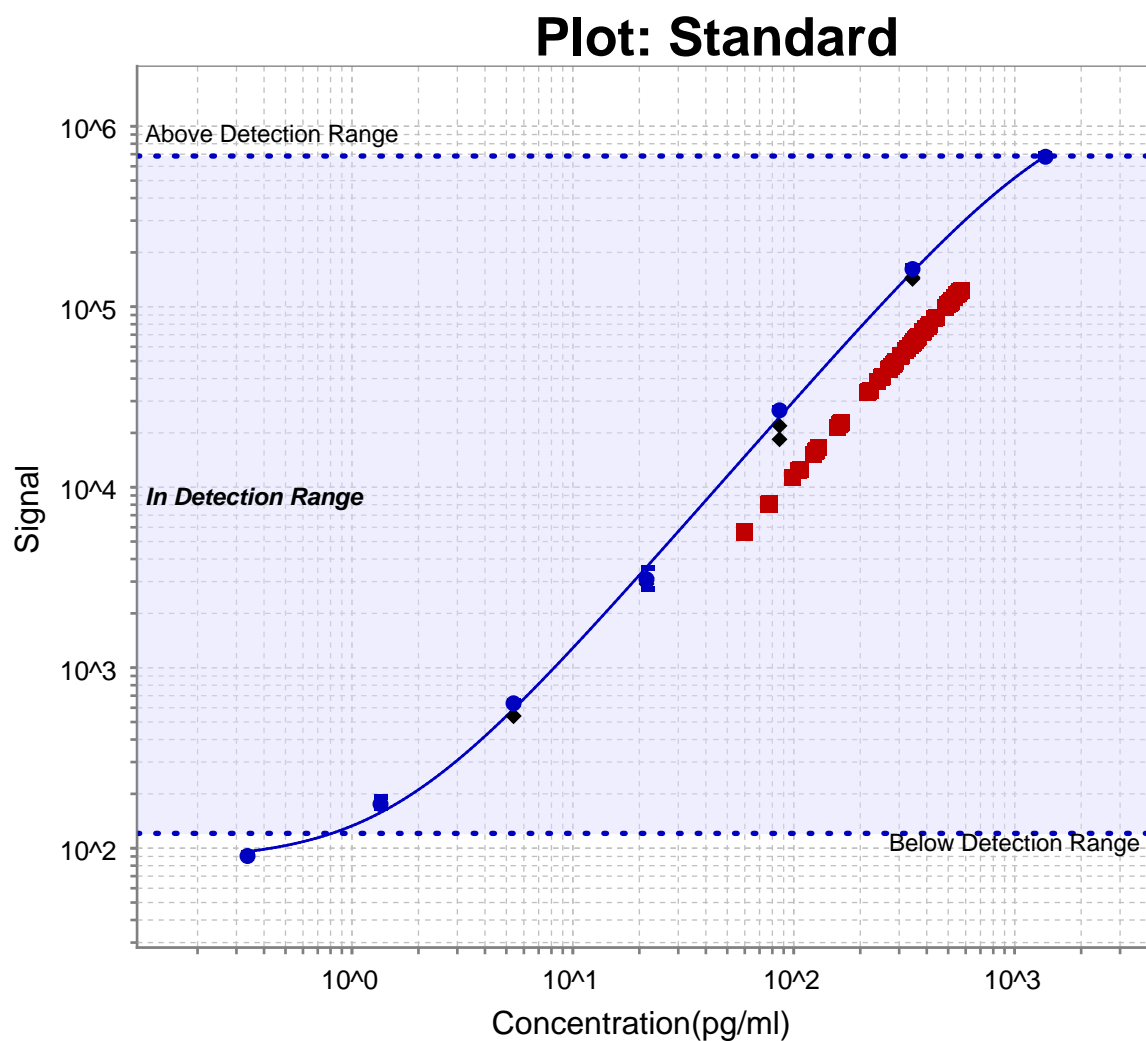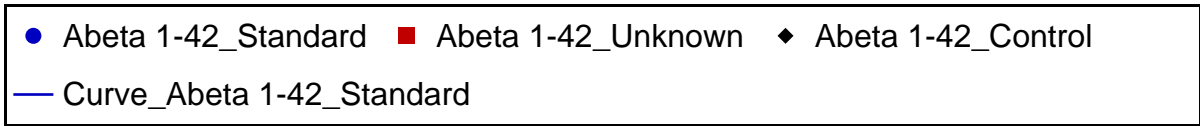

Supplement: alzrt236-S11.pdf [file alzrt236-S11.pdf]
